# Supplementary material for: Catalytic Enantioselective Synthesis of Heterocyclic Vicinal Fluoroamines by Using Asymmetric Protonation: Method Development and Mechanistic Study
Source: PubMed Central journal article supplement (PMC7540707; doi:10.1002/chem.202002543), 2020-08-18
Supplement: CHEM-26-12249-s001.pdf [file CHEM-26-12249-s001.pdf]

# Chemistry–A European Journal

Supporting Information

## **Catalytic Enantioselective Synthesis of Heterocyclic Vicinal Fluoroamines by Using Asymmetric Protonation: Method Development and Mechanistic Study\*\***

Matthew W. Ashford,<sup>[a]</sup> Chao Xu,<sup>[a]</sup> John J. Molloy,<sup>[a]</sup> Cameron Carpenter-Warren,<sup>[a]</sup>  
Alexandra M. Z. Slawin,<sup>[a]</sup> Andrew G. Leach,<sup>\*[b]</sup> and Allan J. B. Watson<sup>\*[a]</sup>

## Table of Contents

|                                                    |             |
|----------------------------------------------------|-------------|
| <b>1. General.....</b>                             | <b>S3</b>   |
| <b>2. General Experimental Procedures .....</b>    | <b>S4</b>   |
| <b>3. Optimization of Reaction Conditions.....</b> | <b>S6</b>   |
| <b>4. Catalyst ee vs. Product ee .....</b>         | <b>S7</b>   |
| <b>5. Mechanistic Study.....</b>                   | <b>S8</b>   |
| 5.1 DFT Calculations .....                         | S8          |
| 5.2 HRMS Study .....                               | S12         |
| 5.2 Kinetic Isotope Effect Study .....             | S13         |
| <b>6. Ramachandran Plots .....</b>                 | <b>S15</b>  |
| <b>7. Characterization Data for Compounds.....</b> | <b>S17</b>  |
| <b>8. References.....</b>                          | <b>S65</b>  |
| <b>9. NMR Spectra.....</b>                         | <b>S66</b>  |
| <b>10. X-Ray Data .....</b>                        | <b>S122</b> |

## 1. General

All reagents and solvents were obtained from commercial suppliers and were used without further purification unless otherwise stated. Purification was carried out according to standard laboratory methods.<sup>1</sup>

### 1.1 Purification of Solvents

Dry THF for reactions were obtained from a PureSolv SPS-400-5 solvent purification system. Et<sub>2</sub>O, EtOAc, and petroleum ether 40-60 °C for purification purposes were used as obtained from suppliers without further purification.

### 1.2 Experimental Details

Reactions were carried out using conventional glassware (preparation of intermediates), 2 mL HPLC vials, or in capped 5, 10, and 20 mL microwave vials. The glassware was oven-dried (150 °C) and purged with N<sub>2</sub> before use. Purging refers to a vacuum/nitrogen-refilling procedure. Prior to use, Mg turnings were oven-dried at 150 °C overnight. TRIP refers to 3,3'-bis(2,4,6-triisopropylphenyl)-1,1'-binaphthyl-2,2'-diyl hydrogenphosphate. Room temperature (rt) was generally *ca.* 18 °C. Reactions were carried out at elevated temperatures using a temperature-regulated hotplate/stirrer with a sand bath. Reactions were carried out at -10, -20, and -50 °C using an isopropanol bath cooled by a Thermo Haake EK90 cryocooler. Reactions were carried out at 0 °C using an ice/water bath.

### 1.3 Purification of Products

Thin layer chromatography was carried out using Merck silica plates coated with fluorescent indicator UV254. These were analyzed under 254 nm UV light, developed using potassium permanganate or vanillin solutions. Normal phase flash chromatography was carried out using ZEOprep 60 HYD 40-63 μm silica gel.

### 1.4 Analysis of Products

Fourier Transformed Infra-Red (FTIR) spectra were obtained on a Shimadzu IRAffinity-1 machine. <sup>19</sup>F NMR spectra were obtained on either a Bruker AV 400 spectrometer at 376 or 377 MHz, or a Bruker AV 500 spectrometer at 470 MHz, respectively. <sup>11</sup>B NMR spectra were obtained on a Bruker AV 400 spectrometer at 128 MHz. <sup>1</sup>H and <sup>13</sup>C NMR spectra were obtained on either a Bruker AV 400 at 400 MHz and 101 MHz, respectively, or Bruker DRX 500 at 500 MHz and 126 MHz, respectively. Chemical shifts are reported in ppm and coupling constants are reported in Hz with CDCl<sub>3</sub> referenced at 7.26 (<sup>1</sup>H) and 77.0 ppm (<sup>13</sup>C) and DMSO-*d*<sub>6</sub> referenced at 2.50 (<sup>1</sup>H) and 39.5 (<sup>13</sup>C). <sup>11</sup>B NMR spectra are referenced to BF<sub>3</sub>·Et<sub>2</sub>O. Unless otherwise stated, *J* refers to <sup>3</sup>J<sub>HH</sub> and *J*<sub>CF</sub> in <sup>1</sup>H and <sup>13</sup>C NMR, respectively. High-resolution mass spectra were obtained either through analysis at the EPSRC UK National Mass Spectrometry Facility at Swansea University, or through analysis at the University of St Andrews. High performance liquid chromatography (HPLC) was performed on an Agilent 1200 series HPLC using a chiral stationary phase column (column, Daicel Co. CHIRALCEL OJ-H, or CHIRALPAK IA; eluent: *n*-hexane/*i*-PrOH). All solvents used were HPLC-grade solvents purchased from Fisher. The column employed and the respective solvent mixture are indicated for each experiment. Optical rotations were obtained on a Perkin Elmer Model 341 polarimeter.

## 2. General Experimental Procedures

**General Procedure A: Aza-Michael reaction catalyzed using a chiral acid (THF as solvent). For example, preparation of 7a.**

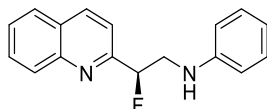

A 2 mL HPLC vial was charged with 2-(1-fluorovinyl)quinoline (17.3 mg, 0.10 mmol, 1.0 equiv), and (*S*)-TRIP catalyst (15.1 mg, 0.02 mmol, 20 mol%). The vial was then capped and purged with N<sub>2</sub> before adding THF (200  $\mu$ L, 0.5 M). The reaction mixture was cooled to  $-10$   $^{\circ}$ C for 15 min before the addition of aniline (27  $\mu$ L, 0.30 mmol, 3.0 equiv). The resulting mixture was then allowed to stir at  $-10$   $^{\circ}$ C for 3 d before being quenched by sat. aq. K<sub>2</sub>CO<sub>3</sub> solution (2 mL). The phases were separated and the aqueous phase extracted with EtOAc (5 mL  $\times$  3). The organic phases were combined, dried over Na<sub>2</sub>SO<sub>4</sub>, filtered, and concentrated *in vacuo*. Purification of the crude *via* flash chromatography (silica gel, EtOAc:petroleum ether, 5:95 to 10:90) gave the desired product as a pale yellow oil (21.8 mg, 82%, 96:4 e.r.).

**General Procedure B: Aza-Michael reaction catalyzed using a chiral acid (CPME as solvent). For example, preparation of 7b.**

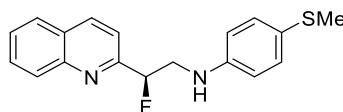

A 2 mL HPLC vial was charged with 2-(1-fluorovinyl)quinoline (17.3 mg, 0.10 mmol, 1.0 equiv), and (*S*)-TRIP catalyst (15.1 mg, 0.02 mmol, 20 mol%). The vial was then capped and purged with N<sub>2</sub> before adding CPME (200  $\mu$ L, 0.5 M). The reaction mixture was cooled to  $-20$   $^{\circ}$ C for 15 min before the addition of 4-(methylthio)aniline (41.7 mg, 0.3 mmol, 3.0 equiv). The resulting mixture was then allowed to stir at  $-20$   $^{\circ}$ C for 5 d before being quenched by sat. aq. K<sub>2</sub>CO<sub>3</sub> solution (2 mL). The phases were separated and the aqueous phase extracted with EtOAc (5 mL  $\times$  3). The organic phases were combined, dried over Na<sub>2</sub>SO<sub>4</sub>, filtered, and concentrated *in vacuo*. Purification of the crude *via* flash chromatography (silica gel, EtOAc:petroleum ether, 5:95 to 10:90) gave the desired product as a pale yellow oil (29.0 mg, 93%, 97:3 e.r.).

**General Procedure C: Hiyama coupling. For example, preparation of 5a.**

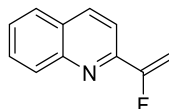

Prepared according to adapted literature procedure.<sup>2</sup>

An oven dried, 20 mL microwave vial was charged with 2-bromoquinoline (207 mg, 1.00 mmol, 1.0 equiv), (1-fluorovinyl)(methyl)diphenylsilane (356 mg, 1.5 mmol, 1.5 equiv), Pd(PPh<sub>3</sub>)<sub>4</sub> (57.8 mg, 0.05 mmol, 5 mol%), CuI (9.7 mg, 0.05 mmol, 5 mol%) and CsF (357 mg, 2.35 mmol, 2.35 equiv). The microwave vial was then capped and purged with N<sub>2</sub> before addition of DMF (10 mL, 0.1 M). The reaction mixture was then allowed to stir at rt for 3.5 h. The reaction was quenched with water (20 mL)

and diluted with Et<sub>2</sub>O (20 mL). The organic phase was separated, washed with water (2 × 10 mL) and brine (10 mL), dried over Na<sub>2</sub>SO<sub>4</sub>, filtered, and concentrated *in vacuo*. Purification of the crude *via* flash chromatography (silica gel, Et<sub>2</sub>O:petroleum ether, 1:99) gave the desired product as a pale yellow oil (161 mg, 93%).

#### General Procedure D: Catalyst e.r. vs product e.r.

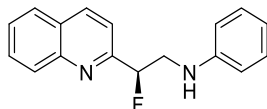

A 2 mL HPLC vial was charged with 2-(1-fluorovinyl)quinoline (17.3 mg, 0.10 mmol, 1.0 equiv), and different ratios of (*S*)- and (*R*)-TRIP catalyst (15.1 mg, 0.02 mmol, 20 mol%) (cat. e.r.: 60:40, 70:30, 80:20, 90:10 and 100:0). The vial was then capped and purged with N<sub>2</sub> before adding THF (200 μL, 0.5 M). The reaction mixture was cooled to -10 °C for 15 min before the addition of aniline (27 μL, 0.30 mmol, 3.0 equiv). The resulting mixture was then allowed to stir at -10 °C for 3 d before being quenched by sat. aq. K<sub>2</sub>CO<sub>3</sub> solution (1 mL). The phases were separated and the aqueous phase was extracted with EtOAc (10 mL × 3). The organic phases were combined, dried over Na<sub>2</sub>SO<sub>4</sub>, filtered, and concentrated *in vacuo*. The e.r. of the product was determined by HPLC with an internal standard.

#### General Procedure E: Kinetic isotope effect

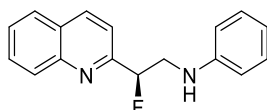

A 2mL HPLC vial was charged with 2-(1-fluorovinyl)quinoline (17.3 mg, 0.10 mmol, 1.0 equiv), (*S*)-TRIP catalyst (15.1 mg, 0.02 mmol, 20 mol%), and aniline (27 μL, 0.30 mmol, 3.0 equiv). The vial was then capped and purged with N<sub>2</sub> before adding *d*<sub>8</sub>-THF (400 μL, 0.25 M). The resulting mixture was then transferred into a 0.5mm NMR tubes (7 inch) and <sup>19</sup>F NMR was taken every 6 min for a period of 5 h to allow the determination of the conversion.

### 3. Optimization of Reaction Conditions

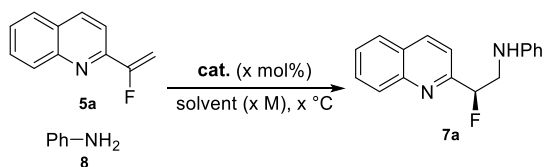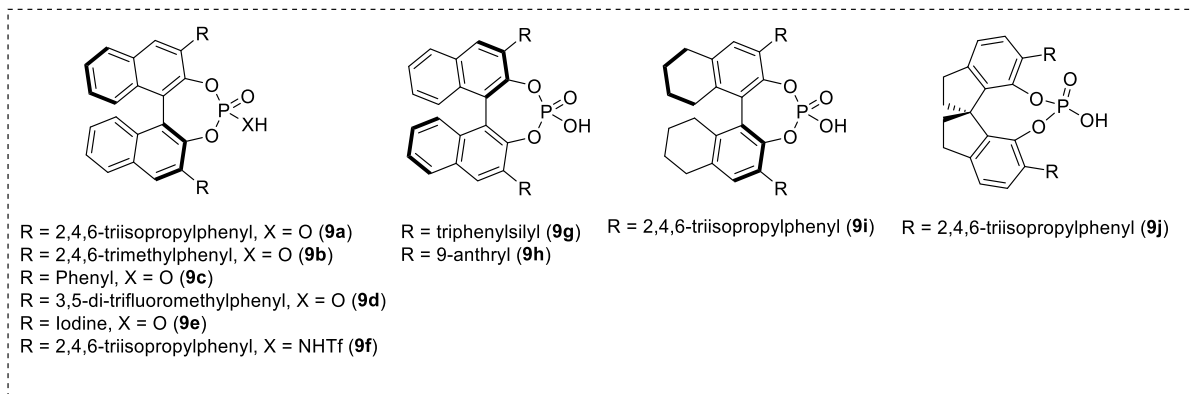

| Entry     | Solvent                         | Concentration (M) | Time (h)  | Catalyst  | Cat. loading (mol%) | Temp. (°C) | Aniline (equiv) | % conv. <sup>a</sup> (e.r.)  |
|-----------|---------------------------------|-------------------|-----------|-----------|---------------------|------------|-----------------|------------------------------|
| 1         | THF                             | 0.5               | 48        | 9a        | ---                 | -20        | 3               | 0 (---)                      |
| 2         | THF                             | 0.5               | 48        | 9a        | 20                  | -20        | 3               | 40 (96:4)                    |
| 3         | THF                             | 0.5               | 96        | 9a        | 20                  | -20        | 3               | 68 (97:3)                    |
| 4         | THF                             | 0.25              | 48        | 9a        | 20                  | -20        | 3               | 28 (97:3)                    |
| 5         | THF                             | 0.1               | 48        | 9a        | 20                  | -20        | 3               | 15 (98:2)                    |
| 6         | THF                             | 0.5               | 48        | 9a        | 20                  | -20        | 5               | 48 (95:5)                    |
| 7         | THF                             | 0.5               | 48        | 9a        | 20                  | -20        | 10              | 58 (95:5)                    |
| 8         | THF                             | 0.5               | 48        | 9a        | 10                  | -20        | 3               | 37 (95:5)                    |
| 9         | THF                             | 0.5               | 48        | 9b        | 20                  | -20        | 3               | 25 (88:12)                   |
| 10        | THF                             | 0.5               | 48        | 9c        | 20                  | -20        | 3               | 11 (58:42)                   |
| 11        | THF                             | 0.5               | 48        | 9d        | 20                  | -20        | 3               | n.d. (---)                   |
| 12        | THF                             | 0.5               | 48        | 9e        | 20                  | -20        | 3               | 6 (55:45)                    |
| 13        | THF                             | 0.5               | 48        | 9f        | 20                  | -20        | 3               | n.d. (---)                   |
| 14        | THF                             | 0.5               | 48        | 9g        | 20                  | -20        | 3               | 10 (62:38)                   |
| 15        | THF                             | 0.5               | 48        | 9h        | 20                  | -20        | 3               | 25 (25:75)                   |
| 16        | THF                             | 0.5               | 48        | 9i        | 20                  | -20        | 3               | 28 (89:11)                   |
| 17        | THF                             | 0.5               | 48        | 9j        | 20                  | -20        | 3               | n.d. (---)                   |
| 18        | THF                             | 0.5               | 48        | 9a        | 20                  | -10        | 3               | 68 (96:4)                    |
| <b>19</b> | <b>THF</b>                      | <b>0.5</b>        | <b>72</b> | <b>9a</b> | <b>20</b>           | <b>-10</b> | <b>3</b>        | <b>82<sup>b</sup> (96:4)</b> |
| <b>20</b> | <b>CPME</b>                     | <b>0.5</b>        | <b>72</b> | <b>9a</b> | <b>20</b>           | <b>-10</b> | <b>3</b>        | <b>89<sup>b</sup> (95:5)</b> |
| 21        | hexane                          | 0.5               | 72        | 9a        | 20                  | -10        | 3               | 98 (71:29)                   |
| 22        | toluene                         | 0.5               | 72        | 9a        | 20                  | -10        | 3               | 95 (89:11)                   |
| 23        | Et <sub>2</sub> O               | 0.5               | 72        | 9a        | 20                  | -10        | 3               | 94 (94:6)                    |
| 24        | CH <sub>2</sub> Cl <sub>2</sub> | 0.5               | 72        | 9a        | 20                  | -10        | 3               | 70 (75:25)                   |
| 25        | CPME                            | 0.5               | 120       | 9a        | 20                  | -20        | 3               | 81 (95:5)                    |
| 26        | CPME                            | 0.5               | 120       | 9a        | 10                  | -20        | 3               | 68 (93:7)                    |

<sup>a</sup> Determined by HPLC analysis with internal standard; <sup>b</sup> isolated yield.

## 4. Catalyst ee vs. Product ee

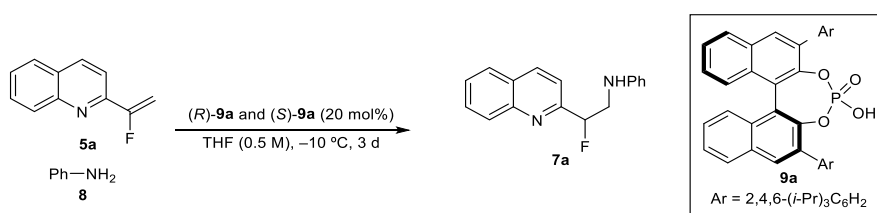

A series of mixtures of *(R)*-TRIP and *(S)*-TRIP were made in varying ratios. Reactions were carried out following General Procedure D, the enantioenrichment of each product was determined by HPLC analysis (Chiralpak IA, hexane/*i*-PrOH = 90/10, flow rate 0.5 mL/min,  $\lambda = 250$  nm),  $t_r$  (major) = 23.4 min,  $t_r$  (minor) = 25.6 min.  $R^2$  suggests no non-linear effects in these initial experiments.

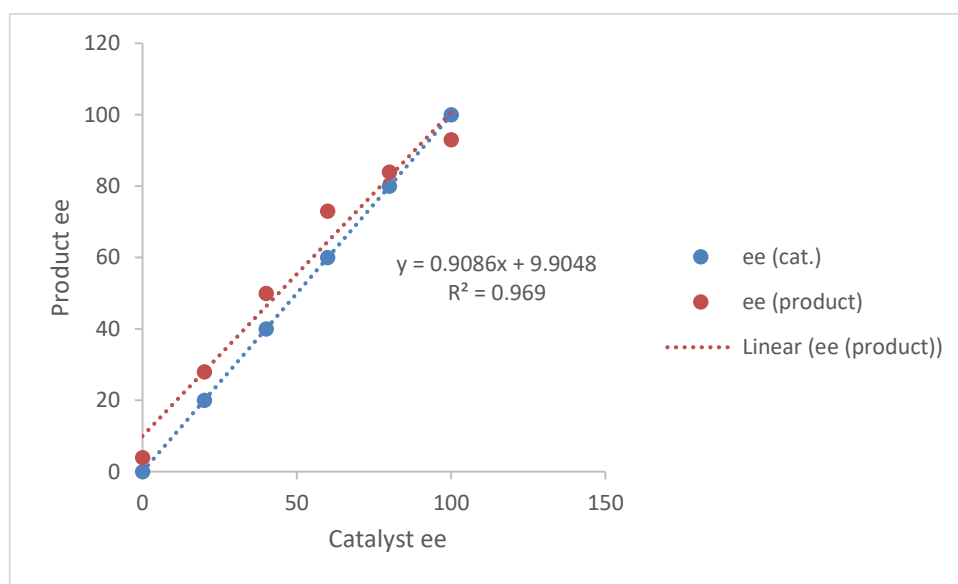

## 5. Mechanistic Study

### 5.1 DFT Calculations

#### Conformation Generation

The starting geometry for the catalyst was adapted from the crystal structure of pyridinium complex in the crystal structure with Cambridge database code CAZKEU.<sup>3</sup> It was assumed that the NH-O=P interaction present in this and all comparable crystal structures was retained and conformations of key structures were generated manually and where they yielded an optimized structure they are given below.

To study the conformational space of the bound complexes, we considered complexes with the catalyst bearing a proton on either of the two protruding phosphate oxygens (distal and proximal) and assumed a hydrogen bond with the quinoline nitrogen to be a critical interaction. Given this constraint, a full conformational exploration of both enantiomers of the product complex was undertaken. Two orientations of the quinoline ring were considered: one in which a secondary interaction between the the distal phosphate oxygen and the CH *peri* to the quinoline nitrogen was in place and one in which a 180° rotation about the POH...N<sub>quinoline</sub> hydrogen bond takes place. All rotamers of the CHFCH<sub>2</sub>NHPh sidechain that could be sterically accommodated by the catalyst were attempted and *i*-Pr groups at ortho positions in the catalyst were retained in their preferred conformation while the *i*-Pr at the para position was adjusted to minimise clashing with the bound species (the geom=nocrowd option in Gaussian 09<sup>4</sup> was used in order to permit the relaxation of species featuring a small amount of steric clashing).

#### Calculations involving complexes containing chiral phosphoric acids

All frequency and geometry calculations were carried out using hybrid QM/MM calculations using the ONIOM method with B3LYP functional with the 6-31G\*\* basis set for all atoms arising from aniline or quinoline and the PO<sub>4</sub>H from the catalyst, and UFF is applied to the remainder of the catalyst. Additional single-point energy calculations were carried out on the previously optimised geometries using the M06-2X functional with the 6-31G\*\* basis set employing a PCM solvation in diethyl ether and using an ultrafine grid. All calculations using the B3LYP, UFF or M06-2X functional have been performed using Gaussian 09.<sup>4</sup>

#### Calculations involving complexes not containing chiral phosphoric acids

All frequency and geometry calculations were carried out using the B3LYP functional with the 6-31G\*\* basis set. Additional single-point energy calculations were carried out on the previously optimised geometries using the M06-2X functional with the 6-31G\*\* basis set employing a PCM solvation in diethyl ether and using an ultrafine grid. All calculations using the B3LYP or M06-2X functional have been performed using Gaussian 09.<sup>4</sup>

#### Free energy calculations

Free energies are calculated from the generated electronic energies using the GoodVibes program (version 2.0.3)<sup>5</sup> with a standard state of 1M concentration and temperature of 253K.

#### Transition State Generation

All of the optimized complexes that were within 3 kcal mol<sup>-1</sup> of the complex with the lowest energy were then subjected to a scan in which the proton at the stereocentre was moved towards either, the aniline nitrogen, the nearest (proximal) O=P or the furthest (distal) O=P. Each of these scans were then



used to initiate transition state optimizations. Subsequently, the lowest energy transition state structure was the starting point for a limited exploration of each of the steps that occurs prior to the stereoselectivity-determining step.

### 5.1.1 Reaction Profile – 5a

Free energy profile comparison (ONIOM (B3LYP/6-31G\*\*:UFF), [single-point energy M06-2X/6-31G\*\*(+PCM for Et<sub>2</sub>O)]).

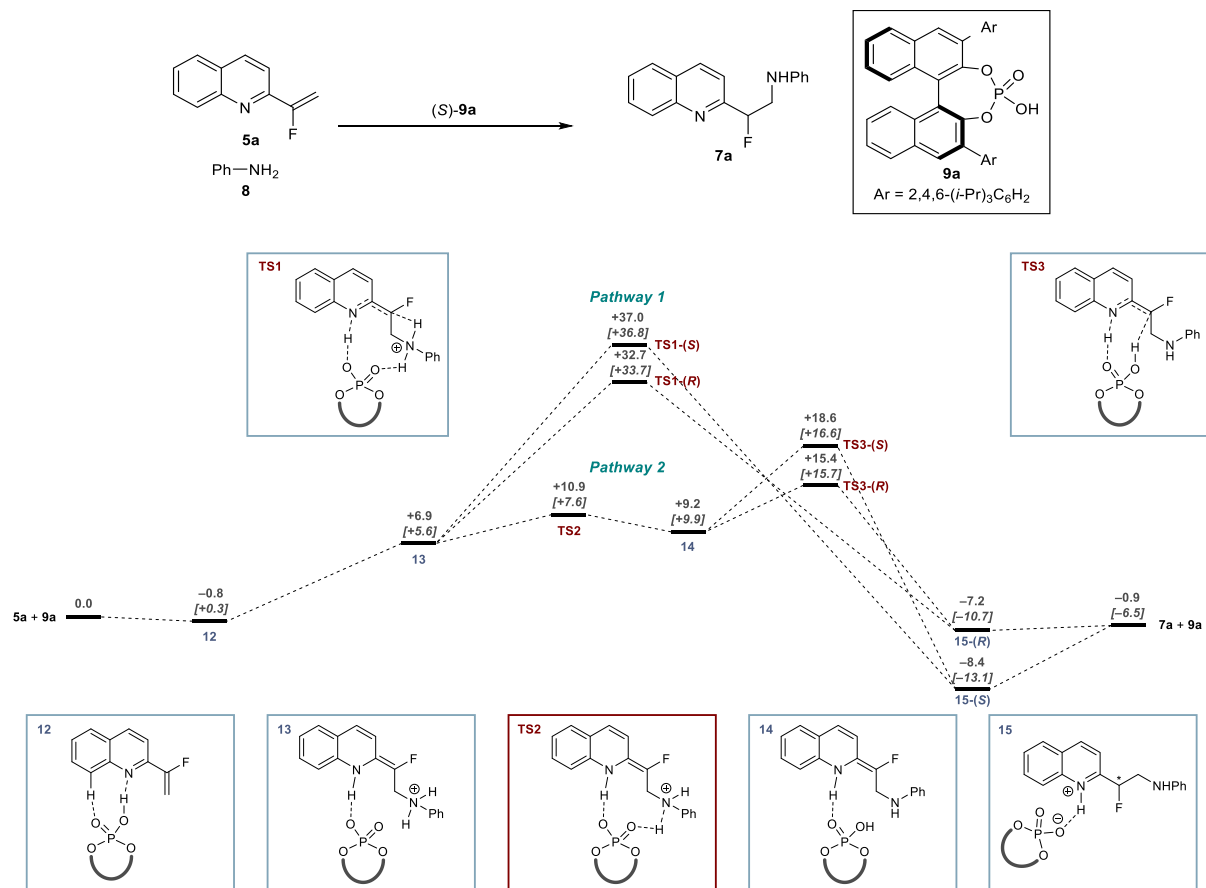

## 5.1.2 Reaction Profile – S1 (Phenyl System)

The reaction of compound **S1** studied previously was revisited with the insights provided by the calculations described in the main text.

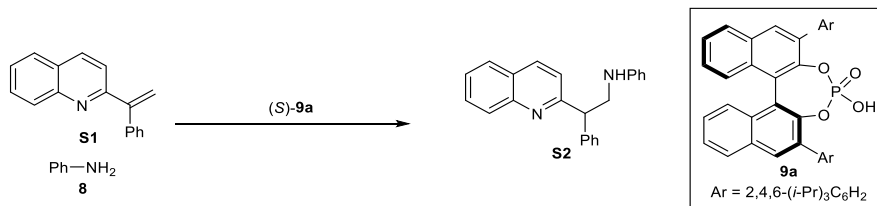

Free energy profile comparison (ONIOM (B3LYP/6-31G\*\*:(UFF), [single-point energy M06-2X/6-31G\*\*(+PCM for Et<sub>2</sub>O)]).

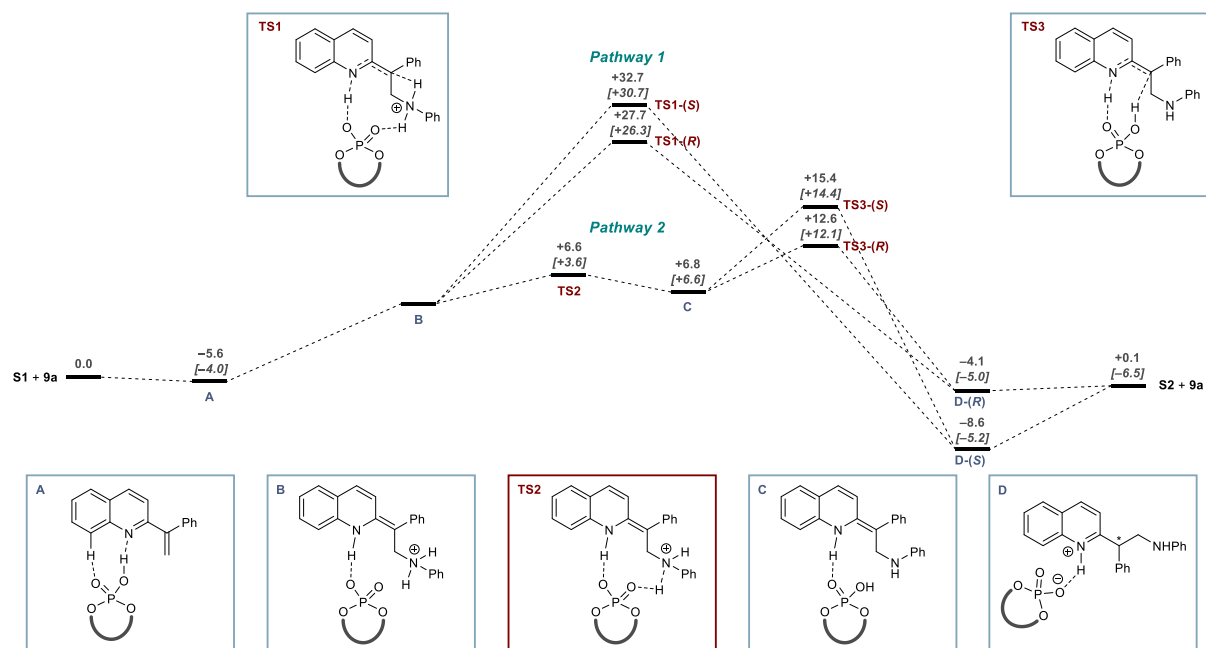

### 5.1.2 Reaction Profile – RDS Energy profile

A series of calculations, demonstrating the difference in energy for the RDS of different substrates. Free energy profile comparison (ONIOM (B3LYP/6-31G\*\*:(UFF), [single-point energy M06-2X/6-31G\*\*(+PCM for Et<sub>2</sub>O)]).

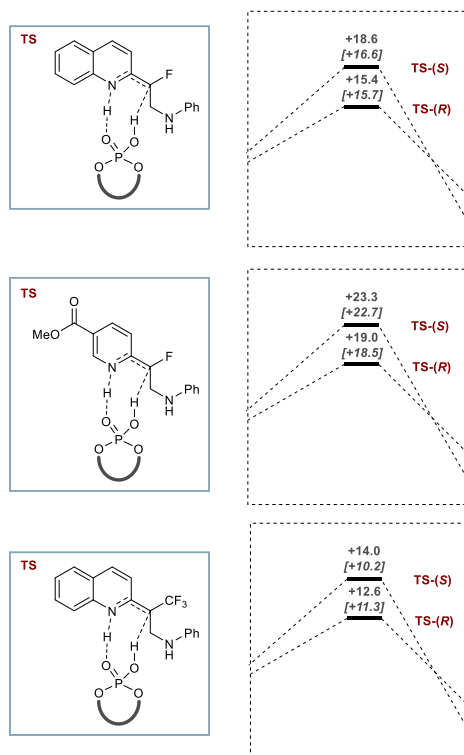

### 5.1.5 Background Reaction Profile – 5a & 10

A series of calculations, demonstrating the high energy barrier RDS for the uncatalyzed reaction, and decrease in the vinyl CF<sub>3</sub> system. Free energy profile comparison (ONIOM (B3LYP/6-31G\*\*:(UFF), [single-point energy M06-2X/6-31G\*\*(+PCM for Et<sub>2</sub>O)]).

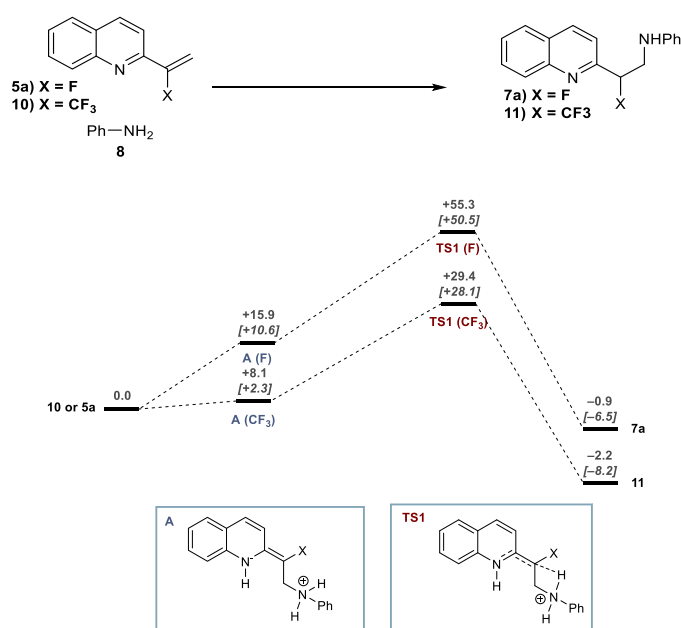

## 5.2 HRMS Study

A series of reactions were analyzed by ESI analysis. Results suggest the product **7a** has the largest affinity towards CPA **9a** as compared to aniline **8** and quinoline **5a**.

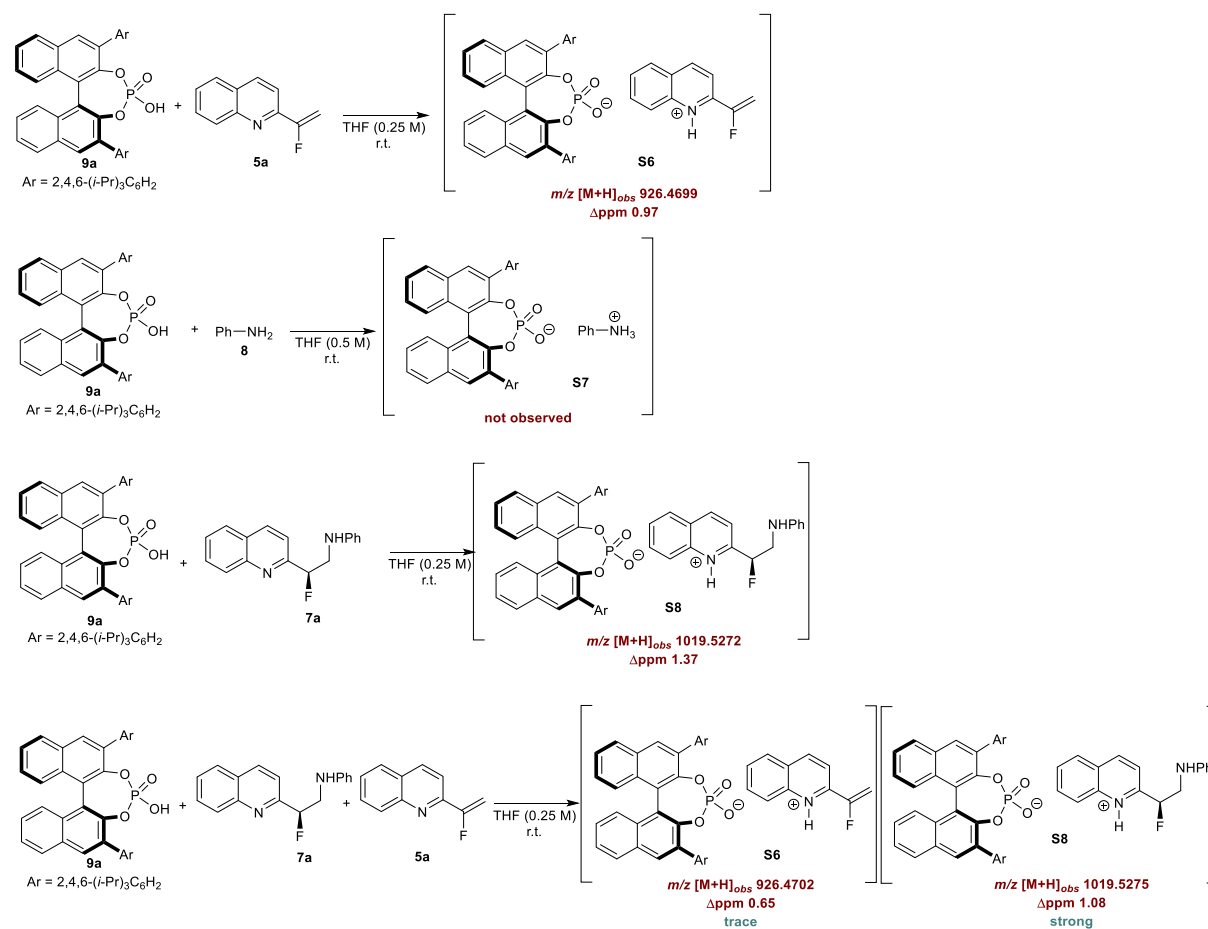

## 5.3 Kinetic Isotope Effect Study

### 5.3.1 Kinetic Isotope Effect of Aniline

Data was obtained according to General Procedure E using aniline.

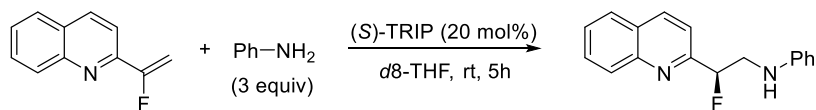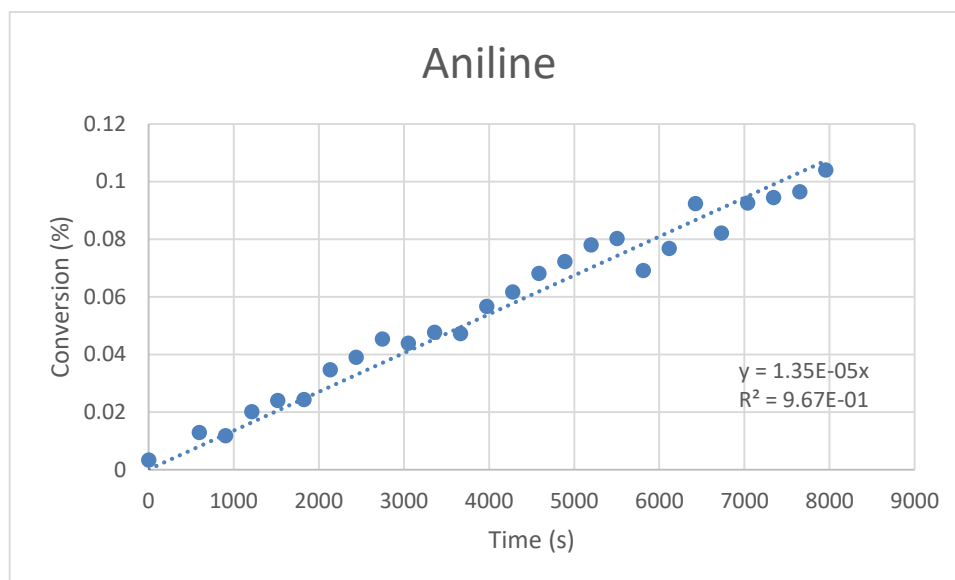

### 5.3.2 Kinetic Isotope Effect of D<sub>2</sub>-Aniline

Data was obtained according to General Procedure E using D<sub>2</sub>-aniline for 10 h.

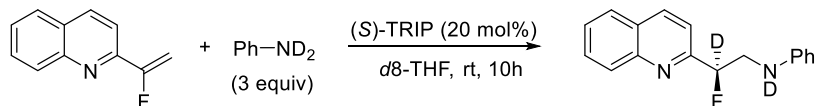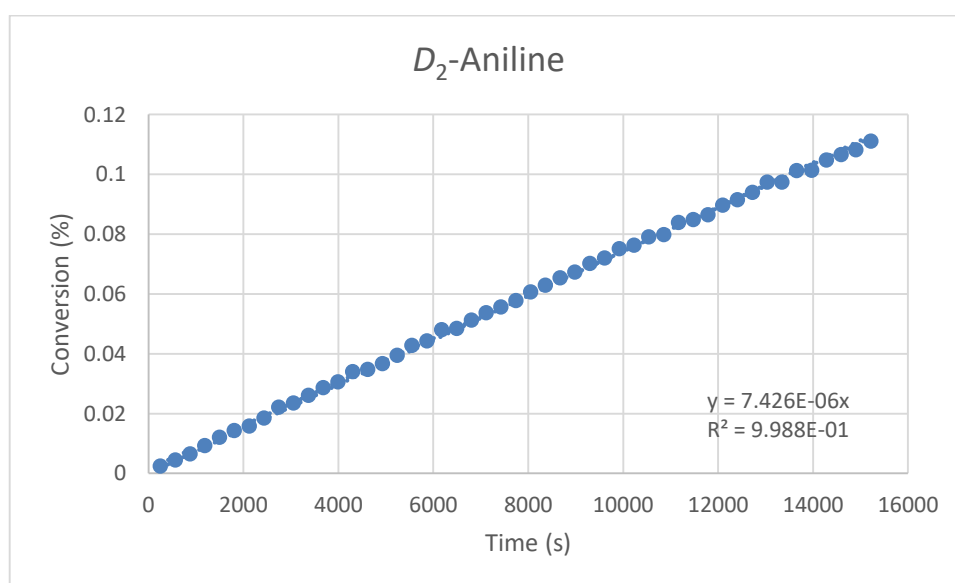

### 5.3.3 Kinetic Isotope Effect of <sup>15</sup>N-Aniline

Data was obtained according to General Procedure E using  $^{15}\text{N}$ -aniline.

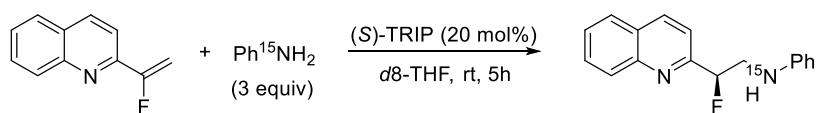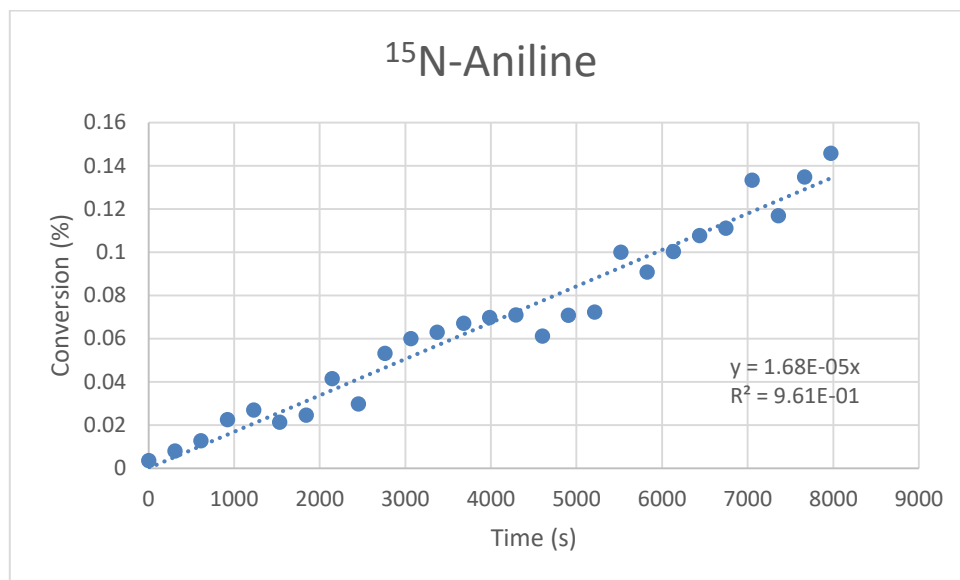

## 6. Ramachandran Plots

Ramachandran plots were computed at the M06-2X/6-31+G\*\* level of theory. Calculations were performed in Gaussian09 using the modified redundant coordinate facility with dihedral angles being moved in 15° increments. Energy in kcal mol<sup>-1</sup>.

### 6.1 Ramachandran Plot for Compound 9a

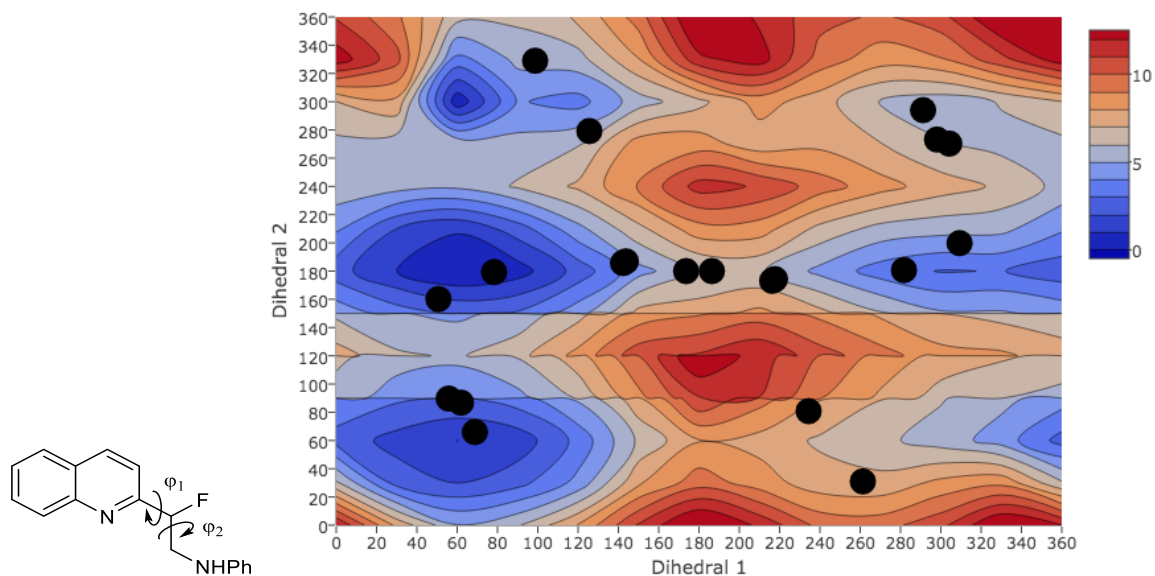

### 6.2 Ramachandran Plot for Compound 16

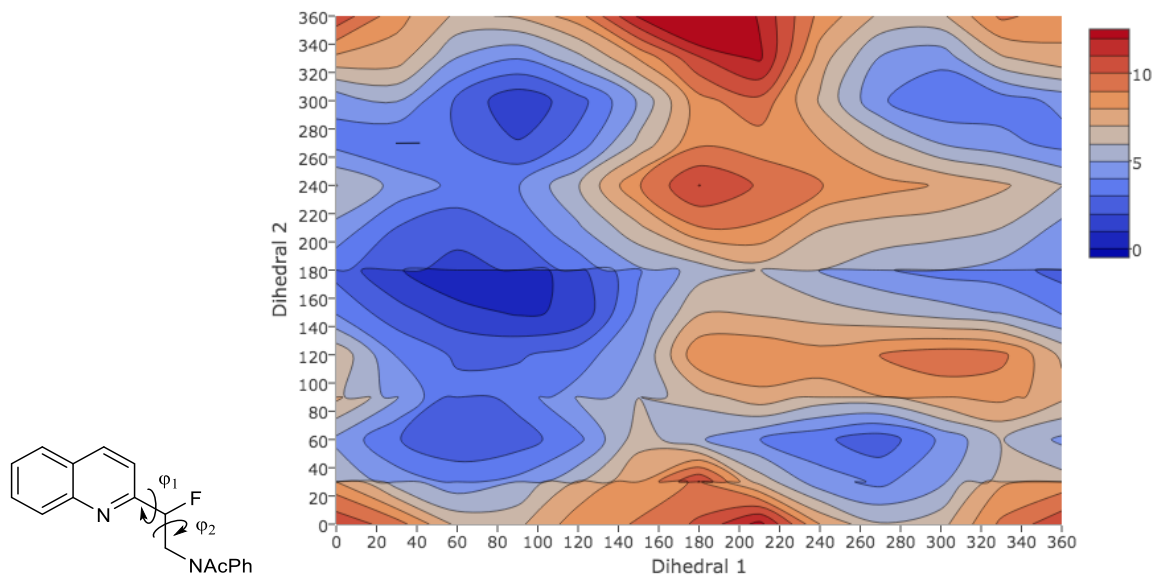

### 6.3 Ramachandran Plot for *N*-(2-(Quinolin-2-yl)ethyl)aniline

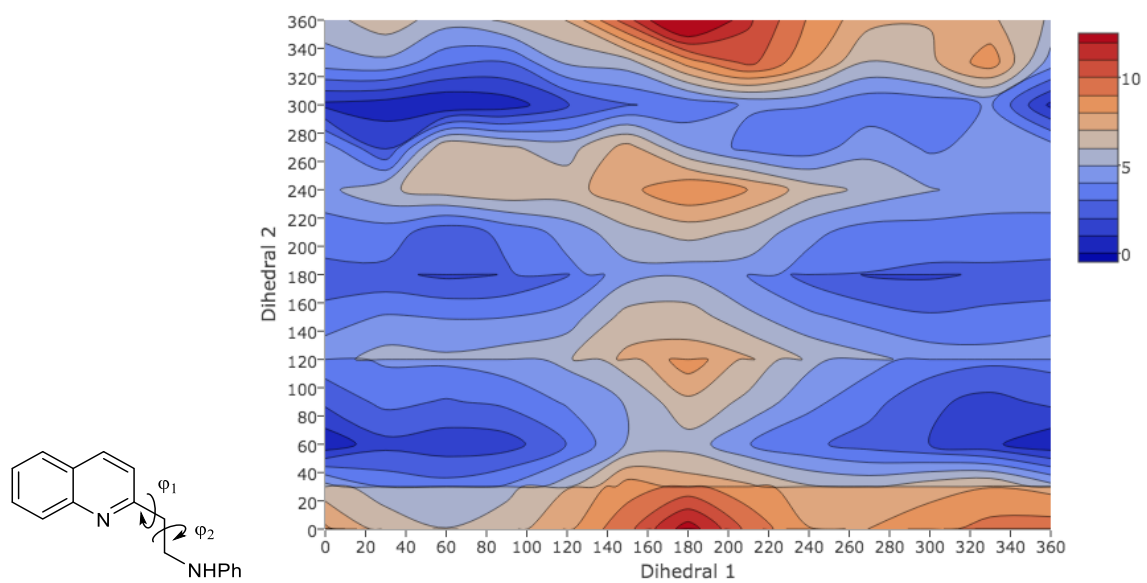



## 7. Characterization Data for Compounds

### 2-Bromo-3-methylquinoline S3

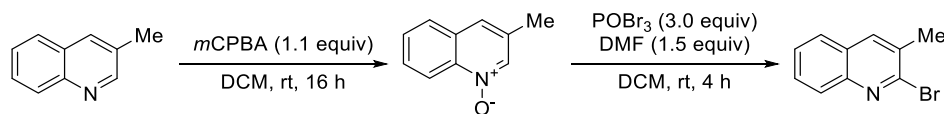

Prepared according to literature procedures.<sup>6,7</sup>

An oven-dried, 250 mL round bottomed flask was charged with 3-methylquinoline (1.34 mL, 10.0 mmol, 1.0 equiv). The vessel was sealed and purged with N<sub>2</sub>. CH<sub>2</sub>Cl<sub>2</sub> (50 mL, 0.2 M) was added to the vessel and the mixture was stirred at 0 °C for 15 min before the addition of *m*CPBA (1.91 g, 11.0 mmol, 1.1 equiv). The reaction was left to stir at rt for 16 h. The mixture was then diluted with CH<sub>2</sub>Cl<sub>2</sub> (50 mL), and washed with aq. KOH 6 M solution (3 × 50 mL). The organic layer was collected, dried over Na<sub>2</sub>SO<sub>4</sub>, filtered, and concentrated *in vacuo*.

*NB.* Calculations based upon quantitative conversion to 2-bromo-3-methylquinoline 1-oxide in the previous step. An oven-dried, 250 mL round bottomed flask was charged with the crude 3-methylquinoline *N*-oxide (10.0 mmol, 1.0 equiv) and POBr<sub>3</sub> (8.60 g, 30.0 mmol, 3.0 equiv). The vessel was sealed and purged with N<sub>2</sub>. Dry CH<sub>2</sub>Cl<sub>2</sub> (50 mL, 0.2 M) and dry DMF (1.16 mL, 1.50 mmol, 1.5 equiv) were added. The reaction was left to stir at rt for 4 h. Sat. aq. Na<sub>2</sub>SO<sub>4</sub> solution was added slowly until the pH was 7-8. The layers in the resulting mixture were separated and the aqueous was extracted with CH<sub>2</sub>Cl<sub>2</sub> (3 × 50 mL). The organic phases were combined, dried over Na<sub>2</sub>SO<sub>4</sub>, filtered, and concentrated *in vacuo*. Purification of the crude product *via* flash chromatography (silica gel, EtOAc:petroleum ether, 1:99) gave the desired product as a white solid (506 mg, 23%).

<sup>1</sup>H NMR (500 MHz, CDCl<sub>3</sub>): δ 8.00 (d, *J* = 8.5 Hz, 1H), 7.90 (s, 1H), 7.71 (d, *J* = 8.1 Hz, 1H), 7.68 – 7.62 (m, 1H), 7.58 – 7.47 (m, 1H), 2.52 (d, *J* = 1.1 Hz, 3H).

<sup>13</sup>C NMR (126 MHz, CDCl<sub>3</sub>): δ 147.1, 145.6, 137.1, 132.4, 129.6, 128.4, 127.8, 127.2, 127.0, 22.5.

Spectroscopic data in agreement with literature values.<sup>6</sup>

### 2-Bromo-6-fluoroquinoline S4

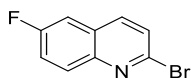

Prepared according to a literature procedure.<sup>6</sup>

An oven-dried, 10 mL microwave vial was charged with 6-fluoroquinolin-2(1*H*)-one (226 mg, 1.00 mmol, 1.0 equiv) and POBr<sub>3</sub> (56.2 mg, 1.10 mmol, 1.1 equiv). The vessel was capped and purged with N<sub>2</sub>. The mixture was heated to 140 °C for 3 h, then cooled to rt and poured over ice. The resulting precipitate was collected, washed with petroleum ether and dried *in vacuo* to give the desired product as a pale brown solid (114 mg, 50%).

<sup>1</sup>H NMR (400 MHz, CDCl<sub>3</sub>): δ 8.04 (dd, *J* = 9.2, 5.2 Hz, 1H), 7.96 (d, *J* = 8.6 Hz, 1H), 7.54 (d, *J* = 8.6 Hz, 1H), 7.50 (td, *J* = 8.8, 2.8 Hz, 1H), 7.43 (dd, *J* = 8.6, 2.8 Hz, 1H).

<sup>13</sup>C NMR (126 MHz, CDCl<sub>3</sub>): δ 160.7 (d, <sup>1</sup>*J* = 249.5 Hz), 145.7, 141.1, 137.8 (d, <sup>4</sup>*J* = 5.2 Hz), 131.3 (d, <sup>3</sup>*J* = 9.3 Hz), 127.8 (d, <sup>3</sup>*J* = 10.3 Hz), 126.7, 120.9 (d, <sup>2</sup>*J* = 25.5 Hz), 111.2 (d, <sup>2</sup>*J* = 22.2 Hz).

**<sup>19</sup>F NMR (376 MHz, CDCl<sub>3</sub>):**  $\delta$  -111.94.

Spectroscopic data in agreement with literature values.<sup>7</sup>

#### 2,6-Dibromoquinoline **S5**

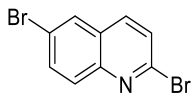

Prepared according to a literature procedure.<sup>6</sup>

An oven-dried, 10 mL microwave vial was charged with 6-bromoquinolin-2(1H)-one (251 mg, 1.13 mmol, 1.13 equiv) and POBr<sub>3</sub> (287 mg, 1.00 mmol, 1.0 equiv). The vessel was capped and purged with N<sub>2</sub>. The mixture was heated to 140 °C for 3 h, then cooled to rt and poured over ice. The resulting precipitate was collected, washed with petroleum ether and dried *in vacuo* to give the desired product as a brown solid (178 mg, 62%).

**<sup>1</sup>H NMR (500 MHz, CDCl<sub>3</sub>):**  $\delta$  7.98 (d,  $J$  = 2.2 Hz, 1H), 7.91 (dd,  $J$  = 8.7, 2.0 Hz, 2H), 7.80 (dd,  $J$  = 8.9, 2.2 Hz, 1H), 7.55 (d,  $J$  = 8.6 Hz, 1H).

**<sup>13</sup>C NMR (126 MHz, CDCl<sub>3</sub>):**  $\delta$  147.3, 142.4, 137.4, 134.2, 130.5, 129.9, 128.2, 126.9, 121.2.

Spectroscopic data in agreement with literature values.<sup>6</sup>

#### 2-(1-Fluorovinyl)quinoline **5a**

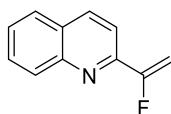

Prepared according to General Procedure C using 2-bromoquinoline (207 mg, 1.00 mmol, 1.0 equiv), (1-fluorovinyl)(methyl)diphenylsilane (356 mg, 1.50 mmol, 1.5 equiv), Pd(PPh<sub>3</sub>)<sub>4</sub> (59.0 mg, 0.05 mmol, 5 mol%), CuI (9.7 mg, 0.05 mmol, 5 mol%), CsF (364 mg, 2.35 mmol, 2.35 equiv), and DMF (10 mL, 0.1 M). The reaction mixture was subjected to the purification outlined in the General Procedure C (silica gel, Et<sub>2</sub>O:petroleum ether, 1:99) to afford the desired product as a pale yellow oil (161 mg, 93%).

**$\nu_{\max}$  (film):** 3056, 2926, 1654, 1284, 1108, 834, 758 cm<sup>-1</sup>.

**<sup>1</sup>H NMR (400 MHz, CDCl<sub>3</sub>):**  $\delta$  8.13 (d,  $J$  = 8.6 Hz, 1H), 8.10 (d,  $J$  = 8.5 Hz, 1H), 7.81 (dd,  $J$  = 8.1, 0.9 Hz, 1H), 7.73 (ddd,  $J$  = 8.4, 6.9, 1.4 Hz, 1H), 7.69 (dd,  $J$  = 8.6, 1.2 Hz, 1H), 7.54 (ddd,  $J$  = 8.1, 6.9, 1.1 Hz, 1H), 5.87 (dd,  $^3J_{\text{HF}}$  = 48.6 Hz,  $^2J_{\text{HH}}$  = 2.9 Hz, 1H), 5.14 (dd,  $^3J_{\text{HF}}$  = 16.4 Hz,  $^2J_{\text{HH}}$  = 2.9 Hz, 1H).

**<sup>13</sup>C NMR (126 MHz, CDCl<sub>3</sub>):**  $\delta$  162.3 (d,  $^1J$  = 251.2 Hz), 150.1 (d,  $^2J$  = 35.4 Hz), 147.9 (d,  $^4J$  = 3.8 Hz), 136.9, 130.0, 129.8, 128.0, 127.6, 127.1, 116.8 (d,  $^3J$  = 4.7 Hz), 93.8 (d,  $^2J$  = 18.4 Hz).

**<sup>19</sup>F NMR (376 MHz, CDCl<sub>3</sub>):**  $\delta$  -114.28.

**HRMS (ESI):** exact mass calculated for [M+H]<sup>+</sup> (C<sub>11</sub>H<sub>9</sub>NF) requires  $m/z$  174.0714, found  $m/z$  174.0712.

### 2-(1-Fluorovinyl)-3-methylquinoline **5b**

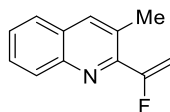

Prepared according to General Procedure C using 2-bromo-3-methylquinoline (99.5 mg, 0.45 mmol, 1.0 equiv), (1-fluorovinyl)(methyl)diphenylsilane (164 mg, 0.675 mmol, 1.5 equiv), Pd(PPh<sub>3</sub>)<sub>4</sub> (520 mg, 0.45 mmol, 1.0 equiv), CuI (85.7 mg, 0.45 mmol, 1.0 equiv), CsF (161 mg, 1.06 mmol, 2.35 equiv), and DMF (4.5 mL, 0.1 M). The reaction mixture was subjected to the purification outlined in General Procedure C (silica gel, Et<sub>2</sub>O:petroleum ether, 1:99) to afford the desired product as a pale yellow oil (75.4 mg, 90%).

$\nu_{\max}$  (film): 2361, 2342, 1655, 1493, 1447, 1327, 1273, 1184, 1138, 1065, 930, 903, 860, 791, 756, 729 cm<sup>-1</sup>.

<sup>1</sup>H NMR (500 MHz, CDCl<sub>3</sub>):  $\delta$  8.08 (dd,  $J$  = 8.4, 1.3 Hz, 1H), 7.97 (s, 1H), 7.75 (dd,  $J$  = 8.2, 1.5 Hz, 1H), 7.67 (ddd,  $J$  = 8.4, 6.8, 1.5 Hz, 1H), 7.53 (ddd,  $J$  = 8.1, 6.8, 1.2 Hz, 1H), 5.37 (dd,  $^3J_{\text{HF}}$  = 48.2 Hz,  $^2J_{\text{HH}}$  = 3.0 Hz, 1H), 5.19 (dd,  $^3J_{\text{HF}}$  = 16.8 Hz,  $^2J_{\text{HH}}$  = 3.0 Hz, 1H), 2.60 (d,  $J$  = 4.9 Hz, 3H).

<sup>13</sup>C NMR (126 MHz, CDCl<sub>3</sub>):  $\delta$  163.9 (d,  $^1J$  = 256.3 Hz), 151.2 (d,  $^2J$  = 32.3 Hz), 146.2, 146.2, 137.6, 129.6, 129.2, 128.4, 127.5, 126.8, 96.3 (d,  $^2J$  = 19.2 Hz), 20.0 (d,  $^4J$  = 7.6 Hz).

<sup>19</sup>F NMR (470 MHz, CDCl<sub>3</sub>):  $\delta$  -99.90.

HRMS (ESI): exact mass calculated for [M+H]<sup>+</sup> (C<sub>12</sub>H<sub>11</sub>FN) requires  $m/z$  188.0870, found  $m/z$  188.0866.

### 6-Fluoro-2-(1-fluorovinyl)quinoline **5c**

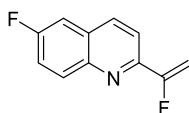

Prepared according to General Procedure C using 6-fluoro-2-bromoquinoline (150 mg, 0.664 mmol, 1.0 equiv), (1-fluorovinyl)(methyl)diphenylsilane (241 mg, 0.995 mmol, 1.5 equiv), Pd(PPh<sub>3</sub>)<sub>4</sub> (38.3 mg, 0.033 mmol, 5 mol%), CuI (6.3 mg, 0.033 mmol, 5 mol%), CsF (237 mg, 1.56 mmol, 2.35 equiv), and DMF (6.6 mL, 0.1 M). The reaction mixture was subjected to the purification outlined in General Procedure C (silica gel, Et<sub>2</sub>O:petroleum ether, 1:99) to afford the desired product as a pale yellow oil (84.0 mg, 66%).

$\nu_{\max}$  (film): 1657, 1626, 1603, 1558, 1501, 1481, 1379, 1304, 1285, 1244, 1221, 1144, 1101, 916, 866, 829 cm<sup>-1</sup>.

<sup>1</sup>H NMR (400 MHz, CDCl<sub>3</sub>):  $\delta$  8.12 (d,  $J$  = 8.7 Hz, 1H), 8.08 (dd,  $J$  = 9.3, 5.3 Hz, 1H), 7.68 (d,  $J$  = 8.7 Hz, 1H), 7.49 (td,  $J$  = 8.9, 2.8 Hz, 1H), 7.40 (dd,  $J$  = 8.7, 2.9 Hz, 1H), 5.84 (dd,  $^3J_{\text{HF}}$  = 48.6 Hz,  $^2J_{\text{HH}}$  = 3.0 Hz, 1H), 5.13 (dd,  $^3J_{\text{HF}}$  = 16.4 Hz,  $^2J_{\text{HH}}$  = 3.1 Hz, 1H).

**<sup>13</sup>C NMR (126 MHz, CDCl<sub>3</sub>):** δ 162.0 (d, <sup>1</sup>J = 251.0 Hz), 160.8 (d, <sup>1</sup>J = 249.4 Hz), 149.6, (dd, <sup>2</sup>J = 35.8, 3.1 Hz), 145.0 (d, <sup>4</sup>J = 4.0 Hz), 136.4 (d, <sup>3</sup>J = 6.6 Hz), 132.3 (d, <sup>3</sup>J = 9.1 Hz), 128.6 (d, <sup>3</sup>J = 10.1 Hz), 120.5 (d, <sup>2</sup>J = 26.0 Hz), 117.6 (d, <sup>4</sup>J = 4.7 Hz), 110.6 (d, <sup>2</sup>J = 21.8 Hz), 93.8 (d, <sup>2</sup>J = 18.5 Hz).

**<sup>19</sup>F NMR (376 MHz, CDCl<sub>3</sub>):** δ -112.23, -114.42.

**HRMS (ESI):** exact mass calculated for [M+H]<sup>+</sup> (C<sub>11</sub>H<sub>8</sub>F<sub>2</sub>N) requires *m/z* 192.0619, found *m/z* 192.0618.

#### 6-Bromo-2-(1-fluorovinyl)quinoline **5d**

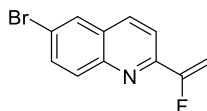

Prepared according to General Procedure C using 2,6-dibromoquinoline (259 mg, 0.90 mmol, 1.0 equiv), (1-fluorovinyl)(methyl)diphenylsilane (328 mg, 1.38 mmol, 1.5 equiv), Pd(PPh<sub>3</sub>)<sub>4</sub> (52.0 mg, 0.045 mmol, 5 mol%), CuI (8.6 mg, 0.045 mmol, 5 mol%), CsF (322 mg, 2.12 mmol, 2.35 equiv), and DMF (9 mL, 0.1 M). The reaction mixture was subjected to the purification outlined in General Procedure C (silica gel, Et<sub>2</sub>O:petroleum ether, 1:99) to afford the desired product as a pale yellow solid (183 mg, 81%).

**ν<sub>max</sub> (film):** 1659, 1595, 1489, 1283, 1190, 1107, 920, 874, 827 cm<sup>-1</sup>.

**<sup>1</sup>H NMR (400 MHz, CDCl<sub>3</sub>):** δ 8.11 (d, *J* = 8.6 Hz, 1H), 7.97 (d, *J* = 2.2 Hz, 1H), 7.95 (d, *J* = 9.0 Hz, 1H), 7.78 (dd, *J* = 9.0, 2.2 Hz, 1H), 7.70 (dd, *J* = 8.7, 1.3 Hz, 1H), 5.87 (dd, <sup>3</sup>J<sub>HF</sub> = 48.5 Hz, <sup>2</sup>J<sub>HH</sub> = 3.1 Hz, 1H), 5.16 (dd, <sup>3</sup>J<sub>HF</sub> = 16.3 Hz, <sup>2</sup>J<sub>HH</sub> = 3.1 Hz, 1H).

**<sup>13</sup>C NMR (126 MHz, CDCl<sub>3</sub>):** δ 161.9 (d, <sup>1</sup>J = 251.1 Hz), 150.5 (d, <sup>2</sup>J = 35.6 Hz), 146.5 (d, <sup>4</sup>J = 4.0 Hz), 136.1, 133.7, 131.5, 129.7, 129.1, 121.2, 117.8 (d, <sup>3</sup>J = 4.6 Hz), 94.4 (d, <sup>2</sup>J = 18.3 Hz).

**<sup>19</sup>F NMR (376 MHz, CDCl<sub>3</sub>):** δ -114.60.

**HRMS (ESI):** exact mass calculated for [M+H]<sup>+</sup> (C<sub>11</sub>H<sub>8</sub>BrFN) requires *m/z* 251.9819, found *m/z* 251.9816.

#### 4-Bromo-2-(1-fluorovinyl)quinoline **5e**

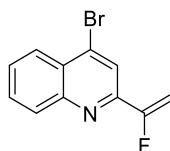

Prepared according to General Procedure C using 2,4-dibromoquinoline (259 mg, 0.90 mmol, 1.0 equiv), (1-fluorovinyl)(methyl)diphenylsilane (328 mg, 1.35 mmol, 1.5 equiv), Pd(PPh<sub>3</sub>)<sub>4</sub> (52.0 mg, 0.045 mmol, 5 mol%), CuI (8.6 mg, 0.045 mmol, 5 mol%), CsF (322 mg, 2.12 mmol, 2.35 equiv), and DMF (9 mL, 0.1 M). The reaction mixture was subjected to the purification outlined in General Procedure C (silica gel, Et<sub>2</sub>O:petroleum ether, 1:99) to afford the desired product as a pale yellow solid (105 mg, 42%).

**ν<sub>max</sub> (film):** 2357, 1578, 1547, 1491, 1404, 1339, 1265, 1251, 1148, 1105, 928 cm<sup>-1</sup>.

**<sup>1</sup>H NMR (500 MHz, CDCl<sub>3</sub>):** δ 8.12 (dd, *J* = 8.5, 1.4 Hz, 1H), 8.05 (dd, *J* = 8.5, 1.2 Hz, 1H), 7.94 (d, *J* = 1.2 Hz, 1H), 7.74 (ddd, *J* = 8.4, 6.8, 1.4 Hz, 1H), 7.60 (ddd, *J* = 8.2, 6.8, 1.2 Hz, 1H), 5.89 (dd, <sup>3</sup>*J*<sub>HF</sub> = 48.4 Hz, <sup>2</sup>*J*<sub>HH</sub> = 3.1 Hz, 1H), 5.16 (dd, <sup>3</sup>*J*<sub>HF</sub> = 16.2 Hz, <sup>2</sup>*J*<sub>HH</sub> = 3.1 Hz, 1H).

**<sup>13</sup>C NMR (126 MHz, CDCl<sub>3</sub>):** δ 161.0 (d, <sup>1</sup>*J* = 251.5 Hz), 149.8 (d, <sup>2</sup>*J* = 36.1 Hz), 148.3 (d, <sup>4</sup>*J* = 4.0 Hz), 135.0 (d, <sup>4</sup>*J* = 1.7 Hz), 130.9, 130.2, 128.3, 127.5, 126.7, 120.9 (d, <sup>3</sup>*J* = 5.1 Hz), 94.7 (d, <sup>2</sup>*J* = 17.9 Hz).

**<sup>19</sup>F NMR (470 MHz, CDCl<sub>3</sub>):** δ -114.71.

**HRMS (ESI):** exact mass calculated for [M+H]<sup>+</sup> (C<sub>11</sub>H<sub>8</sub>BrFN) requires *m/z* 251.9819, found *m/z* 251.9817.

#### 2-(1-Fluorovinyl)quinoxaline **5f**

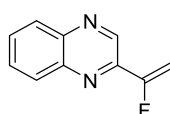

Prepared according to General Procedure C using 2-bromoquinoxaline (174 mg, 1.00 mmol, 1.0 equiv), (1-fluorovinyl)(methyl)diphenylsilane (363 mg, 1.50 mmol, 1.5 equiv), Pd(PPh<sub>3</sub>)<sub>4</sub> (57.8 mg, 0.05 mmol, 5 mol%), CuI (6.6 mg, 0.05 mmol, 5 mol%), CsF (448 mg, 2.35 mmol, 2.35 equiv), and DMF (10 mL, 0.1 M). The reaction mixture was subjected to the purification outlined in General Procedure C (silica gel, Et<sub>2</sub>O:petroleum ether, 1:99) to afford the desired product as a pale yellow solid (158 mg, 91%).

**ν<sub>max</sub> (film):** 1655, 1506, 1489, 1364, 1341, 1105, 968, 924, 874, 764, 743 cm<sup>-1</sup>.

**<sup>1</sup>H NMR (400 MHz, CDCl<sub>3</sub>):** δ 9.13 (s, 1H), 8.16 – 8.07 (m, 2H), 7.87 – 7.74 (m, 2H), 5.92 (dd, <sup>3</sup>*J*<sub>HF</sub> = 48.2 Hz, <sup>2</sup>*J*<sub>HH</sub> = 3.4 Hz, 1H), 5.27 (dd, <sup>3</sup>*J*<sub>HF</sub> = 16.5 Hz, <sup>2</sup>*J*<sub>HH</sub> = 3.4 Hz, 1H).

**<sup>13</sup>C NMR (126 MHz, CDCl<sub>3</sub>):** δ 160.7 (d, <sup>1</sup>*J* = 250.8 Hz), 145.0 (d, <sup>2</sup>*J* = 34.0 Hz), 142.6, 141.9, 141.3 (d, <sup>3</sup>*J* = 5.3 Hz), 130.9, 130.7, 129.8, 129.4, 95.9 (d, <sup>2</sup>*J* = 17.3 Hz).

**<sup>19</sup>F NMR (376 MHz, CDCl<sub>3</sub>):** δ -116.24.

**HRMS (ESI):** exact mass calculated for [M+H]<sup>+</sup> (C<sub>10</sub>H<sub>8</sub>FN<sub>2</sub>) requires *m/z* 175.0666, found *m/z* 175.0665.

#### 2-(1-Fluorovinyl)benzo[d]thiazole **5g**

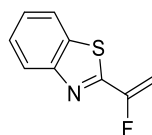

Prepared according to General Procedure C using 2-Bromobenzo[d]thiazole (214 mg, 1.00 mmol, 1.0 equiv), (1-fluorovinyl)(methyl)diphenylsilane (356 mg, 1.50 mmol, 1.5 equiv), Pd(PPh<sub>3</sub>)<sub>4</sub> (1.16 g, 1.00 mmol, 1.0 equiv), CuI (132 mg, 1.00 mmol, 1.0 equiv), CsF (364 mg, 2.40 mmol, 2.4 equiv), and DMF (10 mL, 0.1 M). The reaction mixture was subjected to the purification outlined in General Procedure C (silica gel, Et<sub>2</sub>O:petroleum ether, 1:99) to afford the desired product as a pale yellow solid (73.8 mg, 42%).

$\nu_{\max}$  (film): 2955, 2926, 2853, 1647, 1558, 1435, 1314, 1290, 1261, 1092, 760, 729, 700  $\text{cm}^{-1}$ .

$^1\text{H NMR}$  (500 MHz,  $\text{CDCl}_3$ ):  $\delta$  8.08 (d,  $J = 8.2$  Hz, 1H), 7.92 (d,  $J = 8.0$  Hz, 1H), 7.64 – 7.36 (m, 3H), 5.74 (dd,  $^3J_{\text{HF}} = 47.1$  Hz,  $^2J_{\text{HH}} = 3.7$  Hz, 1H), 5.21 (dd,  $^3J_{\text{HF}} = 15.5$  Hz,  $^2J_{\text{HH}} = 3.8$  Hz, 1H).

$^{13}\text{C NMR}$  (126 MHz,  $\text{CDCl}_3$ ):  $\delta$  159.9 (d,  $^2J = 39.3$  Hz), 157.3 (d,  $^1J = 247.7$  Hz), 153.5 (d,  $^4J = 2.0$  Hz), 135.0, 126.8, 126.1, 123.8, 121.9, 95.5 (d,  $^2J = 17.2$  Hz).

$^{19}\text{F NMR}$  (470 MHz,  $\text{CDCl}_3$ ):  $\delta$  -106.57.

**HRMS (ESI)**: exact mass calculated for  $[\text{M}+\text{H}]^+$  ( $\text{C}_9\text{H}_7\text{FNS}$ ) requires  $m/z$  180.0278, found  $m/z$  180.0277.

#### Methyl 6-(1-fluorovinyl)nicotinate **5h**

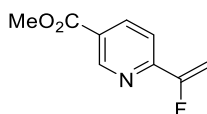

Prepared according to General Procedure C using 6-bromonicotinate (216 mg, 1.00 mmol, 1.0 equiv), (1-fluorovinyl)(methyl)diphenylsilane (356 mg, 1.50 mmol, 1.5 equiv),  $\text{Pd}(\text{PPh}_3)_4$  (59.0 mg, 0.05 mmol, 5 mol%),  $\text{CuI}$  (9.7 mg, 0.05 mmol, 5 mol%),  $\text{CsF}$  (364 mg, 2.40 mmol, 2.4 equiv), and DMF (10 mL, 0.1 M). The reaction mixture was subjected to the purification outlined in General Procedure C (silica gel,  $\text{Et}_2\text{O}$ :petroleum ether, 1:99) to afford the desired product as a pale yellow solid (164 mg, 91%).

$\nu_{\max}$  (film): 1722, 1655, 1593, 1560, 1437, 1366, 1287, 1273, 1196, 1130, 1101, 1022, 920, 897, 858, 789, 733  $\text{cm}^{-1}$ .

$^1\text{H NMR}$  (400 MHz,  $\text{CDCl}_3$ ):  $\delta$  9.14 – 9.13 (m, 1H), 8.31 (dd,  $J = 8.2, 2.1$  Hz, 1H), 7.59 (d,  $J = 7.9$  Hz, 1H), 5.84 (dd,  $^3J_{\text{HF}} = 48.5$  Hz,  $^2J_{\text{HH}} = 2.9$  Hz, 1H), 5.11 (dd,  $^3J_{\text{HF}} = 16.3$  Hz,  $^2J_{\text{HH}} = 2.9$  Hz, 1H), 3.94 (s, 3H).

$^{13}\text{C NMR}$  (126 MHz,  $\text{CDCl}_3$ ):  $\delta$  165.4, 161.3 (d,  $^1J = 249.3$  Hz), 153.3 (d,  $^2J = 36.8$  Hz), 150.8 (d,  $^4J = 4.5$  Hz), 138.2 (d,  $^4J = 1.8$  Hz), 125.8, 118.2 (d,  $^3J = 4.5$  Hz), 95.2 (d,  $^2J = 17.6$  Hz), 52.6.

$^{19}\text{F NMR}$  (376 MHz,  $\text{CDCl}_3$ ):  $\delta$  -115.94.

**HRMS (ESI)**: exact mass calculated for  $[\text{M}+\text{H}]^+$  ( $\text{C}_9\text{H}_9\text{FNO}_2$ ) requires  $m/z$  182.0612, found  $m/z$  182.0610.

#### 1-(1-Fluorovinyl)isoquinoline **5i**

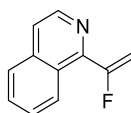

Prepared according to General Procedure C using 1-bromoisoquinoline (207 mg, 1.00 mmol, 1.0 equiv), (1-fluorovinyl)(methyl)diphenylsilane (356 mg, 1.50 mmol, 1.5 equiv),  $\text{Pd}(\text{PPh}_3)_4$  (59.0 mg, 0.05 mmol, 5 mol%),  $\text{CuI}$  (9.7 mg, 0.05 mmol, 5 mol%),  $\text{CsF}$  (364 mg, 2.40 mmol, 2.4 equiv), and DMF (10 mL, 0.1 M). The reaction mixture was subjected to the purification outlined in General Procedure C (silica gel,  $\text{Et}_2\text{O}$ :petroleum ether, 1:99) to afford the desired product as a pale yellow oil (171 mg, 99%).

$\nu_{\max}$  (film): 1657, 1622, 1584, 1557, 1393, 1298, 1250, 1215, 1175, 1153, 1140, 926, 858, 827, 748, 685, 579  $\text{cm}^{-1}$ .

$^1\text{H NMR}$  (400 MHz,  $\text{CDCl}_3$ ):  $\delta$  8.53 (d,  $J = 5.6$  Hz, 1H), 8.37 (d,  $J = 8.6$  Hz, 1H), 7.83 (d,  $J = 8.2$  Hz, 1H), 7.76 – 7.65 (m, 2H), 7.61 (ddd,  $J = 8.2, 6.9, 1.2$  Hz, 1H), 5.50 – 5.19 (m, 2H).

$^{13}\text{C NMR}$  (126 MHz,  $\text{CDCl}_3$ ):  $\delta$  163.0 (d,  $^1J = 256.4$  Hz), 151.0 (d,  $^2J = 31.1$  Hz), 141.9, 136.9, 130.5, 128.0 (d,  $^4J = 1.9$  Hz), 127.2, 126.3 (d,  $^3J = 9.7$  Hz), 126.0 (d,  $^4J = 2.3$  Hz), 122.2, 97.3 (d,  $^2J = 19.2$  Hz).

$^{19}\text{F NMR}$  (376 MHz,  $\text{CDCl}_3$ ):  $\delta$  -97.19.

**HRMS (ESI):** exact mass calculated for  $[\text{M}+\text{H}]^+$  ( $\text{C}_{11}\text{H}_9\text{FN}$ ) requires  $m/z$  174.0714, found  $m/z$  174.0710.

#### 4-(1-Fluorovinyl)quinoline **5j**

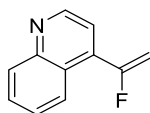

Prepared according to General Procedure C using 4-bromoquinoline (208 mg, 1.00 mmol, 1.0 equiv), (1-fluorovinyl)(methyl)diphenylsilane (356 mg, 1.50 mmol, 1.5 equiv),  $\text{Pd}(\text{PPh}_3)_4$  (57.8 mg, 0.05 mmol, 5 mol%),  $\text{CuI}$  (9.7 mg, 0.05 mmol, 5 mol%),  $\text{CsF}$  (364 mg, 2.40 mmol, 2.4 equiv), and DMF (10 mL, 0.1 M). The reaction mixture was subjected to the purification outlined in General Procedure C (silica gel,  $\text{Et}_2\text{O}$ :petroleum ether, 1:99) to afford the desired product as a pale yellow oil (82.1 mg, 47%).

*NB.* Due to the reactive nature of this compound, an analytically pure sample was not obtained, data reported as observed. The compound was used directly in the next step.

$\nu_{\max}$  (film): 2959, 2928, 2870, 1659, 1578, 1558, 1508, 1493, 1462, 1362, 1315, 1282, 1258, 1180, 1153, 926, 849, 764  $\text{cm}^{-1}$ .

$^1\text{H NMR}$  (400 MHz,  $\text{CDCl}_3$ ):  $\delta$  8.93 (d,  $J = 4.5$  Hz, 1H), 8.23 – 8.15 (m, 2H), 7.79 – 7.73 (m, 1H), 7.67 – 7.58 (m, 1H), 7.49 (dd,  $J = 4.4, 1.1$  Hz, 1H), 5.30 (dd,  $^3J_{\text{HF}} = 16.7$  Hz,  $^2J_{\text{HH}} = 3.4$  Hz, 1H), 5.09 (dd,  $^3J_{\text{HF}} = 47.9$  Hz,  $^2J_{\text{HH}} = 3.4$  Hz, 1H).

$^{13}\text{C NMR}$  (126 MHz,  $\text{CDCl}_3$ ):  $\delta$  162.5, 160.5, 149.9, 149.9, 148.9, 148.7, 138.5, 138.3, 134.5, 134.1, 130.6, 130.1, 129.9, 128.1, 127.6, 127.0, 125.4, 125.4, 125.3, 125.1, 120.4, 97.7, 97.5, 85.5, 85.1, 82.9. *NB.*  $J_{\text{CF}}$  not indicated due to overlap of impurities.

$^{19}\text{F NMR}$  (376 MHz,  $\text{CDCl}_3$ ):  $\delta$  -92.69.

**HRMS (ESI):** exact mass calculated for  $[\text{M}+\text{H}]^+$  ( $\text{C}_{11}\text{H}_9\text{FN}$ ) requires  $m/z$  174.0714, found  $m/z$  174.0709.

#### 8-Chloro-2-(1-fluorovinyl)quinoline **5k**

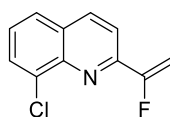

Prepared according to General Procedure C using 2-bromo-8-chloroquinoline (121 mg, 0.50 mmol, 1.0 equiv), (1-fluorovinyl)(methyl)diphenylsilane (182 mg, 0.75 mmol, 1.5 equiv), Pd(PPh<sub>3</sub>)<sub>4</sub> (57.8 mg, 0.50 mmol, 1.0 equiv), CuI (6.6 mg, 0.50 mmol, 1.0 equiv), CsF (224 mg, 1.18 mmol, 2.35 equiv), and DMF (10 mL, 0.1 M). The reaction mixture was subjected to the purification outlined in General Procedure C (silica gel, Et<sub>2</sub>O:petroleum ether, 1:99) to afford the desired product as a white solid (42.0 mg, 40%).

**$\nu_{\max}$  (film):** 1655, 1595, 1499, 1425, 1312, 1287, 1206, 1123, 989, 841, 758, 669 cm<sup>-1</sup>.

**<sup>1</sup>H NMR (400 MHz, CDCl<sub>3</sub>):**  $\delta$  8.20 (d,  $J$  = 8.6 Hz, 1H), 7.82 (dd,  $J$  = 7.5, 1.3 Hz, 1H), 7.72 (ddd,  $J$  = 8.1, 6.8, 1.4 Hz, 2H), 7.43 (dd,  $J$  = 8.2, 7.4 Hz, 1H), 6.06 (dd,  $^3J_{\text{HF}}$  = 48.5 Hz,  $^2J_{\text{HH}}$  = 2.9 Hz, 1H), 5.17 (dd,  $^3J_{\text{HF}}$  = 16.0 Hz,  $^2J_{\text{HH}}$  = 2.9 Hz, 1H).

**<sup>13</sup>C NMR (126 MHz, CDCl<sub>3</sub>):**  $\delta$  161.9 (d,  $^1J$  = 250.7 Hz), 150.60 (d,  $^2J$  = 37.5 Hz), 144.1 (d,  $^4J$  = 4.5 Hz), 137.6, 133.9, 130.2, 129.2, 126.9, 126.7, 117.5 (d,  $^3J$  = 4.4 Hz), 94.7 (d,  $^2J$  = 17.6 Hz).

**<sup>19</sup>F NMR (376 MHz, CDCl<sub>3</sub>):**  $\delta$  -115.61.

**HRMS (ESI):** exact mass calculated for [M+H]<sup>+</sup> (C<sub>11</sub>H<sub>8</sub>ClFN) requires  $m/z$  208.0324, found  $m/z$  208.0320.

(*R*)-*N*-(2-Fluoro-2-(quinolin-2-yl)ethyl)aniline **7a**

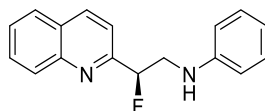

Prepared according to General Procedure A using 2-(1-fluorovinyl)quinoline (17.3 mg, 0.10 mmol, 1.0 equiv), aniline (27  $\mu$ L, 0.30 mmol, 3.0 equiv), (*S*)-TRIP catalyst (15.1 mg, 0.02 mmol, 20 mol%), and THF (200  $\mu$ L, 0.5 M). The reaction mixture was subjected to the purification outlined in General Procedure A (silica gel, EtOAc:petroleum ether, 5:95 to 10:90) to afford the desired product as a pale yellow solid (21.8 mg, 82%).

**$\nu_{\max}$  (film):** 3406 (br), 3051, 3019, 2926, 2846, 1600, 1504, 1061, 751 cm<sup>-1</sup>.

**<sup>1</sup>H NMR (500 MHz, CDCl<sub>3</sub>):**  $\delta$  8.24 (d,  $J$  = 8.5 Hz, 1H), 8.11 (d,  $J$  = 8.5 Hz, 1H), 7.85 (d,  $J$  = 8.2 Hz, 1H), 7.79 – 7.71 (m, 1H), 7.64 (dd,  $J$  = 8.5, 1.2 Hz, 1H), 7.60 – 7.54 (m, 1H), 7.23 – 7.15 (m, 2H), 6.79 – 6.70 (m, 3H), 5.91 (ddd,  $^2J_{\text{HF}}$  = 48.7 Hz,  $J$  = 7.3, 3.7 Hz, 1H), 3.95 (ddd,  $^3J_{\text{HF}}$  = 26.3 Hz,  $^2J_{\text{HH}}$  = 14.0 Hz,  $J$  = 3.8 Hz, 1H), 3.73 (ddd,  $^3J_{\text{HF}}$  = 19.7 Hz,  $^2J_{\text{HH}}$  = 14.0 Hz,  $J$  = 7.3 Hz, 1H).

**<sup>13</sup>C NMR (126 MHz, CDCl<sub>3</sub>):**  $\delta$  158.1 (d,  $^2J$  = 24.5 Hz), 147.6, 147.5, 137.3, 130.1, 129.5, 129.3, 127.9, 127.9, 127.0, 118.2, 117.9 (d,  $^3J$  = 6.7 Hz), 113.5, 93.4 (d,  $^1J$  = 174.8 Hz), 48.6 (d,  $^2J$  = 22.5 Hz).

**<sup>19</sup>F NMR (376 MHz, CDCl<sub>3</sub>):**  $\delta$  -191.33.

**HRMS (NSI):** exact mass calculated for [M+H]<sup>+</sup> (C<sub>17</sub>H<sub>16</sub>N<sub>2</sub>F) requires  $m/z$  267.1292, found  $m/z$  267.1293.

The enantiomeric purity of the product was determined by HPLC analysis: 96:4 e.r. (Chiralpak IA, hexane/*i*-PrOH = 90/10, flow rate 0.5 mL/min,  $\lambda$  = 250 nm),  $t_r$  (major) = 23.1 min,  $t_r$  (minor) = 25.2 min;



$[\alpha]_D^{23} = +21.7$  (c 1.01, CHCl<sub>3</sub>).

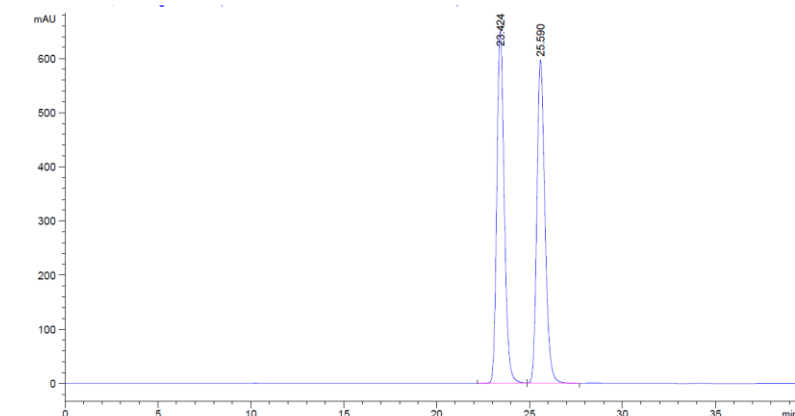

=====  
Area Percent Report  
=====

Sorted By : Signal  
Multiplier : 1.0000  
Dilution : 1.0000  
Use Multiplier & Dilution Factor with ISTDs

Signal 1: VWD1 A, Wavelength=250 nm

| Peak # | RetTime [min] | Type | Width [min] | Area [mAU*s] | Height [mAU] | Area %  |
|--------|---------------|------|-------------|--------------|--------------|---------|
| 1      | 23.424        | BB   | 0.4287      | 1.80602e4    | 650.49353    | 50.0453 |
| 2      | 25.590        | BB   | 0.4661      | 1.80275e4    | 596.60730    | 49.9547 |

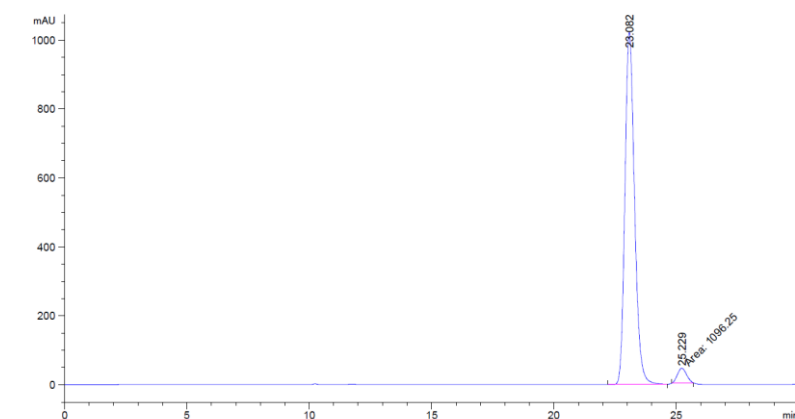

=====  
Area Percent Report  
=====

Sorted By : Signal  
Multiplier : 1.0000  
Dilution : 1.0000  
Use Multiplier & Dilution Factor with ISTDs

Signal 1: VWD1 A, Wavelength=250 nm

| Peak # | RetTime [min] | Type | Width [min] | Area [mAU*s] | Height [mAU] | Area %  |
|--------|---------------|------|-------------|--------------|--------------|---------|
| 1      | 23.082        | BV   | 0.4204      | 2.79043e4    | 1022.16467   | 96.2199 |
| 2      | 25.229        | MM   | 0.4293      | 1096.24890   | 42.55674     | 3.7801  |

**(R)-N-(2-Fluoro-2-(quinolin-2-yl)ethyl)-4-(methylthio)aniline 7b**

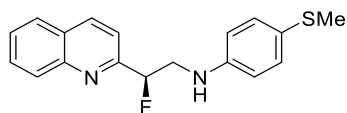

Prepared according to General Procedure B using 2-(1-fluorovinyl)quinoline (17.3 mg, 0.10 mmol, 1.0 equiv), 4-(methylthio)aniline (41.7 mg, 0.30 mmol, 3.0 equiv), (*S*)-TRIP catalyst (15.1 mg, 0.02 mmol, 20 mol%), and CPME (200  $\mu$ L, 0.5 M). The reaction mixture was subjected to the purification outlined in General Procedure B (silica gel, EtOAc:petroleum ether, 5:95 to 10:90) to afford the desired product as a pale brown oil (29.0 mg, 93%).

$\nu_{\max}$  (film): 3318 (br), 2970, 2916, 2839, 1597, 1504, 1319, 1034, 826  $\text{cm}^{-1}$ .

$^1\text{H NMR}$  (500 MHz,  $\text{CDCl}_3$ ):  $\delta$  8.22 (d,  $J = 8.5$  Hz, 1H), 8.10 (d,  $J = 8.5$  Hz, 1H), 7.84 (d,  $J = 8.1$  Hz, 1H), 7.79 – 7.72 (m, 1H), 7.63 (dd,  $J = 8.5, 1.2$  Hz, 1H), 7.57 (t,  $J = 7.5$  Hz, 1H), 7.21 (d,  $J = 8.6$  Hz, 2H), 6.66 (d,  $J = 8.6$  Hz, 2H), 5.89 (ddd,  $^2J_{\text{HF}} = 48.6$  Hz,  $J = 7.3, 3.7$  Hz, 1H), 4.29 (s, 1H), 3.92 (ddd,  $^3J_{\text{HF}} = 26.1$  Hz,  $^2J_{\text{HH}} = 14.1$  Hz,  $J = 3.5$  Hz, 1H), 3.71 (ddd,  $^3J_{\text{HF}} = 21.0$  Hz,  $^2J_{\text{HH}} = 14.1$  Hz,  $J = 7.3$  Hz, 1H), 2.40 (s, 3H).

$^{13}\text{C NMR}$  (126 MHz,  $\text{CDCl}_3$ ):  $\delta$  158.1, 157.9, 146.5, 137.3, 131.4, 130.1, 129.2, 127.9, 127.0, 125.8, 125.2, 117.9 (d,  $^3J = 6.4$  Hz), 114.1, 93.3 (d,  $^1J = 174.9$  Hz), 48.6 (d,  $^2J = 22.4$  Hz), 19.1.

$^{19}\text{F NMR}$  (470 MHz,  $\text{CDCl}_3$ ):  $\delta$  -191.43.

**HRMS (NSI):** exact mass calculated for  $[\text{M}+\text{H}]^+$  ( $\text{C}_{18}\text{H}_{18}\text{N}_2\text{FS}$ ) requires  $m/z$  313.1169, found  $m/z$  313.1165.

The enantiomeric purity of the product was determined by HPLC analysis: 97:3 e.r. (Chiralpak IA, hexane/*i*-PrOH = 90/10, flow rate 0.5 mL/min,  $\lambda = 250$  nm),  $t_r$  (major) = 25.2 min,  $t_r$  (minor) = 27.1 min;

$[\alpha]_{\text{D}}^{20} = +4.4$  ( $c$  1.45,  $\text{CHCl}_3$ ).

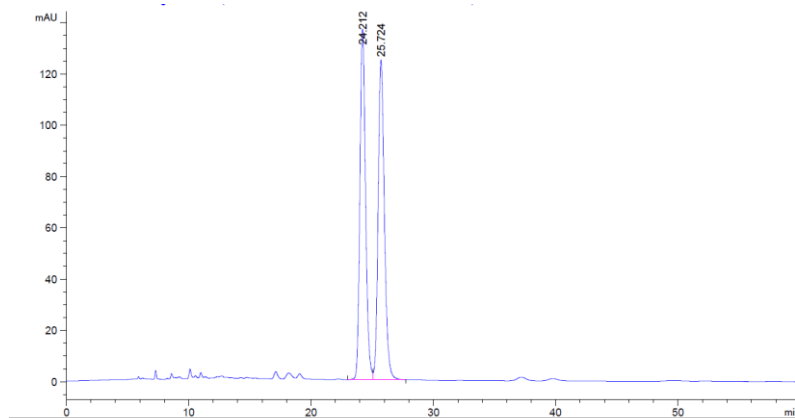

=====  
 Area Percent Report  
 =====

Sorted By : Signal  
 Multiplier : 1.0000  
 Dilution : 1.0000  
 Use Multiplier & Dilution Factor with ISTDs

Signal 1: VWD1 A, Wavelength=250 nm

| Peak # | RetTime [min] | Type | Width [min] | Area [mAU*s] | Height [mAU] | Area %  |
|--------|---------------|------|-------------|--------------|--------------|---------|
| 1      | 24.212        | BV   | 0.4947      | 4403.19873   | 136.88387    | 49.7183 |
| 2      | 25.724        | VB   | 0.5457      | 4453.10205   | 124.86521    | 50.2817 |

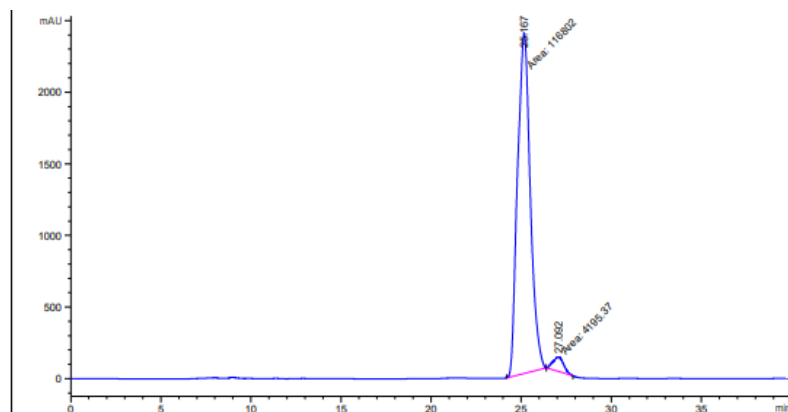

=====  
 Area Percent Report  
 =====

Sorted By : Signal  
 Multiplier : 1.0000  
 Dilution : 1.0000  
 Use Multiplier & Dilution Factor with ISTDs

Signal 1: VWD1 A, Wavelength=250 nm

| Peak # | RetTime [min] | Type | Width [min] | Area [mAU*s] | Height [mAU] | Area %  |
|--------|---------------|------|-------------|--------------|--------------|---------|
| 1      | 25.167        | MM   | 0.8190      | 1.16802e5    | 2376.94727   | 96.5327 |
| 2      | 27.092        | MM   | 0.6820      | 4195.36768   | 102.52654    | 3.4673  |

(*R*)-*N*-(2-Fluoro-2-(quinolin-2-yl)ethyl)-2,3-dihydro-1*H*-inden-5-amine **7c**

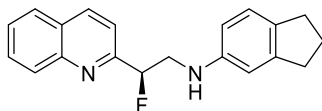

Prepared according to General Procedure B using 2-(1-fluorovinyl)quinoline (17.3 mg, 0.10 mmol, 1.0 equiv), 2,3-dihydro-1*H*-inden-5-amine (39.9 mg, 0.30 mmol, 3.0 equiv), (*S*)-TRIP catalyst (15.1 mg,

0.02 mmol, 20 mol%), and CPME (200  $\mu$ L, 0.5 M). The reaction mixture was subjected to the purification outlined in General Procedure B (silica gel, EtOAc:petroleum ether, 5:95 to 10:90) to afford the desired product as a pale yellow oil (27.2 mg, 89%).

$\nu_{\max}$  (film): 3395 (br), 3041, 3006, 2930, 2839, 1599, 1502, 1058, 833  $\text{cm}^{-1}$ .

$^1\text{H NMR}$  (500 MHz,  $\text{CDCl}_3$ ):  $\delta$  8.22 (d,  $J = 8.5$  Hz, 1H), 8.10 (d,  $J = 8.7$  Hz, 1H), 7.84 (d,  $J = 8.1$  Hz, 1H), 7.75 (ddd,  $J = 8.4, 6.9, 1.5$  Hz, 1H), 7.63 (dd,  $J = 8.5, 1.5$  Hz, 1H), 7.57 (ddd,  $J = 8.1, 6.9, 1.2$  Hz, 1H), 7.04 (d,  $J = 8.0$  Hz, 1H), 6.67 – 6.61 (m, 1H), 6.54 (dd,  $J = 8.0, 2.3$  Hz, 1H), 5.90 (ddd,  $^2J_{\text{HF}} = 48.8$  Hz,  $J = 7.4, 3.7$  Hz, 1H), 4.13 (s, 1H), 3.92 (ddd,  $^3J_{\text{HF}} = 26.4$  Hz,  $^2J_{\text{HH}} = 14.0$  Hz,  $J = 3.7$  Hz, 1H), 3.70 (ddd,  $^3J_{\text{HF}} = 19.6$  Hz,  $^2J_{\text{HH}} = 14.0$  Hz,  $J = 7.4$  Hz, 1H), 2.86 – 2.75 (m, 4H), 2.12 – 1.90 (m, 2H).

$^{13}\text{C NMR}$  (126 MHz,  $\text{CDCl}_3$ ):  $\delta$  158.3 (d,  $^2J = 24.5$  Hz), 147.5, 146.4, 145.6, 137.2, 134.0, 130.0, 129.4, 127.8, 126.9, 124.9, 118.0, 117.9, 112.0, 109.8, 93.4 (d,  $^1J = 174.4$  Hz), 49.2 (d,  $^2J = 22.4$  Hz), 33.2, 32.1, 25.8.

$^{19}\text{F NMR}$  (376 MHz,  $\text{CDCl}_3$ ):  $\delta$  -191.30.

HRMS (NSI): exact mass calculated for  $[\text{M}+\text{H}]^+$  ( $\text{C}_{20}\text{H}_{20}\text{N}_2\text{F}$ ) requires  $m/z$  307.1605, found  $m/z$  307.1607.

The enantiomeric purity of the product was determined by HPLC analysis: 91:9 e.r. (Chiralcel OJ-H, hexane/*i*-PrOH = 50/50, flow rate 1.0 mL/min,  $\lambda = 210$  nm),  $t_r$  (major) = 25.7 min,  $t_r$  (minor) = 38.8 min;

$[\alpha]_{\text{D}}^{20} = +7.0$  ( $c$  1.36,  $\text{CHCl}_3$ ).

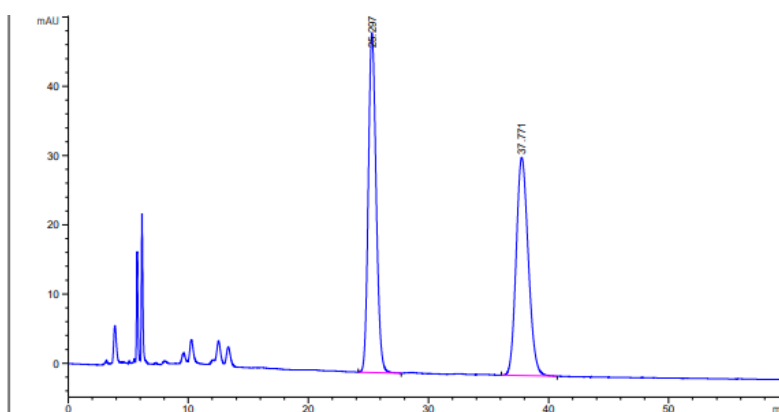

Area Percent Report

Sorted By : Signal  
Multiplier : 1.0000  
Dilution : 1.0000  
Use Multiplier & Dilution Factor with ISTDs

Signal 1: VWD1 A, Wavelength=250 nm

| Peak # | RetTime [min] | Type | Width [min] | Area [mAU*s] | Height [mAU] | Area %  |
|--------|---------------|------|-------------|--------------|--------------|---------|
| 1      | 25.297        | BB   | 0.7026      | 2218.92896   | 49.04015     | 50.0879 |
| 2      | 37.771        | BB   | 1.0750      | 2211.13745   | 31.50676     | 49.9121 |

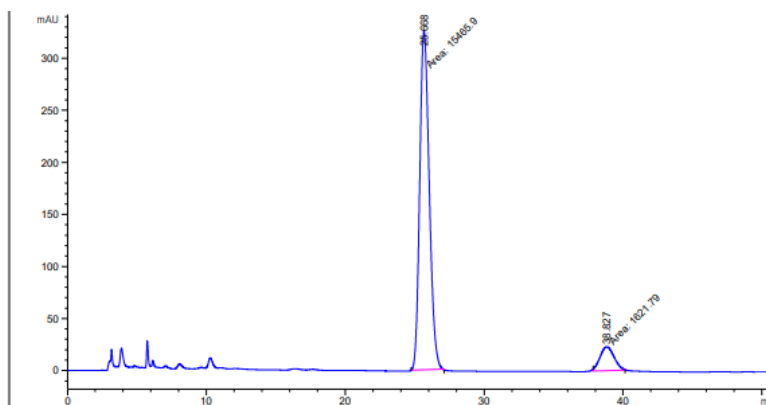

Area Percent Report

Sorted By : Signal  
Multiplier : 1.0000  
Dilution : 1.0000  
Use Multiplier & Dilution Factor with ISTDs

Signal 1: VWD1 A, Wavelength=210 nm

| Peak # | RetTime [min] | Type | Width [min] | Area [mAU*s] | Height [mAU] | Area %  |
|--------|---------------|------|-------------|--------------|--------------|---------|
| 1      | 25.668        | MM   | 0.7928      | 1.54659e4    | 325.14124    | 90.5090 |
| 2      | 38.827        | MM   | 1.1705      | 1621.78674   | 23.09332     | 9.4910  |

(*R*)-3-Bromo-*N*-(2-fluoro-2-(quinolin-2-yl)ethyl)aniline **7d**

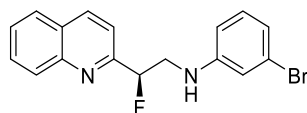

Prepared according to General Procedure B using 2-(1-fluorovinyl)quinoline (17.3 mg, 0.10 mmol, 1.0 equiv), 3-bromoaniline (53.1 mg, 0.30 mmol, 3.0 equiv), (*S*)-TRIP catalyst (15.1 mg, 0.02 mmol, 20 mol%), and CPME (200  $\mu$ L, 0.5 M). The reaction mixture was subjected to the purification outlined in General Procedure B (silica gel, EtOAc:petroleum ether, 5:95 to 10:90) to afford the desired product as a pale yellow oil (30.3 mg, 88%).

$\nu_{\max}$  (film): 3418 (br), 3063, 2924, 2847, 1589, 1504, 1065, 833, 764  $\text{cm}^{-1}$ .

$^1\text{H NMR}$  (400 MHz,  $\text{CDCl}_3$ ):  $\delta$  8.23 (d,  $J = 8.5$  Hz, 1H), 8.11 (d,  $J = 8.5$  Hz, 1H), 7.85 (d,  $J = 8.2$  Hz, 1H), 7.76 (ddd,  $J = 8.4, 6.9, 1.4$  Hz, 1H), 7.63 (dd,  $J = 8.5, 1.3$  Hz, 1H), 7.58 (ddd,  $J = 8.0, 7.0, 1.0$  Hz, 1H), 7.01 (t,  $J = 8.0$  Hz, 1H), 6.87 – 6.79 (m, 2H), 6.65 – 6.57 (m, 1H), 5.89 (ddd,  $^2J_{\text{HF}} = 48.5$  Hz,  $J = 7.0, 3.8$  Hz, 1H), 4.33 (s, 1H), 3.91 (ddd,  $^3J_{\text{HF}} = 25.0$  Hz,  $^2J_{\text{HH}} = 14.1$  Hz,  $J = 3.8$  Hz, 1H), 3.73 (ddd,  $^3J_{\text{HF}} = 20.8$  Hz,  $^2J_{\text{HH}} = 14.1$  Hz,  $J = 7.0$  Hz, 1H).

$^{13}\text{C NMR}$  (126 MHz,  $\text{CDCl}_3$ ):  $\delta$  157.7 (d,  $^2J = 24.6$  Hz), 149.0, 147.4 (d,  $^4J = 2.3$  Hz), 137.4, 130.6, 130.2, 129.2, 127.9, 127.8, 127.0, 123.4, 120.8, 117.8 (d,  $^3J = 6.5$  Hz), 115.9, 112.0, 93.2 (d,  $^1J = 175.2$  Hz), 48.2 (d,  $^2J = 22.4$  Hz).

$^{19}\text{F NMR}$  (377 MHz,  $\text{CDCl}_3$ ):  $\delta$  -191.34.

**HRMS (ESI):** exact mass calculated for  $[M+H]^+$  ( $C_{17}H_{15}N_2BrF$ ) requires  $m/z$  345.0397, found  $m/z$  345.0395.

The enantiomeric purity of the product was determined by HPLC analysis: 94:6 e.r. (Chiralpak IA, hexane/*i*-PrOH = 90/10, flow rate 0.5 mL/min,  $\lambda = 250$  nm),  $t_r$  (major) = 16.7 min,  $t_r$  (minor) = 17.5 min;

$[\alpha]_D^{20} = +31.4$  ( $c$  2.12,  $CHCl_3$ ).

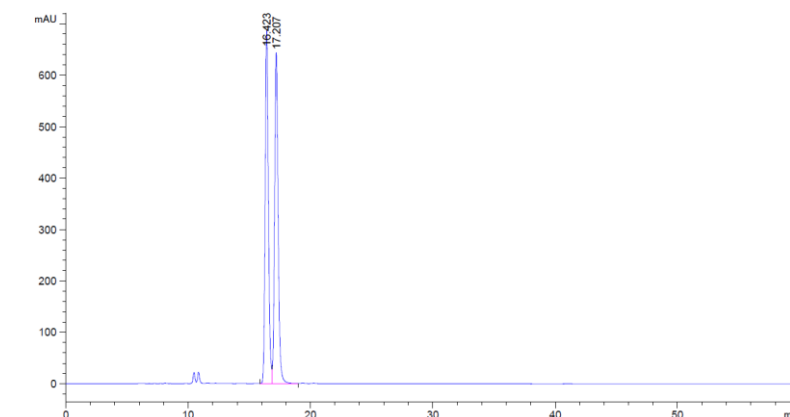

=====  
Area Percent Report  
=====

Sorted By : Signal  
Multiplier : 1.0000  
Dilution : 1.0000  
Use Multiplier & Dilution Factor with ISTDs

Signal 1: VWDL A, Wavelength=250 nm

| Peak # | RetTime [min] | Type | Width [min] | Area [mAU*s] | Height [mAU] | Area %  |
|--------|---------------|------|-------------|--------------|--------------|---------|
| 1      | 16.423        | BV   | 0.2796      | 1.25106e4    | 686.43469    | 49.3029 |
| 2      | 17.207        | VB   | 0.3046      | 1.28644e4    | 643.45532    | 50.6971 |

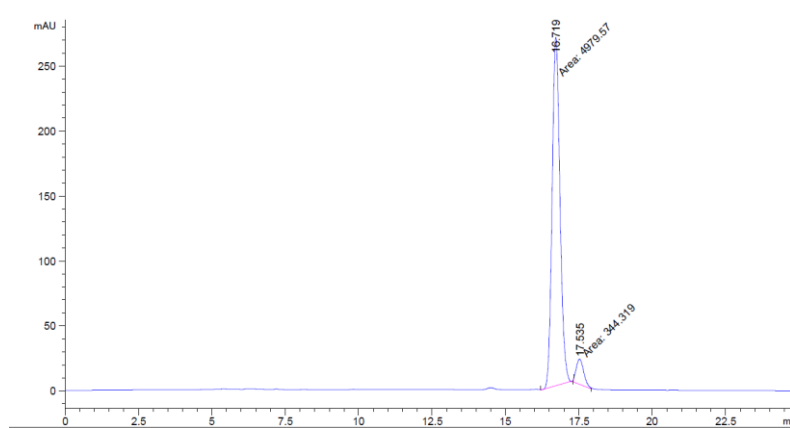

=====  
Area Percent Report  
=====

Sorted By : Signal  
Multiplier : 1.0000  
Dilution : 1.0000  
Use Multiplier & Dilution Factor with ISTDs

Signal 1: VWDL A, Wavelength=250 nm

| Peak # | RetTime [min] | Type | Width [min] | Area [mAU*s] | Height [mAU] | Area %  |
|--------|---------------|------|-------------|--------------|--------------|---------|
| 1      | 16.719        | MM   | 0.3096      | 4979.56592   | 268.05878    | 93.5326 |
| 2      | 17.535        | MM   | 0.2954      | 344.31888    | 19.42668     | 6.4674  |

(*R*)-*N*-(2-Fluoro-2-(quinolin-2-yl)ethyl)-4-(trifluoromethyl)aniline **7e**

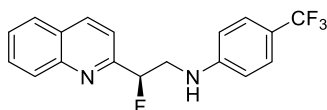

Prepared according to General Procedure B using 2-(1-fluorovinyl)quinoline (17.3 mg, 0.10 mmol, 1.0 equiv), 4-(trifluoromethyl)aniline (48.3 mg, 0.30 mmol, 3.0 equiv), (*S*)-TRIP catalyst (15.1 mg, 0.02 mmol, 20 mol%), and CPME (200  $\mu$ L, 0.5 M). The reaction mixture was subjected to the purification outlined in General Procedure B (silica gel, EtOAc:petroleum ether, 5:95 to 10:90) to afford the desired product as a pale yellow oil (31.2 mg, 93%).

$\nu_{\max}$  (film): 3426 (br), 3055, 2963, 2839, 1612, 1535, 1319, 1103, 1065, 826  $\text{cm}^{-1}$ .

$^1\text{H NMR}$  (500 MHz,  $\text{CDCl}_3$ ):  $\delta$  8.24 (d,  $J = 8.5$  Hz, 1H), 8.11 (d,  $J = 8.5$  Hz, 1H), 7.85 (dd,  $J = 8.1$ , 1.4 Hz, 1H), 7.77 (ddd,  $J = 8.4$ , 6.8, 1.4 Hz, 1H), 7.64 (dd,  $J = 8.5$ , 1.6 Hz, 1H), 7.59 (ddd,  $J = 8.2$ , 6.9, 1.2 Hz, 1H), 7.40 (d,  $J = 8.5$  Hz, 2H), 6.71 (d,  $J = 8.5$  Hz, 2H), 5.90 (ddd,  $^2J_{\text{HF}} = 48.5$  Hz,  $J = 7.0$ , 3.8 Hz, 1H), 4.61 (s, 1H), 3.99 (ddd,  $^3J_{\text{HF}} = 25.1$  Hz,  $^2J_{\text{HH}} = 14.2$  Hz,  $J = 3.8$  Hz, 1H), 3.80 (ddd,  $^3J_{\text{HF}} = 20.9$  Hz,  $^2J_{\text{HH}} = 14.2$  Hz,  $J = 7.0$  Hz, 1H).

$^{13}\text{C NMR}$  (126 MHz,  $\text{CDCl}_3$ ):  $\delta$  157.6 (d,  $^2J = 24.8$  Hz), 150.2, 147.4, 137.5, 130.3, 129.2, 127.9, 127.9, 127.1, 126.8 (q,  $^3J = 3.8$  Hz), 125.0 (q,  $^1J = 270.4$  Hz), 119.6 (q,  $^2J = 32.6$  Hz), 117.8 (d,  $^3J = 6.7$  Hz), 112.5, 93.1 (d,  $^1J = 175.6$  Hz), 47.9 (d,  $^2J = 22.4$  Hz).

$^{19}\text{F NMR}$  (470 MHz,  $\text{CDCl}_3$ ):  $\delta$  -61.07, -191.49.

**HRMS (NSI)**: exact mass calculated for  $[\text{M}+\text{H}]^+$  ( $\text{C}_{18}\text{H}_{15}\text{N}_2\text{F}_4$ ) requires  $m/z$  335.1166, found  $m/z$  336.1158.

The enantiomeric purity of the product was determined by HPLC analysis: 97:3 e.r. (Chiralpak IA, hexane/*i*-PrOH = 90/10, flow rate 0.5 mL/min,  $\lambda = 250$  nm),  $t_r$  (major) = 17.2 min,  $t_r$  (minor) = 18.2 min;

$[\alpha]_{\text{D}}^{20} = +4.7$  ( $c$  1.07,  $\text{CHCl}_3$ ).

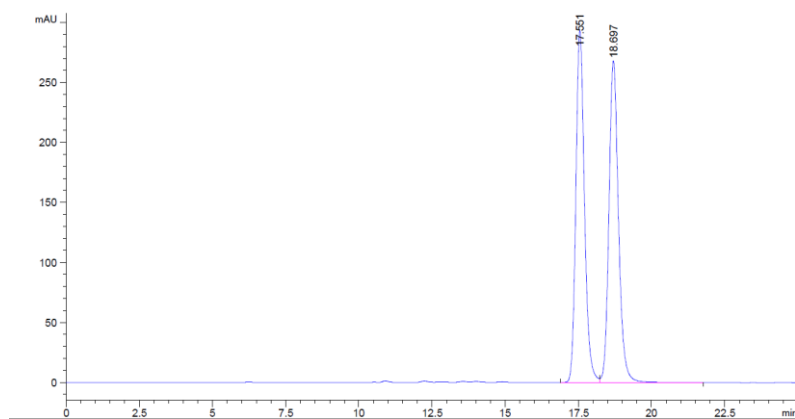

=====  
 Area Percent Report  
 =====

Sorted By : Signal  
 Multiplier : 1.0000  
 Dilution : 1.0000  
 Use Multiplier & Dilution Factor with ISTDs

Signal 1: VWD1 A, Wavelength=250 nm

| Peak # | RetTime [min] | Type | Width [min] | Area [mAU*s] | Height [mAU] | Area %  |
|--------|---------------|------|-------------|--------------|--------------|---------|
| 1      | 17.551        | BV   | 0.3124      | 5980.82959   | 292.94598    | 49.6500 |
| 2      | 18.697        | VB   | 0.3454      | 6065.15576   | 268.12650    | 50.3500 |

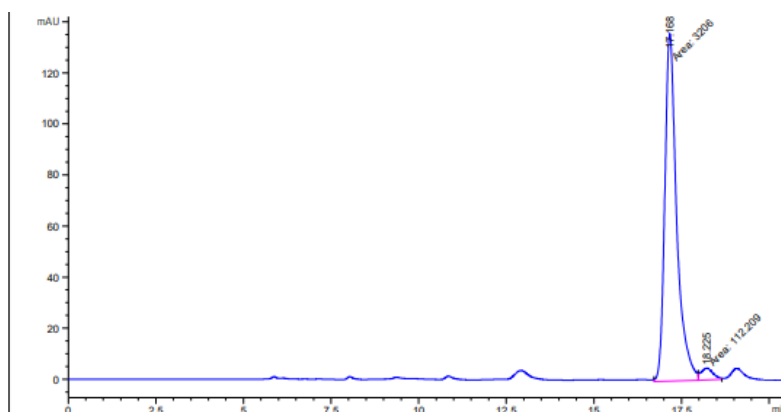

=====  
 Area Percent Report  
 =====

Sorted By : Signal  
 Multiplier : 1.0000  
 Dilution : 1.0000  
 Use Multiplier & Dilution Factor with ISTDs

Signal 1: VWD1 A, Wavelength=250 nm

| Peak # | RetTime [min] | Type | Width [min] | Area [mAU*s] | Height [mAU] | Area %  |
|--------|---------------|------|-------------|--------------|--------------|---------|
| 1      | 17.168        | MF   | 0.3925      | 3205.99536   | 136.12822    | 96.6184 |
| 2      | 18.225        | FM   | 0.4026      | 112.20947    | 4.64504      | 3.3816  |

*(R)*-*N*-(2-Fluoro-2-(quinolin-2-yl)ethyl)-4-(4,4,5,5-tetramethyl-1,3,2-dioxaborolan-2-yl)aniline **7f**

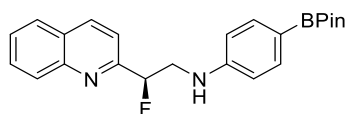



Prepared according to General Procedure A using 2-(1-fluorovinyl)quinoline (17.3 mg, 0.10 mmol, 1.0 equiv), 4-(4,4,5,5-tetramethyl-1,3,2-dioxaborolan-2-yl)aniline (65.7 mg, 0.30 mmol, 3.0 equiv), (*S*)-TRIP catalyst (15.1 mg, 0.02 mmol, 20 mol%), and THF (200  $\mu$ L, 0.5 M) at  $-20$   $^{\circ}$ C for 5 d. The reaction mixture was subjected to the purification outlined in General Procedure A (silica gel, EtOAc:petroleum ether, 5:95 to 10:90) to afford the desired product as a pale yellow solid (31.0 mg, 79%).

$\nu_{\max}$  (film): 3401 (br), 3041, 2973, 2928, 1606, 1359, 1145  $\text{cm}^{-1}$ .

$^1\text{H}$  NMR (400 MHz,  $\text{CD}_2\text{Cl}_2$ ):  $\delta$  8.27 (d,  $J = 8.5$  Hz, 1H), 8.09 (d,  $J = 8.5$  Hz, 1H), 7.88 (d,  $J = 8.2$  Hz, 1H), 7.76 (ddd,  $J = 8.4, 6.9, 1.4$  Hz, 1H), 7.63 (dd,  $J = 8.5, 1.4$  Hz, 1H), 7.61 – 7.50 (m, 3H), 6.75 – 6.63 (m, 2H), 5.87 (ddd,  $^2J_{\text{HF}} = 48.6$  Hz,  $J = 7.1, 3.8$  Hz, 1H), 4.52 (s, 1H), 3.97 (m, 1H), 3.79 (ddd,  $^3J_{\text{HF}} = 20.1$  Hz,  $^2J_{\text{HH}} = 13.4$  Hz,  $J = 6.3$  Hz, 1H), 1.30 (s, 12H).

$^{13}\text{C}$  NMR (101 MHz,  $\text{CD}_2\text{Cl}_2$ ):  $\delta$  158.2 (d,  $^2J = 24.4$  Hz), 150.6, 137.5, 136.6, 136.6, 130.3, 129.5, 128.2, 128.1, 128.1, 127.2, 118.2 (d,  $^3J = 6.1$  Hz), 112.5, 93.7 (d,  $^1J = 174.8$  Hz), 83.6, 48.0 (d,  $^2J = 22.4$  Hz), 25.1.

$^{19}\text{F}$  NMR (376 MHz,  $\text{CD}_2\text{Cl}_2$ ):  $\delta$   $-190.85$ .

$^{11}\text{B}$  NMR (128 MHz,  $\text{CD}_2\text{Cl}_2$ ):  $\delta$  30.69.

HRMS (NSI): exact mass calculated for  $[\text{M}+\text{H}]^+$  ( $\text{C}_{23}\text{H}_{27}\text{N}_2\text{O}_2\text{FB}$ ) requires  $m/z$  392.2154, found  $m/z$  393.2202.

The enantiomeric purity of the product was determined by HPLC analysis: 93:7 e.r. (Chiralpak IA, hexane/*i*-PrOH = 90/10, flow rate 0.5 mL/min,  $\lambda = 250$  nm),  $t_r$  (major) = 17.5 min,  $t_r$  (minor) = 18.9 min;

$[\alpha]_D^{20} = +43.4$  ( $c$  0.15,  $\text{CHCl}_3$ ).

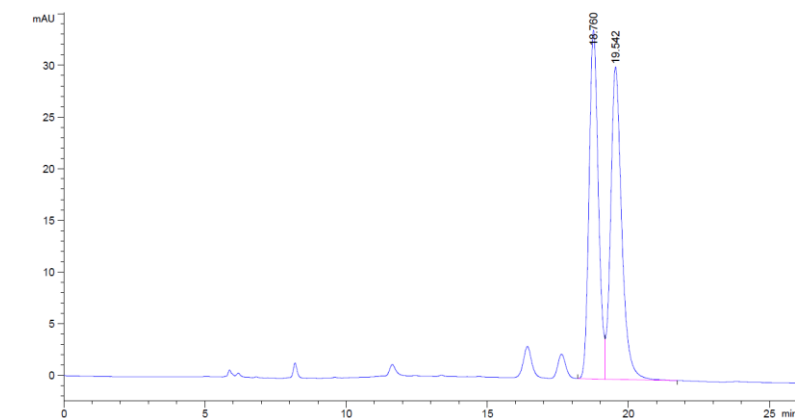

```

=====
                          Area Percent Report
=====
Sorted By      :      Signal
Multiplier     :      1.0000
Dilution       :      1.0000
Use Multiplier & Dilution Factor with ISTDs

Signal 1: VWd1 A, Wavelength=250 nm

Peak RetTime Type Width Area Height Area
# [min] [min] [min] [mAU*s] [mAU] %
-----|-----|-----|-----|-----|-----
1 18.760 BV 0.3529 772.33557 33.74578 48.4127
2 19.542 VB 0.4107 822.97955 30.23723 51.5873

```

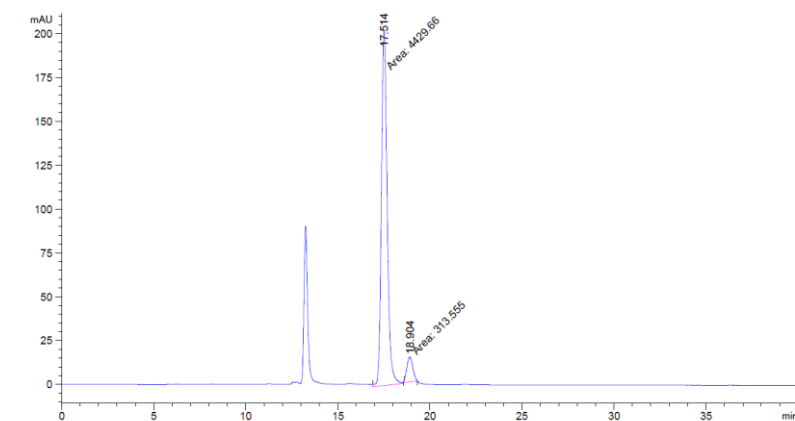

=====  
 Area Percent Report  
 =====

Sorted By : Signal  
 Multiplier : 1.0000  
 Dilution : 1.0000  
 Use Multiplier & Dilution Factor with ISTDs

Signal 1: VWD1 A, Wavelength=250 nm

| Peak # | RetTime [min] | Type | Width [min] | Area [mAU*s] | Height [mAU] | Area %  |
|--------|---------------|------|-------------|--------------|--------------|---------|
| 1      | 17.514        | MM   | 0.3651      | 4429.66260   | 202.23083    | 93.3894 |
| 2      | 18.904        | MM   | 0.3693      | 313.55548    | 14.15067     | 6.6106  |

**(R)-4-Bromo-N-(2-fluoro-2-(quinolin-2-yl)ethyl)aniline 7g**

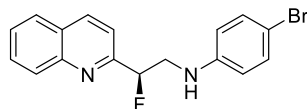

Prepared according to General Procedure A using 2-(1-fluorovinyl)quinoline (17.3 mg, 0.10 mmol, 1.0 equiv), 4-bromoaniline (51.6 mg, 0.30 mmol, 3.0 equiv), (*S*)-TRIP catalyst (15.1 mg, 0.02 mmol, 20 mol%), and THF (200  $\mu$ L, 0.5 M) at  $-20$   $^{\circ}$ C for 5 d. The reaction mixture was subjected to the purification outlined in General Procedure A (silica gel, EtOAc:petroleum ether, 5:95 to 10:90) to afford the desired product as a pale yellow oil (24.4 mg, 71%).

$\nu_{\text{max}}$  (film): 3403 (br), 3026, 2928, 2851, 1599, 813  $\text{cm}^{-1}$ .

$^1\text{H}$  NMR (400 MHz,  $\text{CDCl}_3$ ):  $\delta$  8.23 (d,  $J = 8.5$  Hz, 1H), 8.09 (d,  $J = 8.4$  Hz, 1H), 7.85 (d,  $J = 8.1$  Hz, 1H), 7.76 (ddd,  $J = 8.4, 6.9, 1.4$  Hz, 1H), 7.63 (dd,  $J = 8.5, 1.5$  Hz, 1H), 7.58 (ddd,  $J = 8.1, 6.9, 1.1$  Hz, 1H), 7.26 – 7.22 (m, 1H), 6.62 – 6.56 (m, 2H), 5.87 (ddd,  $^2J_{\text{HF}} = 48.7$  Hz,  $J = 7.1, 3.8$  Hz, 2H), 4.28 (t,  $J = 5.8$  Hz, 1H), 3.91 (dddd,  $^3J_{\text{HF}} = 25.4$  Hz,  $^2J_{\text{HH}} = 14.0$  Hz,  $J = 7.3, 3.8$  Hz, 1H), 3.78 – 3.65 (m, 1H).

$^{13}\text{C}$  NMR (101 MHz,  $\text{CDCl}_3$ ):  $\delta$  157.9 (d,  $^2J = 24.5$  Hz), 146.7, 137.3, 132.2, 132.1, 130.2, 129.4, 127.9, 127.0, 117.9 (d,  $^3J = 6.9$  Hz), 115.0, 109.8, 94.1, 93.3 (d,  $^1J = 175.0$  Hz), 48.5 (d,  $^2J = 22.4$  Hz).

$^{19}\text{F}$  NMR (376 MHz,  $\text{CDCl}_3$ ):  $\delta$   $-191.44$ .

HRMS (NSI): exact mass calculated for  $[\text{M}+\text{H}]^+$  ( $\text{C}_{17}\text{H}_{15}\text{N}_2\text{FBr}$ ) requires  $m/z$  345.0403, found  $m/z$  345.0400.

The enantiomeric purity of the product was determined by HPLC analysis: 90:10 e.r. (Chiralpak IA, hexane/*i*-PrOH = 50/50, flow rate 0.3 mL/min,  $\lambda = 250$  nm),  $t_r$  (major) = 14.1 min,  $t_r$  (minor) = 15.0 min;

$[\alpha]_D^{20} = +58.6$  ( $c$  1.22,  $\text{CHCl}_3$ ).

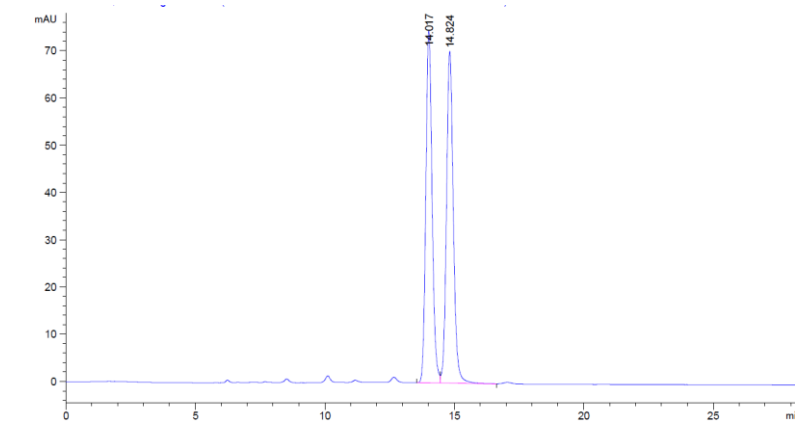

```

=====
                          Area Percent Report
=====
Sorted By      :      Signal
Multiplier    :      1.0000
Dilution      :      1.0000
Use Multiplier & Dilution Factor with ISTDs
  
```

```

Signal 1: VWd1 A, Wavelength=250 nm
  
```

| Peak # | RetTime [min] | Type | Width [min] | Area [mAU*s] | Height [mAU] | Area %  |
|--------|---------------|------|-------------|--------------|--------------|---------|
| 1      | 14.017        | VB   | 0.2586      | 1251.85400   | 74.50861     | 49.3576 |
| 2      | 14.824        | VB   | 0.2801      | 1284.44275   | 70.30343     | 50.6424 |

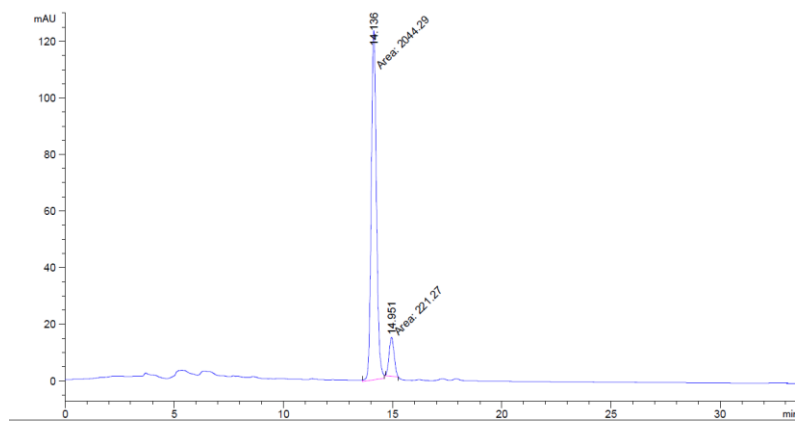

```

=====
                          Area Percent Report
=====
Sorted By      :      Signal
Multiplier    :      1.0000
Dilution      :      1.0000
Use Multiplier & Dilution Factor with ISTDs
  
```

```

Signal 1: VWd1 A, Wavelength=250 nm
  
```

| Peak # | RetTime [min] | Type | Width [min] | Area [mAU*s] | Height [mAU] | Area %  |
|--------|---------------|------|-------------|--------------|--------------|---------|
| 1      | 14.136        | MM   | 0.2758      | 2044.29187   | 123.52139    | 90.2333 |
| 2      | 14.951        | MM   | 0.2681      | 221.27008    | 13.75688     | 9.7667  |

(*R*)-2-Fluoro-*N*-(2-fluoro-2-(quinolin-2-yl)ethyl)aniline **7h**

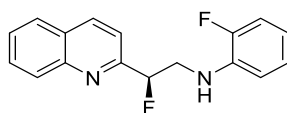

Prepared according to General Procedure B using 2-(1-fluorovinyl)quinoline (17.3 mg, 0.10 mmol, 1.0 equiv), 2-fluoroaniline (33.3 mg, 0.30 mmol, 3.0 equiv), (*S*)-TRIP catalyst (15.1 mg, 0.02 mmol, 20 mol%), and CPME (200  $\mu$ L, 0.5 M). The reaction mixture was subjected to the purification outlined in General Procedure B (silica gel, EtOAc:petroleum ether, 5:95 to 10:90) to afford the desired product as a pale yellow oil (13.1 mg, 46%).

$\nu_{\text{max}}$  (film): 3422 (br), 3065, 2928, 2857, 1620, 1516, 1506, 1190, 829, 743  $\text{cm}^{-1}$ .

$^1\text{H NMR}$  (400 MHz,  $\text{CDCl}_3$ ):  $\delta$  8.24 (d,  $J = 8.5$  Hz, 1H), 8.10 (d,  $J = 8.8$  Hz, 1H), 7.85 (d,  $J = 7.2$  Hz, 1H), 7.76 (ddd,  $J = 8.4, 6.9, 1.4$  Hz, 1H), 7.65 (dd,  $J = 8.5, 1.6$  Hz, 1H), 7.57 (ddd,  $J = 8.1, 6.9, 1.1$  Hz, 1H), 7.04 – 6.91 (m, 2H), 6.84 (td,  $J = 8.5, 1.4$  Hz, 1H), 6.69 – 6.55 (m, 1H), 5.91 (ddd,  $^2J_{\text{HF}} = 48.6$  Hz,  $J = 7.1, 3.8$  Hz, 1H), 4.56 (s, 1H), 3.97 (dddd,  $^3J_{\text{HF}} = 25.3$  Hz,  $^2J_{\text{HH}} = 14.1$  Hz,  $J = 7.1, 3.7$  Hz, 1H), 3.84 – 3.71 (m, 1H).

$^{13}\text{C NMR}$  (101 MHz,  $\text{CDCl}_3$ ):  $\delta$  158.0 (d,  $^2J = 24.6$  Hz), 151.9 (d,  $^1J = 238.8$  Hz), 147.6 (d,  $^4J = 1.8$  Hz), 137.3, 136.2 (d,  $^3J = 11.0$  Hz), 130.1, 129.4, 127.9, 127.0, 124.7, 124.7, 117.9 (d,  $^3J = 6.9$  Hz), 117.4 (d,  $^3J = 7.1$  Hz), 114.7 (d,  $^2J = 18.7$  Hz), 112.7 (d,  $^4J = 2.7$  Hz), 93.3 (d,  $^1J = 175.4$  Hz), 48.2 (d,  $^2J = 22.4$  Hz).

$^{19}\text{F NMR}$  (376 MHz,  $\text{CDCl}_3$ ):  $\delta$  -136.12, -191.53.

**HRMS (NSI)**: exact mass calculated for  $[\text{M}+\text{H}]^+$  ( $\text{C}_{17}\text{H}_{15}\text{N}_2\text{F}_2$ ) requires  $m/z$  285.1203, found  $m/z$  285.1202.

The enantiomeric purity of the product was determined by HPLC analysis: 89:11 e.r. (Chiralcel OJ-H, hexane/*i*-PrOH = 50/50, flow rate 0.5 mL/min,  $\lambda = 250$  nm),  $t_r$  (major) = 19.7 min,  $t_r$  (minor) = 22.0 min;

$[\alpha]_{\text{D}}^{20} = +3.4$  ( $c$  0.65,  $\text{CHCl}_3$ ).

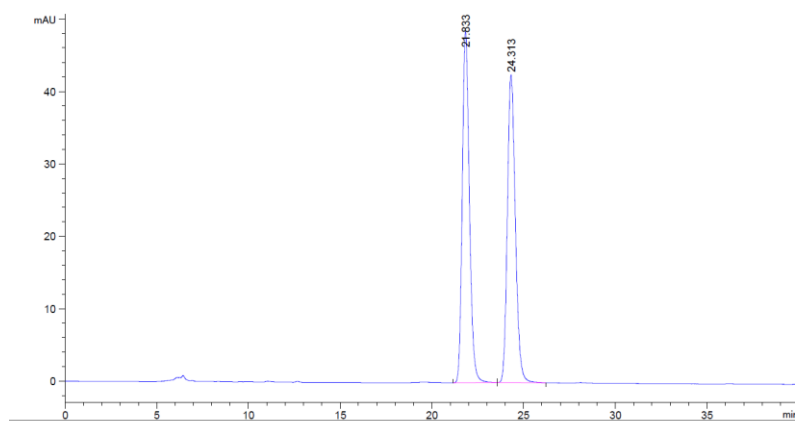

=====  
 Area Percent Report  
 =====

Sorted By : Signal  
 Multiplier : 1.0000  
 Dilution : 1.0000  
 Use Multiplier & Dilution Factor with ISTDs

Signal 1: VWD1 A, Wavelength=250 nm

| Peak # | RetTime [min] | Type | Width [min] | Area [mAU*s] | Height [mAU] | Area %  |
|--------|---------------|------|-------------|--------------|--------------|---------|
| 1      | 21.833        | BB   | 0.4178      | 1311.95435   | 48.45583     | 50.5078 |
| 2      | 24.313        | BB   | 0.4666      | 1285.57263   | 42.48009     | 49.4922 |

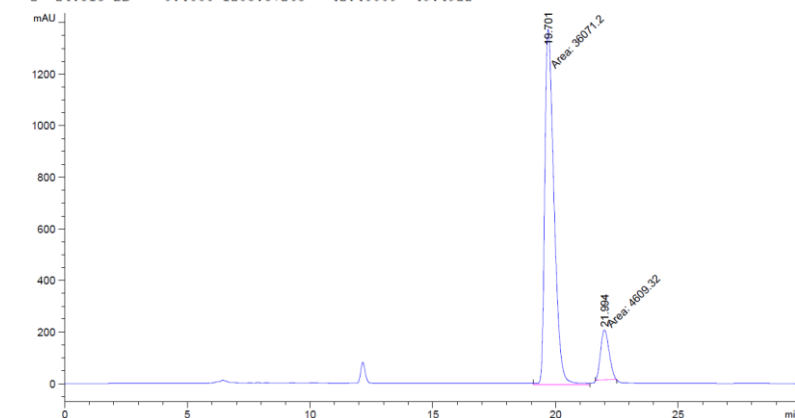

=====  
 Area Percent Report  
 =====

Sorted By : Signal  
 Multiplier : 1.0000  
 Dilution : 1.0000  
 Use Multiplier & Dilution Factor with ISTDs

Signal 1: VWD1 A, Wavelength=250 nm

| Peak # | RetTime [min] | Type | Width [min] | Area [mAU*s] | Height [mAU] | Area %  |
|--------|---------------|------|-------------|--------------|--------------|---------|
| 1      | 19.701        | MM   | 0.4365      | 3.60712e4    | 1377.26685   | 88.6695 |
| 2      | 21.994        | MM   | 0.3972      | 4609.32080   | 193.43065    | 11.3305 |

**(R)-3-Fluoro-N-(2-fluoro-2-(quinolin-2-yl)ethyl)-4-methylaniline 7i**

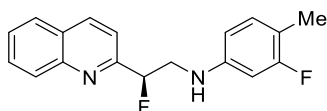

Prepared according to General Procedure B using 2-(1-fluorovinyl)quinoline (17.3 mg, 0.10 mmol, 1.0 equiv), 3-fluoro-4-methylaniline (37.5 mg, 0.30 mmol, 3.0 equiv), (*S*)-TRIP catalyst (15.1 mg, 0.02

mmol, 20 mol%), and CPME (200  $\mu$ L, 0.5 M). The reaction mixture was subjected to the purification outlined in General Procedure B (silica gel, EtOAc:petroleum ether, 5:95 to 10:90) to afford the desired product as a pale yellow oil (29.2 mg, 98%).

$\nu_{\text{max}}$  (film): 3433 (br), 3048, 2924, 2862, 1636, 1597, 1520, 833  $\text{cm}^{-1}$ .

$^1\text{H NMR}$  (500 MHz,  $\text{CDCl}_3$ ):  $\delta$  8.23 (d,  $J = 8.5$  Hz, 1H), 8.09 (d,  $J = 8.5$  Hz, 1H), 7.84 (d,  $J = 8.1$  Hz, 1H), 7.78 – 7.71 (m, 1H), 7.66 – 7.60 (m, 1H), 7.57 (t,  $J = 7.4$  Hz, 1H), 6.82 (t,  $J = 9.1$  Hz, 1H), 6.52 (dd,  $J = 13.3, 2.7$  Hz, 1H), 6.41 (dd,  $J = 8.7, 1.2$  Hz, 1H), 5.87 (ddd,  $^2J_{\text{HF}} = 48.7$  Hz,  $J = 7.2, 3.7$  Hz, 1H), 4.12 (s, 1H), 3.94 – 3.82 (m, 1H), 3.74 – 3.62 (m, 1H), 2.15 (s, 3H).

$^{13}\text{C NMR}$  (126 MHz,  $\text{CDCl}_3$ ):  $\delta$  162.2 (d,  $^1J = 242.4$  Hz), 157.9 (d,  $^2J = 24.6$  Hz), 147.4, 147.3 (d,  $^3J = 10.6$  Hz), 137.3, 131.8 (d,  $^3J = 7.1$  Hz), 130.1, 129.3, 127.9, 127.8, 127.0, 117.8 (d,  $^3J = 6.5$  Hz), 113.6 (d,  $^2J = 17.7$  Hz), 109.15 (d,  $^4J = 2.4$  Hz), 100.4 (d,  $^2J = 26.1$  Hz), 93.2 (d,  $^1J = 174.8$  Hz), 48.7 (d,  $^2J = 22.4$  Hz), 13.7 (d,  $^4J = 3.3$  Hz).

$^{19}\text{F NMR}$  (470 MHz,  $\text{CDCl}_3$ ):  $\delta$  -116.69, -191.35.

**HRMS (ESI):** exact mass calculated for  $[\text{M}+\text{H}]^+$  ( $\text{C}_{18}\text{H}_{17}\text{ON}_2\text{F}_2$ ) requires  $m/z$  299.1354, found  $m/z$  299.1351.

The enantiomeric purity of the product was determined by HPLC analysis: 98:2 e.r. (Chiralpak IA, hexane/*i*-PrOH = 90/10, flow rate 0.3 mL/min,  $\lambda = 250$  nm),  $t_r$  (major) = 16.3 min,  $t_r$  (minor) = 17.1 min;

$[\alpha]_{\text{D}}^{20} = +14.6$  ( $c$  1.6,  $\text{CHCl}_3$ ).

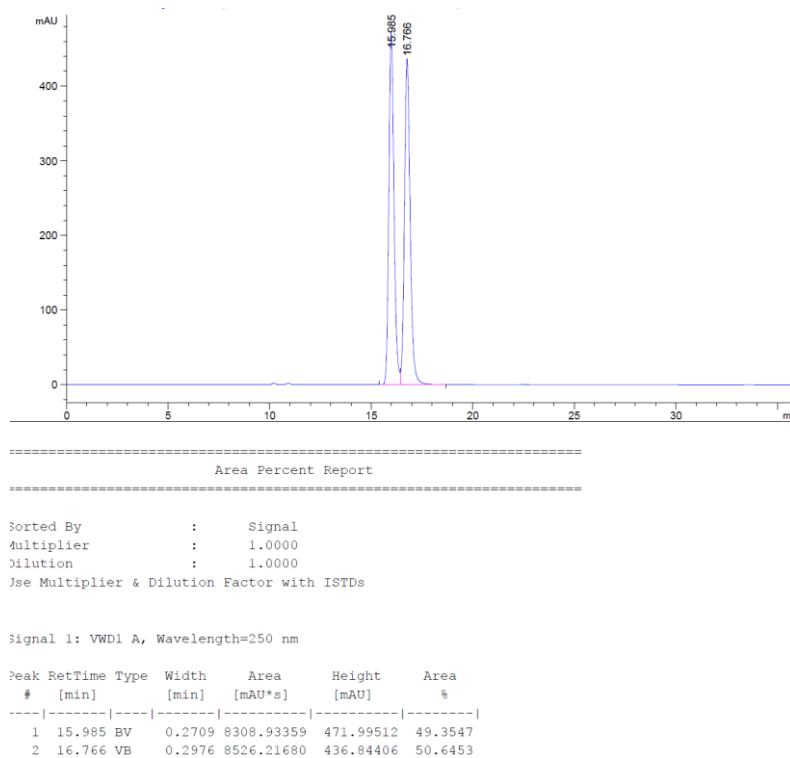

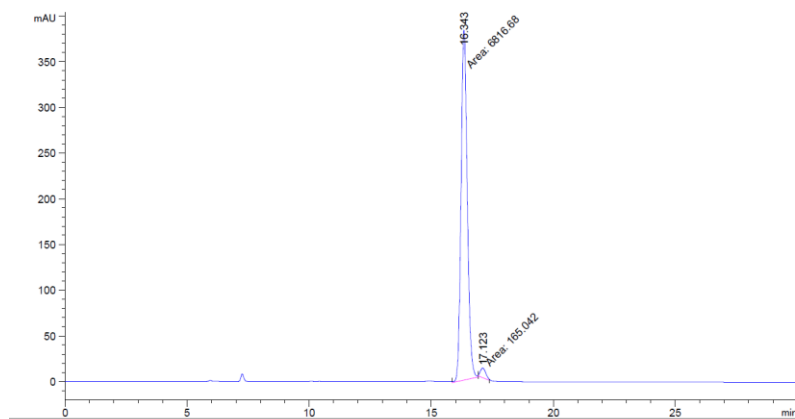

=====  
Area Percent Report  
=====

Sorted By : Signal  
Multiplier : 1.0000  
Dilution : 1.0000  
Use Multiplier & Dilution Factor with ISTDs

Signal 1: VWD1 A, Wavelength=250 nm

| Peak # | RetTime [min] | Type | Width [min] | Area [mAU*s] | Height [mAU] | Area %  |
|--------|---------------|------|-------------|--------------|--------------|---------|
| 1      | 16.343        | MM   | 0.2963      | 6816.67725   | 383.37057    | 97.6361 |
| 2      | 17.123        | MM   | 0.2606      | 165.04242    | 10.55658     | 2.3639  |

**(R)-3-Fluoro-N-(2-fluoro-2-(quinolin-2-yl)ethyl)-4-methoxyaniline 7j**

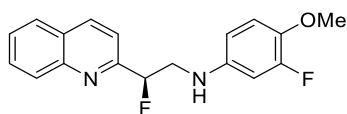

Prepared according to General Procedure A using 2-(1-fluorovinyl)quinoline (17.3 mg, 0.10 mmol, 1.0 equiv), 3-fluoro-4-methoxyaniline (42.3 mg, 0.30 mmol, 3.0 equiv), (*S*)-TRIP catalyst (15.1 mg, 0.02 mmol, 20 mol%), and THF (200  $\mu$ L, 0.5 M). The reaction mixture was subjected to the purification outlined in General Procedure A (silica gel, EtOAc:petroleum ether, 5:95 to 10:90) to afford the desired product as a pale yellow oil (24.6 mg, 72%).

$\nu_{\text{max}}$  (film): 3398 (br), 3056, 2948, 2932, 2833, 1519, 1227  $\text{cm}^{-1}$ .

$^1\text{H NMR}$  (500 MHz,  $\text{CDCl}_3$ ):  $\delta$  8.23 (d,  $J = 8.5$  Hz, 1H), 8.09 (d,  $J = 8.5$  Hz, 1H), 7.84 (d,  $J = 8.1$  Hz, 1H), 7.78 – 7.71 (m, 1H), 7.66 – 7.60 (m, 1H), 7.57 (t,  $J = 7.4$  Hz, 1H), 6.82 (t,  $J = 9.1$  Hz, 1H), 6.52 (dd,  $J = 13.3, 2.7$  Hz, 1H), 6.41 (dd,  $J = 8.7, 1.2$  Hz, 1H), 5.87 (ddd,  $^2J_{\text{HF}} = 48.7$  Hz,  $J = 7.2, 3.7$  Hz, 1H), 4.12 (s, 1H), 3.94 – 3.82 (m, 1H), 3.80 (s, 3H), 3.74 – 3.62 (m, 1H).

$^{13}\text{C NMR}$  (126 MHz,  $\text{CDCl}_3$ ):  $\delta$  158.0 (d,  $^2J = 24.6$  Hz), 153.7 (d,  $^1J = 244.2$  Hz), 147.5, 142.8 (d,  $^3J = 9.1$  Hz), 140.0 (d,  $^3J = 11.3$  Hz), 137.3, 130.1, 129.4, 127.9, 127.9, 127.0, 117.8 (d,  $^3J = 6.5$  Hz), 116.1 (d,  $^4J = 3.1$  Hz), 108.7 (d,  $^4J = 3.2$  Hz), 102.7 (d,  $^2J = 22.0$  Hz), 93.3 (d,  $^1J = 174.7$  Hz), 57.7, 49.3 (d,  $^2J = 22.5$  Hz).

$^{19}\text{F NMR}$  (376 MHz,  $\text{CDCl}_3$ ):  $\delta$  -133.38, -191.48.

HRMS (NSI): exact mass calculated for  $[\text{M}+\text{H}]^+$  ( $\text{C}_{18}\text{H}_{17}\text{ON}_2\text{F}_2$ ) requires  $m/z$  315.1303, found  $m/z$  315.1306.

The enantiomeric purity of the product was determined by HPLC analysis: 93:7 e.r. (Chiralcel OJ-H, hexane/*i*-PrOH = 70/30, flow rate 0.5 mL/min,  $\lambda = 250$  nm),  $t_r$  (major) = 92.3 min,  $t_r$  (minor) = 97.7 min;

$[\alpha]_D^{20} = +7.9$  ( $c$  1.2,  $\text{CHCl}_3$ ).

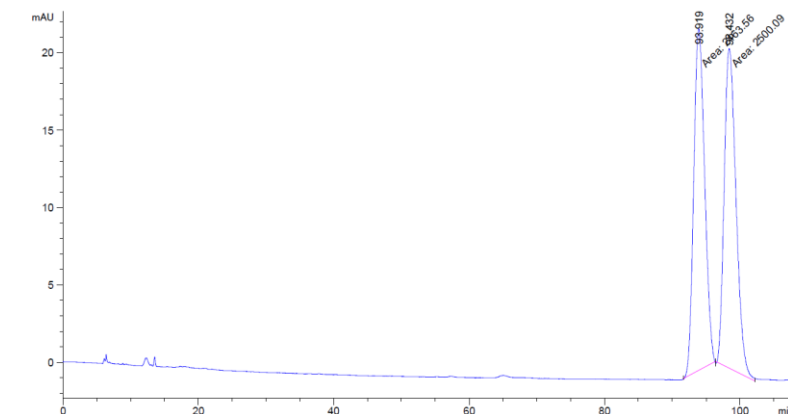

```

=====
                        Area Percent Report
=====
Sorted By      :      Signal
Multiplier     :      1.0000
Dilution      :      1.0000
Use Multiplier & Dilution Factor with ISTDs

```

```

Signal 1: VWD1 A, Wavelength=250 nm

Peak RetTime Type Width Area Height Area
# [min] [min] [min] [mAU*s] [mAU] [%]
-----|-----|-----|-----|-----|-----|
1 93.919 MM 1.8602 2463.55908 22.07241 49.6320
2 98.432 MM 2.0162 2500.09351 20.66677 50.3680

```

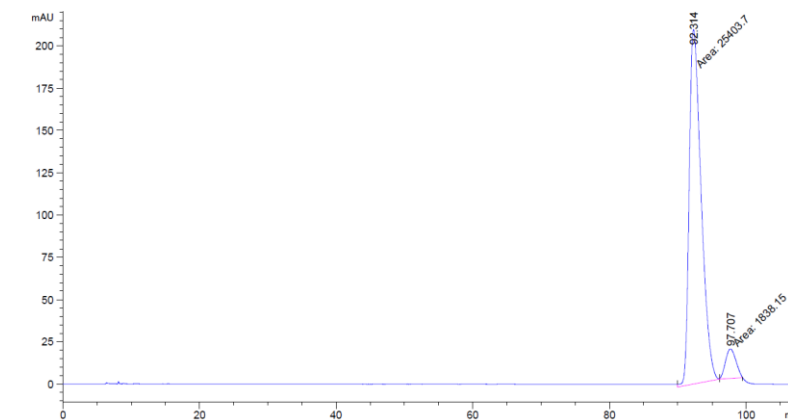

```

=====
                        Area Percent Report
=====
Sorted By      :      Signal
Multiplier     :      1.0000
Dilution      :      1.0000
Use Multiplier & Dilution Factor with ISTDs

```

```

Signal 1: VWD1 A, Wavelength=250 nm

Peak RetTime Type Width Area Height Area
# [min] [min] [min] [mAU*s] [mAU] [%]
-----|-----|-----|-----|-----|-----|
1 92.314 MM 2.0188 2.54037e4 209.72574 93.2525
2 97.707 MM 1.7613 1838.15466 17.39389 6.7475

```



(*R*)-*N*-(2-Fluoro-2-(quinolin-2-yl)ethyl)benzo[*b*]thiophen-5-amine **7k**

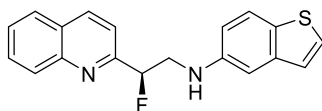

Prepared according to General Procedure A using 2-(1-fluorovinyl)quinoline (17.3 mg, 0.10 mmol, 1.0 equiv), benzo[*b*]thiophen-5-amine (44.7 mg, 0.30 mmol, 3.0 equiv), (*S*)-TRIP catalyst (15.1 mg, 0.02 mmol, 20 mol%), and THF (200  $\mu$ L, 0.5 M) at  $-20$   $^{\circ}$ C for 5 d. The reaction mixture was subjected to the purification outlined in General Procedure A (silica gel, EtOAc:petroleum ether, 5:95 to 10:90) to afford the desired product as a pale yellow solid (18.7 mg, 58%).

$\nu_{\text{max}}$  (film): 3389 (br), 3058, 3021, 2924, 2848, 1599, 1504, 1437, 1065, 831, 749, 691  $\text{cm}^{-1}$ .

$^1\text{H NMR}$  (500 MHz, MeOD):  $\delta$  8.30 (d,  $J = 8.5$  Hz, 1H), 8.07 (d,  $J = 8.5$  Hz, 1H), 7.88 (d,  $J = 8.1$  Hz, 1H), 7.82 – 7.73 (m, 1H), 7.65 (d,  $J = 8.4$  Hz, 1H), 7.57 (t,  $J = 7.2$  Hz, 1H), 7.54 (d,  $J = 8.7$  Hz, 1H), 7.36 (d,  $J = 5.4$  Hz, 1H), 7.08 (d,  $J = 5.7$  Hz, 2H), 6.81 (dd,  $J = 8.7, 2.2$  Hz, 1H), 5.86 (ddd,  $^2J_{\text{HF}} = 48.7$  Hz,  $J = 7.5, 3.4$  Hz, 1H), 3.86 (ddd,  $^3J_{\text{HF}} = 27.5$  Hz,  $^2J_{\text{HH}} = 14.6$  Hz,  $J = 3.4$  Hz, 1H), 3.71 (ddd,  $^3J_{\text{HF}} = 20.2$  Hz,  $^2J_{\text{HH}} = 14.6$  Hz,  $J = 7.5$  Hz, 1H). (N-H proton not observed)

$^{13}\text{C NMR}$  (126 MHz, MeOD):  $\delta$  159.7 (d,  $^2J = 23.9$  Hz), 148.4, 146.9, 142.4, 138.9, 131.3, 130.7, 129.3, 129.3, 129.1, 128.1, 127.5, 124.4, 123.5, 119.3 (d,  $^3J = 6.0$  Hz), 115.3, 106.2, 94.4 (d,  $^1J = 174.9$  Hz), 50.1 (d,  $^2J = 23.2$  Hz).

$^{19}\text{F NMR}$  (376 MHz, MeOD):  $\delta$   $-190.65$ .

**HRMS (NSI)**: exact mass calculated for  $[\text{M}+\text{H}]^+$  ( $\text{C}_{19}\text{H}_{16}\text{N}_2\text{FS}$ ) requires  $m/z$  323.1013, found  $m/z$  323.1016.

The enantiomeric purity of the product was determined by HPLC analysis: 94:6 e.r. (Chiralpak IA, hexane/*i*-PrOH = 50/50, flow rate 0.5 mL/min,  $\lambda = 250$  nm),  $t_r$  (major) = 14.9 min,  $t_r$  (minor) = 15.8 min;

$[\alpha]_{\text{D}}^{20} = +9.0$  ( $c$  0.94,  $\text{CHCl}_3$ ).

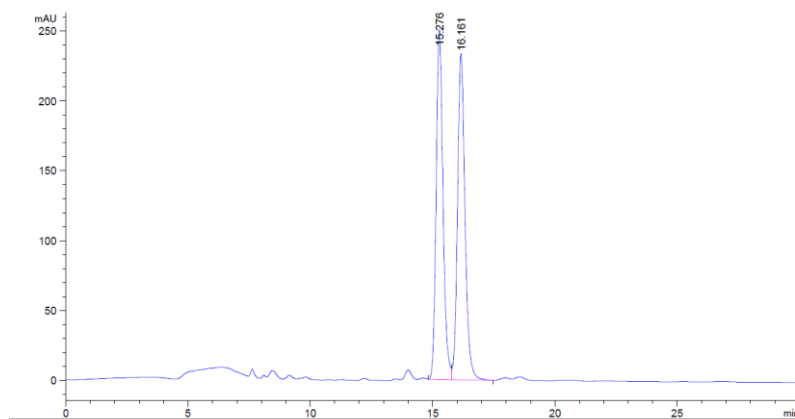

=====  
 Area Percent Report  
 =====

Sorted By : Signal  
 Multiplier : 1.0000  
 Dilution : 1.0000  
 Use Multiplier & Dilution Factor with ISTDs

Signal 1: VWD1 A, Wavelength=250 nm

| Peak # | RetTime [min] | Type | Width [min] | Area [mAU*s] | Height [mAU] | Area %  |
|--------|---------------|------|-------------|--------------|--------------|---------|
| 1      | 15.276        | VV   | 0.2986      | 4870.37109   | 250.01653    | 49.5778 |
| 2      | 16.161        | VB   | 0.3233      | 4953.32080   | 233.38797    | 50.4222 |

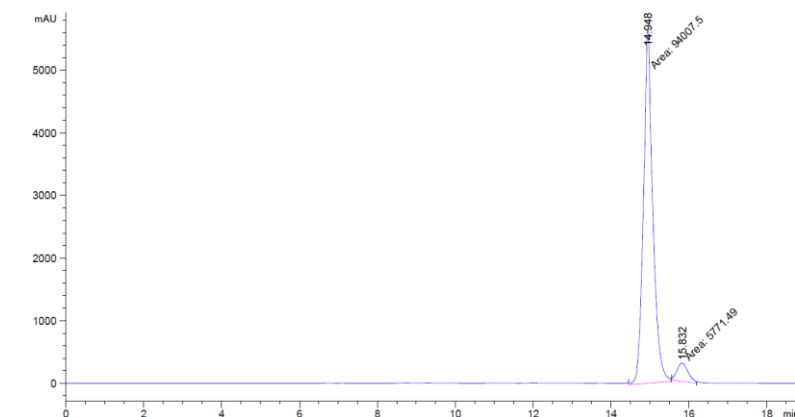

=====  
 Area Percent Report  
 =====

Sorted By : Signal  
 Multiplier : 1.0000  
 Dilution : 1.0000  
 Use Multiplier & Dilution Factor with ISTDs

Signal 1: VWD1 A, Wavelength=250 nm

| Peak # | RetTime [min] | Type | Width [min] | Area [mAU*s] | Height [mAU] | Area %  |
|--------|---------------|------|-------------|--------------|--------------|---------|
| 1      | 14.948        | MM   | 0.2780      | 9.40075e4    | 5635.32910   | 94.2157 |
| 2      | 15.832        | MM   | 0.3288      | 5771.49170   | 292.51791    | 5.7843  |

**(R)-N-(2-Fluoro-2-(quinolin-2-yl)ethyl)-2,3-dihydrobenzofuran-5-amine 7I**

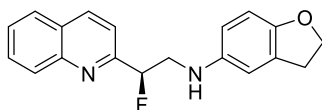

Prepared according to General Procedure A using 2-(1-fluorovinyl)quinoline (17.3 mg, 0.10 mmol, 1.0 equiv), 2,3-dihydrobenzofuran-5-amine (40.5 mg, 0.30 mmol, 3.0 equiv), (*S*)-TRIP catalyst (15.1 mg,

0.02 mmol, 20 mol%), and THF (200  $\mu$ L, 0.5 M) at  $-20^{\circ}\text{C}$  for 5 d. The reaction mixture was subjected to the purification outlined in General Procedure A (silica gel, EtOAc:petroleum ether, 5:95 to 10:100) to afford the desired product as a pale yellow oil (11.4 mg, 37%).

$\nu_{\text{max}}$  (film): 3376 (br), 3051, 2954, 2921, 2887, 2850, 1491, 1216  $\text{cm}^{-1}$ .

$^1\text{H NMR}$  (400 MHz,  $\text{CDCl}_3$ ):  $\delta$  8.22 (d,  $J = 8.5$  Hz, 1H), 8.09 (dd,  $J = 8.6, 1.1$  Hz, 1H), 7.84 (dd,  $J = 8.2, 1.4$  Hz, 1H), 7.75 (ddd,  $J = 8.4, 6.8, 1.5$  Hz, 1H), 7.63 (dd,  $J = 8.5, 1.5$  Hz, 1H), 7.57 (ddd,  $J = 8.1, 6.8, 1.2$  Hz, 1H), 6.70 – 6.62 (m, 2H), 6.51 (dd,  $J = 8.5, 2.5$  Hz, 1H), 5.89 (ddd,  $^2J_{\text{HF}} = 48.7$  Hz,  $J = 7.4, 3.7$  Hz, 1H), 4.55 – 4.39 (m, 2H), 3.86 (ddd,  $^3J_{\text{HF}} = 26.5$  Hz,  $^2J_{\text{HH}} = 13.9$  Hz,  $J = 3.7$  Hz, 1H), 3.67 (ddd,  $^3J_{\text{HF}} = 19.6$  Hz,  $^2J_{\text{HH}} = 13.9$  Hz,  $J = 7.4$  Hz, 1H), 3.19 – 3.01 (m, 2H).

$^{13}\text{C NMR}$  (101 MHz,  $\text{CDCl}_3$ ):  $\delta$  158.3 (d,  $^2J = 24.8$  Hz), 153.2, 147.5, 141.9, 137.2, 130.0, 129.3, 128.0, 127.8, 126.9, 118.0, 117.9, 113.6, 111.5, 109.5, 93.4 (d,  $^1J = 174.2$  Hz), 71.1, 50.2 (d,  $^2J = 22.2$  Hz), 30.4.

$^{19}\text{F NMR}$  (376 MHz,  $\text{CDCl}_3$ ):  $\delta -191.64$ .

HRMS (NSI): exact mass calculated for  $[\text{M}+\text{H}]^+$  ( $\text{C}_{19}\text{H}_{18}\text{ON}_2\text{F}$ ) requires  $m/z$  309.1398, found  $m/z$  309.1401.

The enantiomeric purity of the product was determined by HPLC analysis: 89:11 e.r. (Chiralcel OJ-H, hexane/*i*-PrOH = 50/50, flow rate 0.5 mL/min,  $\lambda = 250$  nm),  $t_r$  (major) = 55.0 min,  $t_r$  (minor) = 60.2 min;

$[\alpha]_{\text{D}}^{20} = +2.5$  ( $c$  0.57,  $\text{CHCl}_3$ ).

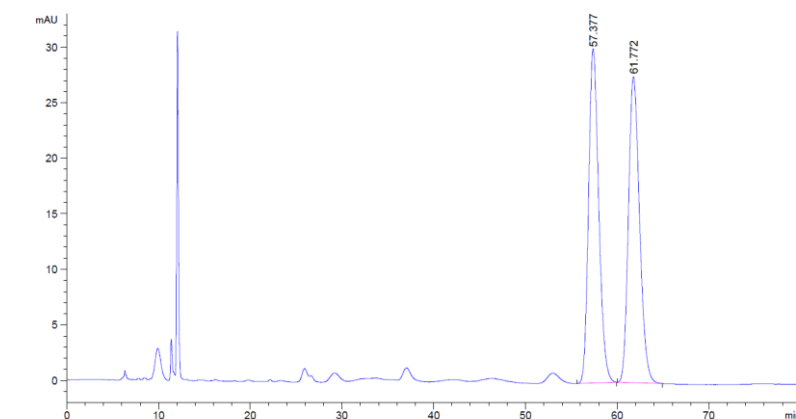

=====  
Area Percent Report  
=====

Sorted By : Signal  
Multiplier : 1.0000  
Dilution : 1.0000  
Use Multiplier & Dilution Factor with ISTDs

Signal 1: WVD1 A, Wavelength=250 nm

| Peak # | RetTime [min] | Type | Width [min] | Area [mAU*s] | Height [mAU] | Area %  |
|--------|---------------|------|-------------|--------------|--------------|---------|
| 1      | 57.377        | BB   | 1.1785      | 2316.01807   | 30.10777     | 50.0123 |
| 2      | 61.772        | BB   | 1.2849      | 2314.87866   | 27.54219     | 49.9877 |

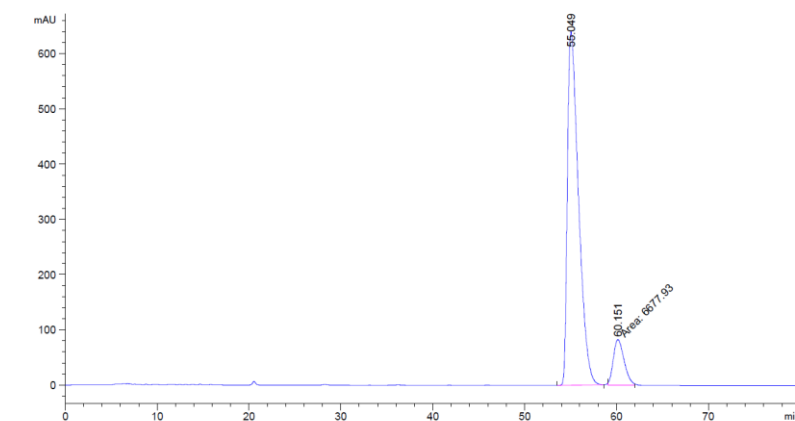

=====  
 Area Percent Report  
 =====

Sorted By : Signal  
 Multiplier : 1.0000  
 Dilution : 1.0000  
 Use Multiplier & Dilution Factor with ISTDs

Signal 1: VWD1 A, Wavelength=250 nm

| Peak # | RetTime [min] | Type | Width [min] | Area [mAU*s] | Height [mAU] | Area %  |
|--------|---------------|------|-------------|--------------|--------------|---------|
| 1      | 55.049        | BB   | 1.2743      | 5.37853e4    | 640.15222    | 88.9554 |
| 2      | 60.151        | MM   | 1.3544      | 6677.92578   | 82.17638     | 11.0446 |

**(R)-2-(1-Fluoro-2-(indolin-1-yl)ethyl)quinoline 7m**

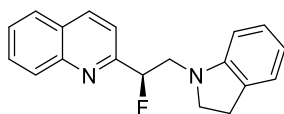

Prepared according to General Procedure B using 2-(1-fluorovinyl)quinoline (17.3 mg, 0.10 mmol, 1.0 equiv), indoline (35.7 mg, 0.30 mmol, 3.0 equiv), (*S*)-TRIP catalyst (15.1 mg, 0.02 mmol, 20 mol%), and CPME (200  $\mu$ L, 0.5 M). The reaction mixture was subjected to the purification outlined in General Procedure B (silica gel, EtOAc:petroleum ether, 5:95 to 10:100) to afford the desired product as a pale yellow solid (26.9 mg, 92%).

$\nu_{\text{max}}$  (film): 3048, 3024, 2949, 2922, 2845, 1607, 1599, 1489, 1244, 742  $\text{cm}^{-1}$ .

$^1\text{H}$  NMR (400 MHz,  $\text{CDCl}_3$ ):  $\delta$  8.22 (d,  $J$  = 8.5 Hz, 1H), 8.12 (d,  $J$  = 8.4 Hz, 1H), 7.84 (dd,  $J$  = 8.2, 0.9 Hz, 1H), 7.75 (ddd,  $J$  = 8.4, 6.9, 1.4 Hz, 1H), 7.67 (dd,  $J$  = 8.5, 1.4 Hz, 1H), 7.57 (ddd,  $J$  = 8.1, 6.9, 1.1 Hz, 1H), 7.09 – 7.00 (m, 2H), 6.65 (td,  $J$  = 7.4, 0.8 Hz, 1H), 6.56 (d,  $J$  = 7.8 Hz, 1H), 5.98 (ddd,  $^2J_{\text{HF}}$  = 48.7 Hz,  $J$  = 6.8, 2.9 Hz, 1H), 3.86 (ddd,  $^3J_{\text{HF}}$  = 28.6 Hz,  $^2J_{\text{HH}}$  = 15.1 Hz,  $J$  = 2.9 Hz, 1H), 3.72 (ddd,  $^3J_{\text{HF}}$  = 24.0 Hz,  $^2J_{\text{HH}}$  = 15.1 Hz,  $J$  = 6.8 Hz, 1H), 3.56 (q,  $J$  = 8.3 Hz, 1H), 3.48 (qd,  $J$  = 8.7, 0.8 Hz, 1H), 2.98 (t,  $J$  = 8.4 Hz, 2H).

$^{13}\text{C}$  NMR (101 MHz,  $\text{CDCl}_3$ ):  $\delta$  158.5 (d,  $^2J$  = 24.8 Hz), 152.3, 147.6, 137.1, 130.0, 129.6, 129.4, 127.9, 127.8, 127.5, 126.8, 124.5, 118.1 (d,  $^3J$  = 6.2 Hz), 117.8, 106.9, 94.7 (d,  $^1J$  = 176.7 Hz), 54.9, 54.8 (d,  $^2J$  = 20.9 Hz), 28.9.

$^{19}\text{F}$  NMR (376 MHz,  $\text{CDCl}_3$ ):  $\delta$  -187.59.

HRMS (NSI): exact mass calculated for  $[\text{M}+\text{H}]^+$  ( $\text{C}_{19}\text{H}_{18}\text{N}_2\text{F}$ ) requires  $m/z$  293.1449, found  $m/z$  293.1450.

The enantiomeric purity of the product was determined by HPLC analysis: 92:8 e.r. (Chiralcel OJ-H, hexane/*i*-PrOH = 50/50, flow rate 0.5 mL/min,  $\lambda = 250$  nm),  $t_r$  (major) = 24.9 min,  $t_r$  (minor) = 24.0 min;

$$[\alpha]_D^{20} = +21.7 (c 1.35, \text{CHCl}_3).$$

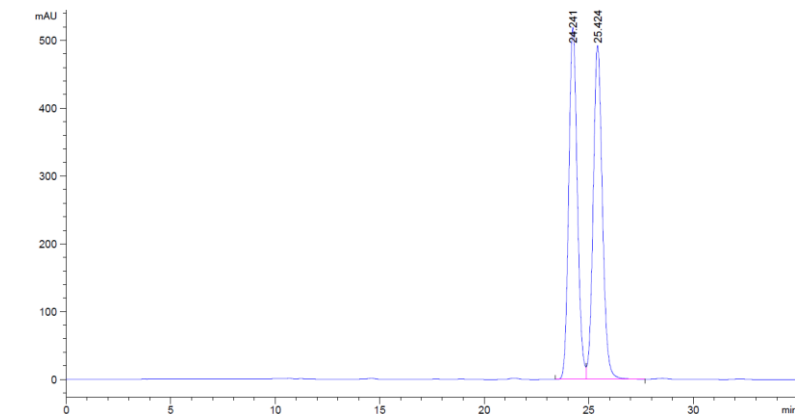

```

=====
                        Area Percent Report
=====
Sorted By      :      Signal
Multiplier     :      1.0000
Dilution      :      1.0000
Use Multiplier & Dilution Factor with ISTDs
  
```

```

Signal 1: VWd1 A, Wavelength=250 nm

```

| Peak # | RetTime [min] | Type | Width [min] | Area [mAU*s] | Height [mAU] | Area %  |
|--------|---------------|------|-------------|--------------|--------------|---------|
| 1      | 24.241        | BV   | 0.4392      | 1.47304e4    | 518.54968    | 49.4921 |
| 2      | 25.424        | VB   | 0.4713      | 1.50327e4    | 492.28079    | 50.5079 |

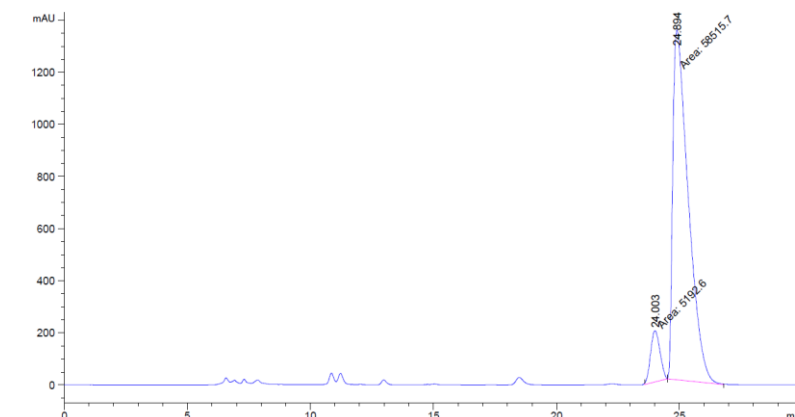

```

=====
                        Area Percent Report
=====
Sorted By      :      Signal
Multiplier     :      1.0000
Dilution      :      1.0000
Use Multiplier & Dilution Factor with ISTDs
  
```

```

Signal 1: VWd1 A, Wavelength=250 nm

```

| Peak # | RetTime [min] | Type | Width [min] | Area [mAU*s] | Height [mAU] | Area %  |
|--------|---------------|------|-------------|--------------|--------------|---------|
| 1      | 24.003        | MM   | 0.4411      | 5192.60156   | 196.21417    | 8.1506  |
| 2      | 24.894        | MM   | 0.7268      | 5.85157e4    | 1341.82629   | 91.8494 |

(*R*)-*N*-(2-Fluoro-2-(3-methylquinolin-2-yl)ethyl)aniline **7n**

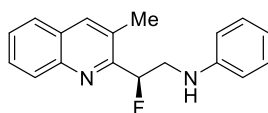

Prepared according to General Procedure B using 3-methyl-2-(1-fluorovinyl)quinoline (18.8 mg, 0.10 mmol, 1.0 equiv), aniline (27  $\mu$ L, 0.30 mmol, 3.0 equiv), (*S*)-TRIP catalyst (15.1 mg, 0.02 mmol, 20 mol%), and CPME (200  $\mu$ L, 0.5 M) at  $-10$   $^{\circ}$ C for 3 d. The reaction mixture was subjected to the purification outlined the General Procedure B (silica gel, EtOAc:petroleum ether, 5:95 to 1:100) to afford the desired product as a pale yellow solid (13.8 mg, 50%).

$\nu_{\max}$  (film): 1603, 1506, 1497, 1447, 1325, 1261, 750, 692  $\text{cm}^{-1}$ .

$^1\text{H NMR}$  (500 MHz,  $\text{CDCl}_3$ ):  $\delta$  8.12 (d,  $J = 8.4$  Hz, 1H), 7.96 (s, 1H), 7.76 (d,  $J = 8.1$  Hz, 1H), 7.69 (t,  $J = 7.6$  Hz, 1H), 7.55 (t,  $J = 7.5$  Hz, 1H), 7.21 (t,  $J = 7.8$  Hz, 2H), 6.74 (dd,  $J = 10.9, 7.9$  Hz, 3H), 6.00 (ddd,  $^2J_{\text{HF}} = 48.1$  Hz,  $J = 7.2, 4.9$  Hz, 1H), 4.41 (s, 1H), 4.12 – 3.91 (m, 2H), 2.58 (s, 3H).

$^{13}\text{C NMR}$  (126 MHz,  $\text{CDCl}_3$ ):  $\delta$  155.2 (d,  $^3J = 18.1$  Hz), 147.7, 146.0, 137.3, 129.9, 129.5, 129.4, 129.0, 128.2, 127.2, 126.8, 117.9, 113.2, 90.2 (d,  $^1J = 172.8$  Hz), 46.2 (d,  $^2J = 24.6$  Hz), 18.6 (d,  $^4J = 3.3$  Hz).

$^{19}\text{F NMR}$  (376 MHz,  $\text{CDCl}_3$ ):  $\delta$   $-183.72$ .

HRMS (ESI): exact mass calculated for  $[\text{M}+\text{H}]^+$  ( $\text{C}_{18}\text{H}_{18}\text{FN}_2$ ) requires  $m/z$  281.1449, found  $m/z$  281.1441.

The enantiomeric purity of the product was determined by HPLC analysis: 91:9 e.r. (Chiralcel OJ-H, hexane/*i*-PrOH = 50/50, flow rate 1.0 mL/min,  $\lambda = 250$  nm),  $t_r$  (major) = 28.8 min,  $t_r$  (minor) = 45.1 min;

$[\alpha]_{\text{D}}^{20} = -71.9$  ( $c$  0.21, in  $\text{CHCl}_3$ ).

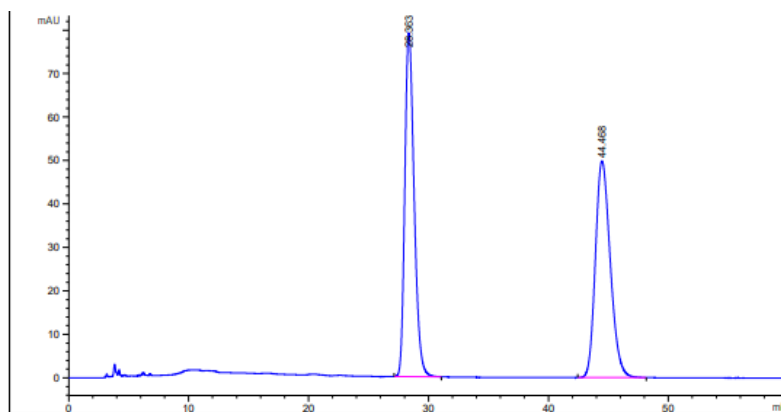

Area Percent Report

Sorted By : Signal  
Multiplier : 1.0000  
Dilution : 1.0000  
Use Multiplier & Dilution Factor with ISTDs

Signal 1: VWD1 A, Wavelength=250 nm

| Peak # | RetTime [min] | Type | Width [min] | Area [mAU*s] | Height [mAU] | Area %  |
|--------|---------------|------|-------------|--------------|--------------|---------|
| 1      | 28.363        | BB   | 0.8188      | 4269.78467   | 79.12798     | 49.9060 |
| 2      | 44.468        | BB   | 1.2874      | 4285.86523   | 49.82888     | 50.0940 |

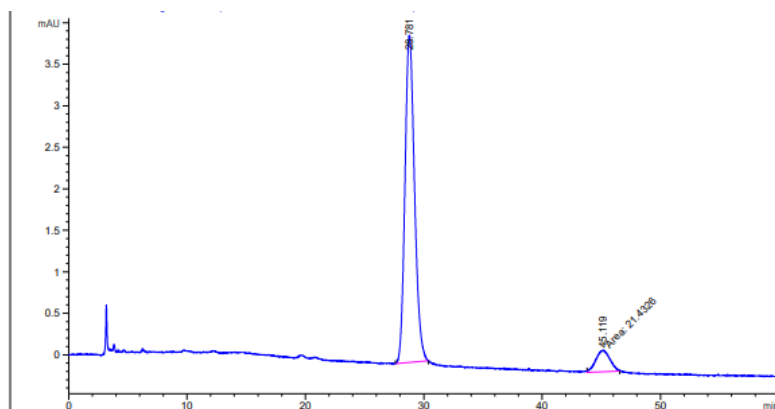

Area Percent Report

Sorted By : Signal  
Multiplier : 1.0000  
Dilution : 1.0000  
Use Multiplier & Dilution Factor with ISTDs

Signal 1: VWD1 A, Wavelength=250 nm

| Peak # | RetTime [min] | Type | Width [min] | Area [mAU*s] | Height [mAU] | Area %  |
|--------|---------------|------|-------------|--------------|--------------|---------|
| 1      | 28.781        | BB   | 0.8186      | 221.00998    | 3.94218      | 91.1597 |
| 2      | 45.119        | MM   | 1.3857      | 21.43265     | 2.57792e-1   | 8.8403  |

*(R)*-*N*-(2-Fluoro-2-(6-fluoroquinolin-2-yl)ethyl)aniline **7o**

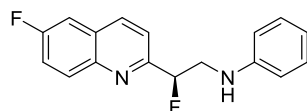

Prepared according to General Procedure B using 6-fluoro-2-(1-fluorovinyl)quinoline (19.1 mg, 0.10 mmol, 1.0 equiv), aniline (27  $\mu$ L, 0.30 mmol, 3.0 equiv), (*S*)-TRIP catalyst (15.1 mg, 0.02 mmol, 20

mol%), and CPME (200  $\mu$ L, 0.5 M) at  $-10$   $^{\circ}$ C for 3 d. The reaction mixture was subjected to the purification outlined in General Procedure B (silica gel, EtOAc:petroleum ether, 5:95 to 10:100) to afford the desired product as a pale brown oil (18.9 mg, 67%).

$\nu_{\max}$  (film): 1603, 1506, 1323, 1260, 1231, 1142, 1061, 872, 833, 750, 692  $\text{cm}^{-1}$ .

$^1\text{H}$  NMR (400 MHz,  $\text{CDCl}_3$ ):  $\delta$  8.17 (d,  $J$  = 8.6 Hz, 1H), 8.10 (dd,  $J$  = 9.2, 5.3 Hz, 1H), 7.65 (d,  $J$  = 8.5 Hz, 1H), 7.52 (td,  $J$  = 8.7, 2.8 Hz, 1H), 7.46 (dd,  $J$  = 8.8, 2.8 Hz, 1H), 7.19 (t,  $J$  = 7.8 Hz, 2H), 6.78 – 6.70 (m, 3H), 5.88 (ddd,  $^2J_{\text{HF}}$  = 48.6 Hz,  $J$  = 7.3, 3.6 Hz, 1H), 3.94 (ddd,  $^3J_{\text{HF}}$  = 26.4 Hz,  $^2J_{\text{HH}}$  = 14.1 Hz,  $J$  = 3.7 Hz, 1H), 3.72 (ddd,  $^3J_{\text{HF}}$  = 20.0 Hz,  $^2J_{\text{HH}}$  = 14.1 Hz,  $J$  = 7.3 Hz, 1H).

$^{13}\text{C}$  NMR (101 MHz,  $\text{CDCl}_3$ ):  $\delta$  160.7 (d,  $^1J$  = 248.7 Hz), 157.6 (d,  $^4J$  = 2.5 Hz), 157.4 (d,  $^4J$  = 2.9 Hz), 147.6, 144.6, 136.6 (d,  $^3J$  = 5.5 Hz), 131.9 (d,  $^3J$  = 9.2 Hz), 129.5, 120.4 (d,  $^2J$  = 25.8 Hz), 118.7 (d,  $^3J$  = 6.4 Hz), 118.2, 113.4, 110.8 (d,  $^2J$  = 21.7 Hz), 93.2 (d,  $^1J$  = 174.5 Hz), 48.5 (d,  $^2J$  = 22.4 Hz).

$^{19}\text{F}$  NMR (376 MHz,  $\text{CDCl}_3$ ):  $\delta$   $-112.80$ ,  $-191.35$ .

HRMS (ESI): exact mass calculated for  $[\text{M}+\text{H}]^+$  ( $\text{C}_{17}\text{H}_{15}\text{F}_2\text{N}_2$ ) requires  $m/z$  285.1198, found  $m/z$  285.1190.

The enantiomeric purity of the product was determined by HPLC analysis: 94:6 e.r. (Chiralpak IA, hexane/*i*-PrOH = 50/50, flow rate 0.5 mL/min,  $\lambda$  = 250 nm),  $t_r$  (major) = 11.4 min,  $t_r$  (minor) = 12.1 min;

$[\alpha]_{\text{D}}^{20}$  =  $+40.0$  ( $c$  0.10,  $\text{CHCl}_3$ ).

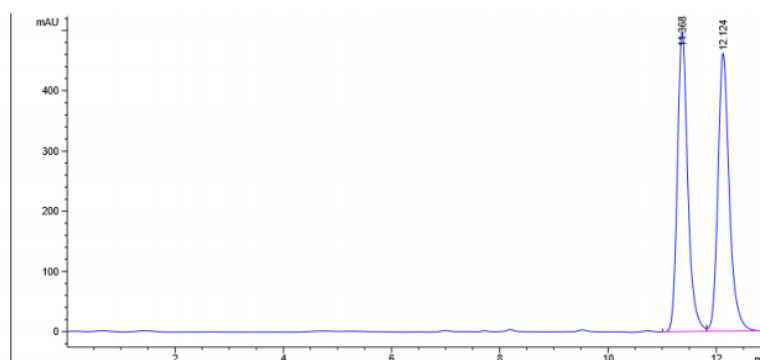

=====  
Area Percent Report  
=====

Sorted By : Signal  
Multiplier: : 1.0000  
Dilution: : 1.0000  
Use Multiplier & Dilution Factor with ISTDs

Signal 1: DAD1 A, Sig=254,4 Ref=360,100

| Peak # | RetTime [min] | Type | Width [min] | Area [mAU*s] | Height [mAU] | Area %  |
|--------|---------------|------|-------------|--------------|--------------|---------|
| 1      | 11.368        | VV   | 0.2018      | 6660.14502   | 498.86203    | 49.7094 |
| 2      | 12.124        | VB   | 0.2223      | 6738.01025   | 461.47482    | 50.2906 |



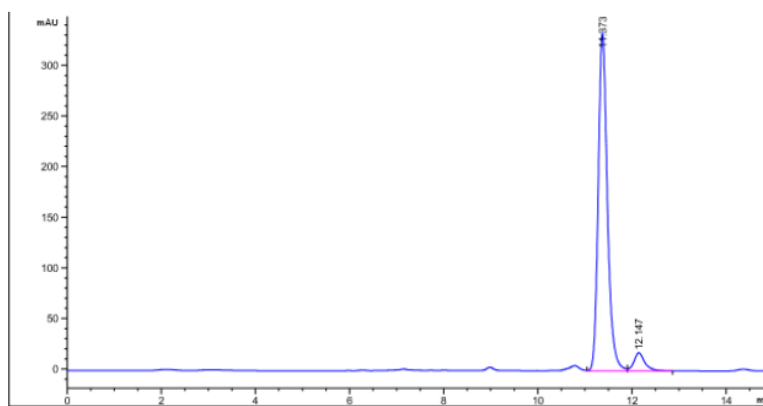

=====  
Area Percent Report  
=====

Sorted By : Signal  
Multiplier : 1.0000  
Dilution : 1.0000  
Use Multiplier & Dilution Factor with ISTDs

Signal 1: VWD1 A, Wavelength=250 nm

| Peak # | RetTime [min] | Type | Width [min] | Area [mAU*s] | Height [mAU] | Area %  |
|--------|---------------|------|-------------|--------------|--------------|---------|
| 1      | 11.373        | VV   | 0.2056      | 4506.97461   | 333.68134    | 94.0452 |
| 2      | 12.147        | VB   | 0.2389      | 285.37711    | 17.71371     | 5.9548  |

*(R)*-*N*-(2-(6-Bromoquinolin-2-yl)-2-fluoroethyl)aniline **7p**

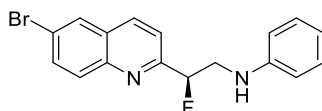

Prepared according to General Procedure B using 6-bromo-2-(1-fluorovinyl)quinoline (25.2 mg, 0.10 mmol, 1.0 equiv), aniline (27  $\mu$ L, 0.30 mmol, 3.0 equiv), (*S*)-TRIP catalyst (15.1 mg, 0.02 mmol, 20 mol%), and CPME (200  $\mu$ L, 0.5 M) at  $-10$   $^{\circ}$ C for 3 d. The reaction mixture was subjected to the purification outlined in General Procedure B (silica gel, EtOAc:petroleum ether, 5:95 to 10:100) to afford the desired product as a pale brown oil (33.1 mg, 96%).

$\nu_{\max}$  (film): 1603, 1508, 1491, 1059, 831, 750, 692  $\text{cm}^{-1}$ .

$^1\text{H}$  NMR (400 MHz,  $\text{CDCl}_3$ ):  $\delta$  8.13 (d,  $J = 8.5$  Hz, 1H), 8.00 (d,  $J = 2.2$  Hz, 1H), 7.96 (d,  $J = 9.0$  Hz, 1H), 7.81 (dd,  $J = 9.0, 2.2$  Hz, 1H), 7.65 (d,  $J = 8.5$  Hz, 1H), 7.19 (t,  $J = 7.8$  Hz, 2H), 6.78 – 6.69 (m, 3H), 5.87 (ddd,  $^2J_{\text{HF}} = 48.7$  Hz,  $J = 7.3, 3.6$  Hz, 1H), 4.25 (s, 1H), 3.95 (ddd,  $^3J_{\text{HF}} = 26.4$  Hz,  $^2J_{\text{HH}} = 14.1$  Hz,  $J = 3.6$  Hz, 1H), 3.71 (ddd,  $^3J_{\text{HF}} = 20.9$  Hz,  $^2J_{\text{HH}} = 14.1$  Hz,  $J = 7.3$  Hz, 1H).

$^{13}\text{C}$  NMR (101 MHz,  $\text{CDCl}_3$ ):  $\delta$  158.6 (d,  $^2J = 24.8$  Hz), 147.5, 146.1 (d,  $^4J = 2.4$  Hz), 136.2, 133.5, 131.1, 129.9, 129.5, 128.9, 120.8, 118.8 (d,  $^3J = 6.6$  Hz), 118.3, 113.4, 93.2 (d,  $^1J = 174.8$  Hz), 48.5 (d,  $^2J = 22.2$  Hz).

$^{19}\text{F}$  NMR (376 MHz,  $\text{CDCl}_3$ ):  $\delta$  -191.78.

HRMS (ESI): exact mass calculated for  $[\text{M}+\text{H}]^+$  ( $\text{C}_{17}\text{H}_{15}\text{BrFN}_2$ ) requires  $m/z$  345.0397, found  $m/z$  345.0393.

The enantiomeric purity of the product was determined by HPLC analysis: 93:7 e.r. (Chiralpak IA, hexane/*i*-PrOH = 50/50, flow rate 0.5 mL/min,  $\lambda = 250$  nm),  $t_r$  (major) = 12.7 min,  $t_r$  (minor) = 13.4 min;

$$[\alpha]_D^{20} = +11.8 (c 1.15, \text{CHCl}_3).$$

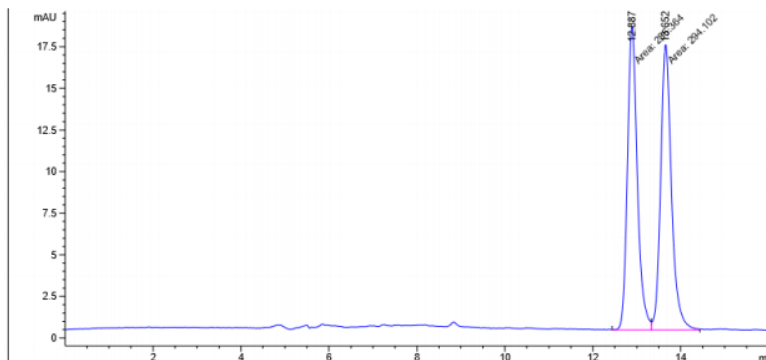

=====  
 Area Percent Report  
 =====

Sorted By : Signal  
 Multiplier: : 1.0000  
 Dilution: : 1.0000  
 Use Multiplier & Dilution Factor with ISTDs

Signal 1: DAD1 A, Sig=254,4 Ref=360,100

| Peak # | RetTime [min] | Type | Width [min] | Area [mAU*s] | Height [mAU] | Area %  |
|--------|---------------|------|-------------|--------------|--------------|---------|
| 1      | 12.887        | MF   | 0.2617      | 286.36404    | 18.24028     | 49.3335 |
| 2      | 13.652        | FM   | 0.2859      | 294.10202    | 17.14728     | 50.6665 |

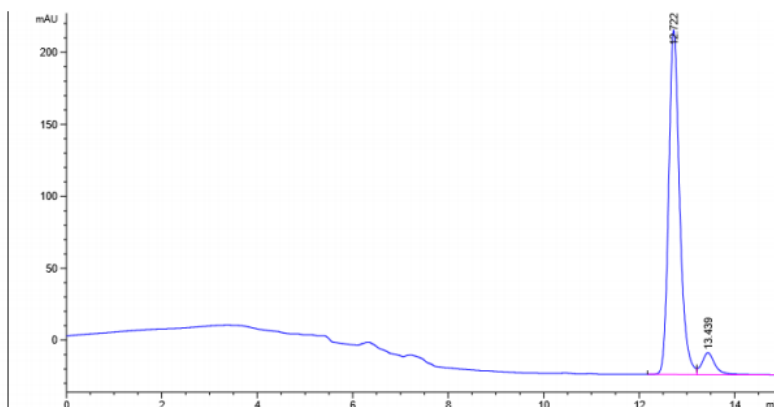

=====  
 Area Percent Report  
 =====

Sorted By : Signal  
 Multiplier : 1.0000  
 Dilution : 1.0000  
 Use Multiplier & Dilution Factor with ISTDs

Signal 1: WVD1 A, Wavelength=250 nm

| Peak # | RetTime [min] | Type | Width [min] | Area [mAU*s] | Height [mAU] | Area %  |
|--------|---------------|------|-------------|--------------|--------------|---------|
| 1      | 12.722        | BV   | 0.2429      | 3816.47534   | 239.22588    | 92.9299 |
| 2      | 13.439        | VBA  | 0.2828      | 290.35831    | 15.18612     | 7.0701  |

(*R*)-*N*-(2-(4-Bromoquinolin-2-yl)-2-fluoroethyl)aniline **7q**

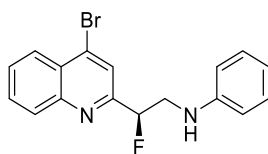

Prepared according to General Procedure A using 4-bromo-2-(1-fluorovinyl)quinoline (25.2 mg, 0.10 mmol, 1.0 equiv), aniline (27  $\mu$ L, 0.30 mmol, 3.0 equiv), (*S*)-TRIP catalyst (15.1 mg, 0.02 mmol, 20 mol%), and THF (200  $\mu$ L, 0.5 M). The reaction mixture was subjected to the purification outlined in General Procedure A (silica gel, EtOAc:petroleum ether, 5:95 to 10:90) to afford the desired product as a pale yellow solid (33.1 mg, 96%).

$\nu_{\text{max}}$  (film): 1603, 1508, 1491, 1319, 1261, 1186, 1059, 880, 831, 750, 692  $\text{cm}^{-1}$ .

$^1\text{H NMR}$  (500 MHz,  $\text{CDCl}_3$ ):  $\delta$  8.20 (dd,  $J = 8.4, 1.4$  Hz, 1H), 8.09 (d,  $J = 8.4$  Hz, 1H), 7.94 (d,  $J = 1.5$  Hz, 1H), 7.80 (ddd,  $J = 8.4, 6.9, 1.4$  Hz, 1H), 7.66 (ddd,  $J = 8.3, 6.9, 1.2$  Hz, 1H), 7.19 (t,  $J = 7.7$  Hz, 2H), 6.78 – 6.71 (m, 3H), 5.86 (ddd,  $^2J_{\text{HF}} = 48.6$  Hz,  $J = 7.3, 3.6$  Hz, 1H), 3.95 (ddd,  $^3J_{\text{HF}} = 26.4$  Hz,  $^2J_{\text{HH}} = 14.2$  Hz,  $J = 3.6$  Hz, 1H), 3.78 – 3.66 (m, 1H).

$^{13}\text{C NMR}$  (126 MHz,  $\text{CDCl}_3$ ):  $\delta$  158.0 (d,  $^2J = 25.0$  Hz), 148.1, 147.5, 135.4, 131.0, 129.8, 129.5, 128.2, 127.4, 127.0, 122.0 (d,  $^3J = 7.5$  Hz), 118.3, 113.5, 92.7 (d,  $^1J = 175.8$  Hz), 48.5 (d,  $^2J = 21.9$  Hz).

$^{19}\text{F NMR}$  (470 MHz,  $\text{CDCl}_3$ ):  $\delta$  -192.02.

HRMS (ESI): exact mass calculated for  $[\text{M}+\text{H}]^+$  ( $\text{C}_{17}\text{H}_{15}\text{BrFN}_2$ ) requires  $m/z$  345.0397, found  $m/z$  345.0394.

The enantiomeric purity of the product was determined by HPLC analysis: 98:2 e.r. (Chiralcel OJ-H, hexane/*i*-PrOH = 50/50, flow rate 1.0 mL/min,  $\lambda = 250$  nm),  $t_r$  (major) = 24.4 min,  $t_r$  (minor) = 20.5 min;

$[\alpha]_{\text{D}}^{20} = +30.7$  ( $c$  0.27,  $\text{CHCl}_3$ ).

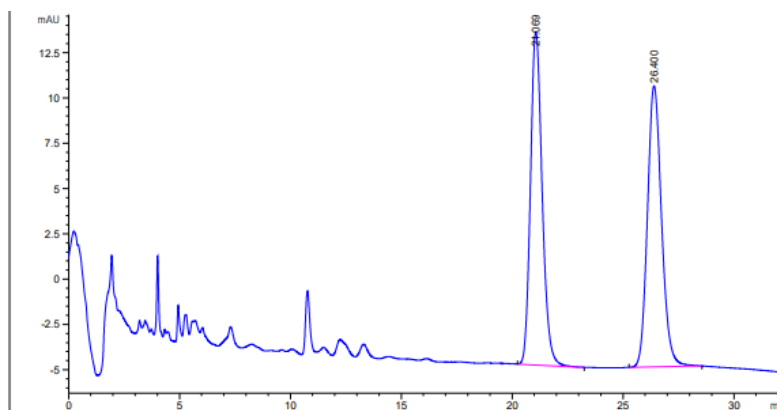

Area Percent Report

Sorted By : Signal  
Multiplier : 1.0000  
Dilution : 1.0000  
Use Multiplier & Dilution Factor with ISTDs

Signal 1: VWD1 A, Wavelength=250 nm

| Peak # | RetTime [min] | Type | Width [min] | Area [mAU*s] | Height [mAU] | Area %  |
|--------|---------------|------|-------------|--------------|--------------|---------|
| 1      | 21.069        | BB   | 0.5653      | 673.27606    | 18.39787     | 49.5390 |
| 2      | 26.400        | BB   | 0.6788      | 685.80560    | 15.51562     | 50.4610 |

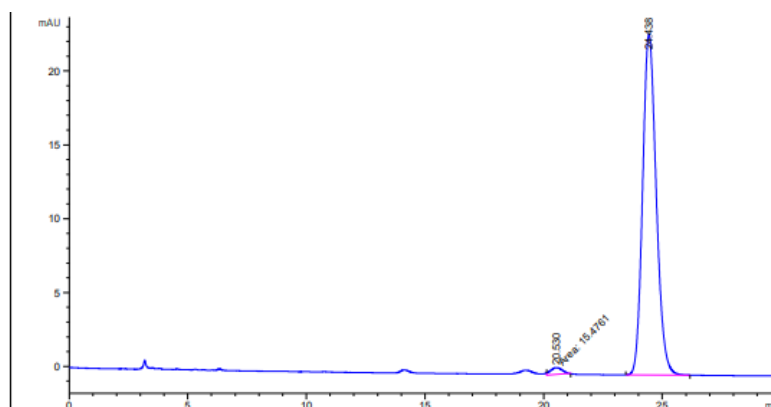

Area Percent Report

Sorted By : Signal  
Multiplier : 1.0000  
Dilution : 1.0000  
Use Multiplier & Dilution Factor with ISTDs

Signal 1: VWD1 A, Wavelength=250 nm

| Peak # | RetTime [min] | Type | Width [min] | Area [mAU*s] | Height [mAU] | Area %  |
|--------|---------------|------|-------------|--------------|--------------|---------|
| 1      | 20.530        | MM   | 0.5559      | 15.47610     | 4.63965e-1   | 1.6550  |
| 2      | 24.438        | BB   | 0.6148      | 919.65417    | 23.08324     | 98.3450 |

(*R*)-*N*-(2-Fluoro-2-(quinoxalin-2-yl)ethyl)aniline **7r**

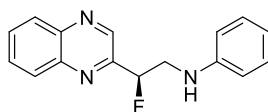

Prepared according to General Procedure B using 2-(1-fluorovinyl)quinoxaline (17.4 mg, 0.10 mmol, 1.0 equiv), aniline (27  $\mu$ L, 0.30 mmol, 3.0 equiv), (*S*)-TRIP catalyst (15.1 mg, 0.02 mmol, 20 mol%),

and CPME (200  $\mu$ L, 0.5 M) at  $-10$   $^{\circ}$ C for 3 d. The reaction mixture was subjected to the purification outlined in General Procedure B (silica gel, EtOAc:petroleum ether, 5:95 to 10:90) to afford the desired product as a pale brown oil (23.3 mg, 87%)

$\nu_{\max}$  (film): 1603, 1495, 1063, 750, 692  $\text{cm}^{-1}$ .

$^1\text{H}$  NMR (400 MHz,  $\text{CDCl}_3$ ):  $\delta$  9.07 (s, 1H), 8.17 – 8.08 (m, 2H), 7.81 (qd,  $J = 7.0, 3.4$  Hz, 2H), 7.19 (t,  $J = 7.9$  Hz, 2H), 6.78 – 6.70 (m, 3H), 5.97 (ddd,  $^2J_{\text{HF}} = 48.1$  Hz,  $J = 7.1, 3.5$  Hz, 1H), 4.00 (ddd,  $^3J_{\text{HF}} = 26.1$  Hz,  $^2J_{\text{HH}} = 14.4$  Hz,  $J = 3.6$  Hz, 1H), 3.79 (ddd,  $^3J_{\text{HF}} = 21.3$  Hz,  $^2J_{\text{HH}} = 14.4$  Hz,  $J = 7.1$  Hz, 1H).

$^{13}\text{C}$  NMR (101 MHz,  $\text{CDCl}_3$ ):  $\delta$  152.4 (d,  $^2J = 24.2$  Hz), 147.3, 142.8 (d,  $^3J = 7.3$  Hz), 142.5, 141.5, 130.7, 130.4, 129.6, 129.5, 129.4, 118.5, 113.5, 92.3 (d,  $^1J = 174.1$  Hz), 48.2 (d,  $^2J = 22.0$  Hz).

$^{19}\text{F}$  NMR (376 MHz,  $\text{CDCl}_3$ ):  $\delta$   $-193.73$ .

HRMS (ESI): exact mass calculated for  $[\text{M}+\text{H}]^+$  ( $\text{C}_{16}\text{H}_{15}\text{FN}_3$ ) requires  $m/z$  268.1245, found  $m/z$  268.1243.

The enantiomeric purity of the product was determined by HPLC analysis: 92:8 e.r. (Chiralcel OJ-H, hexane/*i*-PrOH = 50/50, flow rate 0.5 mL/min,  $\lambda = 250$  nm),  $t_r$  (major) = 36.3 min,  $t_r$  (minor) = 42.2 min;

$[\alpha]_{\text{D}}^{20} = +5.4$  ( $c$  0.13,  $\text{CHCl}_3$ ).

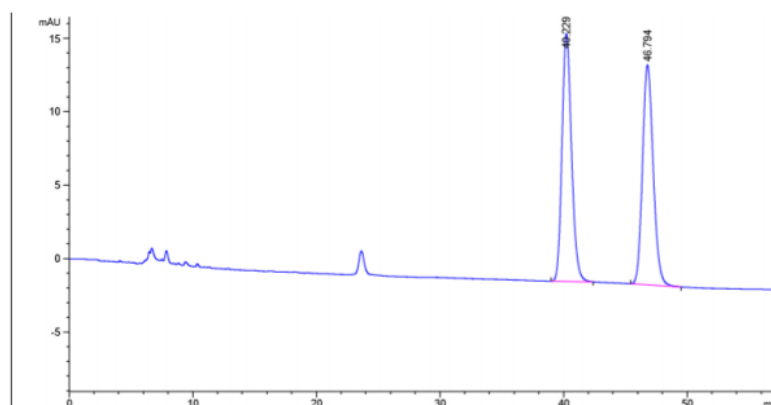

Area Percent Report

Sorted By : Signal  
Multiplier : 1.0000  
Dilution : 1.0000  
Use Multiplier & Dilution Factor with ISTDs

Signal 1: VwD1 A, Wavelength=250 nm

| Peak # | RetTime [min] | Type | Width [min] | Area [mAU*s] | Height [mAU] | Area %  |
|--------|---------------|------|-------------|--------------|--------------|---------|
| 1      | 40.229        | BB   | 0.8238      | 902.49066    | 16.86399     | 49.9839 |
| 2      | 46.794        | BB   | 0.9099      | 903.07245    | 14.98448     | 50.0161 |

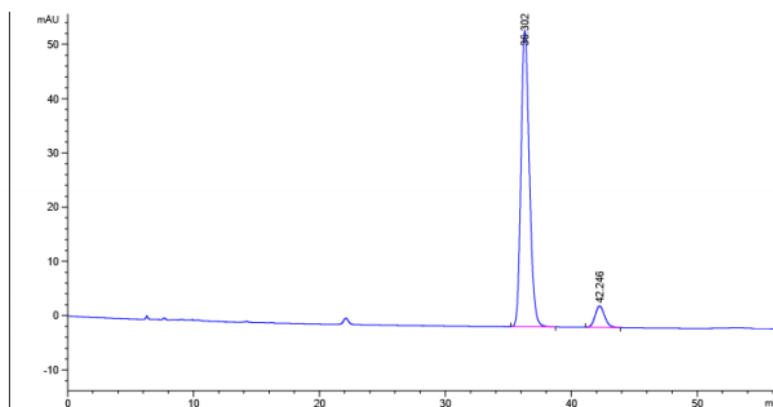

-----  
Area Percent Report  
-----

Sorted By : Signal  
Multiplier : 1.0000  
Dilution : 1.0000  
Use Multiplier & Dilution Factor with ISTDs

Signal 1: Vwd1 A, Wavelength=250 nm

| Peak # | RetTime [min] | Type | Width [min] | Area [mAU*s] | Height [mAU] | Area %  |
|--------|---------------|------|-------------|--------------|--------------|---------|
| 1      | 36.302        | BB   | 0.7149      | 2526.63403   | 54.57219     | 92.4429 |
| 2      | 42.246        | BB   | 0.7444      | 206.55081    | 3.94764      | 7.5571  |

**(R)-N-(2-(Benzo[d]thiazol-2-yl)-2-fluoroethyl)aniline 7s**

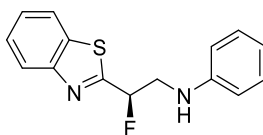

Prepared according to General Procedure B using 2-(1-fluorovinyl)benzo[d]thiazole (17.9 mg, 0.10 mmol, 1.0 equiv), aniline (27  $\mu$ L, 0.30 mmol, 3.0 equiv), (*S*)-TRIP catalyst (15.1 mg, 0.02 mmol, 20 mol%), and CPME (200  $\mu$ L, 0.5 M) at  $-10$   $^{\circ}$ C for 3 d. The reaction mixture was subjected to the purification outlined in General Procedure B (silica gel, EtOAc:petroleum ether, 5:95 to 10:90) to afford the desired product as a pale yellow solid (20.3 mg, 75%).

$\nu_{\text{max}}$  (film): 2357, 1603, 1508, 1317, 1260, 1061, 872, 754, 692  $\text{cm}^{-1}$ .

$^1\text{H NMR}$  (400 MHz,  $\text{CDCl}_3$ ):  $\delta$  8.07 (d,  $J = 8.2$  Hz, 1H), 7.94 (d,  $J = 7.9$  Hz, 1H), 7.53 (ddd,  $J = 8.3, 7.2, 1.3$  Hz, 1H), 7.44 (ddd,  $J = 8.3, 7.2, 1.2$  Hz, 1H), 7.22 (dd,  $J = 8.6, 7.3$  Hz, 2H), 6.83 – 6.70 (m, 3H), 6.02 (ddd,  $^2J_{\text{HF}} = 48.0$  Hz,  $J = 7.2, 3.7$  Hz, 1H), 4.02 (ddd,  $^3J_{\text{HF}} = 26.1$  Hz,  $^2J_{\text{HH}} = 14.5$  Hz,  $J = 3.7$  Hz, 1H), 3.80 (ddd,  $^3J_{\text{HF}} = 19.7$  Hz,  $^2J_{\text{HH}} = 14.5$  Hz,  $J = 7.2$  Hz, 1H).

$^{13}\text{C NMR}$  (101 MHz,  $\text{CDCl}_3$ ):  $\delta$  168.0 (d,  $^2J = 28.0$  Hz), 153.1, 147.0, 134.9, 129.6, 126.6, 125.7, 123.6, 122.0, 118.7, 113.6, 90.7 (d,  $^1J = 173.9$  Hz), 48.4 (d,  $^2J = 22.0$  Hz).

$^{19}\text{F NMR}$  (377 MHz,  $\text{CDCl}_3$ ):  $\delta$   $-181.92$ .

**HRMS (ESI)**: exact mass calculated for  $[\text{M}+\text{H}]^+$  ( $\text{C}_{15}\text{H}_{14}\text{FN}_2\text{S}$ ) requires  $m/z$  273.0856, found  $m/z$  273.0853.

The enantiomeric purity of the product was determined by HPLC analysis: 96:4 e.r. (Chiralcel OJ-H, hexane/*i*-PrOH = 50/50, flow rate 0.5 mL/min,  $\lambda = 250$  nm),  $t_r$  (major) = 39.7 min,  $t_r$  (minor) 47.3 = min;

$$[\alpha]_D^{20} = -18.6 (c 0.43, \text{CHCl}_3).$$

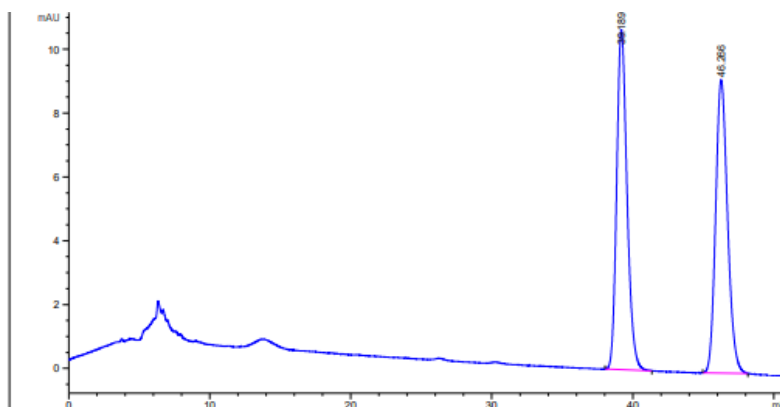

```

=====
                          Area Percent Report
=====
Sorted By      :      Signal
Multiplier    :      1.0000
Dilution      :      1.0000
Use Multiplier & Dilution Factor with ISTDs
  
```

Signal 1: VWD1 A, Wavelength=250 nm

| Peak # | RetTime [min] | Type | Width [min] | Area [mAU*s] | Height [mAU] | Area %  |
|--------|---------------|------|-------------|--------------|--------------|---------|
| 1      | 39.189        | BB   | 0.7733      | 542.54297    | 10.65282     | 50.1830 |
| 2      | 46.266        | BB   | 0.8892      | 538.58551    | 9.18738      | 49.8170 |

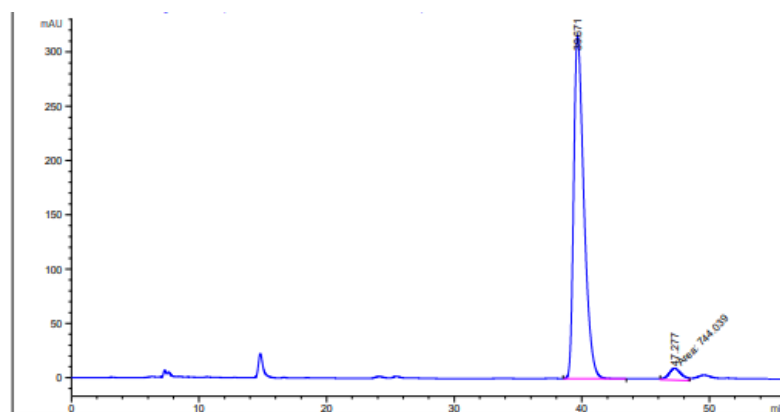

```

=====
                          Area Percent Report
=====
Sorted By      :      Signal
Multiplier    :      1.0000
Dilution      :      1.0000
Use Multiplier & Dilution Factor with ISTDs
  
```

Signal 1: VWD1 A, Wavelength=250 nm

| Peak # | RetTime [min] | Type | Width [min] | Area [mAU*s] | Height [mAU] | Area %  |
|--------|---------------|------|-------------|--------------|--------------|---------|
| 1      | 39.671        | BB   | 0.8407      | 1.75361e4    | 316.16418    | 95.9298 |
| 2      | 47.277        | MM   | 1.1413      | 744.03857    | 10.86501     | 4.0702  |

Methyl (*R*)-6-(1-fluoro-2-(phenylamino)ethyl)nicotinate **7t**

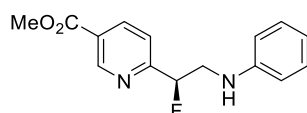

Prepared according to General Procedure B using methyl 6-(1-fluorovinyl)nicotinate (18.1 mg, 0.10 mmol, 1.0 equiv), aniline (27  $\mu$ L, 0.30 mmol, 3.0 equiv), (*S*)-TRIP catalyst (15.1 mg, 0.02 mmol, 20 mol%), and CPME (200  $\mu$ L, 0.5 M) at rt for 3 d. The reaction mixture was subjected to the purification outlined in General Procedure B (silica gel, EtOAc:petroleum ether, 5:95 to 10:90) to afford the desired product as a pale brown oil (6.8 mg, 25%).

$\nu_{\max}$  (film): 1728, 1601, 1506, 1437, 1294, 1119, 750, 694  $\text{cm}^{-1}$ .

$^1\text{H NMR}$  (400 MHz,  $\text{CDCl}_3$ ):  $\delta$  9.20 – 9.19 (m, 1H), 8.35 (dd,  $J = 8.2, 2.1$  Hz, 1H), 7.60 (d,  $J = 8.2$  Hz, 1H), 7.25 – 7.13 (m, 2H), 6.80 – 6.65 (m, 3H), 5.78 (ddd,  $^2J_{\text{HF}} = 48.4$  Hz,  $J = 7.2, 3.3$  Hz, 1H), 4.03 – 3.82 (m, 4H), 3.61 (ddd,  $^3J_{\text{HF}} = 21.3$  Hz,  $^2J_{\text{HH}} = 14.3$  Hz,  $J = 7.2$  Hz, 1H).

$^{13}\text{C NMR}$  (101 MHz,  $\text{CDCl}_3$ ):  $\delta$  165.6, 162.0 (d,  $^2J = 24.7$  Hz), 150.4 (d,  $^4J = 2.7$  Hz), 147.4, 138.2, 129.5, 125.6, 119.8 (d,  $^3J = 7.4$  Hz), 118.3, 113.4, 92.7 (d,  $^1J = 175.3$  Hz), 52.6, 48.4 (d,  $^2J = 21.6$  Hz).

$^{19}\text{F NMR}$  (376 MHz,  $\text{CDCl}_3$ ):  $\delta$  -193.31.

HRMS (ESI): exact mass calculated for  $[\text{M}+\text{H}]^+$  ( $\text{C}_{15}\text{H}_{16}\text{FN}_2\text{O}_2$ ) requires  $m/z$  275.1190, found  $m/z$  275.1190.

The enantiomeric purity of the product was determined by HPLC analysis: 88:12 e.r. (Chiralpak IA, hexane/*i*-PrOH = 50/50, flow rate 0.5 mL/min,  $\lambda = 250$  nm),  $t_r$  (major) = 13.0 min,  $t_r$  (minor) = 14.8 min;

$[\alpha]_{\text{D}}^{20} = +2.95$  ( $c$  0.88,  $\text{CHCl}_3$ ).

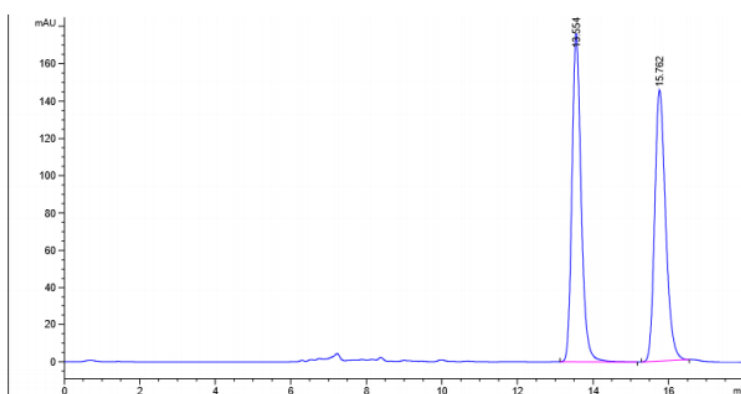

Area Percent Report

Sorted By : Signal  
Multiplier : 1.0000  
Dilution : 1.0000  
Use Multiplier & Dilution Factor with ISTDs

Signal 1: VMD1 A, Wavelength=250 nm

| Peak # | RetTime [min] | Type | Width [min] | Area [mAU*s] | Height [mAU] | Area %  |
|--------|---------------|------|-------------|--------------|--------------|---------|
| 1      | 13.554        | BB   | 0.2588      | 2987.50024   | 176.31598    | 50.5592 |
| 2      | 15.762        | BB   | 0.3083      | 2921.41113   | 145.62823    | 49.4408 |



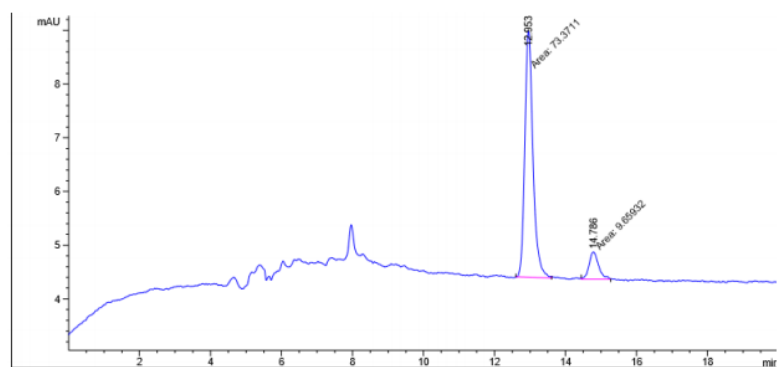

Area Percent Report

---

Sorted By : Signal  
Multiplier: : 1.0000  
Dilution: : 1.0000  
Use Multiplier & Dilution Factor with ISTDs

Signal 1: DAD1 A, Sig=254,4 Ref=360,100

| Peak # | RetTime [min] | Type | Width [min] | Area [mAU*s] | Height [mAU] | Area %  |
|--------|---------------|------|-------------|--------------|--------------|---------|
| 1      | 12.953        | MM   | 0.2664      | 73.37106     | 4.59014      | 88.3665 |
| 2      | 14.786        | MM   | 0.3154      | 9.65932      | 5.10492e-1   | 11.6335 |

*(R)*-*N*-(2-Fluoro-2-(isoquinolin-1-yl)ethyl)aniline **7u**

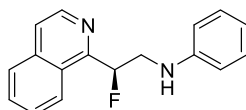

Prepared according to General Procedure B using 1-(1-fluorovinyl)isoquinoline (17.3 mg, 0.10 mmol, 1.0 equiv), aniline (27  $\mu$ L, 0.30 mmol, 3.0 equiv), (*S*)-TRIP catalyst (15.1 mg, 0.02 mmol, 20 mol%), and CPME (200  $\mu$ L, 0.5 M) at  $-10$   $^{\circ}$ C for 3 d. The reaction mixture was subjected to the purification outlined in General Procedure B (silica gel, EtOAc:petroleum ether, 5:95 to 10:90) to afford the desired product as a pale brown oil (16.3 mg, 61%).

$\nu_{\text{max}}$  (film): 1603, 1504, 829, 748, 692  $\text{cm}^{-1}$ .

$^1\text{H}$  NMR (400 MHz,  $\text{CDCl}_3$ ):  $\delta$  8.56 (d,  $J$  = 5.7 Hz, 1H), 8.31 (d,  $J$  = 8.0 Hz, 1H), 7.88 (d,  $J$  = 8.2 Hz, 1H), 7.77 – 7.60 (m, 3H), 7.25 – 7.16 (m, 2H), 6.79 – 6.69 (m, 3H), 6.37 (ddd,  $^2J_{\text{HF}}$  = 48.4,  $J$  = 6.9, 5.2 Hz, 1H), 4.33 (s, 1H), 4.15 – 3.93 (m, 2H).

$^{13}\text{C}$  NMR (101 MHz,  $\text{CDCl}_3$ ):  $\delta$  155.2 (d,  $^2J$  = 18.6 Hz), 147.6, 141.7, 136.8, 130.4, 129.5, 128.0, 127.7, 126.9, 124.9 (d,  $^3J$  = 4.8 Hz), 122.0, 118.1, 113.4, 90.8 (d,  $^1J$  = 173.5 Hz), 46.9 (d,  $^2J$  = 24.1 Hz).

$^{19}\text{F}$  NMR (376 MHz,  $\text{CDCl}_3$ ):  $\delta$  -180.92.

HRMS (ESI): exact mass calculated for  $[\text{M}+\text{H}]^+$  ( $\text{C}_{17}\text{H}_{16}\text{FN}_2$ ) requires  $m/z$  267.1292, found  $m/z$  267.1290.

The enantiomeric purity of the product was determined by HPLC analysis: 62:38 e.r. (Chiralpak IA, hexane/*i*-PrOH = 50/50, flow rate 0.5 mL/min,  $\lambda$  = 250 nm),  $t_r$  (major) = 14.8 min,  $t_r$  (minor) = 23.9 min;

$[\alpha]_{\text{D}}^{20}$  = +2.00 ( $c$  0.10,  $\text{CHCl}_3$ ).

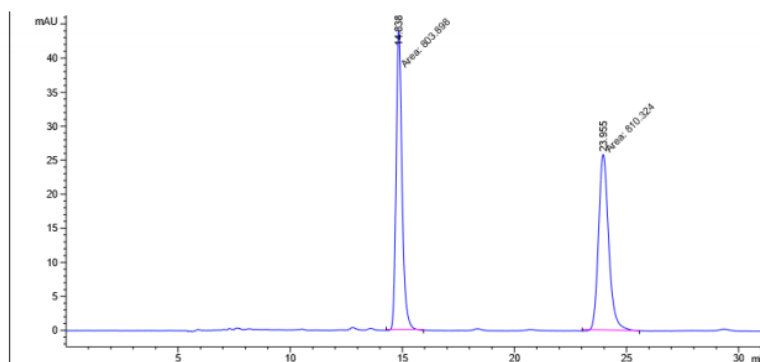

-----  
 Area Percent Report  
 -----

Sorted By : Signal  
 Multiplier: : 1.0000  
 Dilution: : 1.0000  
 Use Multiplier & Dilution Factor with ISTDs

Signal 1: DAD1 A, Sig=254,4 Ref=360,100

| Peak # | RetTime [min] | Type | Width [min] | Area [mAU*s] | Height [mAU] | Area %  |
|--------|---------------|------|-------------|--------------|--------------|---------|
| 1      | 14.838        | MM   | 0.3049      | 803.89758    | 43.94274     | 49.8009 |
| 2      | 23.955        | MM   | 0.5242      | 810.32446    | 25.76460     | 50.1991 |

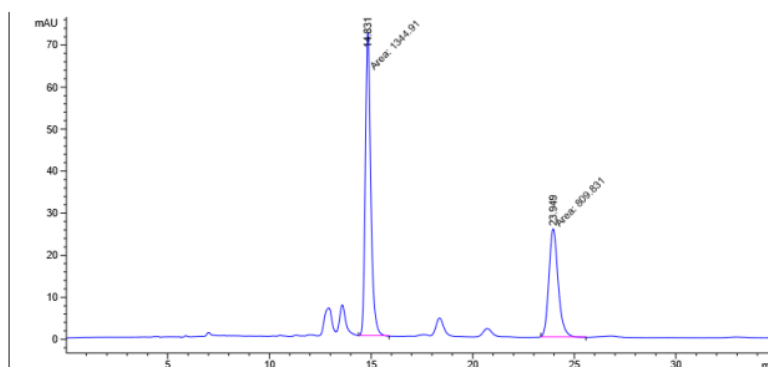

-----  
 Area Percent Report  
 -----

Sorted By : Signal  
 Multiplier: : 1.0000  
 Dilution: : 1.0000  
 Use Multiplier & Dilution Factor with ISTDs

Signal 1: DAD1 A, Sig=254,4 Ref=360,100

| Peak # | RetTime [min] | Type | Width [min] | Area [mAU*s] | Height [mAU] | Area %  |
|--------|---------------|------|-------------|--------------|--------------|---------|
| 1      | 14.831        | MM   | 0.3106      | 1344.91199   | 72.15852     | 62.4163 |
| 2      | 23.949        | MM   | 0.5258      | 809.83136    | 25.66826     | 37.5837 |

*(S)*-*N*-(2-Fluoro-2-(quinolin-4-yl)ethyl)aniline **7v**

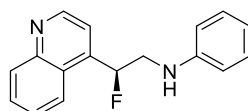

Prepared according to General Procedure B using 4-(1-fluorovinyl)quinoline (17.3 mg, 0.10 mmol, 1.0 equiv), aniline (27  $\mu$ L, 0.30 mmol, 3.0 equiv), (*S*)-TRIP catalyst (15.1 mg, 0.02 mmol, 20 mol%), and CPME (200  $\mu$ L, 0.5 M) at rt for 3 d. The reaction mixture was subjected to the purification outlined in General Procedure B (silica gel, EtOAc:petroleum ether, 5:95 to 10:90) to afford the desired product as a pale yellow solid (17.9 mg, 68%).

$\nu_{\max}$  (film): 2361, 1601, 1509, 1323, 1250, 1069, 752  $\text{cm}^{-1}$ .

$^1\text{H}$  NMR (400 MHz,  $\text{CDCl}_3$ ):  $\delta$  8.96 (d,  $J = 4.4$  Hz, 1H), 8.20 (dt,  $J = 8.4, 1.1$  Hz, 1H), 7.92 (dt,  $J = 8.5, 0.9$  Hz, 1H), 7.77 (ddd,  $J = 8.4, 6.9, 1.4$  Hz, 1H), 7.62 (ddd,  $J = 8.3, 6.9, 1.3$  Hz, 1H), 7.55 (dd,  $J = 4.5, 0.8$  Hz, 1H), 7.31 – 7.12 (m, 2H), 6.79 (tt,  $J = 7.3, 1.1$  Hz, 1H), 6.76 – 6.65 (m, 2H), 6.50 – 6.25 (m, 1H), 4.17 (s, 1H), 3.81 (ddd,  $^3J_{\text{HF}} = 29.9$  Hz,  $^2J_{\text{HH}} = 14.4$  Hz,  $J = 3.0$  Hz, 1H), 3.61 (ddd,  $^3J_{\text{HF}} = 18.3$  Hz,  $^2J_{\text{HH}} = 14.4$  Hz,  $J = 8.1$  Hz, 1H).

$^{13}\text{C}$  NMR (101 MHz,  $\text{CDCl}_3$ ):  $\delta$  150.2, 148.2, 147.1, 143.0 (d,  $^2J = 19.2$  Hz), 130.7, 129.60, 129.53, 127.29, 122.41, 118.64, 117.68, 117.57, 113.45, 89.90 (d,  $^1J = 175.4$  Hz), 49.54 (d,  $^2J = 23.6$  Hz).

$^{19}\text{F}$  NMR (377 MHz,  $\text{CDCl}_3$ ):  $\delta$  -190.24.

HRMS(ESI): exact mass calculated for  $[\text{M}+\text{H}]^+$  ( $\text{C}_{17}\text{H}_{16}\text{FN}_2$ ) requires  $m/z$  267.1292, found  $m/z$  267.1285.

The enantiomeric purity of the product was determined by HPLC analysis: 50:50 e.r. (Chiralpak IA, hexane/*i*-PrOH = 50/50, flow rate 0.5 mL/min,  $\lambda = 250$  nm),  $t_r$  (major) = 5.7 min,  $t_r$  (minor) = 6.9 min;

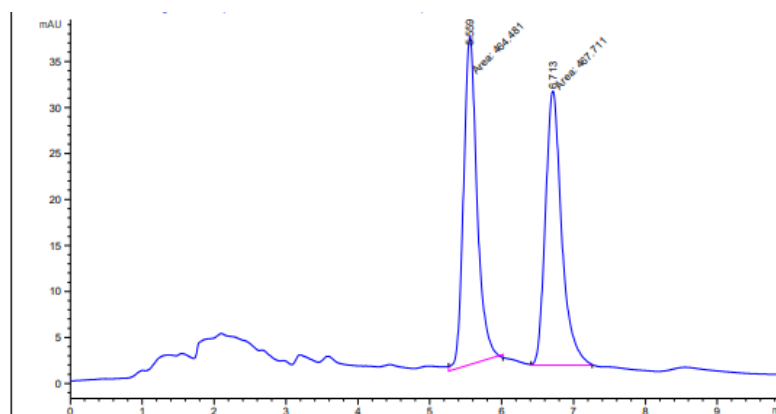

Area Percent Report

Sorted By : Signal  
Multiplier : 1.0000  
Dilution : 1.0000  
Use Multiplier & Dilution Factor with ISTDs

Signal 1: VWD1 A, Wavelength=250 nm

| Peak # | RetTime [min] | Type | Width [min] | Area [mAU*s] | Height [mAU] | Area %  |
|--------|---------------|------|-------------|--------------|--------------|---------|
| 1      | 5.559         | MM   | 0.2170      | 464.48099    | 35.67741     | 49.8268 |
| 2      | 6.713         | MM   | 0.2617      | 467.71078    | 29.78292     | 50.1732 |

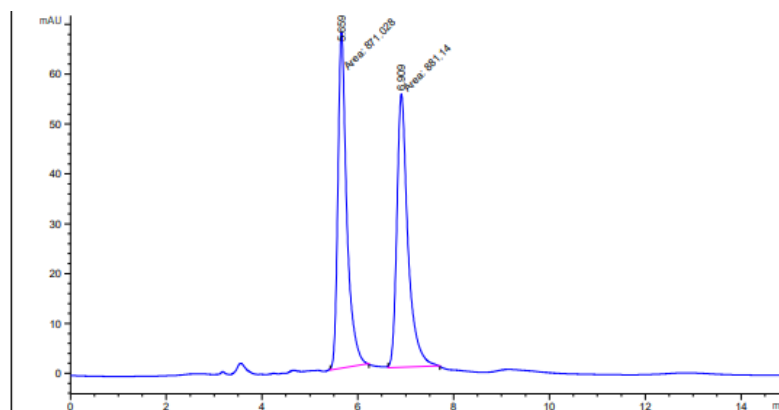

Area Percent Report

Sorted By : Signal  
Multiplier : 1.0000  
Dilution : 1.0000  
Use Multiplier & Dilution Factor with ISTDs

Signal 1: VWD1 A, Wavelength=250 nm

| Peak # | RetTime [min] | Type | Width [min] | Area [mAU*s] | Height [mAU] | Area %  |
|--------|---------------|------|-------------|--------------|--------------|---------|
| 1      | 5.659         | MM   | 0.2156      | 871.02771    | 67.33373     | 49.7114 |
| 2      | 6.909         | MM   | 0.2678      | 881.13983    | 54.83912     | 50.2886 |

(*R*)-*N*-(2-(8-Chloroquinolin-2-yl)-2-fluoroethyl)aniline **7w**

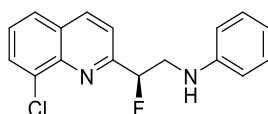

Prepared according to General Procedure B using 2-(1-fluorovinyl)-8-chloroquinoline (10.4 mg, 0.05 mmol, 1.0 equiv), aniline (14  $\mu$ L, 0.15 mmol, 3.0 equiv), (*S*)-TRIP catalyst (7.5 mg, 0.01 mmol, 20 mol%), and CPME (100  $\mu$ L, 0.5 M) at 40  $^{\circ}$ C. The reaction mixture was subjected to the purification outlined in General Procedure B (silica gel, EtOAc:petroleum ether, 5:95 to 10:90) to afford the desired product as a pale brown oil (9.5 mg, 50%).

$\nu_{\max}$  (film): 1601, 1501, 841, 752, 692, 669  $\text{cm}^{-1}$ .

$^1\text{H NMR}$  (400 MHz,  $\text{CDCl}_3$ ):  $\delta$  8.25 (d,  $J = 8.5$  Hz, 1H), 7.87 (dd,  $J = 7.5, 1.3$  Hz, 1H), 7.75 (ddd,  $J = 16.5, 8.4, 1.6$  Hz, 2H), 7.49 (dd,  $J = 8.2, 7.5$  Hz, 1H), 7.24 – 7.15 (m, 2H), 6.81 – 6.69 (m, 3H), 5.95 (ddd,  $^2J_{\text{HF}} = 48.1$  Hz,  $J = 6.2, 5.0$  Hz, 1H), 4.71 (s, 1H), 4.03 – 3.77 (m, 2H).

$^{13}\text{C NMR}$  (101 MHz,  $\text{CDCl}_3$ ):  $\delta$  159.4 (d,  $^2J = 25.7$  Hz), 147.8, 143.6, 137.7, 133.7, 130.1, 129.5, 129.0, 126.9, 126.9, 118.7 (d,  $^3J = 6.9$  Hz), 118.1, 113.5, 92.7 (d,  $^1J = 175.2$  Hz), 48.4 (d,  $^2J = 23.1$  Hz).

$^{19}\text{F NMR}$  (376 MHz,  $\text{CDCl}_3$ ):  $\delta$  -191.99.

HRMS (ESI): exact mass calculated for  $[\text{M}+\text{H}]^+$  ( $\text{C}_{17}\text{H}_{15}\text{N}_2\text{ClF}$ ) requires  $m/z$  301.0902, found  $m/z$  301.0898.

The enantiomeric purity of the product was determined by HPLC analysis: 51:49 e.r. (Chiralpak IA, hexane/*i*-PrOH = 50/50, flow rate 0.5 mL/min,  $\lambda = 250$  nm),  $t_r$  (major) = 10.5 min,  $t_r$  (minor) = 10.1 min;

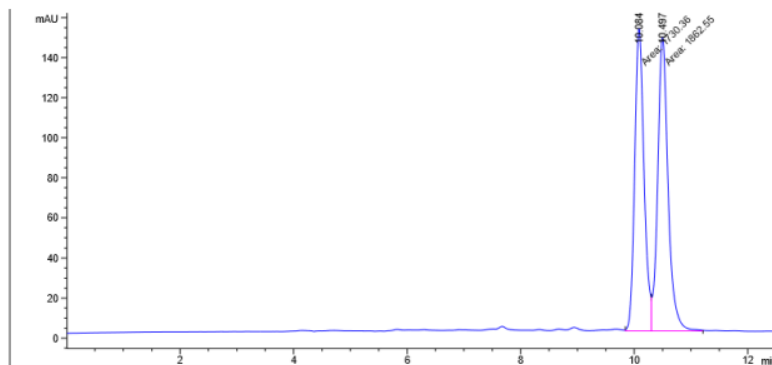

Area Percent Report

Sorted By : Signal  
 Multiplier: : 1.0000  
 Dilution: : 1.0000  
 Use Multiplier & Dilution Factor with ISTDs

Signal 1: DAD1 A, Sig=254,4 Ref=360,100

| Peak # | RetTime [min] | Type | Width [min] | Area [mAU*s] | Height [mAU] | Area %  |
|--------|---------------|------|-------------|--------------|--------------|---------|
| 1      | 10.084        | MF   | 0.1907      | 1730.35657   | 151.19955    | 48.1604 |
| 2      | 10.497        | FM   | 0.2118      | 1862.54712   | 146.57484    | 51.8396 |

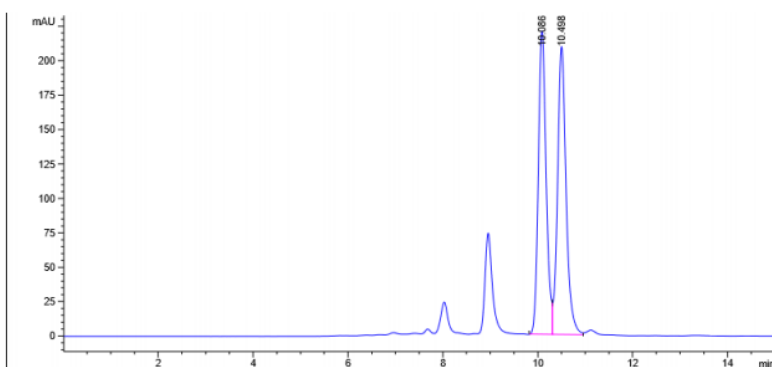

Area Percent Report

Sorted By : Signal  
 Multiplier: : 1.0000  
 Dilution: : 1.0000  
 Use Multiplier & Dilution Factor with ISTDs

Signal 1: DAD1 A, Sig=254,4 Ref=360,100

| Peak # | RetTime [min] | Type | Width [min] | Area [mAU*s] | Height [mAU] | Area %  |
|--------|---------------|------|-------------|--------------|--------------|---------|
| 1      | 10.086        | BV   | 0.1753      | 2519.43018   | 220.56381    | 49.0498 |
| 2      | 10.498        | VV   | 0.1898      | 2617.04395   | 209.41792    | 50.9502 |

2-(3,3,3-Trifluoroprop-1-en-2-yl)quinoline **10**

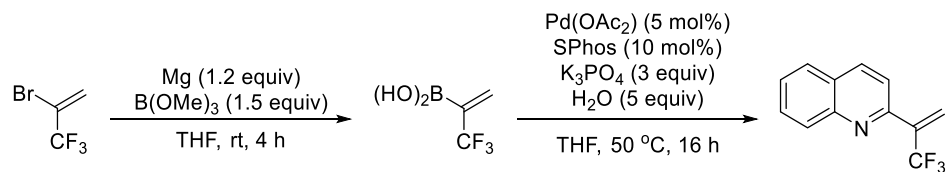

This compound was prepared according to an adapted literature procedure.<sup>8</sup>

An oven-dried round 100 mL round bottom flask was charged with Mg turnings (262 mg, 10.8 mmol, 1.2 equiv), capped and purged with N<sub>2</sub>. Then THF (18 mL, 0.5 M) and freshly distilled trimethylborate (1.50 mL, 13.5 mmol, 1.5 equiv) were added sequentially and the mixture was allowed to stir at rt for 5 min. 2-Bromo-1,1,1-trifluoropropene (0.96 mL, 9.00 mmol, 1.0 equiv) was then added dropwise over 5 min, then the reaction was stirred for 4 h at rt. The reaction was quenched using 6 M HCl (50 mL) and the solution was left to stir for 5 min. The organic layer was then separated and the aqueous layer was extracted with Et<sub>2</sub>O (3 × 20 mL). The combined organic extracts were washed with brine (50 mL), dried over NaSO<sub>4</sub>, filtered, and concentrated *in vacuo*. Formation of the boronic acid was confirmed *via* <sup>11</sup>B NMR, then the crude was used directly in the next step.

*NB.* Calculations based upon quantitative conversion to boronic acid in the previous step. An oven-dried 2-necked 100 mL round bottomed flask equipped with a reflux condenser was charged with Pd(OAc)<sub>2</sub> (50.5 mg, 0.225 mmol, 5 mol%), SPhos (185 mg, 0.45 mmol, 10 mol%), 2-bromoquinoline (936 mg, 4.50 mmol, 1.0 equiv), the crude boronic acid (9.00 mmol, 2.0 equiv), and K<sub>3</sub>PO<sub>4</sub> (2.87 g, 13.5 mmol, 3.00 equiv). The vessel was capped and purged with N<sub>2</sub>. THF (22.5 mL, 0.2 M) and water (405 μL, 22.5 mmol, 5.0 equiv) were then added to the mixture sequentially. The reaction was then heated to 50 °C for 16 h. The reaction mixture was then cooled to rt, filtered through Celite, eluting with EtOAc and concentrated *in vacuo*. Purification of the crude *via* flash chromatography (silica gel, EtOAc:petroleum ether, 10:90) gave the desired product as a pale yellow oil (102 mg, 9%).

*NB.* Due to the reactive nature of this compound, an analytically pure sample was not obtained, data reported as observed. The compound was used directly in the next step.

**ν<sub>max</sub> (film):** 2361, 2342, 1504, 1323, 1196, 1126, 1096, 1069, 907, 833, 729, 648 cm<sup>-1</sup>.

**<sup>1</sup>H NMR (400 MHz, CDCl<sub>3</sub>):** δ 8.20 (d, *J* = 8.7 Hz, 1H), 8.11 (d, *J* = 8.4 Hz, 1H), 7.83 (d, *J* = 8.1 Hz, 1H), 7.74 (ddd, *J* = 8.4, 6.9, 1.4 Hz, 1H), 7.65 – 7.60 (m, 1H), 7.56 (ddd, *J* = 8.1, 6.9, 1.1 Hz, 1H), 6.68 (q, <sup>4</sup>*J*<sub>HF</sub> = 1.8 Hz, 1H), 6.25 (q, <sup>4</sup>*J*<sub>HF</sub> = 1.4 Hz, 1H).

**<sup>13</sup>C NMR (126 MHz, CDCl<sub>3</sub>):** δ 151.0, 148.0, 138.5 (q, <sup>2</sup>*J* = 27.7 Hz), 137.0, 130.2, 130.0, 127.8, 127.6, 127.3, 124.5 (q, <sup>1</sup>*J* = 273.4 Hz), 123.3 (q, <sup>3</sup>*J* = 6.3 Hz), 119.2.

**<sup>19</sup>F NMR (470 MHz, CDCl<sub>3</sub>):** δ -63.61.

**HRMS (ESI):** exact mass calculated for [M+H]<sup>+</sup> (C<sub>12</sub>H<sub>9</sub>F<sub>3</sub>N) requires *m/z* 224.0682, found *m/z* 224.0677.

(*R*)-*N*-(3,3,3-Trifluoro-2-(quinolin-2-yl)propyl)aniline **11**

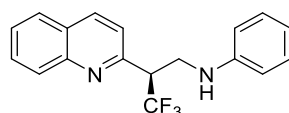

Prepared according to General Procedure B using 2-(3,3,3-trifluoroprop-1-en-2-yl)quinoline (11.2 mg, 0.05 mmol, 1.0 equiv), aniline (14 μL, 0.15 mmol, 3.0 equiv), (*S*)-TRIP catalyst (37.6 mg, 0.05 mmol, 1.0 equiv), and CPME (200 μL, 0.25 M) at -50 °C for 3 d. The reaction mixture was subjected to the purification outlined in General Procedure B (silica gel, EtOAc:petroleum ether, 5:95 to 10:90) to afford the desired product as a pale yellow solid (11.5 mg, 73%).

**ν<sub>max</sub> (film):** 2361, 2342, 1601, 1504, 1315, 1254, 1165, 1111, 826, 752, 694 cm<sup>-1</sup>.

**<sup>1</sup>H NMR (500 MHz, CDCl<sub>3</sub>):** δ 8.18 – 8.14 (m, 2H), 7.85 (dd, *J* = 8.2, 1.4 Hz, 1H), 7.77 (ddd, *J* = 8.4, 6.9, 1.5 Hz, 1H), 7.59 (ddd, *J* = 8.1, 6.9, 1.2 Hz, 1H), 7.40 (d, *J* = 8.4 Hz, 1H), 7.20 – 7.14 (m, 2H), 6.73 (tt, *J* = 7.3, 1.1 Hz, 1H), 6.59 (dt, *J* = 7.7, 1.0 Hz, 2H), 4.20 – 3.82 (m, 4H).

**<sup>13</sup>C NMR (126 MHz, CDCl<sub>3</sub>):** δ 153.4, 148.0, 147.0, 137.1, 130.1, 129.7, 129.5, 127.7, 127.7, 127.2, 126.1 (q, <sup>1</sup>*J* = 280.5 Hz), 122.1, 118.2, 113.2, 51.1 (q, <sup>2</sup>*J* = 25.0 Hz), 41.9.

**<sup>19</sup>F NMR (470 MHz, CDCl<sub>3</sub>):** δ -67.02.

**HRMS (ESI):** exact mass calculated for [M+H]<sup>+</sup> (C<sub>18</sub>H<sub>16</sub>F<sub>3</sub>N<sub>2</sub>) requires *m/z* 317.1260, found *m/z* 317.1251.

The enantiomeric purity of the product was determined by HPLC analysis: 90:10 e.r. (Chiralpak IA, hexane/*i*-PrOH = 50/50, flow rate 1.0 mL/min, λ = 250 nm), *t<sub>r</sub>* (major) = 9.1 min, *t<sub>r</sub>* (minor) = 11.6 min;

[α]<sub>D</sub><sup>20</sup> = -80.4 (*c* 1.00, CHCl<sub>3</sub>).

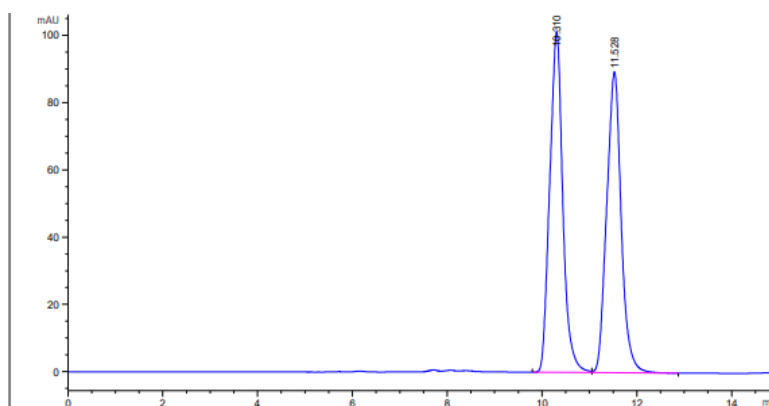

-----  
Area Percent Report  
-----

Sorted By : Signal  
Multiplier : 1.0000  
Dilution : 1.0000  
Use Multiplier & Dilution Factor with ISTDs

Signal 1: VWD1 A, Wavelength=250 nm

| Peak # | RetTime [min] | Type | Width [min] | Area [mAU*s] | Height [mAU] | Area %  |
|--------|---------------|------|-------------|--------------|--------------|---------|
| 1      | 10.310        | BV   | 0.2817      | 1941.33411   | 101.37083    | 50.5532 |
| 2      | 11.528        | VB   | 0.3160      | 1898.84473   | 89.48219     | 49.4468 |

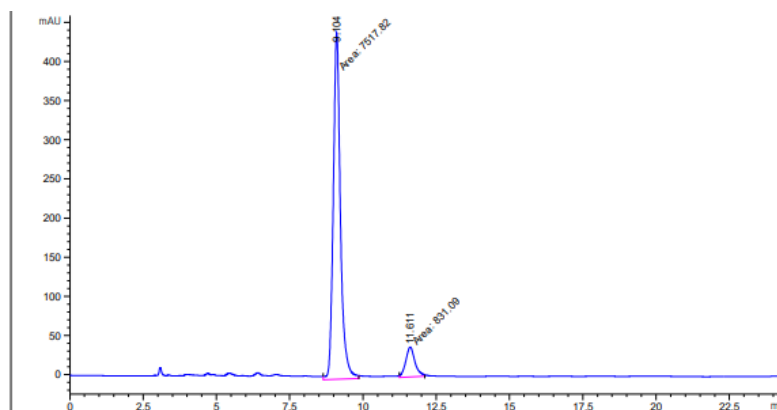

Area Percent Report

Sorted By : Signal  
Multiplier : 1.0000  
Dilution : 1.0000  
Use Multiplier & Dilution Factor with ISTDs

Signal 1: VWD1 A, Wavelength=210 nm

| Peak # | RetTime [min] | Type | Width [min] | Area [mAU*s] | Height [mAU] | Area %  |
|--------|---------------|------|-------------|--------------|--------------|---------|
| 1      | 9.104         | MM   | 0.2829      | 7517.82324   | 442.87985    | 90.0455 |
| 2      | 11.611        | MM   | 0.3643      | 831.08960    | 38.02613     | 9.9545  |

*N*-(2-Fluoro-2-(quinolin-2-yl)ethyl)-*N*-phenylacetamide **16**

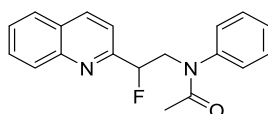

Prepared according to literature procedure.<sup>9</sup>

A 10 mL microwave vial was charged with *N*-(2-fluoro-2-(quinolin-2-yl)ethyl)aniline (151 mg, 0.57 mmol, 1.0 equiv). The vial was capped and purged with N<sub>2</sub>. Dry CH<sub>2</sub>Cl<sub>2</sub> (1 mL) and Ac<sub>2</sub>O (54 μL, 0.57 mmol, 1.0 equiv) were added to the vessel and the reaction mixture was allowed to stir at rt for 16 h. The reaction was then quenched with 2 M HCl (1 mL) and the aqueous phase was extracted with CH<sub>2</sub>Cl<sub>2</sub> (2 × 5 mL). The combined organic phases were dried over Na<sub>2</sub>SO<sub>4</sub>, filtered, and concentrated *in vacuo*. Purification of the crude *via* flash chromatography (silica gel, EtOAc:petroleum ether, 5:95 to 10:90) gave the desired product as a pale yellow oil (51.0 mg, 29%).

**ν<sub>max</sub> (film):** 1659, 1597, 1497, 1427, 1389, 1300, 1281, 1072, 1026, 837, 756, 702 cm<sup>-1</sup>.

**<sup>1</sup>H NMR (500 MHz, CDCl<sub>3</sub>):** δ 8.21 (d, *J* = 8.5 Hz, 1H), 8.03 (d, *J* = 8.5 Hz, 1H), 7.82 (d, *J* = 8.1 Hz, 1H), 7.71 (t, *J* = 7.7 Hz, 1H), 7.63 (d, *J* = 8.2 Hz, 1H), 7.55 (t, *J* = 7.5 Hz, 1H), 7.43 (t, *J* = 7.5 Hz, 2H), 7.35 (dd, *J* = 23.7, 7.4 Hz, 3H), 5.99 – 5.84 (m, 1H), 4.42 – 4.26 (m, 2H), 1.90 (s, 3H).

**<sup>13</sup>C NMR (126 MHz, CDCl<sub>3</sub>):** δ 171.2, 157.4 (d, <sup>2</sup>*J* = 22.2 Hz), 147.5, 143.2, 137.2, 130.0, 129.9, 129.4, 128.6, 128.3, 127.9, 127.8, 127.0, 118.3 (d, <sup>3</sup>*J* = 5.6 Hz), 92.0 (d, <sup>1</sup>*J* = 176.9 Hz), 53.2 (d, <sup>2</sup>*J* = 22.7 Hz), 23.0.

**<sup>19</sup>F NMR (470 MHz, CDCl<sub>3</sub>):** δ -189.42.

**HRMS (ESI):** exact mass calculated for [M+H]<sup>+</sup> (C<sub>19</sub>H<sub>18</sub>FN<sub>2</sub>O) requires *m/z* 309.1398, found *m/z* 309.1388.



## 8. References

1. Armarego, W. L. F.; Chai, C. *Purification of Laboratory Chemicals, 7th ed.*, Elsevier, Oxford, **2013**.
2. T. Hanamoto, T. Kobayashi, *J. Org. Chem* **2003**, *68*, 6354–6359.
3. T. Dorn, C. Janiak, K. Abu-Shandi, *CrystEngComm* **2005**, *7*, 633–641.
4. Gaussian 09, Revision C.01, M. J. Frisch, G. W. Trucks, H. B. Schlegel, G. E. Scuseria, M. A. Robb, J. R. Cheeseman, G. Scalmani, V. Barone, G. A. Petersson, H. Nakatsuji, X. Li, M. Caricato, A. Marenich, J. Bloino, B. G. Janesko, R. Gomperts, B. Mennucci, H. P. Hratchian, J. V. Ortiz, A. F. Izmaylov, J. L. Sonnenberg, D. Williams-Young, F. Ding, F. Lipparini, F. Egidi, J. Goings, B. Peng, A. Petrone, T. Henderson, D. Ranasinghe, V. G. Zakrzewski, J. Gao, N. Rega, G. Zheng, W. Liang, M. Hada, M. Ehara, K. Toyota, R. Fukuda, J. Hasegawa, M. Ishida, T. Nakajima, Y. Honda, O. Kitao, H. Nakai, T. Vreven, K. Throssell, J. A. Montgomery, Jr., J. E. Peralta, F. Ogliaro, M. Bearpark, J. J. Heyd, E. Brothers, K. N. Kudin, V. N. Staroverov, T. Keith, R. Kobayashi, J. Normand, K. Raghavachari, A. Rendell, J. C. Burant, S. S. Iyengar, J. Tomasi, M. Cossi, J. M. Millam, M. Klene, C. Adamo, R. Cammi, J. W. Ochterski, R. L. Martin, K. Morokuma, O. Farkas, J. B. Foresman, and D. J. Fox, Gaussian, Inc., Wallingford CT, 2016.
5. Ignacio Funes-Ardoiz, Robert S. Paton, *GoodVibes: Version 2.0.3*, Zenodo, **2018**.
6. D. Wang, Y. Wang, J. Zhao, L. Li, L. Miao, D. Wang, H. Sun, P. Yu, *Tetrahedron* **2016**, *72*, 5762–5768.
7. S. E. Wengryniuk, A. Weickgenannt, C. Reiher, N. A. Strotman, K. Chen, M. D. Eastgate, P. S. Baran *Org. Lett.* **2013**, *15*, 792–795.
8. B. Jiang, Q.-F. Wang, C.-G. Yang, M. Xu *Tetrahedron Lett.* **2001**, *42*, 4083–4085.
9. A. Romanens, G. Bélanger, *Org. Lett.* **2015**, *17*, 322–325.

## 9. NMR Spectra

### <sup>1</sup>H NMR of 5a

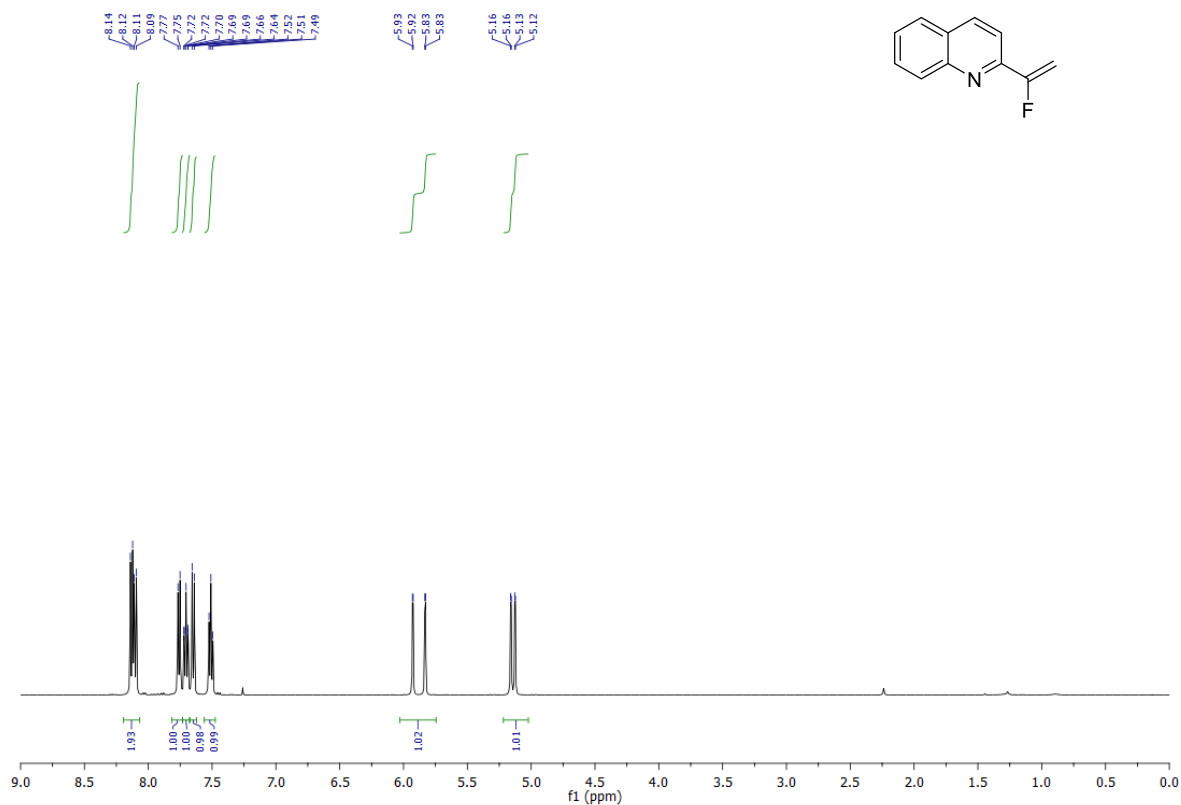

### <sup>13</sup>C NMR of 5a

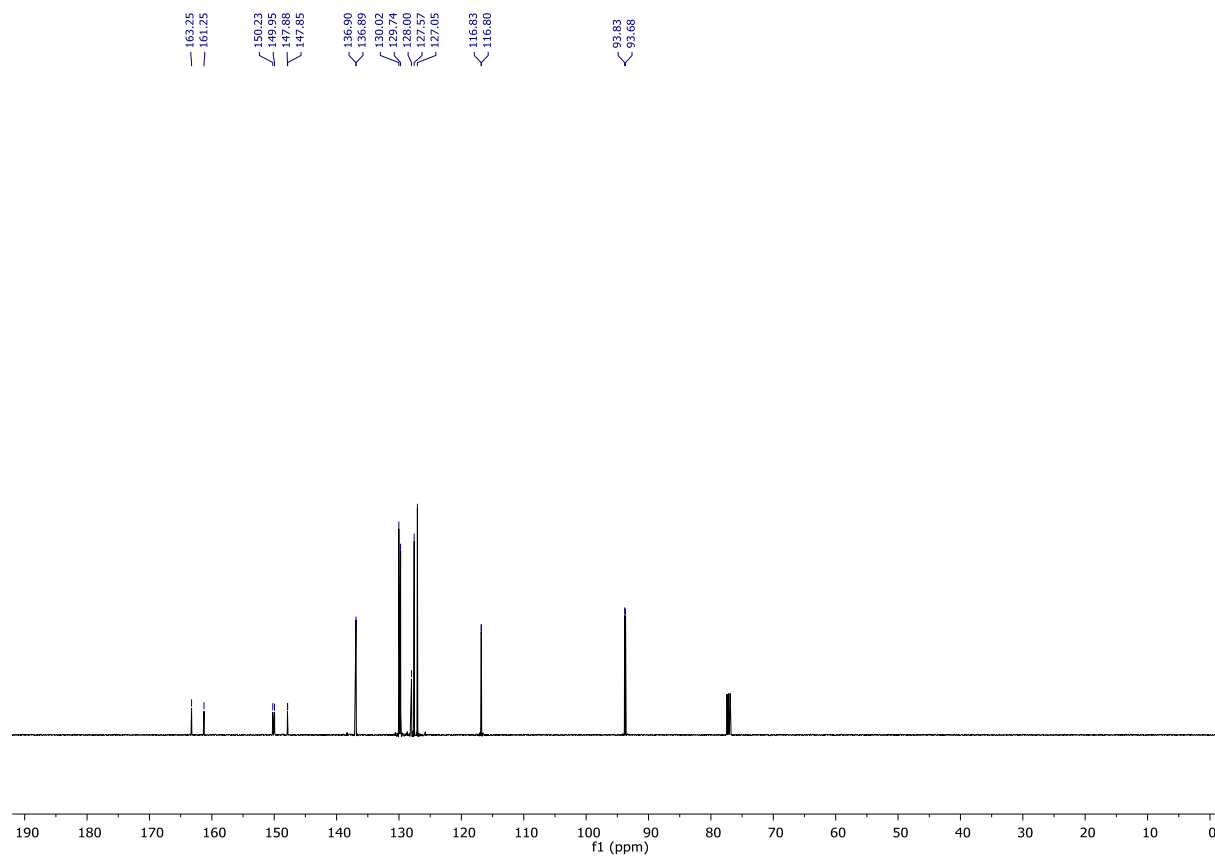

### <sup>19</sup>F NMR of 5a

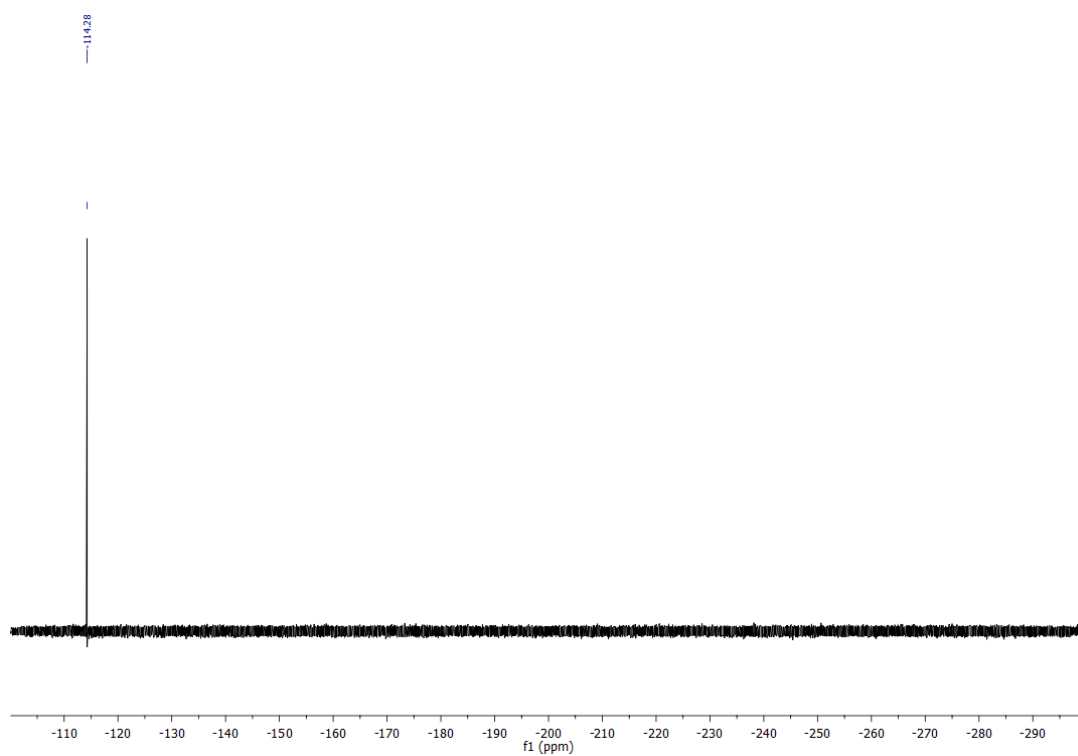

### <sup>1</sup>H NMR of 5b

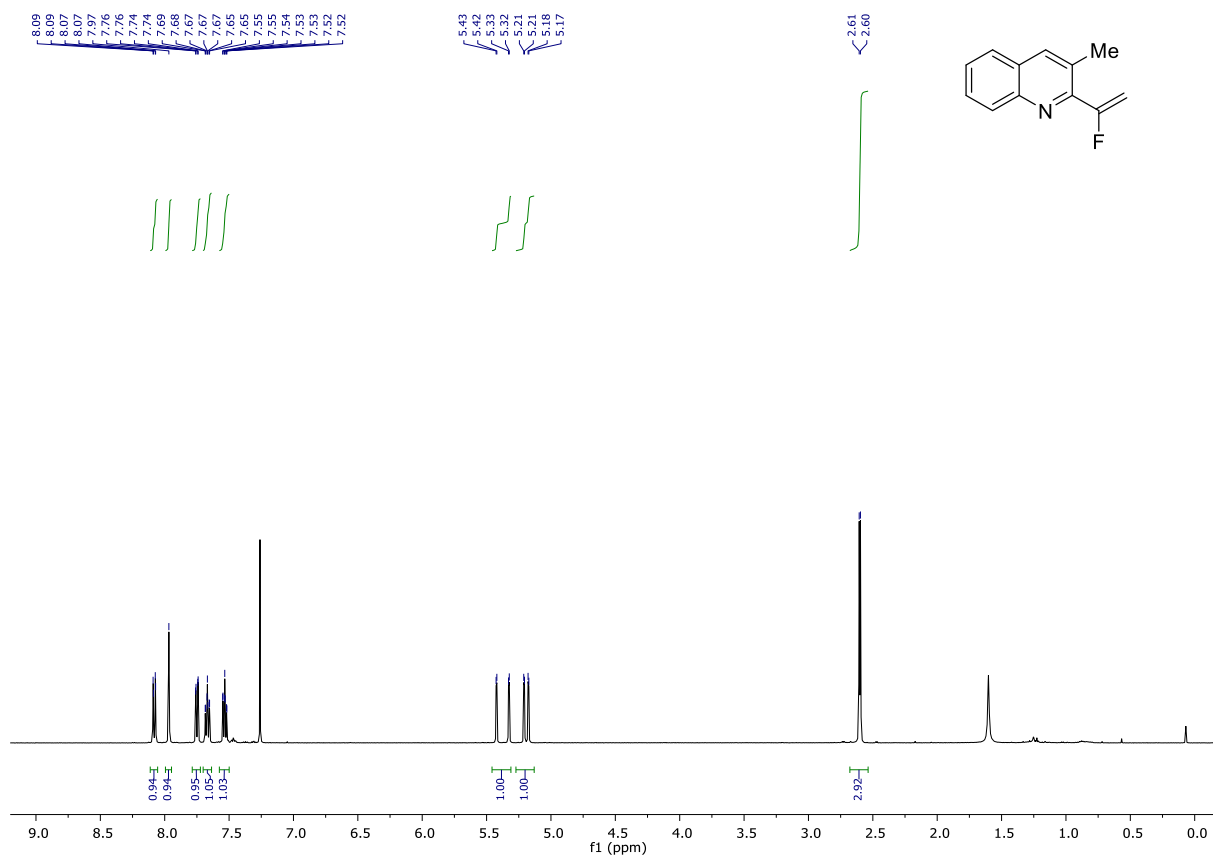

### <sup>13</sup>C NMR of 5b

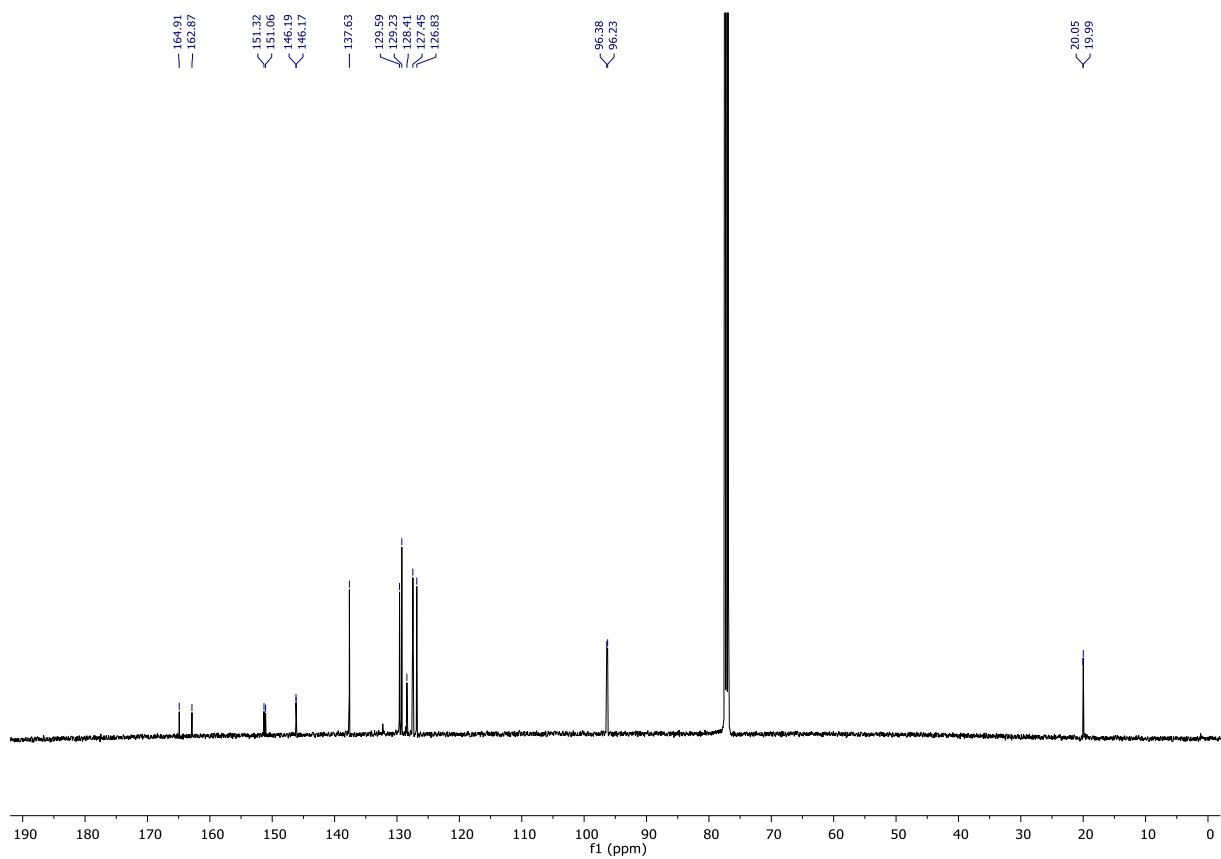

### <sup>19</sup>F NMR of 5b

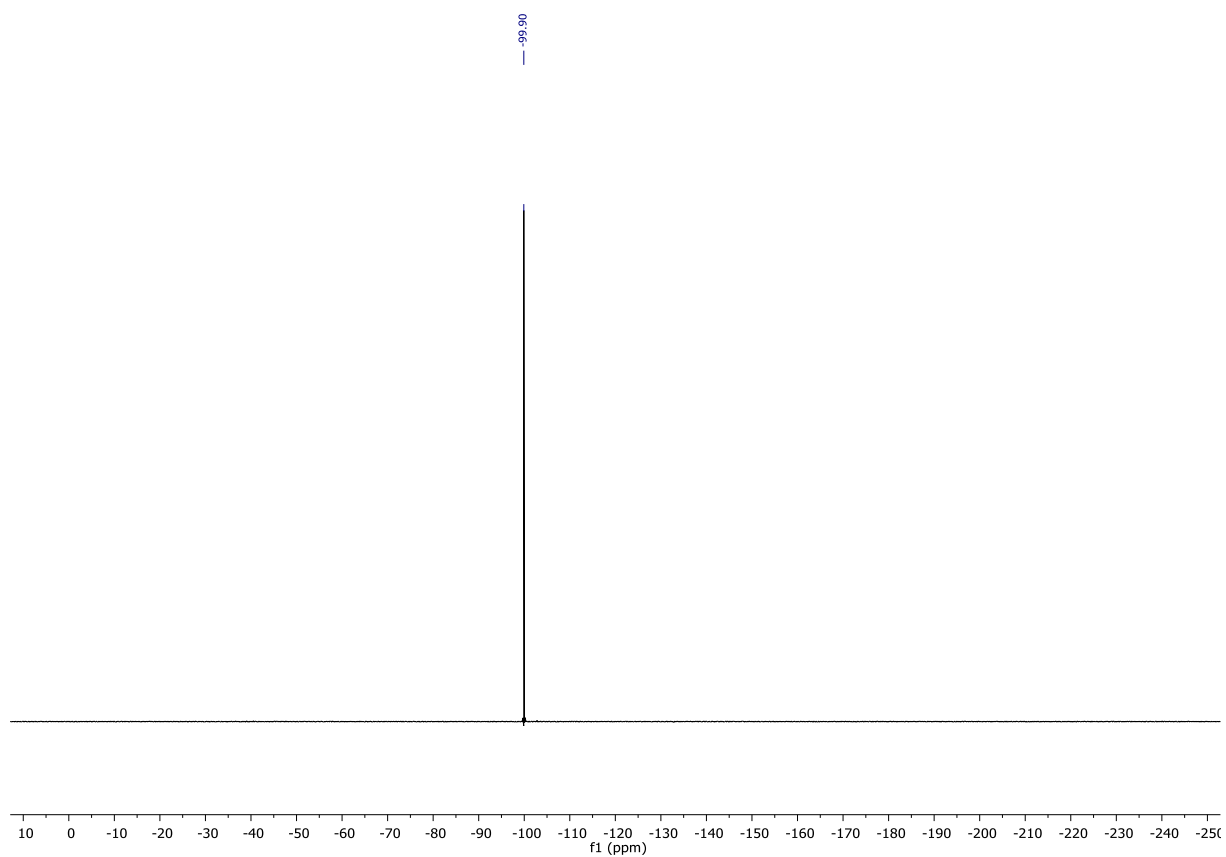

### <sup>1</sup>H NMR of 5c

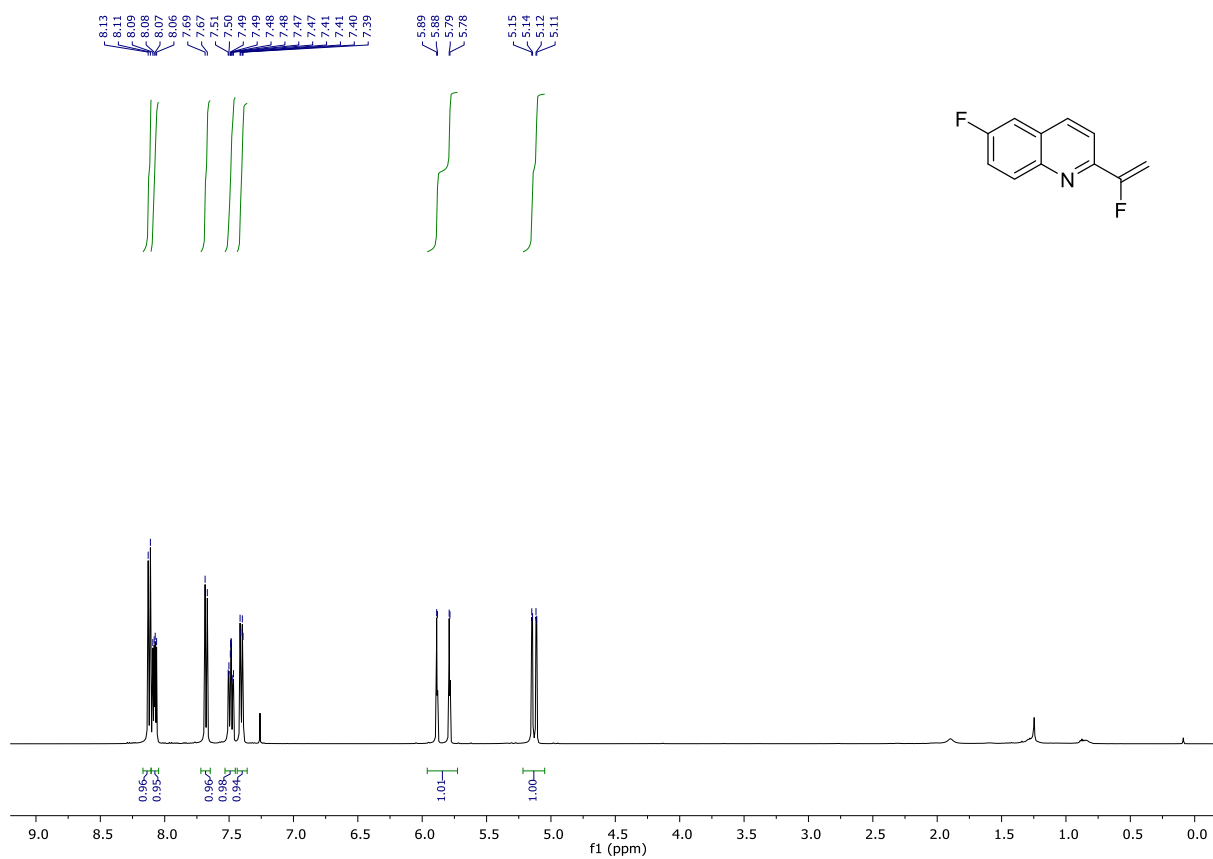

### <sup>13</sup>C NMR of 5c

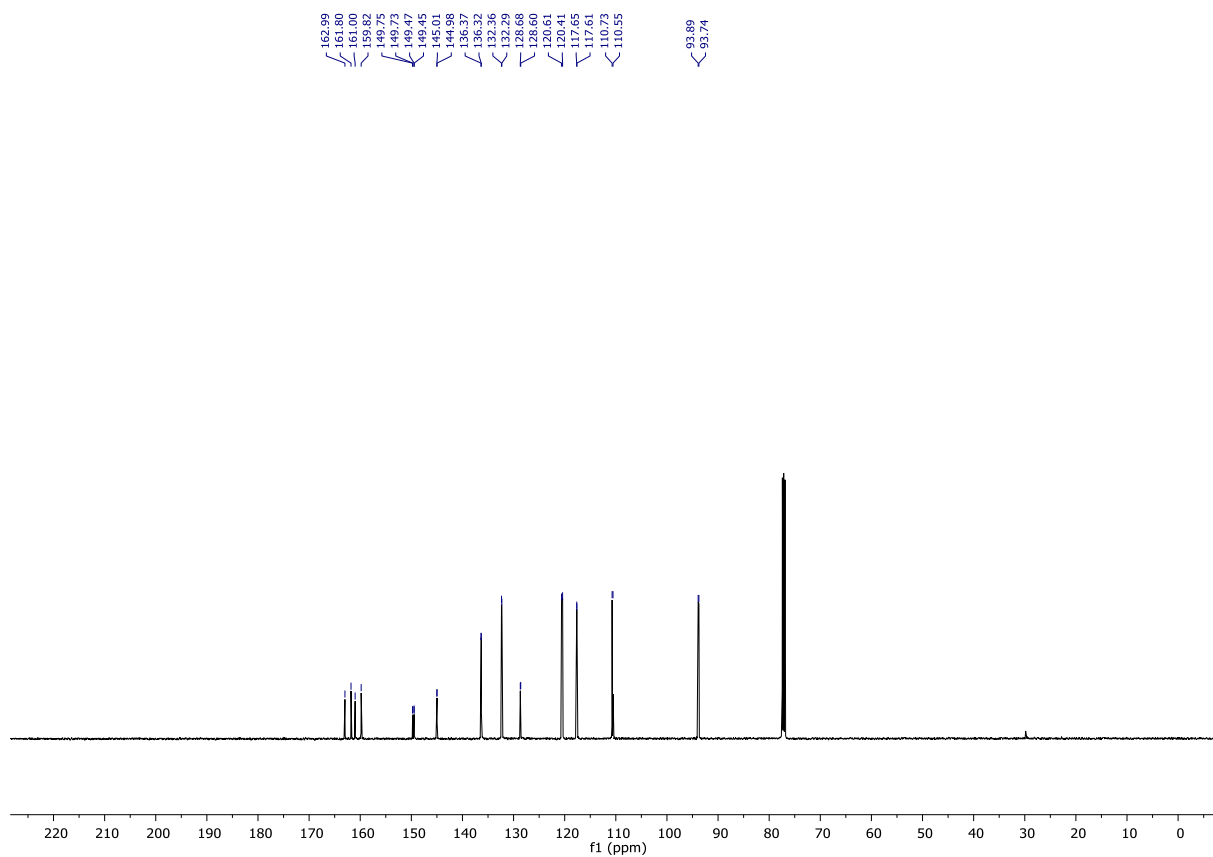

### $^{19}\text{F}$ NMR of 5c

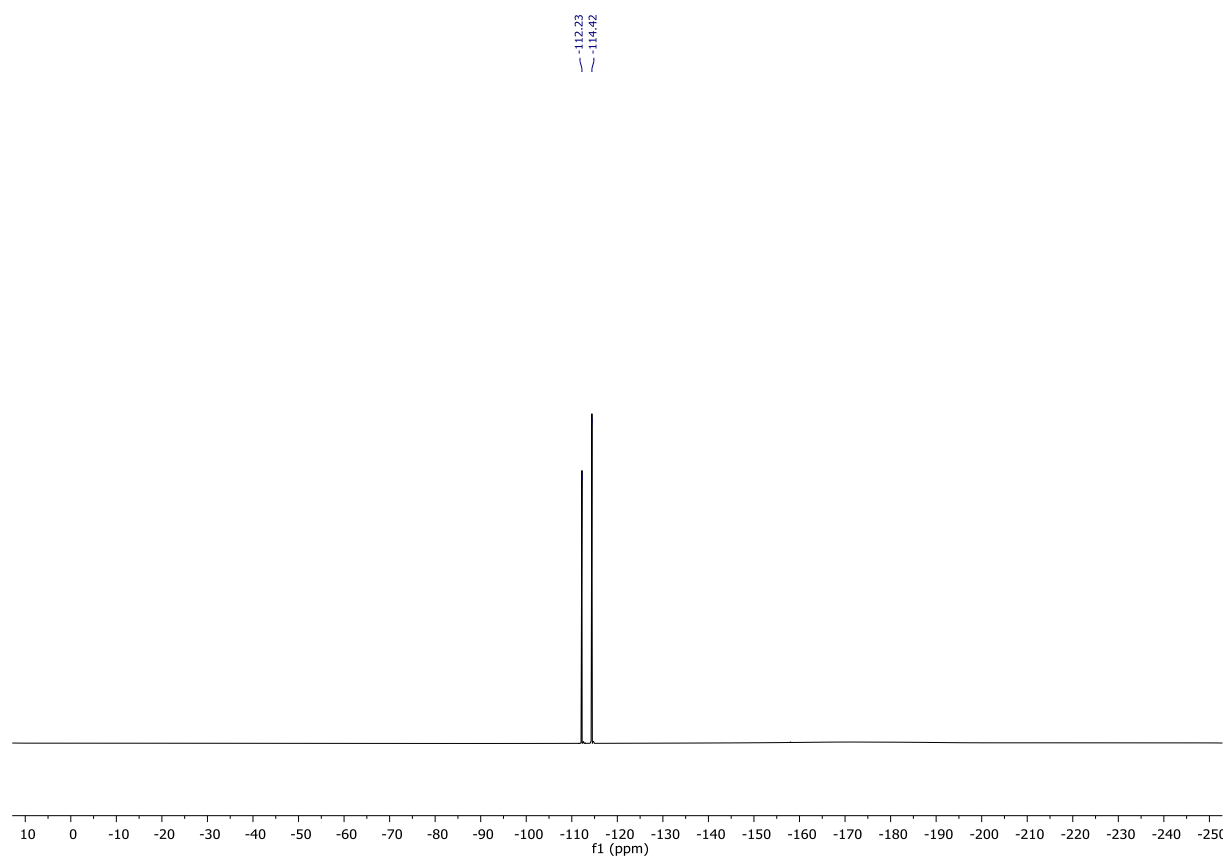

### $^1\text{H}$ NMR of 5d

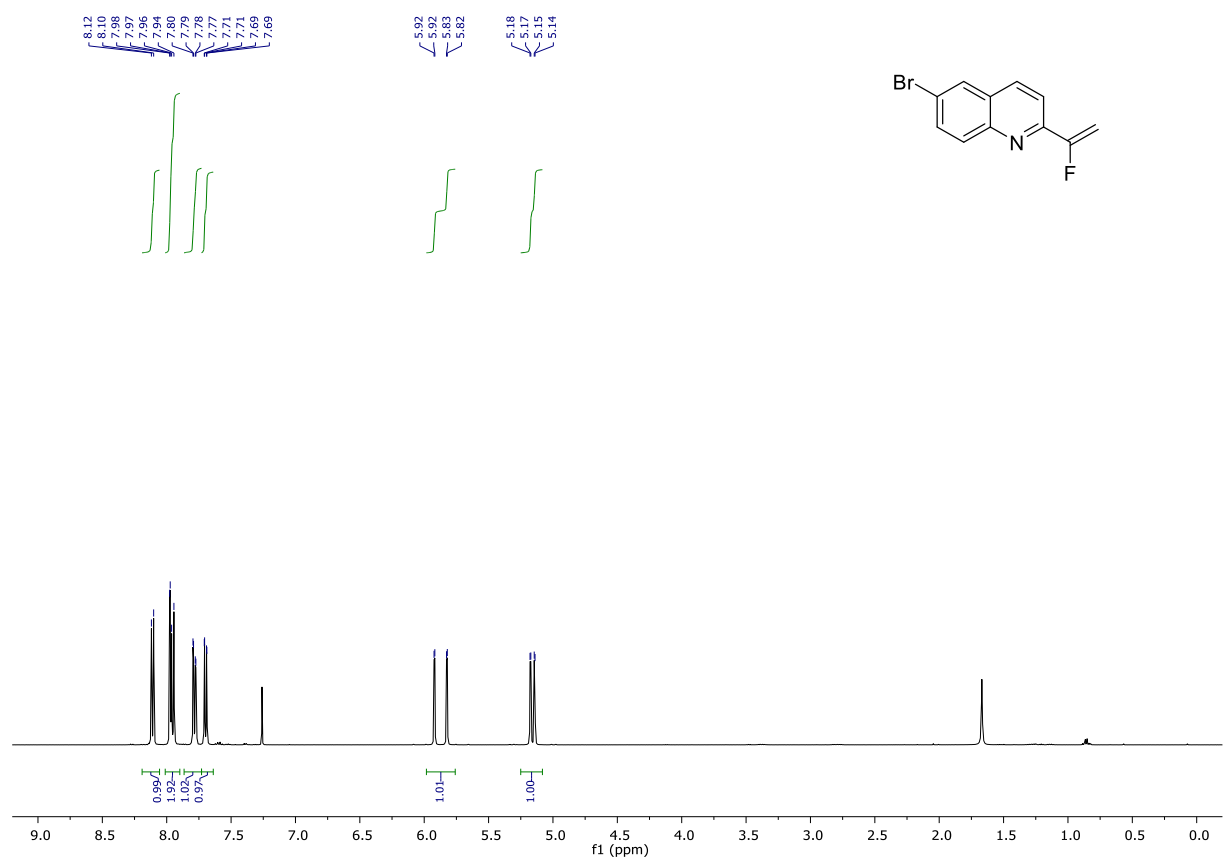

### <sup>13</sup>C NMR of 5d

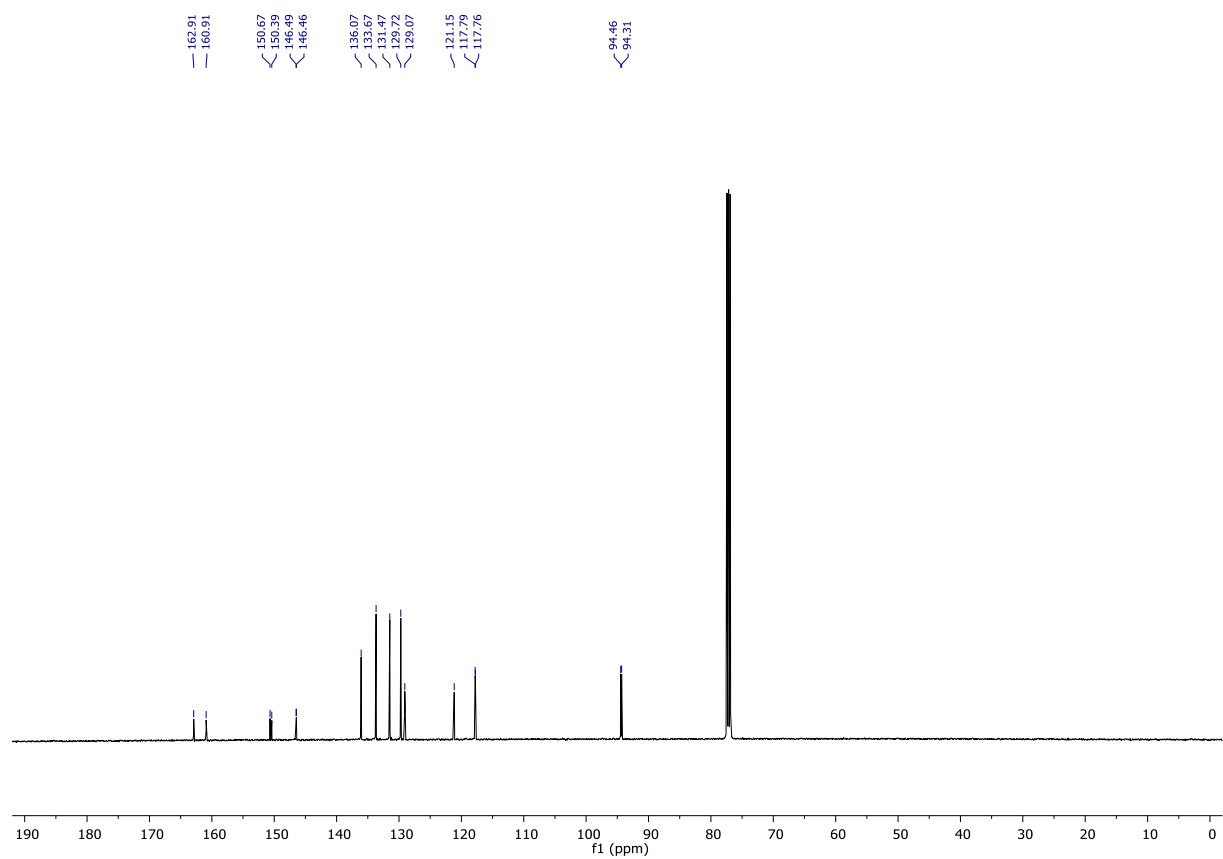

### <sup>19</sup>F NMR of 5d

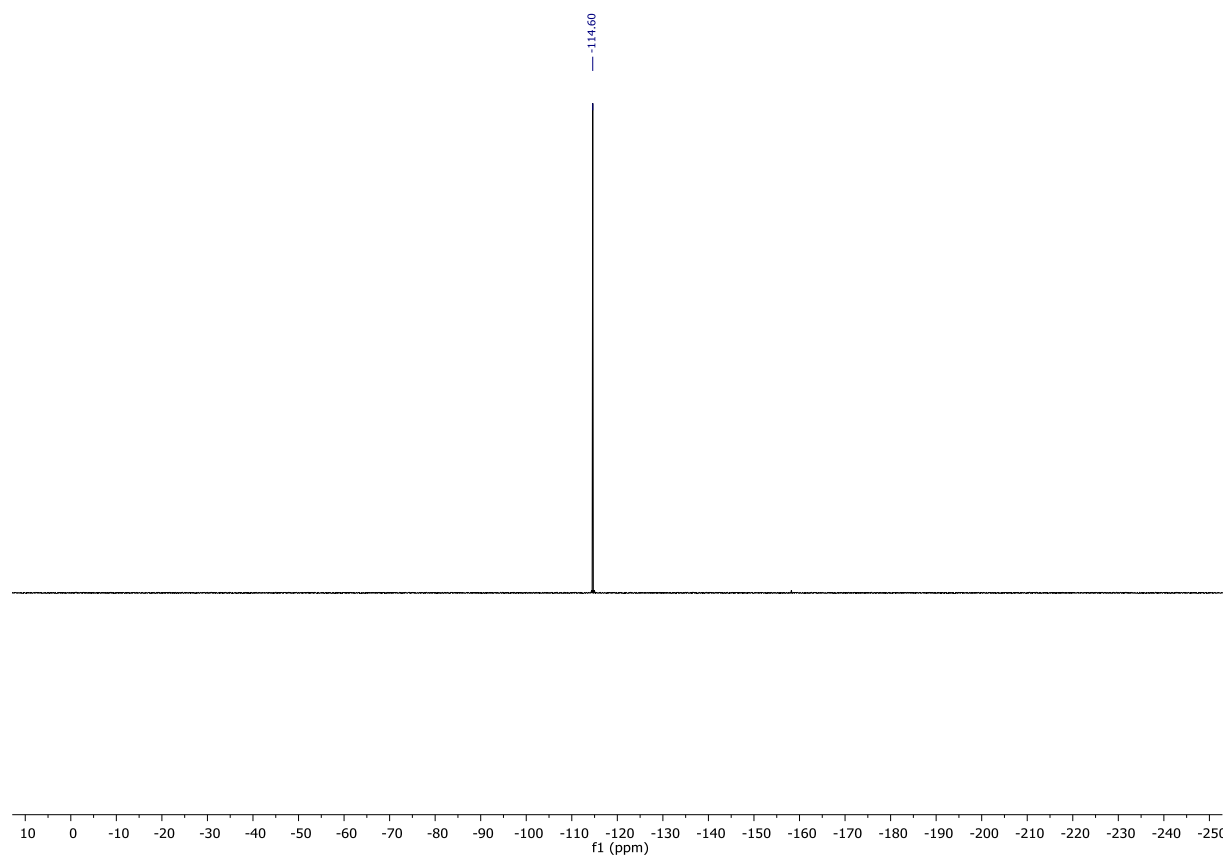

### <sup>1</sup>H NMR of 5e

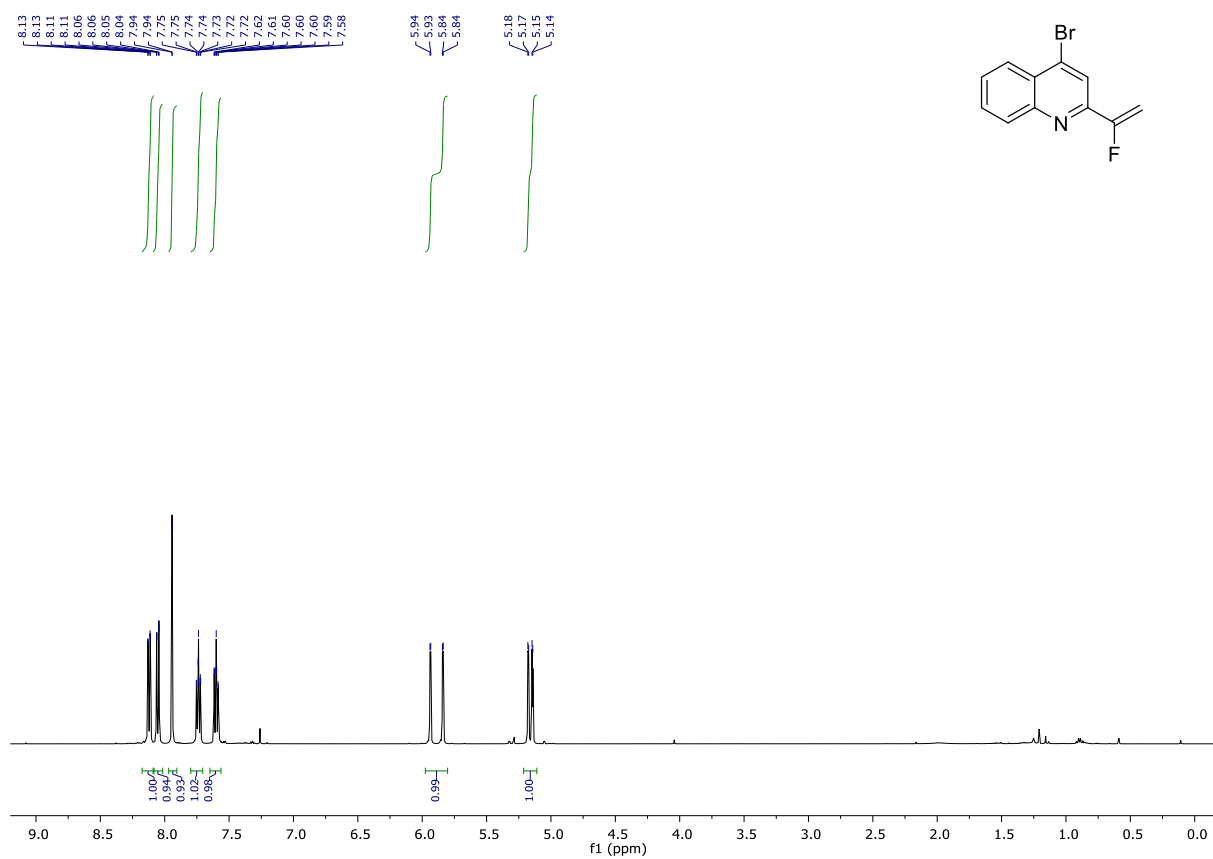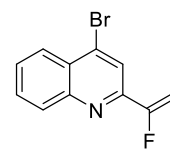

### <sup>13</sup>C NMR of 5e

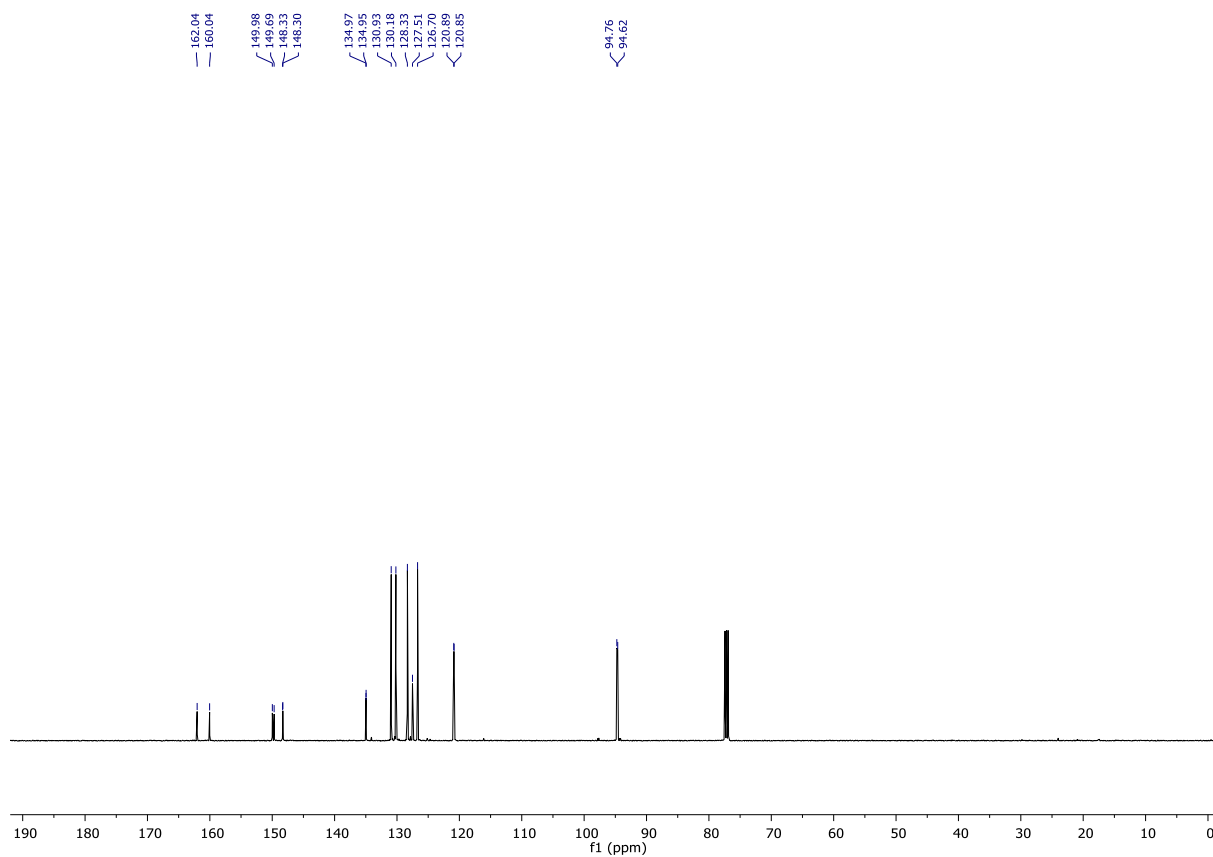



### $^{19}\text{F}$ NMR of 5e

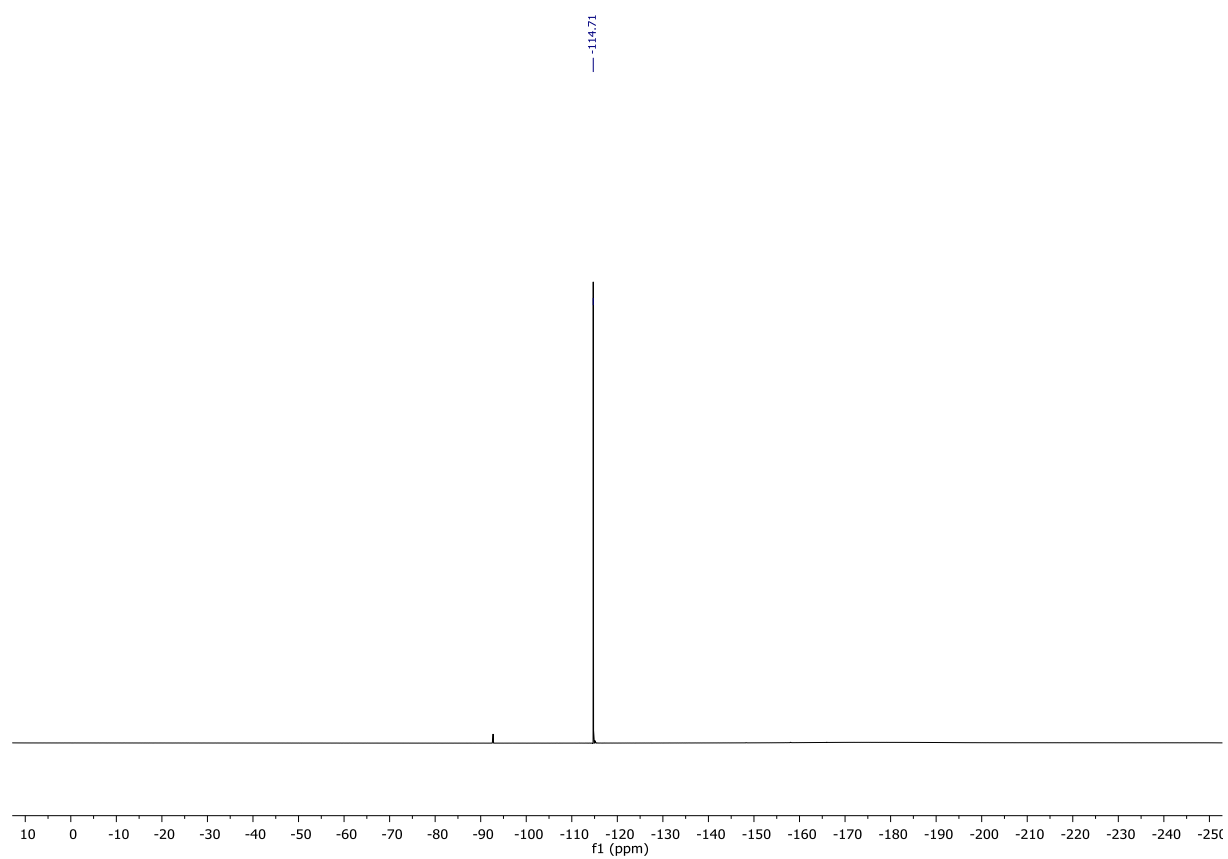

### $^1\text{H}$ NMR of 5f

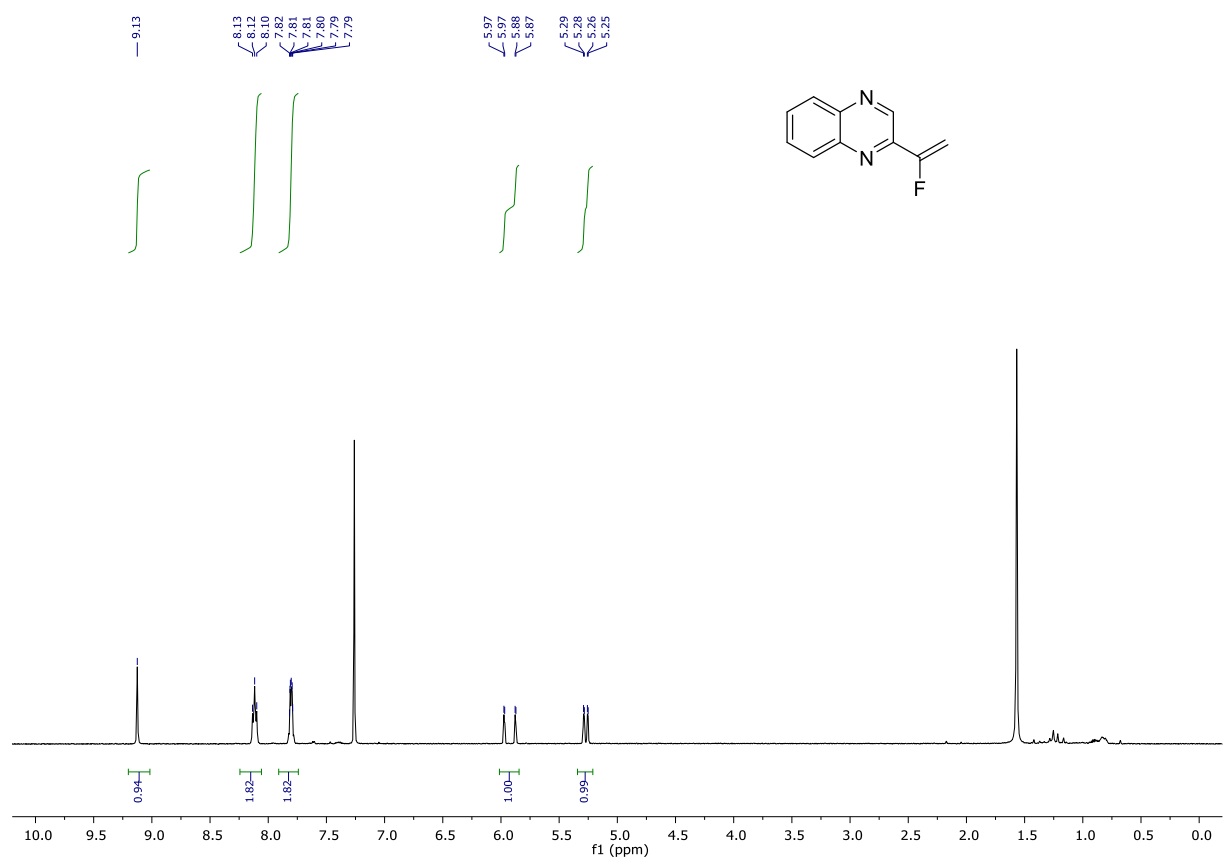

### <sup>13</sup>C NMR of 5f

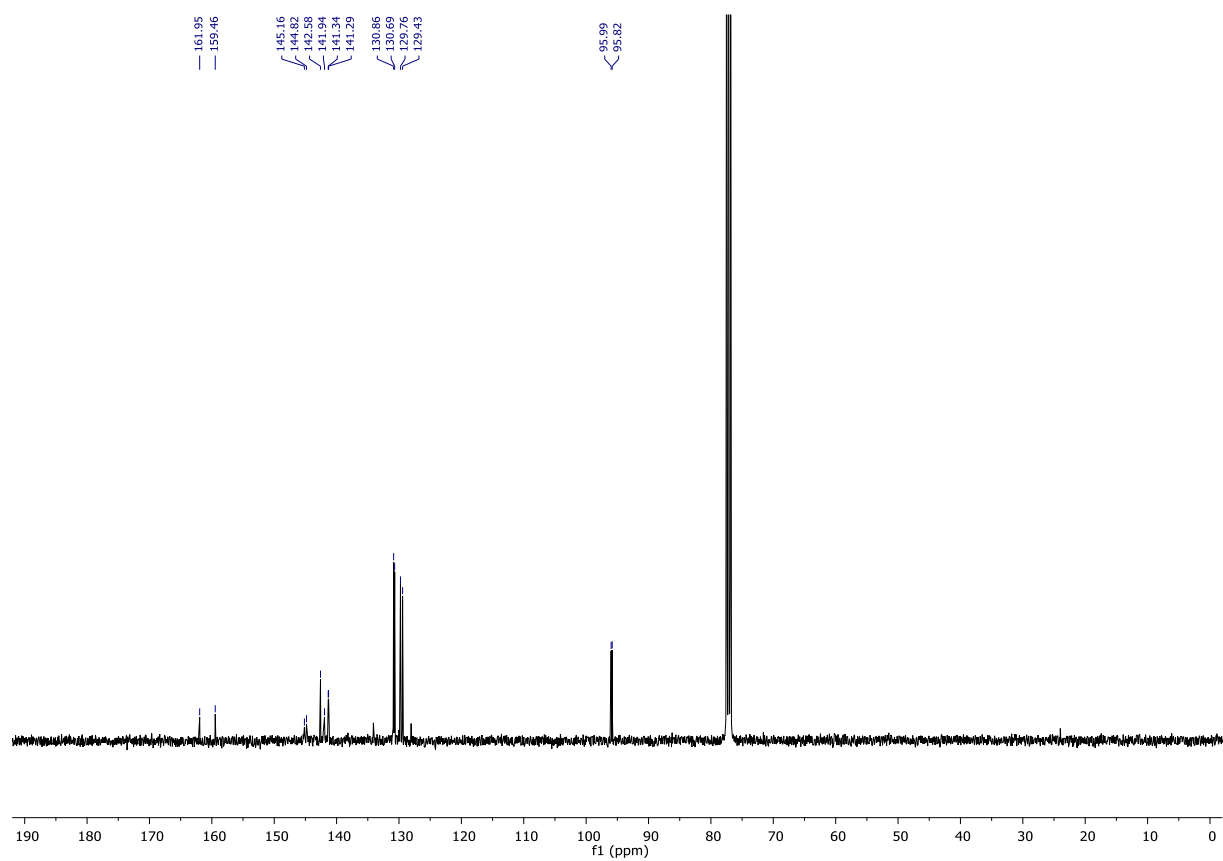

### <sup>19</sup>F NMR of 5f

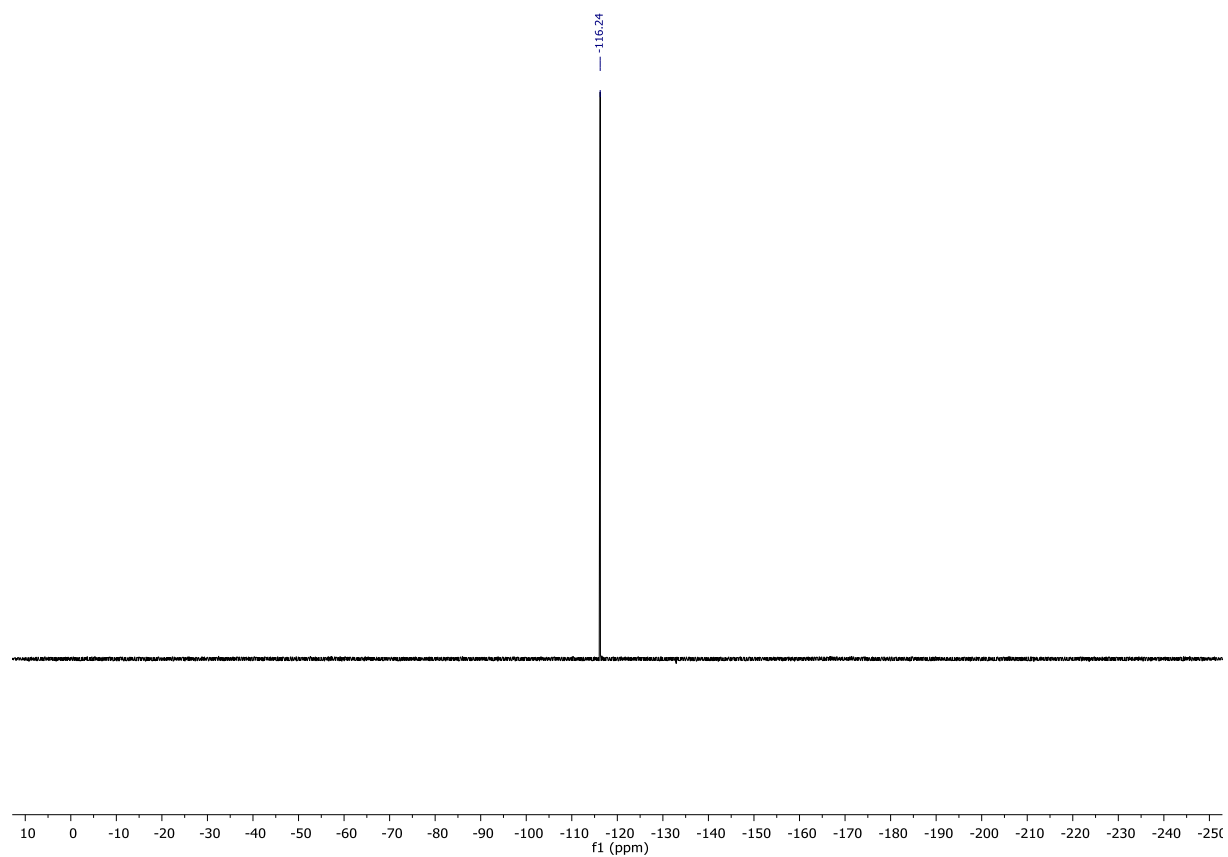

### <sup>1</sup>H NMR of 5g

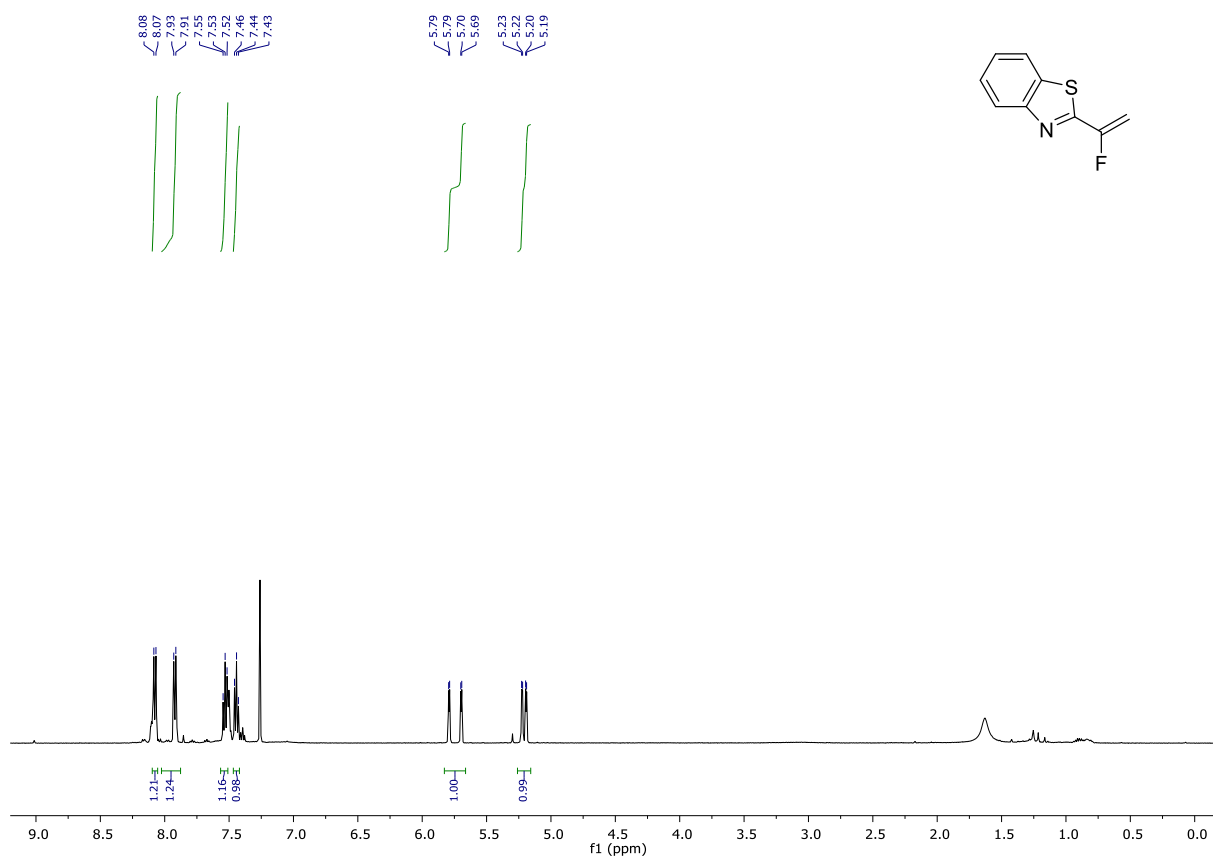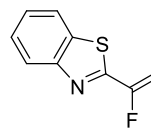

### <sup>13</sup>C NMR of 5g

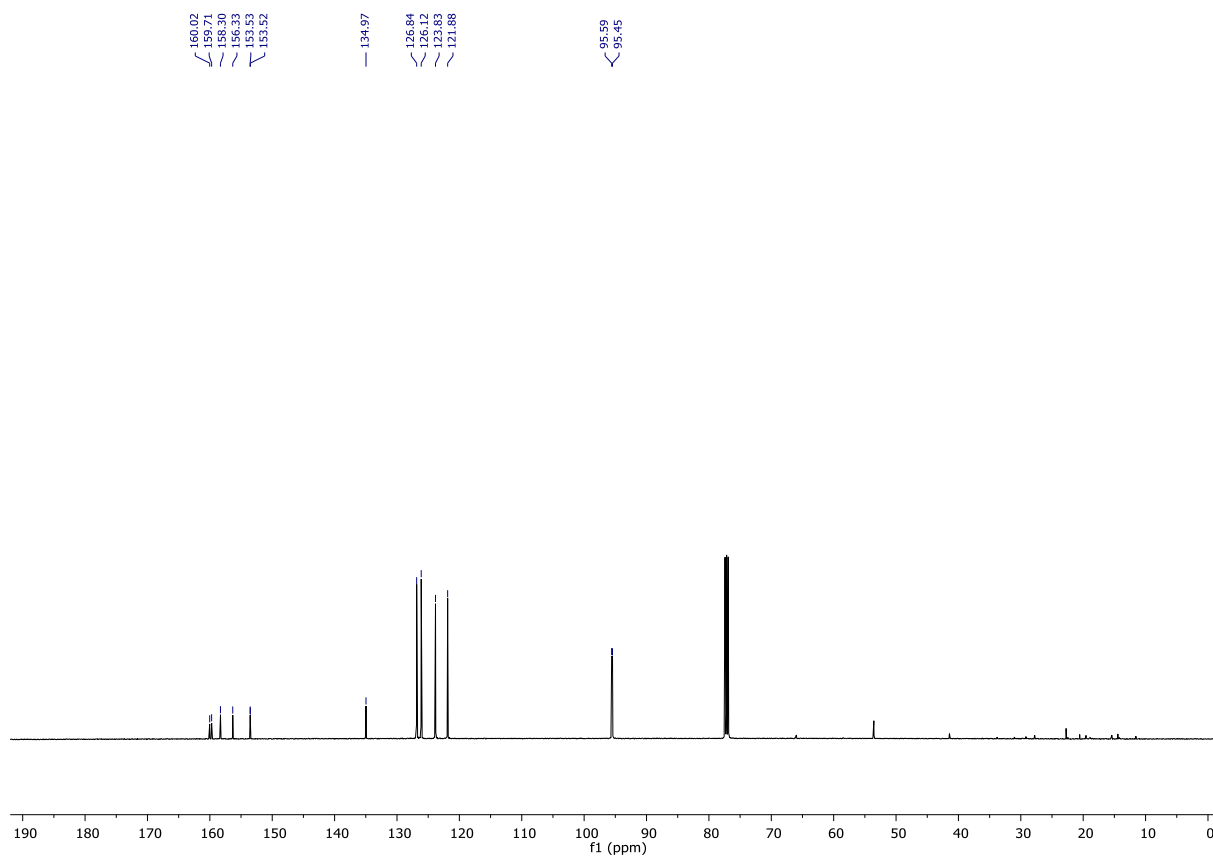

### $^{19}\text{F}$ NMR of 5g

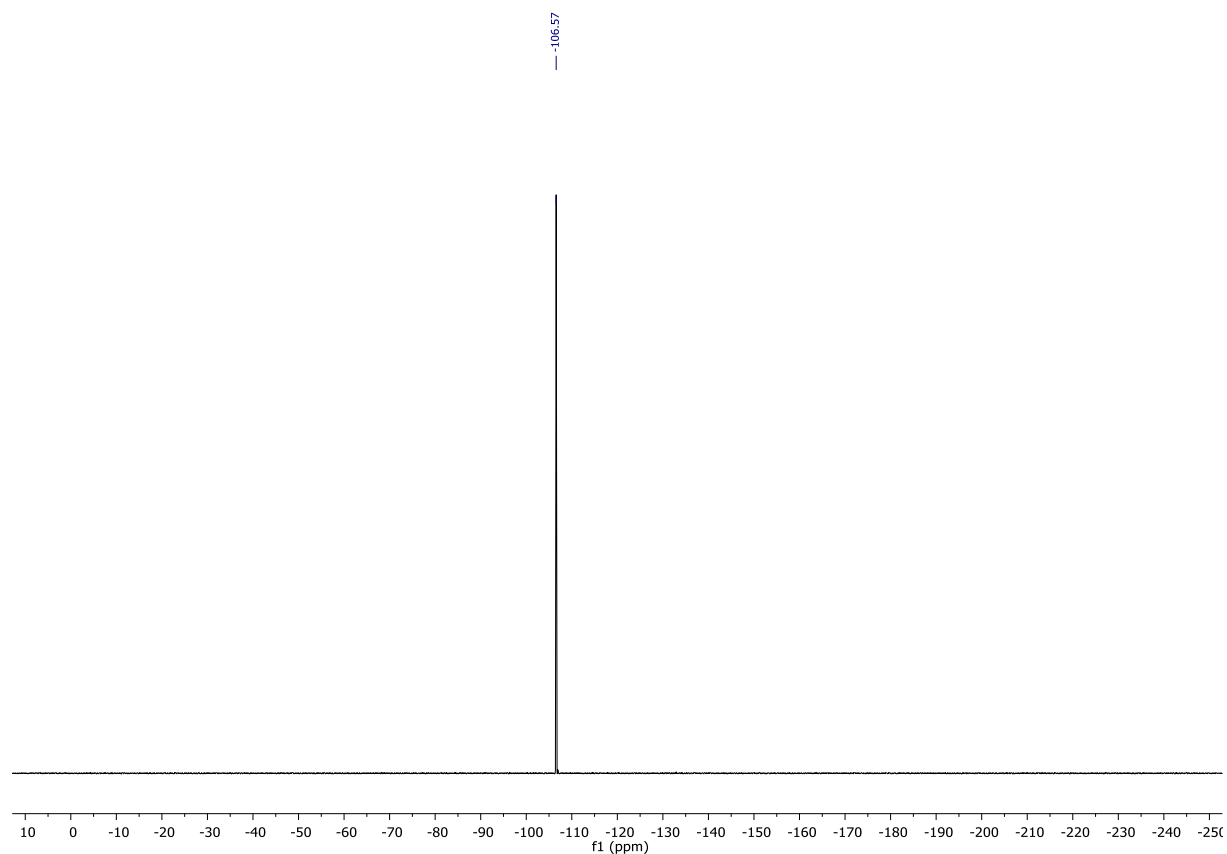

### $^1\text{H}$ NMR of 5h

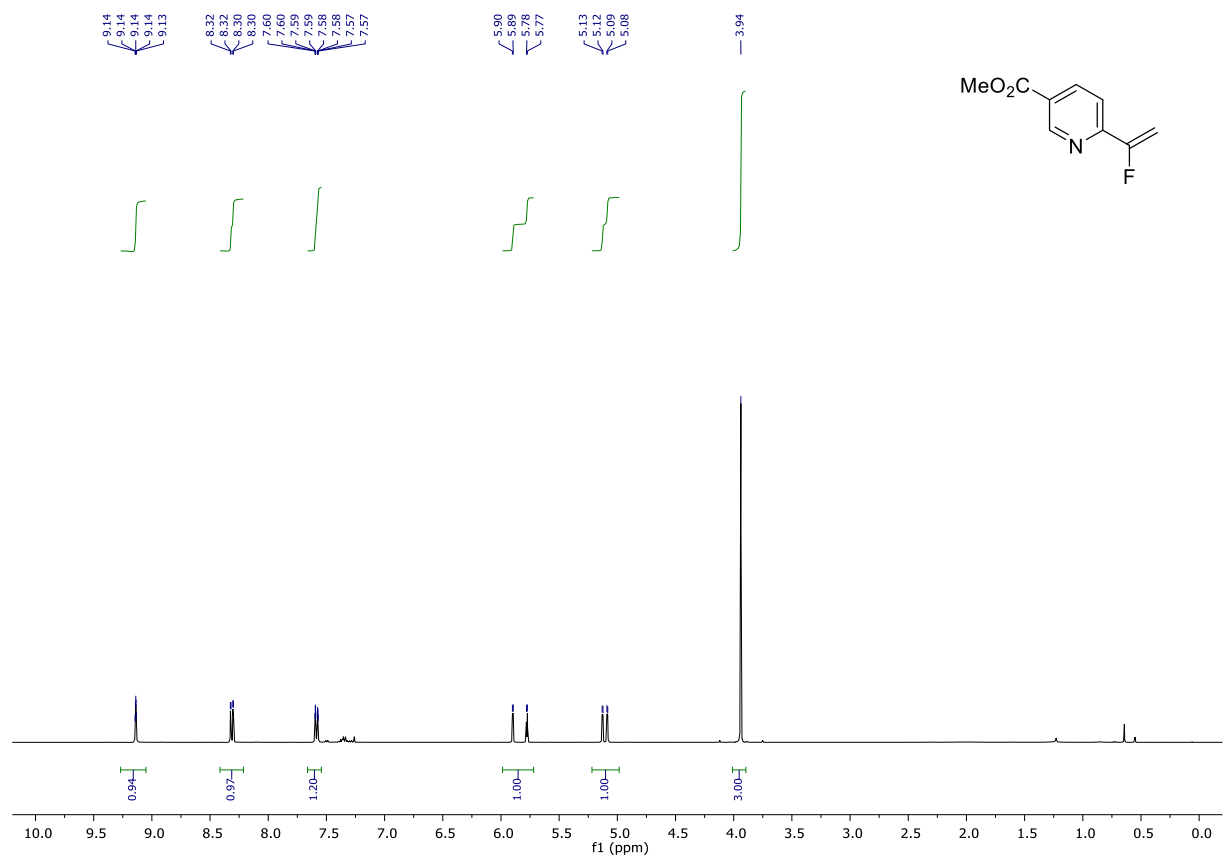

### <sup>13</sup>C NMR of 5h

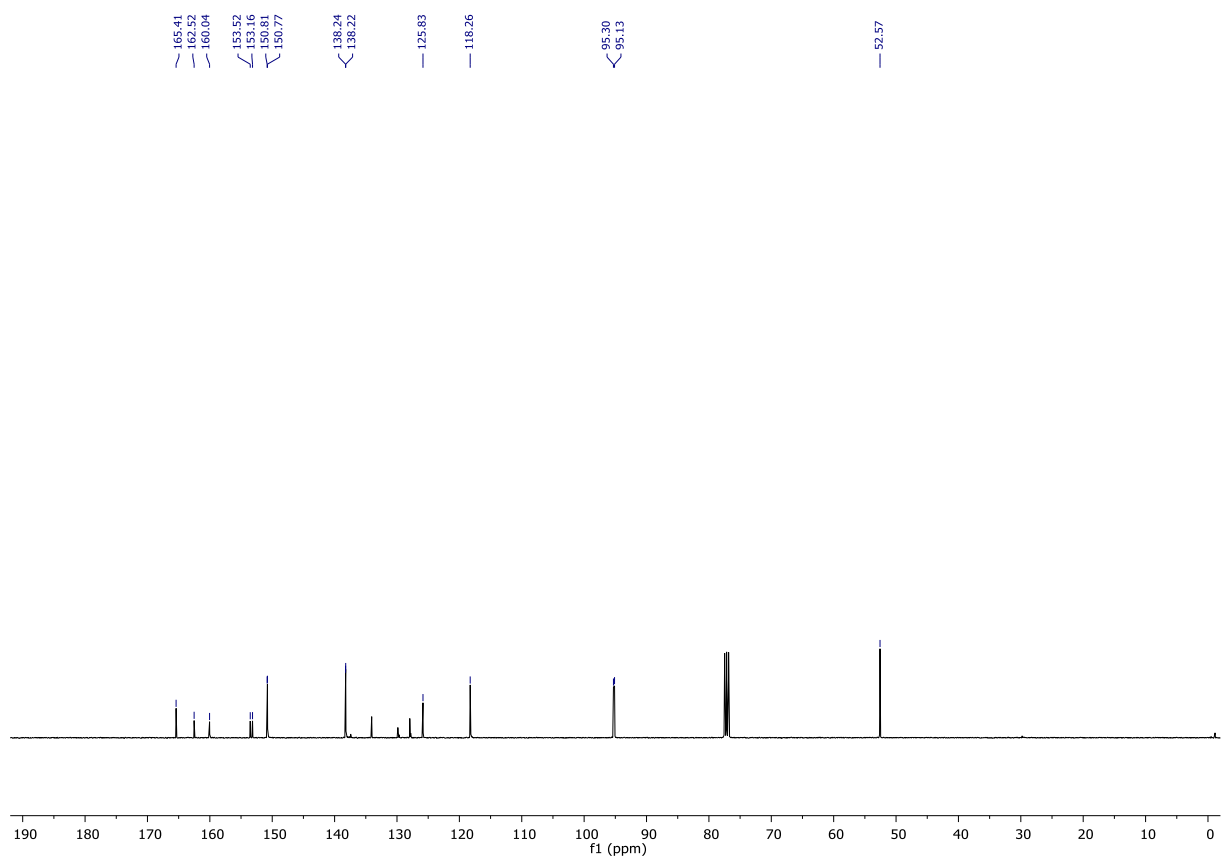

### <sup>19</sup>F NMR of 5h

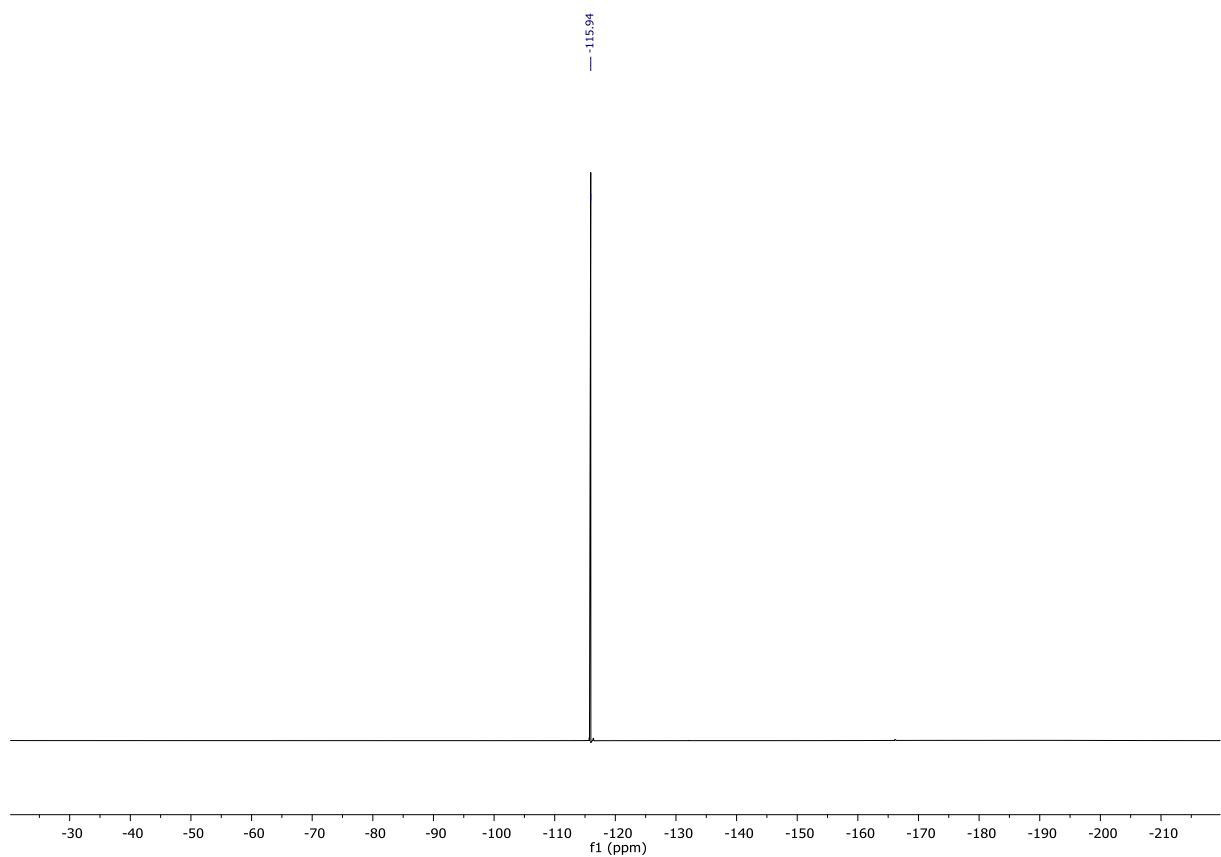

### <sup>1</sup>H NMR of 5i

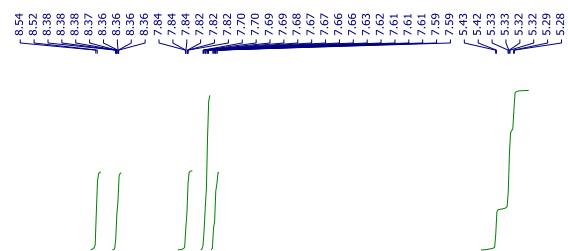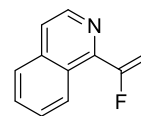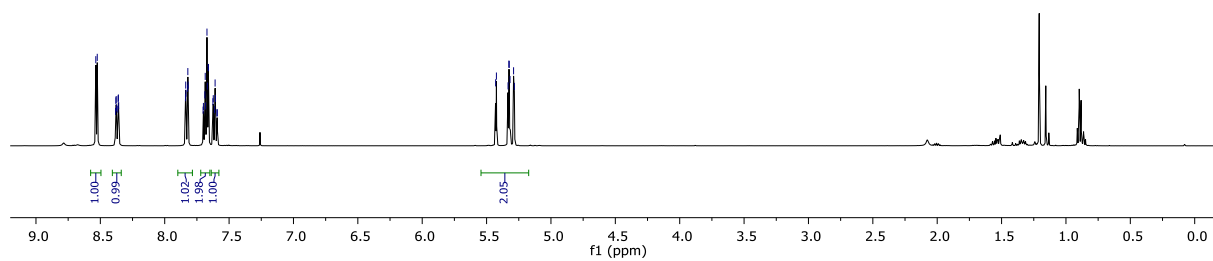

### <sup>13</sup>C NMR of 5i

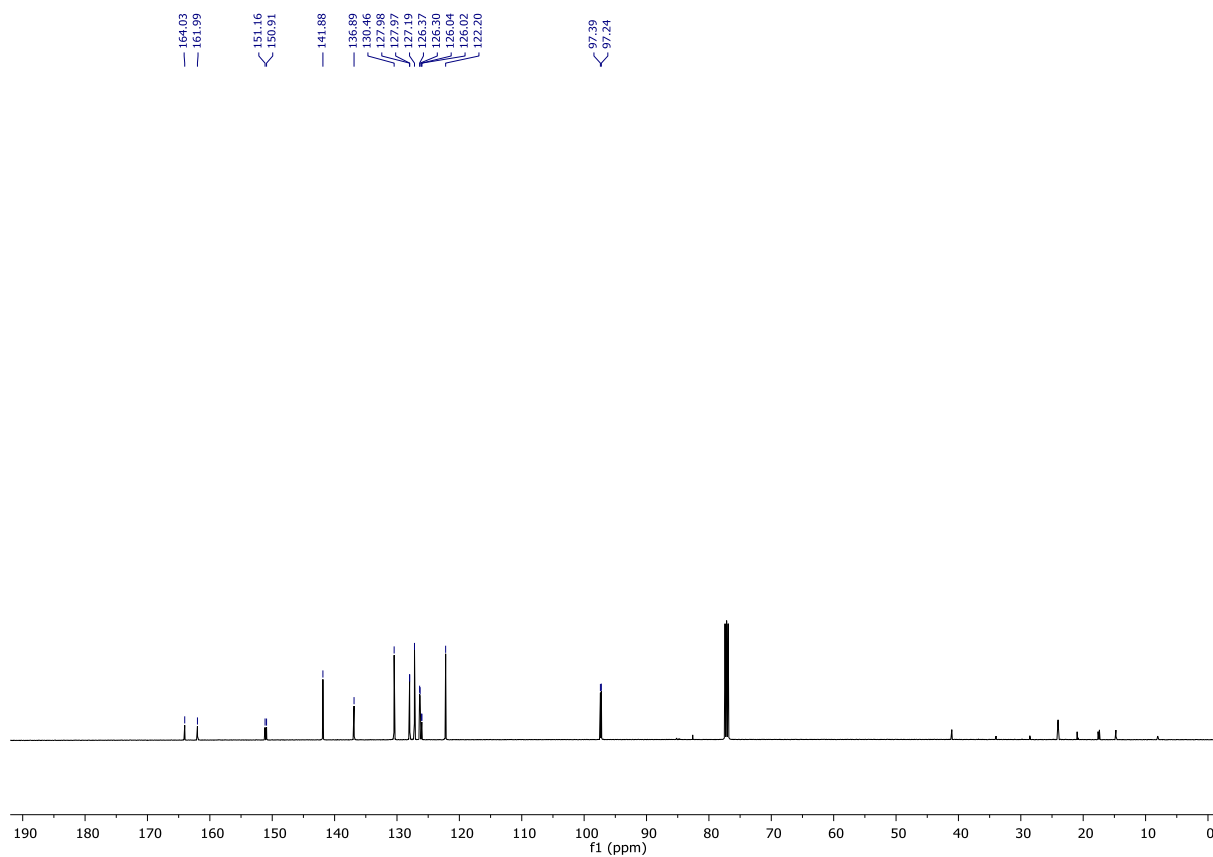

### <sup>19</sup>F NMR of 5i

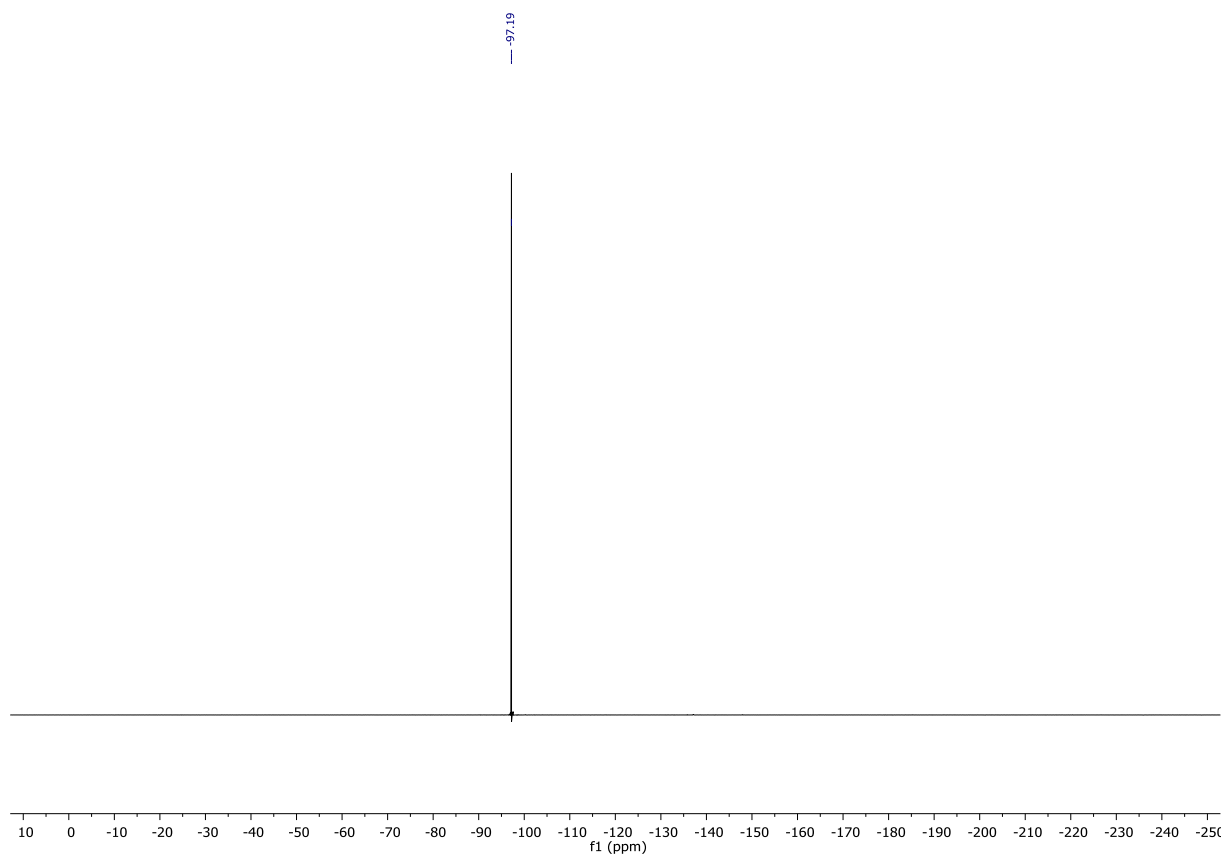

### <sup>1</sup>H NMR of 5j

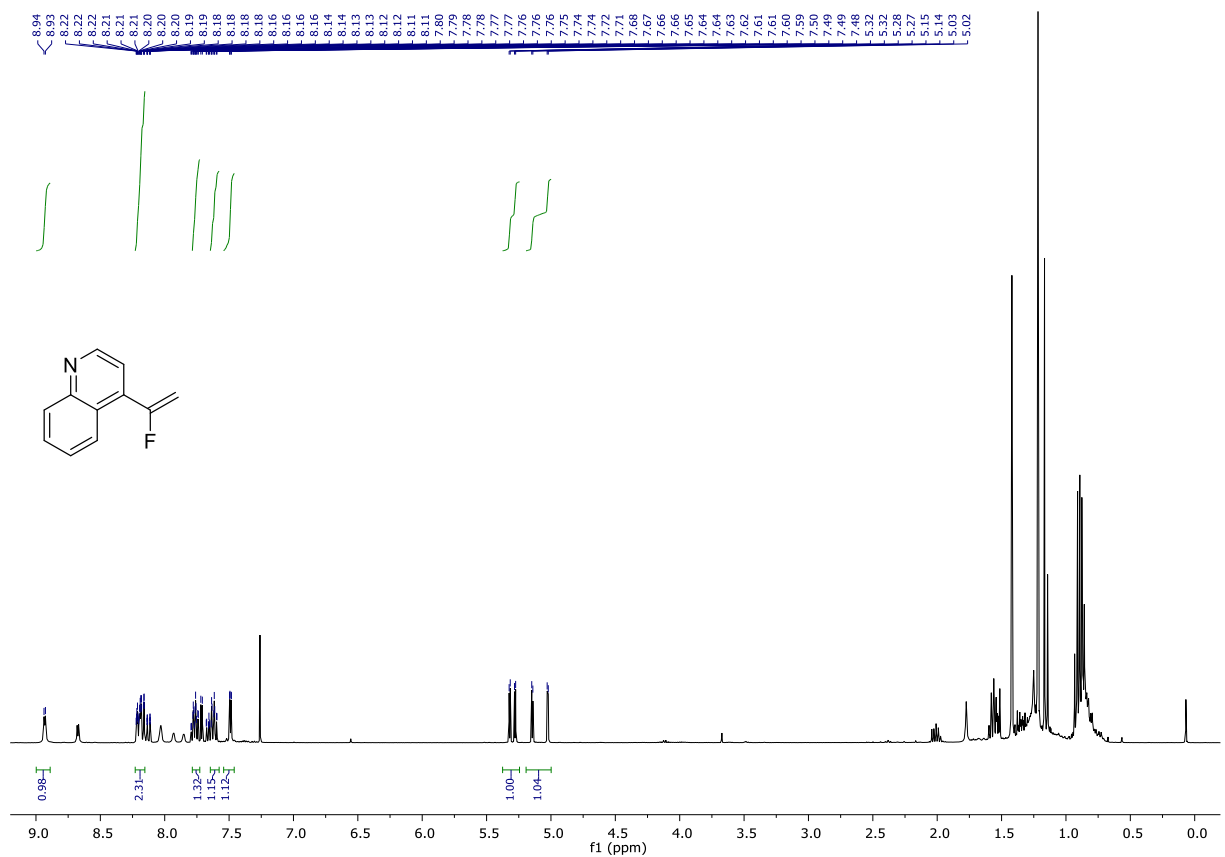

### <sup>13</sup>C NMR of 5j

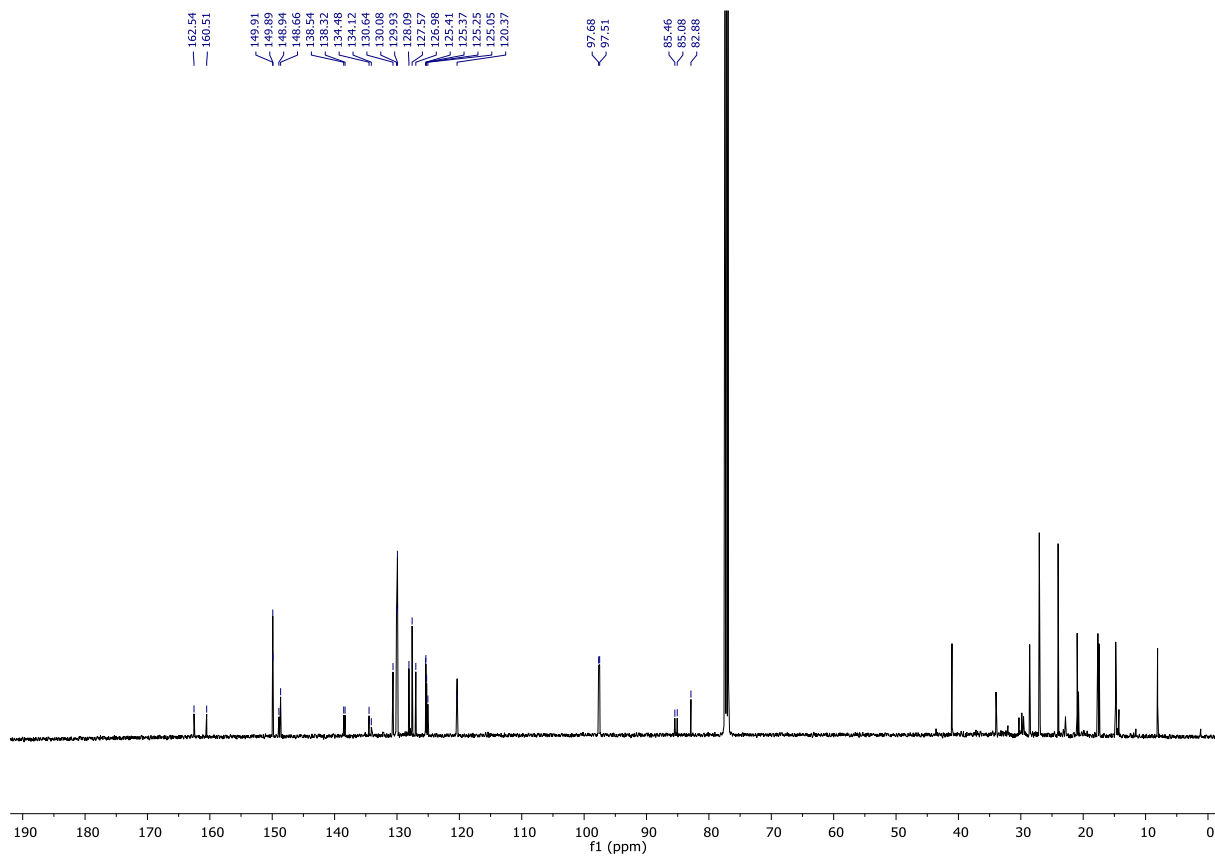

### <sup>19</sup>F NMR of 5j

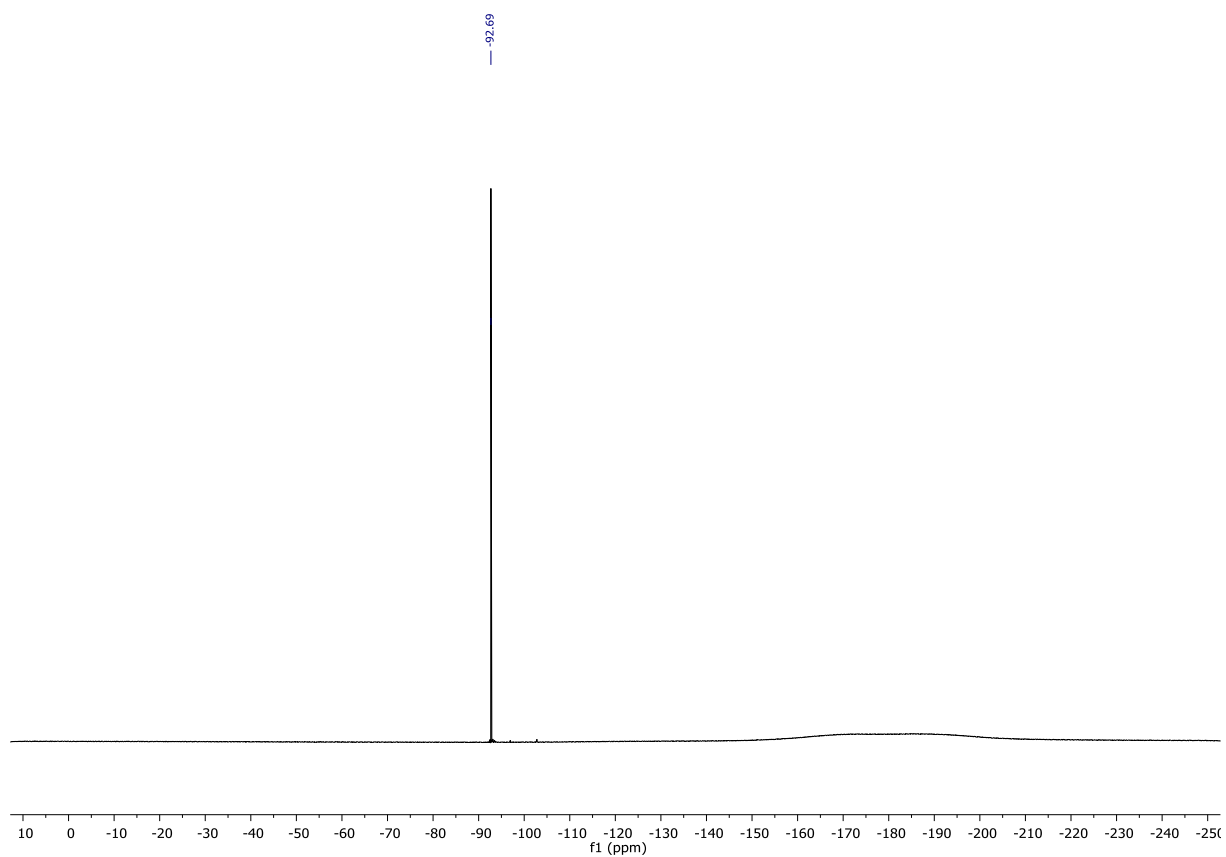



### <sup>1</sup>H NMR of 5k

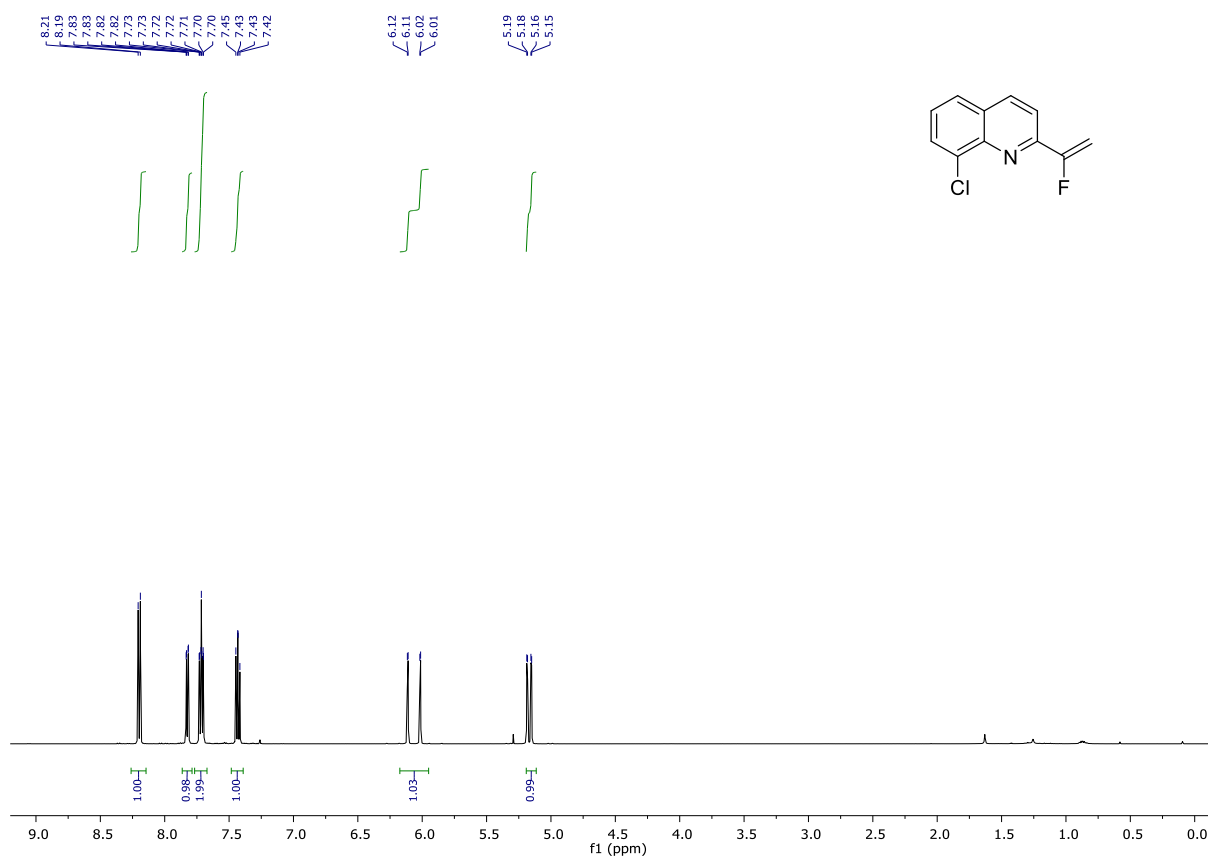

### <sup>13</sup>C NMR of 5k

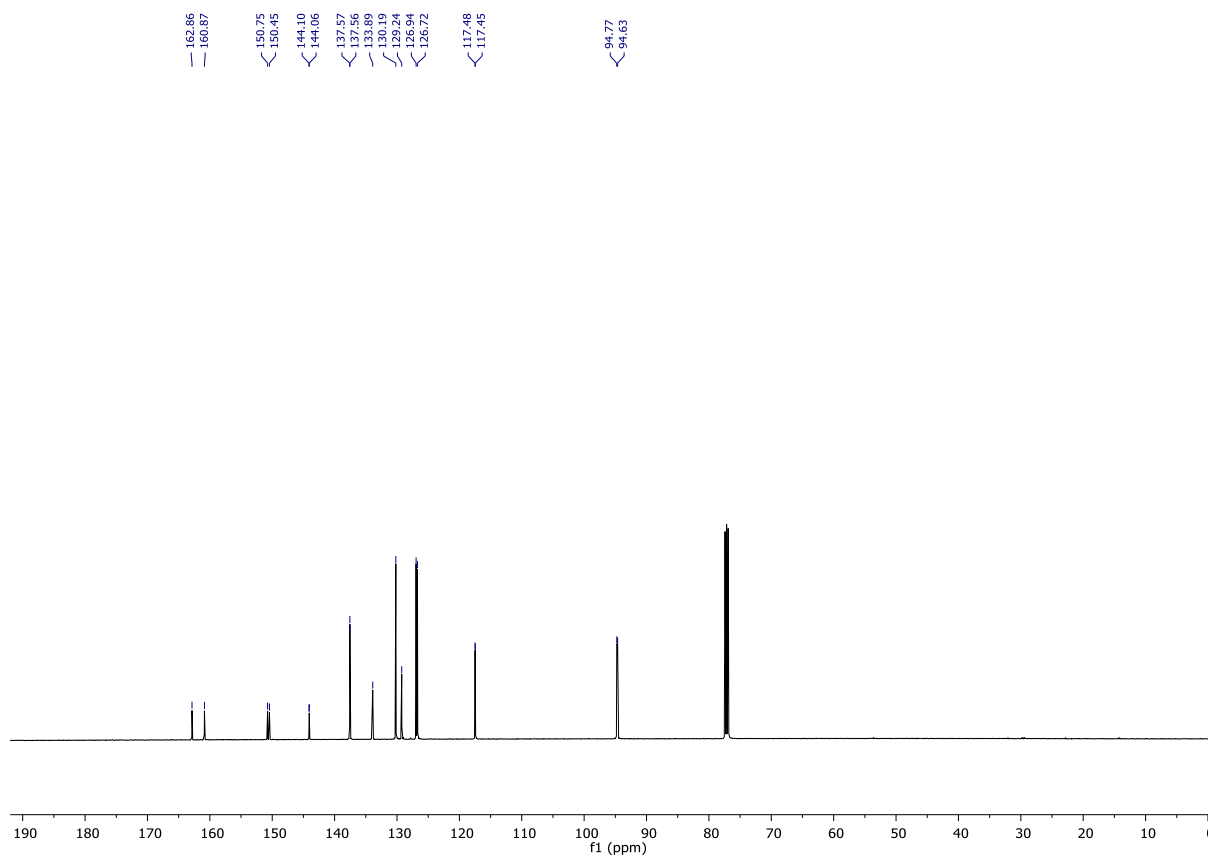

### <sup>19</sup>F NMR of 5k

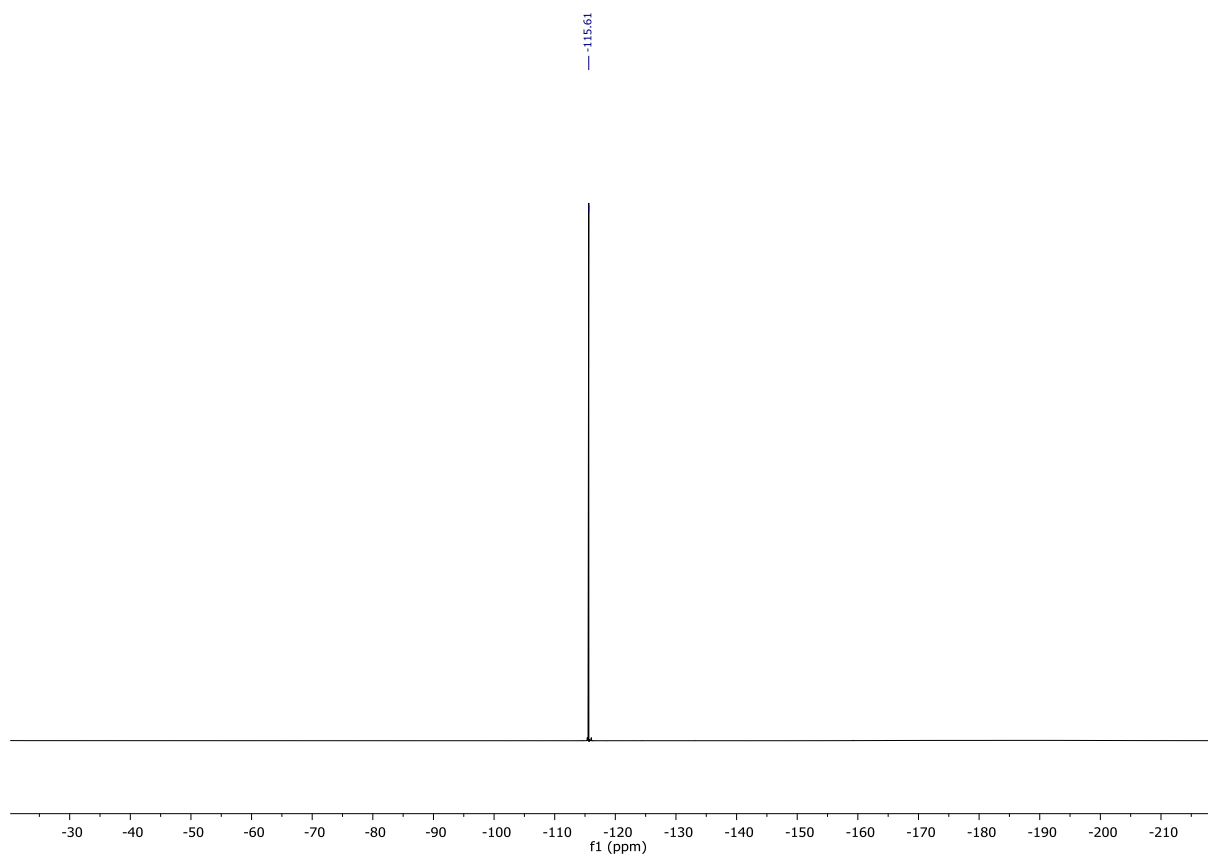

### <sup>1</sup>H NMR of 7a

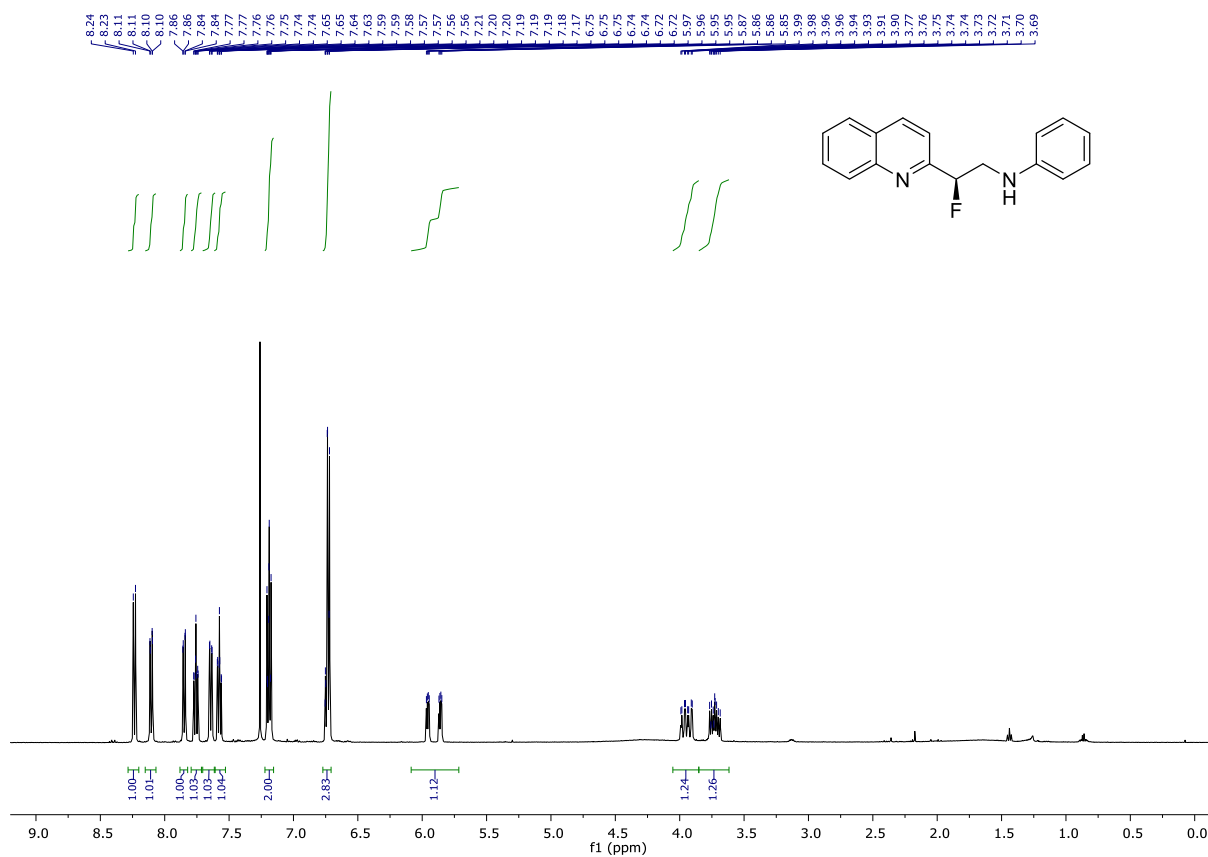

### <sup>13</sup>C NMR of 7a

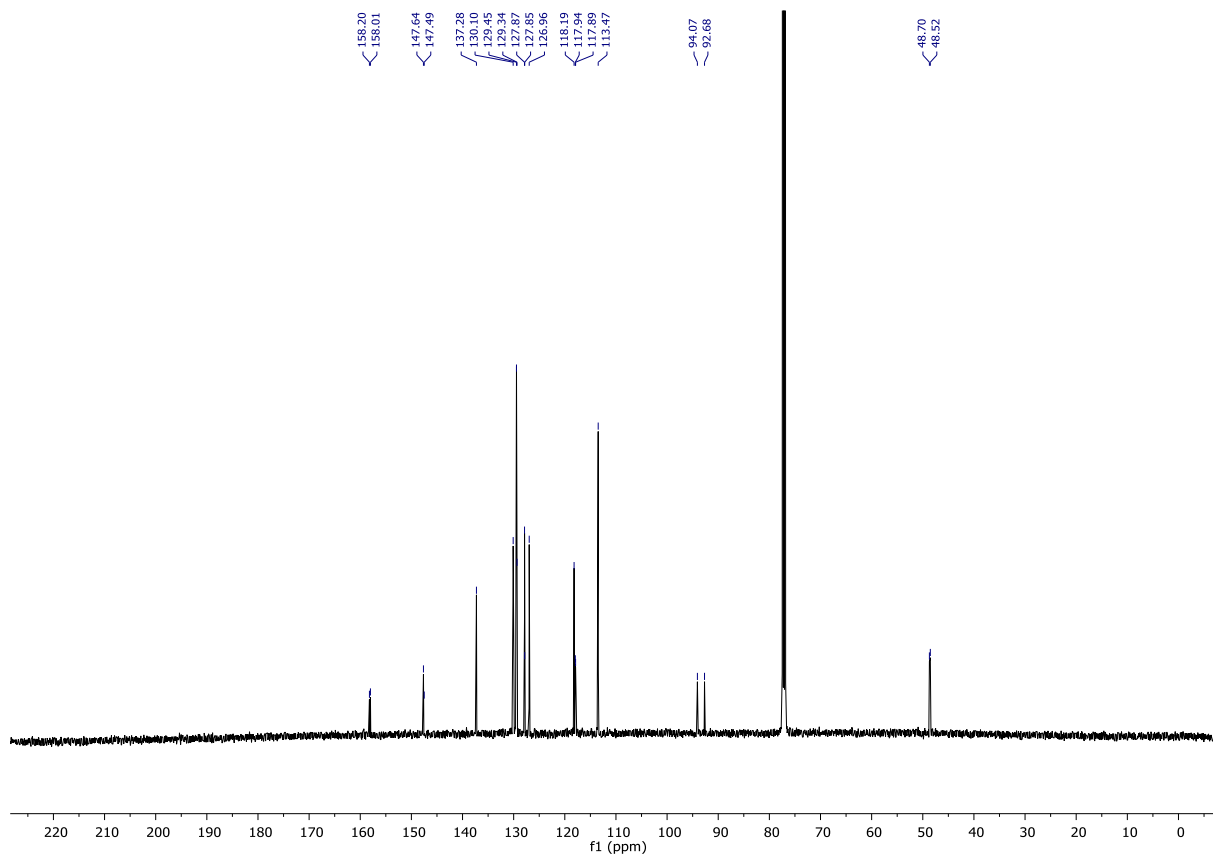

### <sup>19</sup>F NMR of 7a

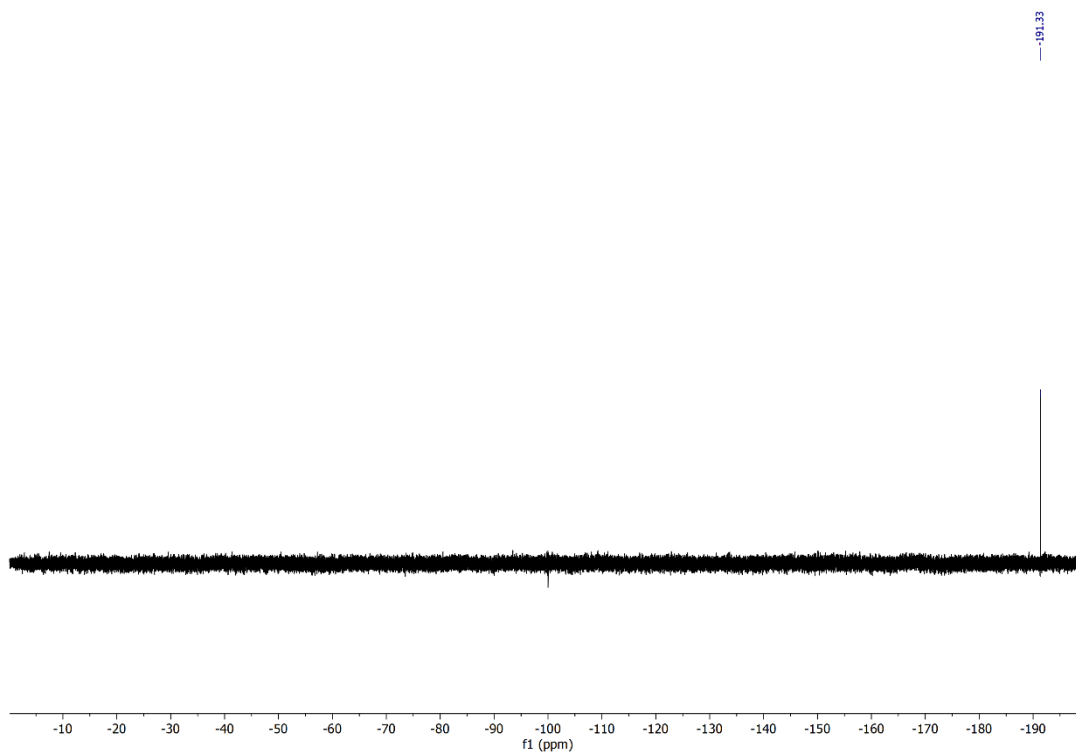

### <sup>1</sup>H NMR of 7b

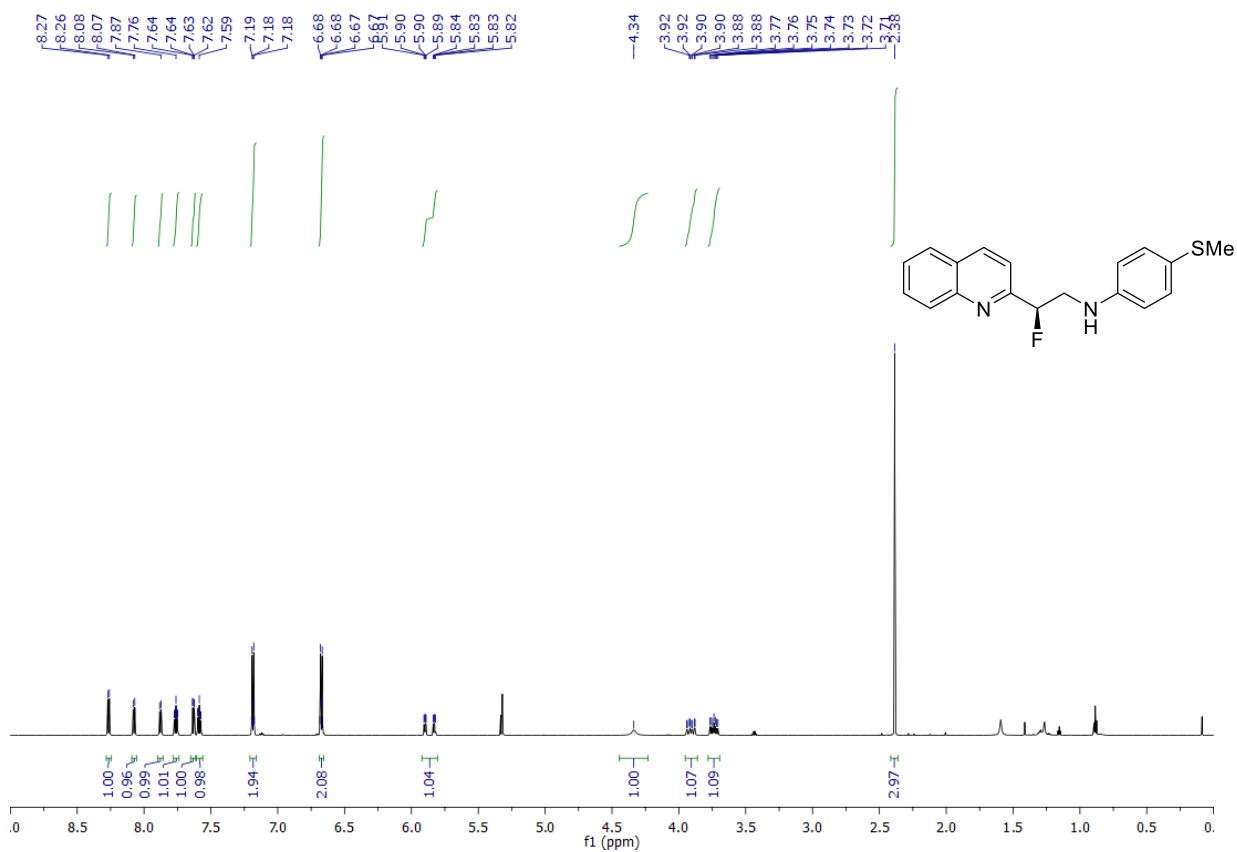

### <sup>13</sup>C NMR of 7b

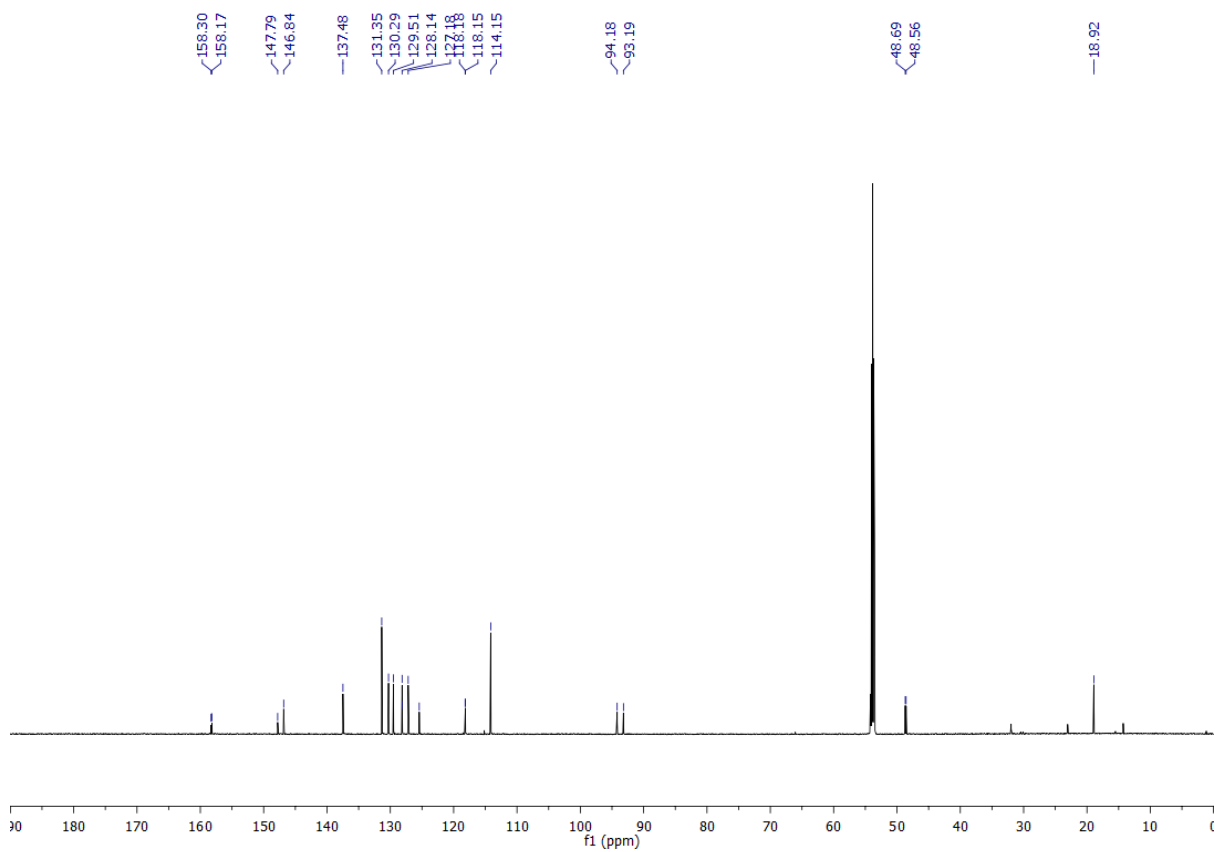

### <sup>19</sup>F NMR of 7b

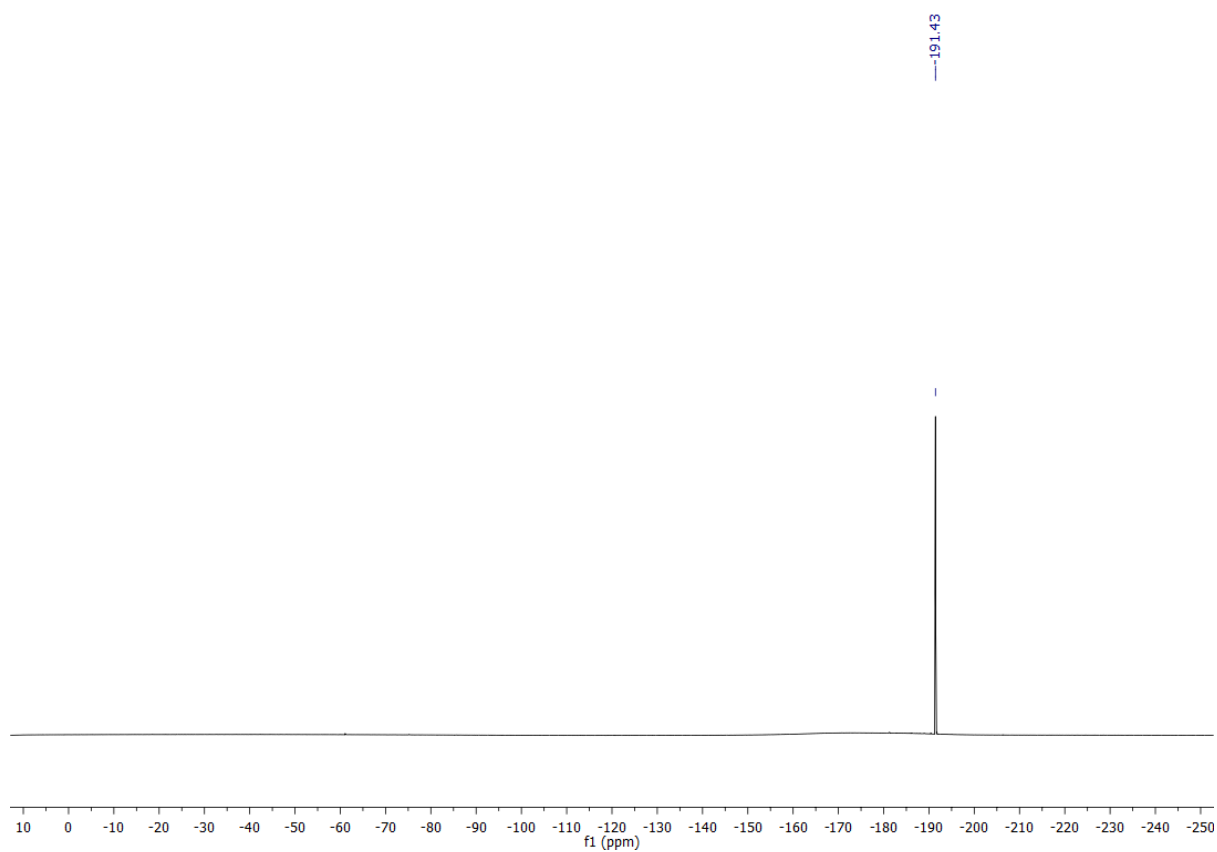

### <sup>1</sup>H NMR of 7c

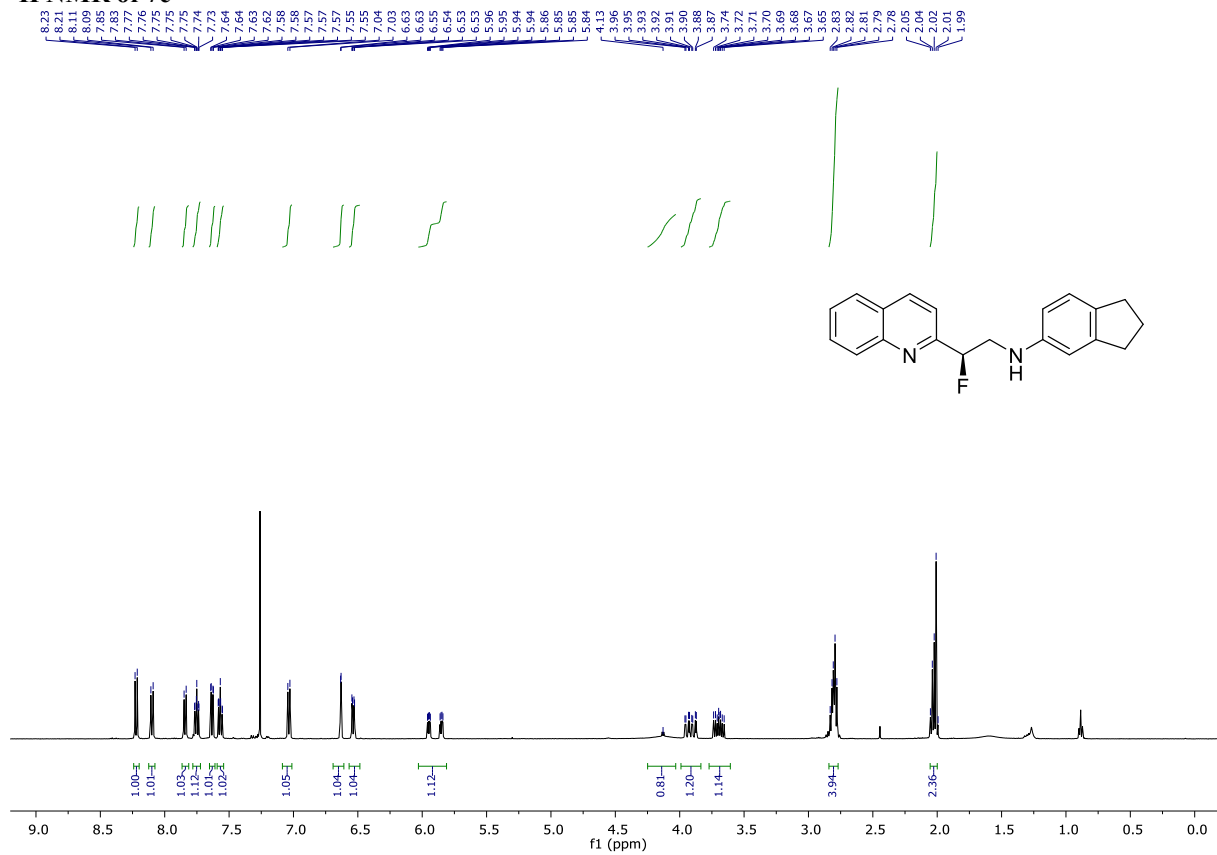

### <sup>13</sup>C NMR of 7c

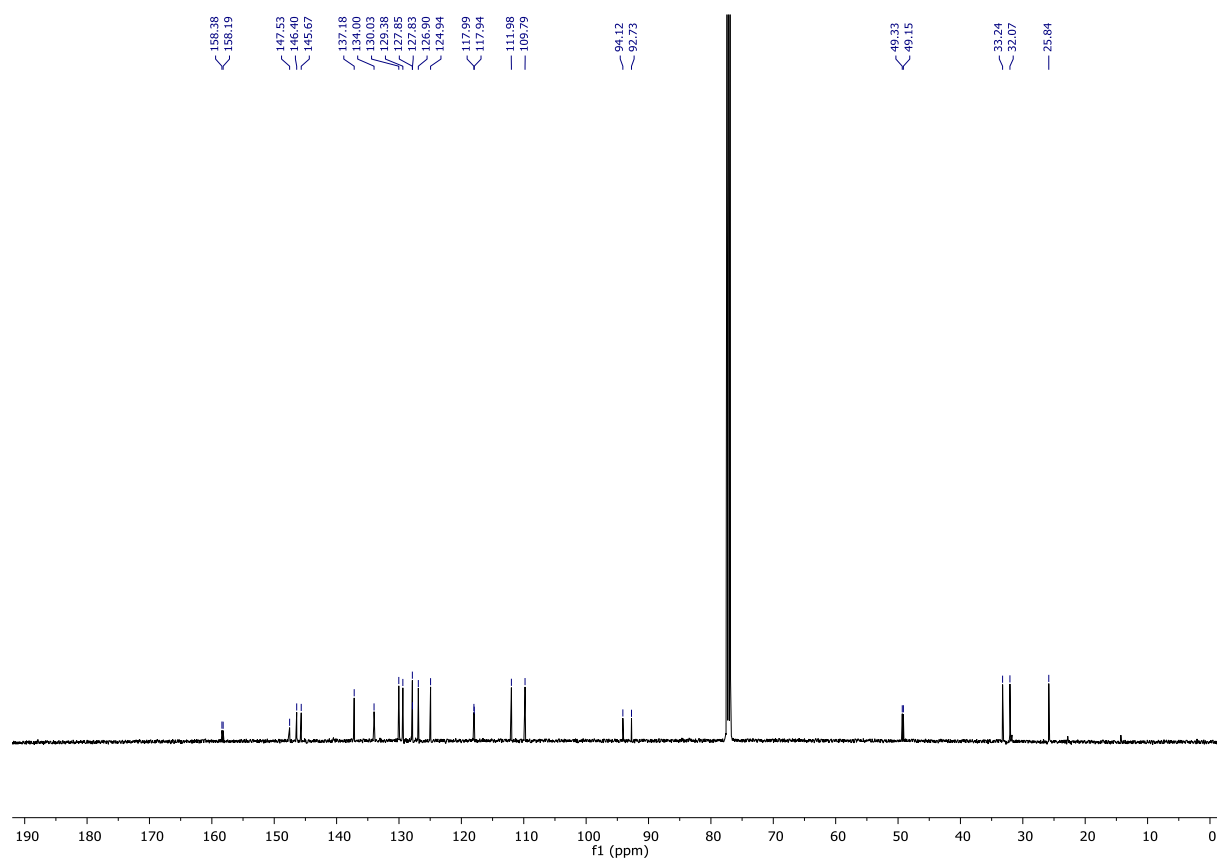

### <sup>19</sup>F NMR of 7c

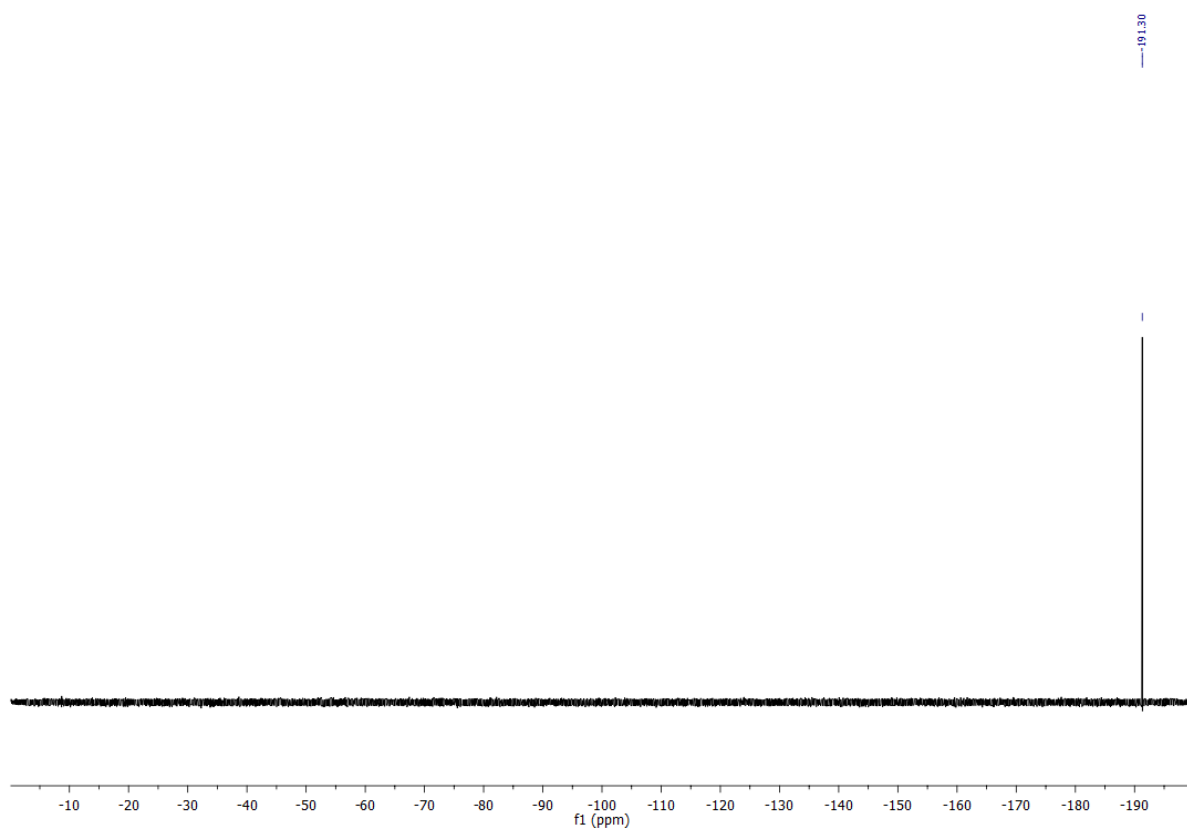

### <sup>1</sup>H NMR of 7d

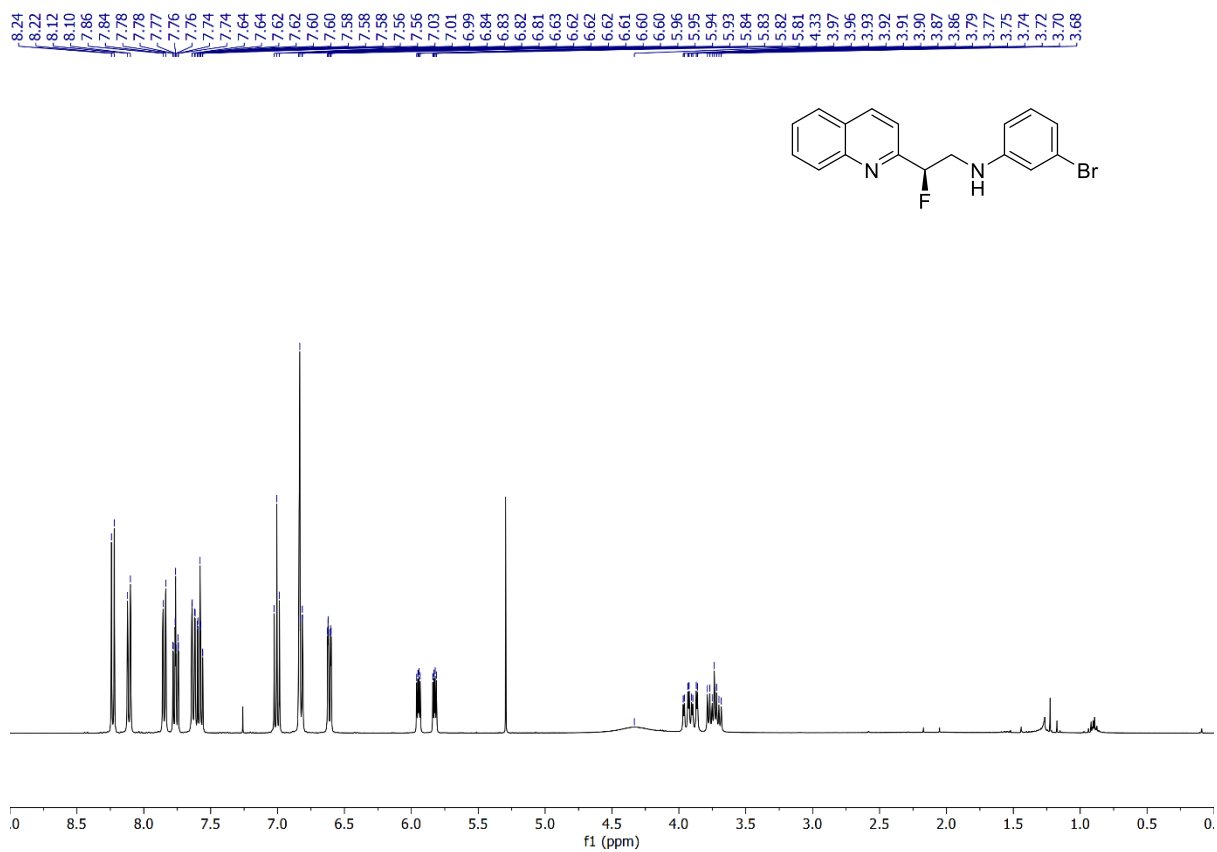

### <sup>13</sup>C NMR of 7d

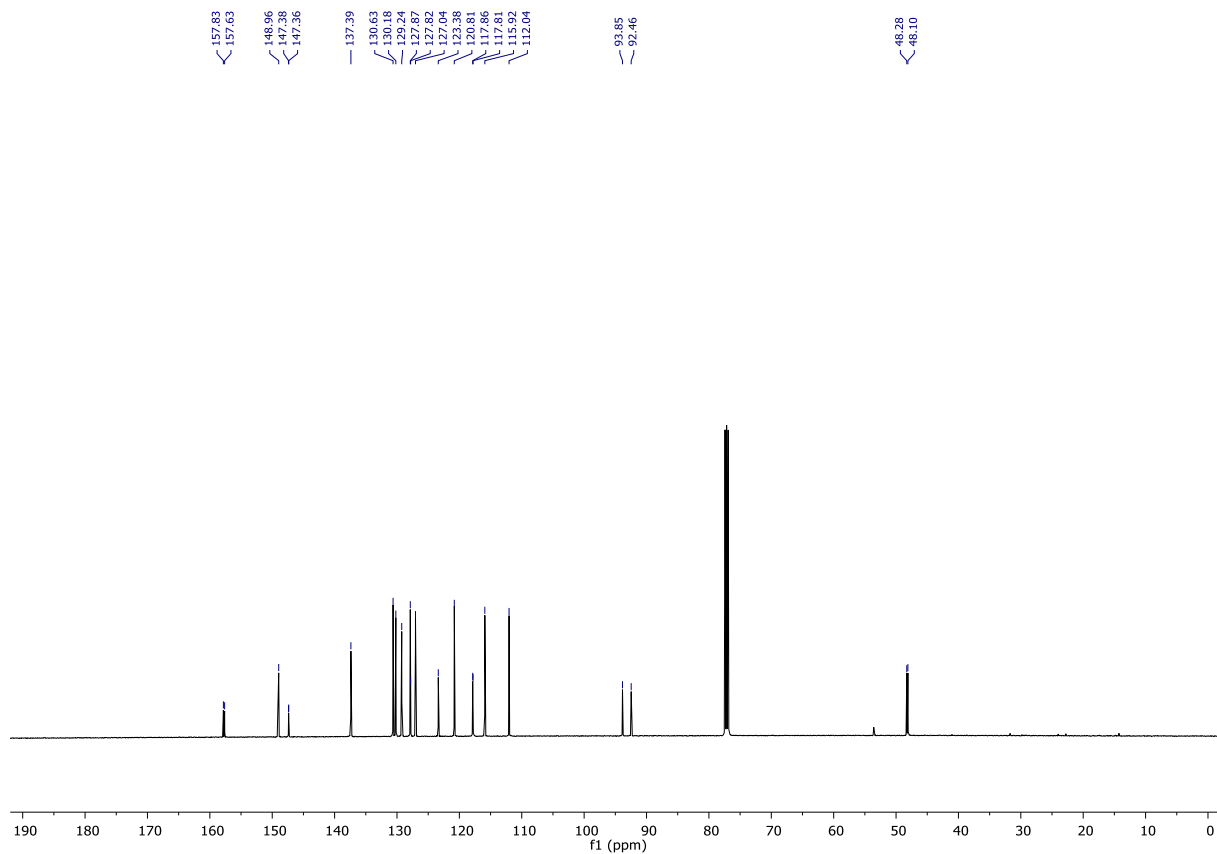

### <sup>19</sup>F NMR of 7d

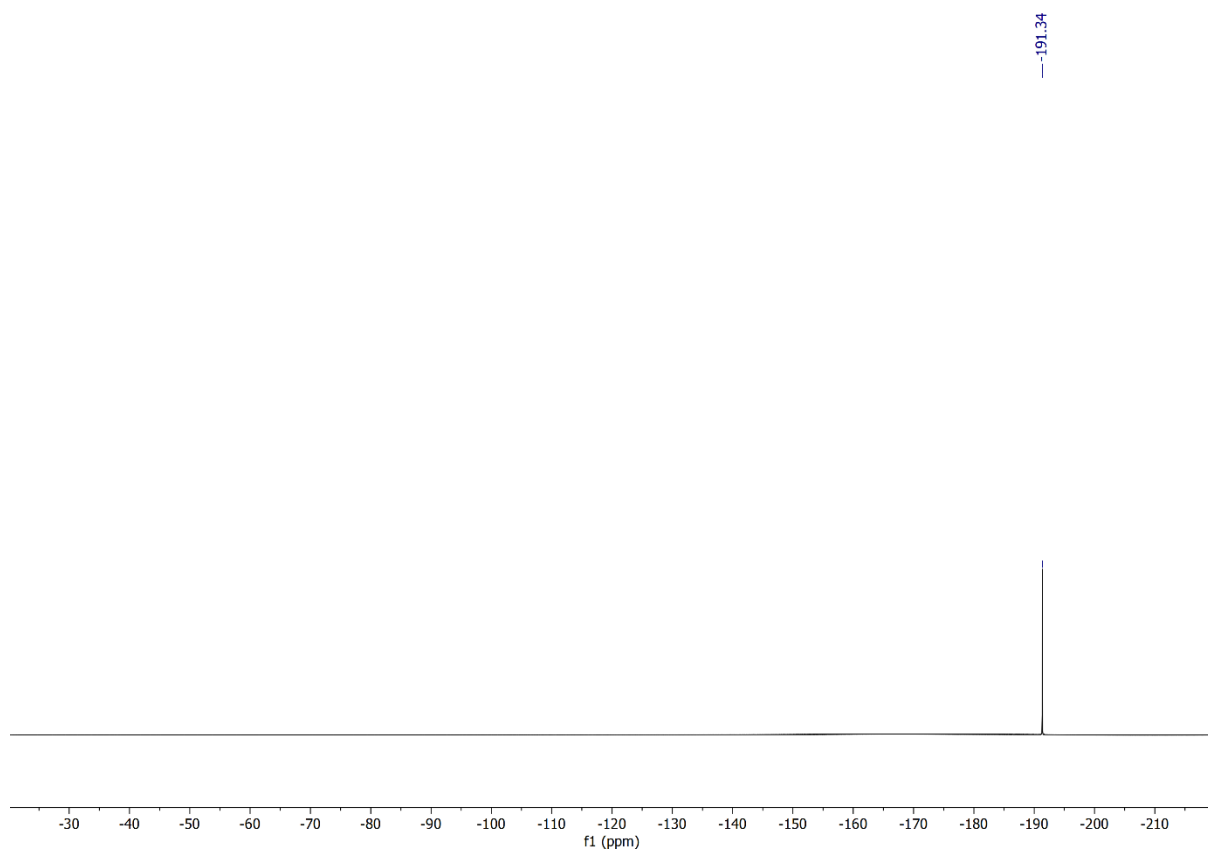

### <sup>1</sup>H NMR of 7e

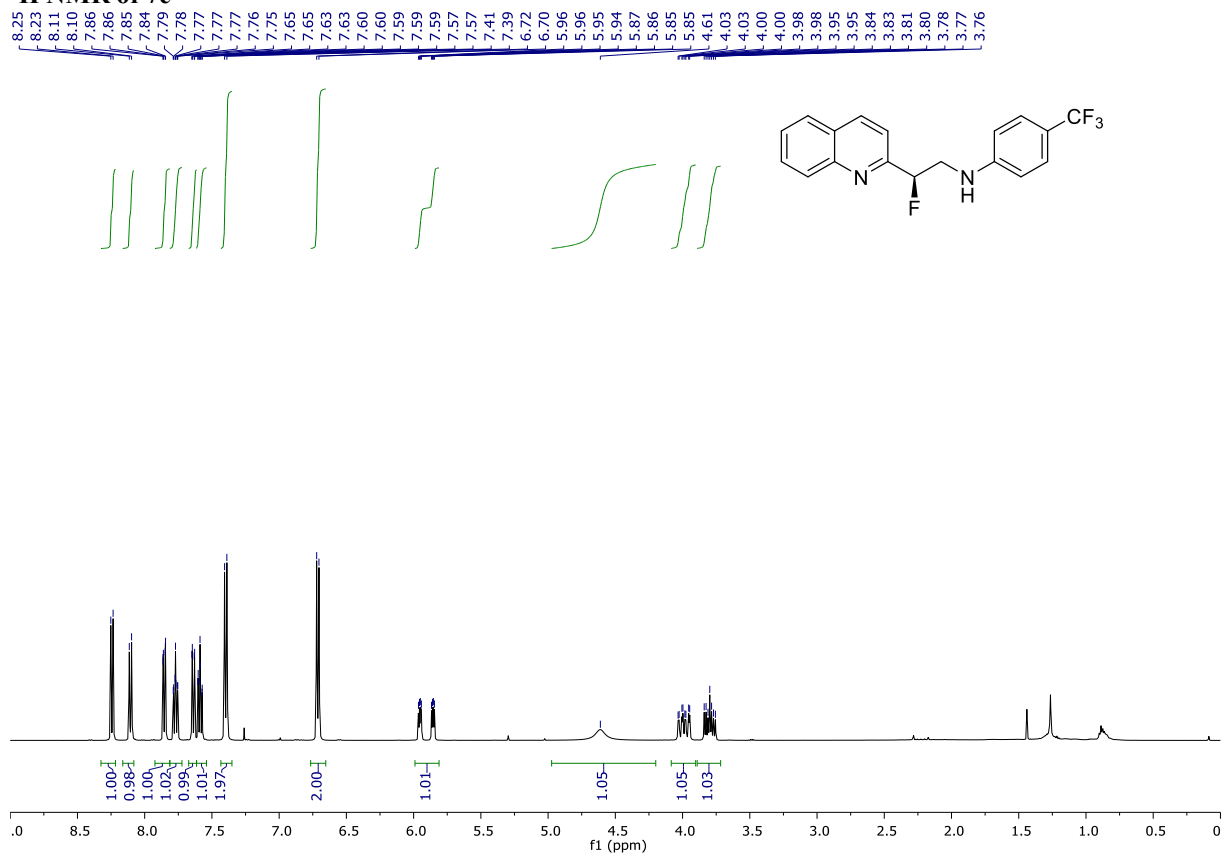



### <sup>13</sup>C NMR of 7e

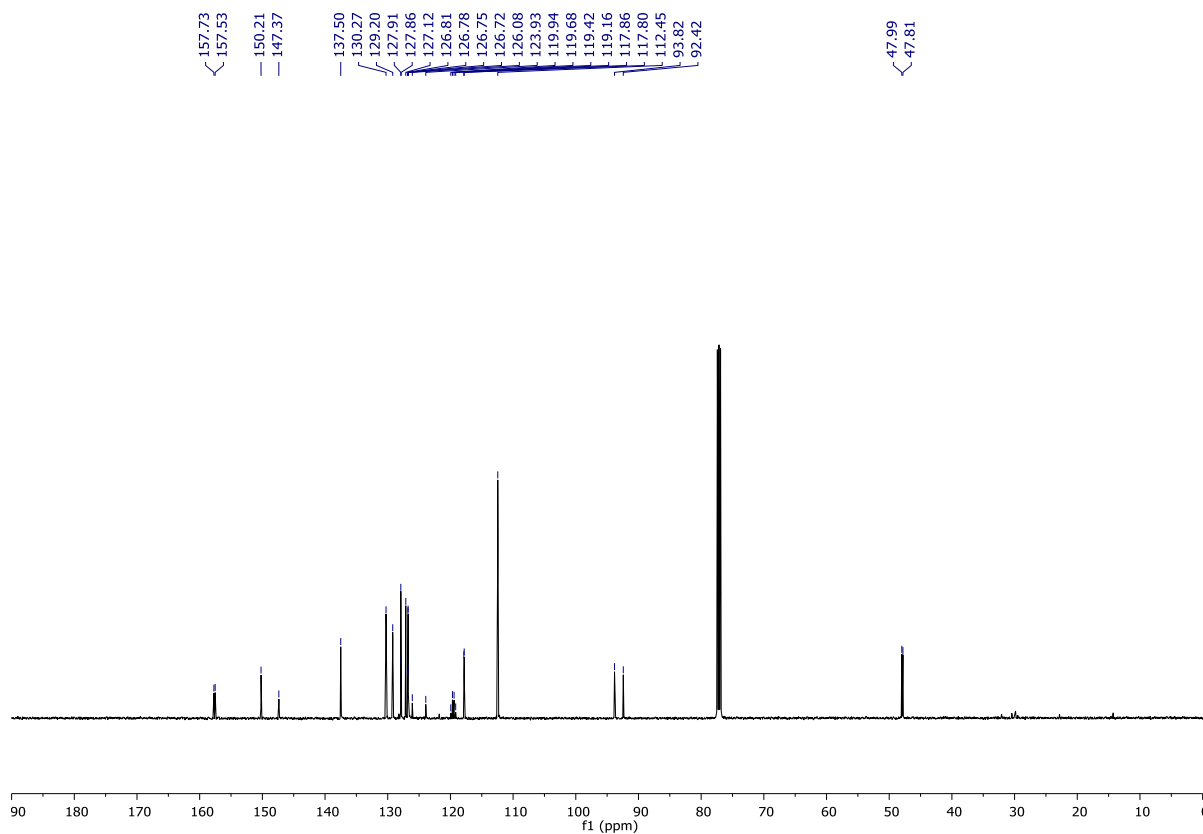

### <sup>19</sup>F NMR of 7e

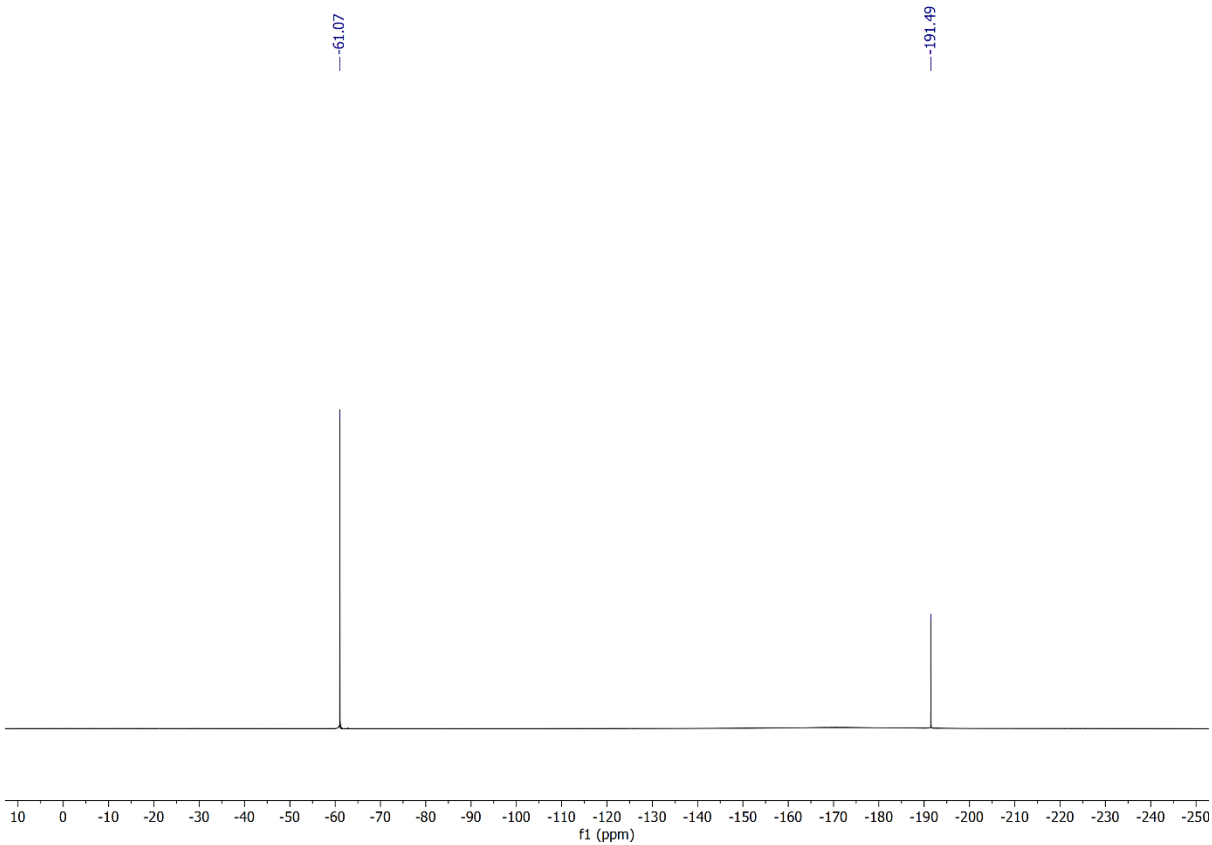

### <sup>1</sup>H NMR of 7f

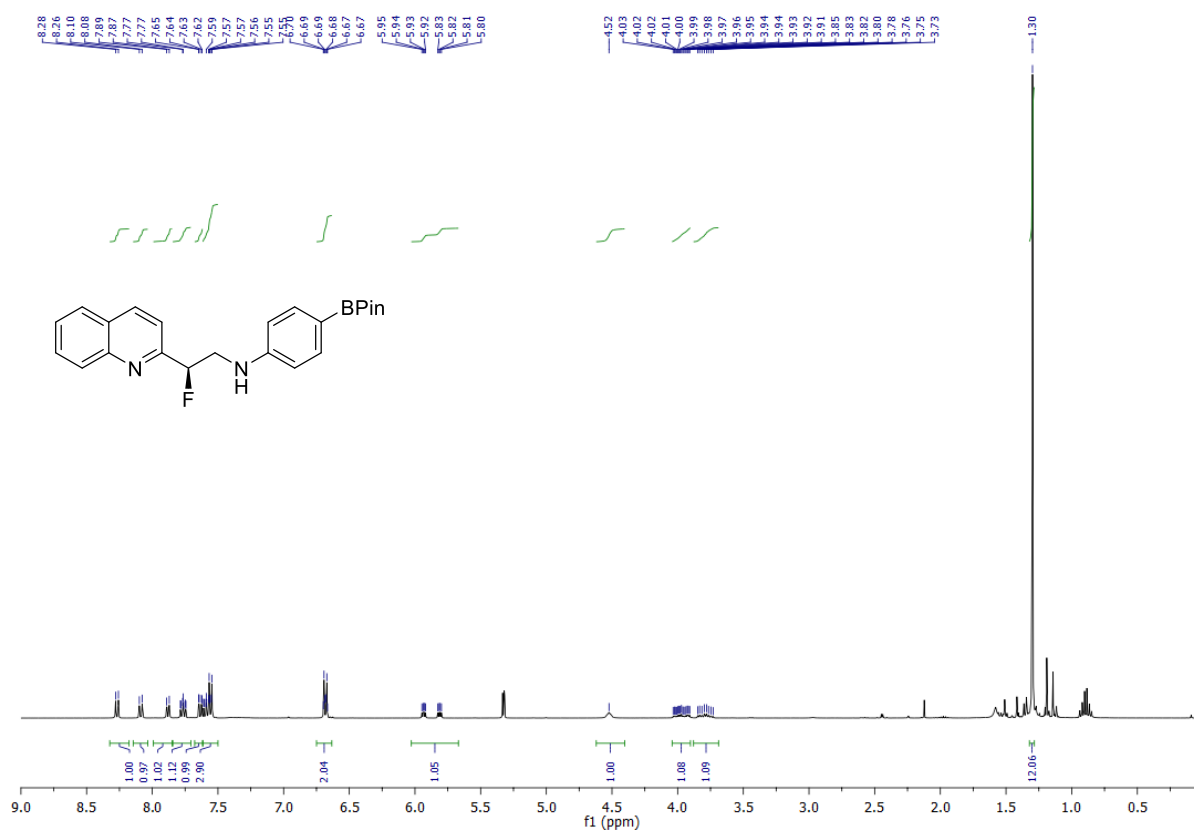

### <sup>13</sup>C NMR of 7f

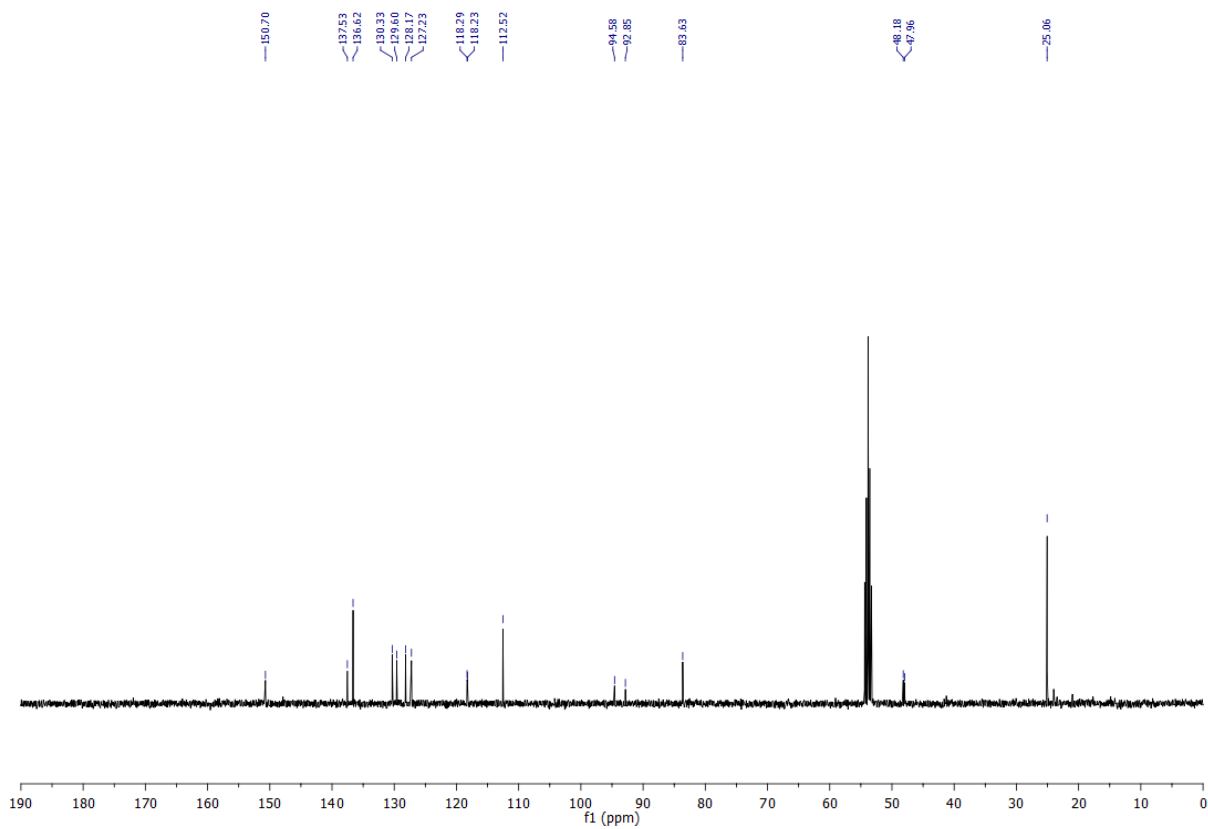

**$^{19}\text{F}$  NMR of 7f**

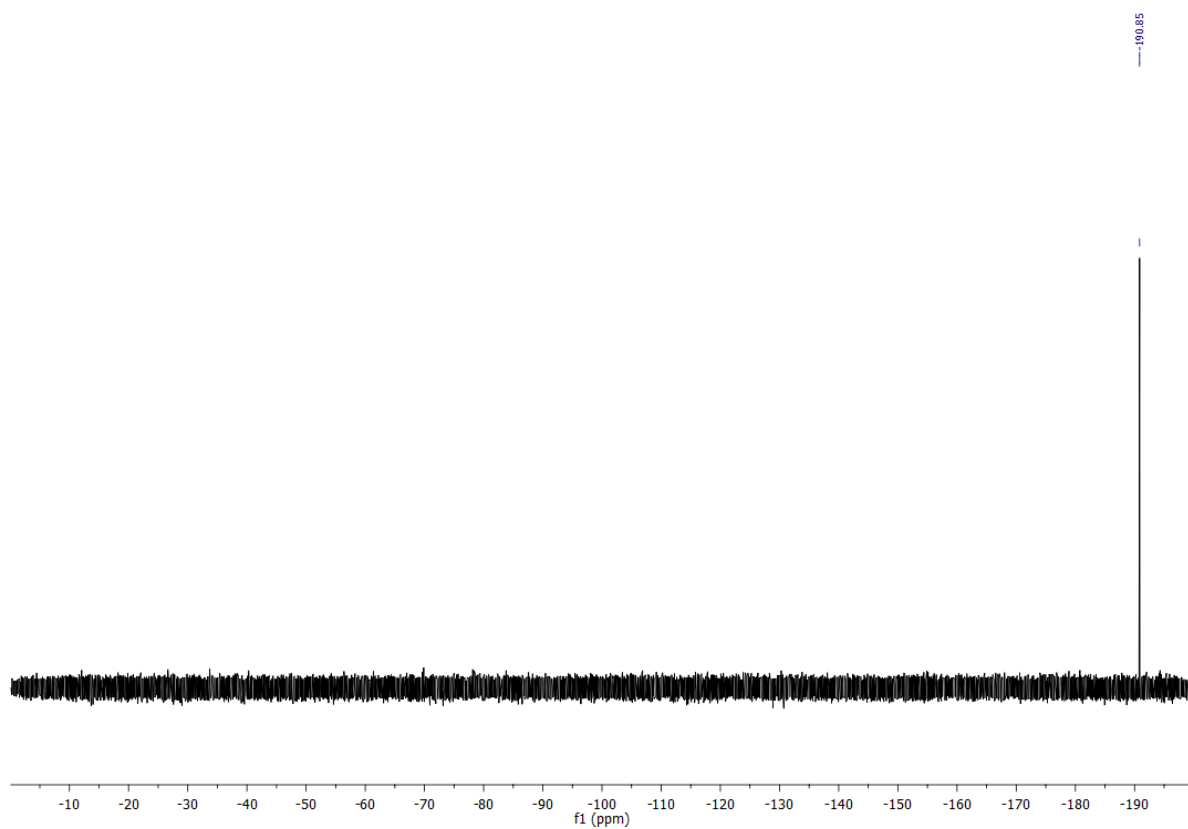

**$^{11}\text{B}$  NMR of 7f**

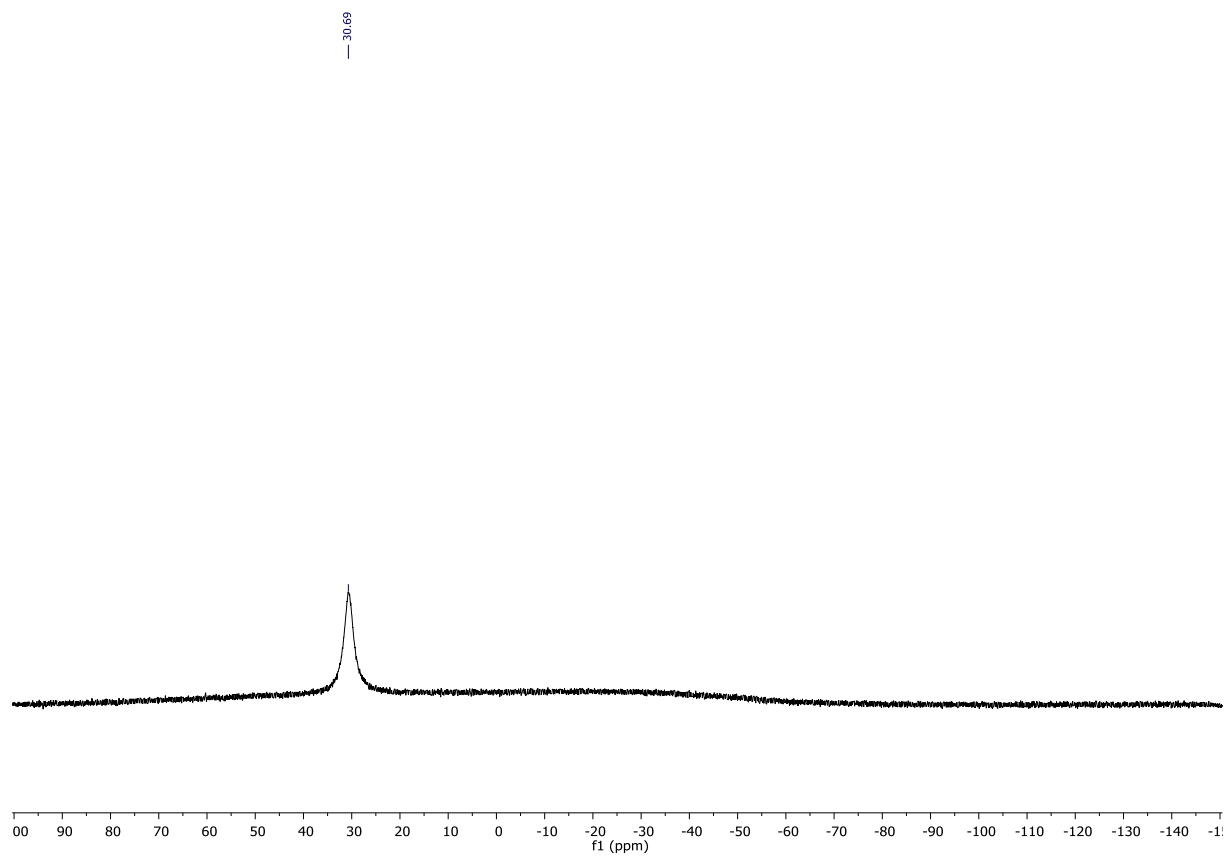

### <sup>1</sup>H NMR of 7g

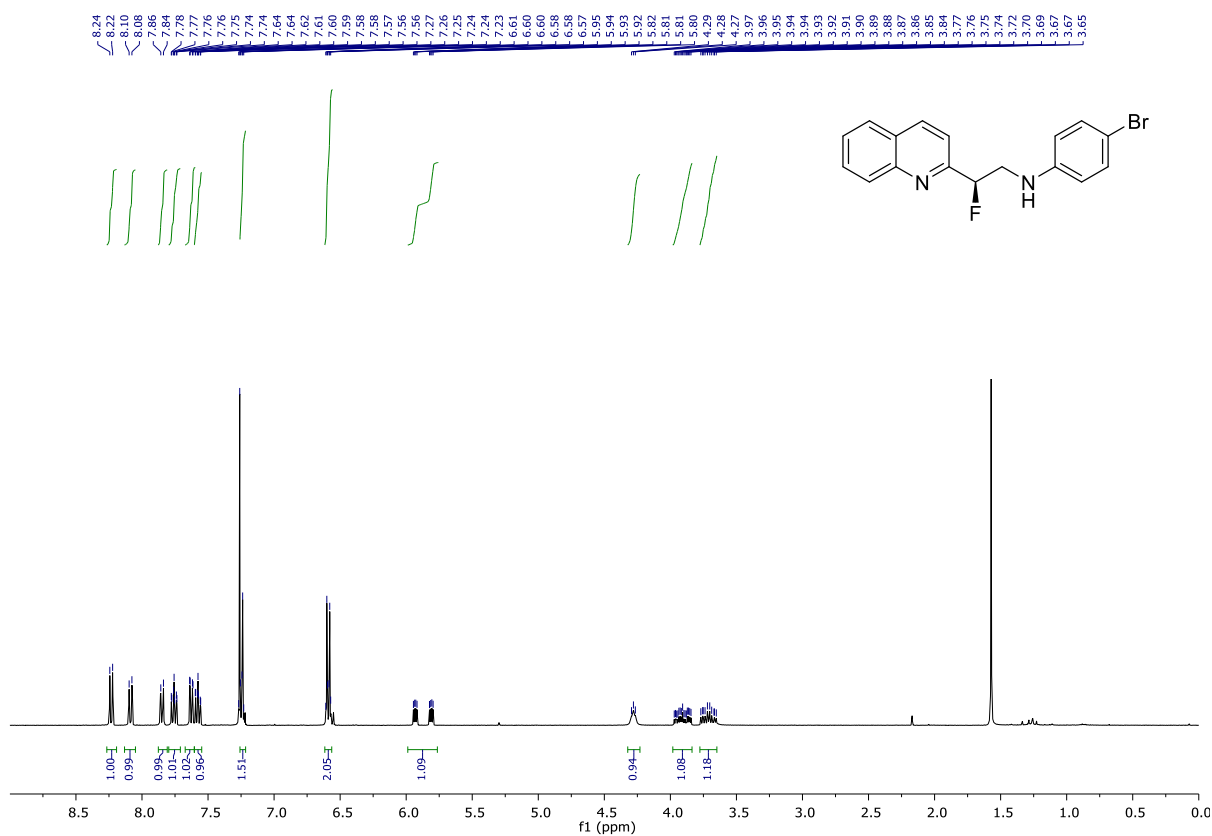

### <sup>13</sup>C NMR of 7g

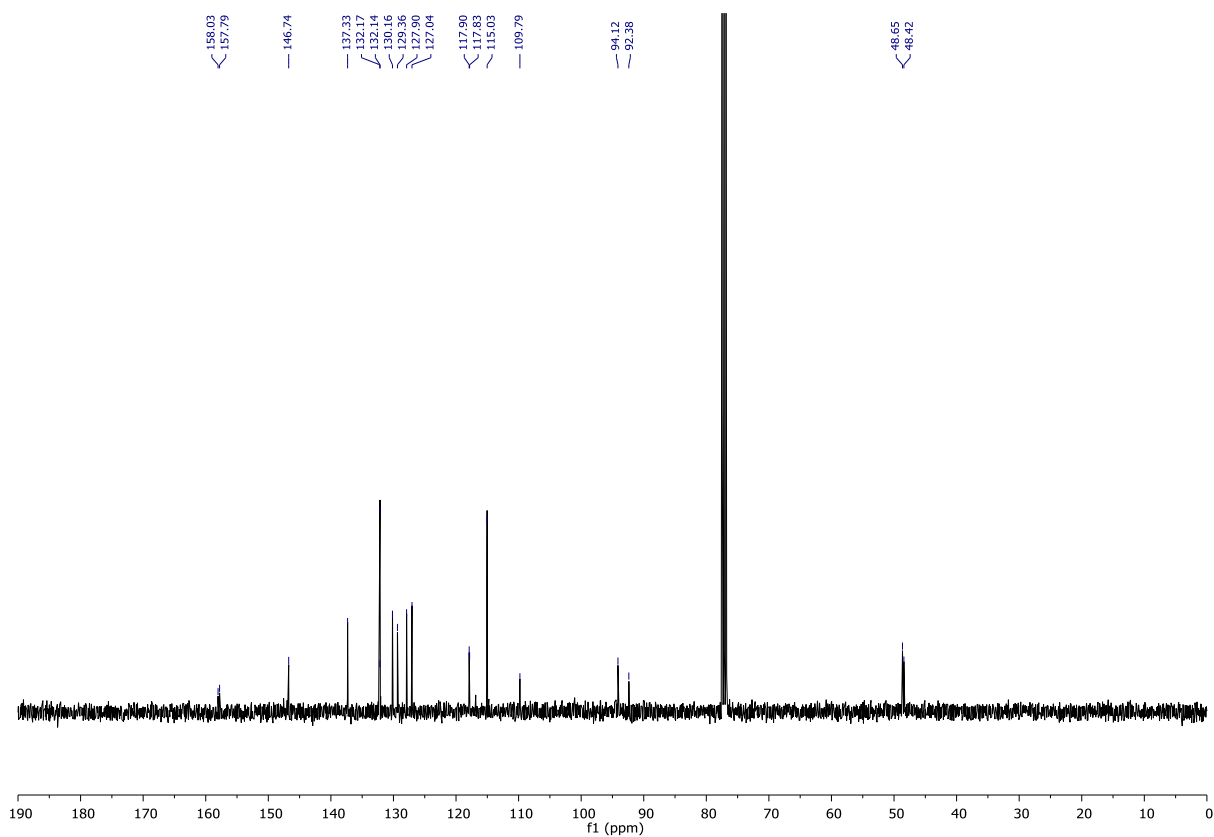

# <sup>19</sup>F NMR of 7g

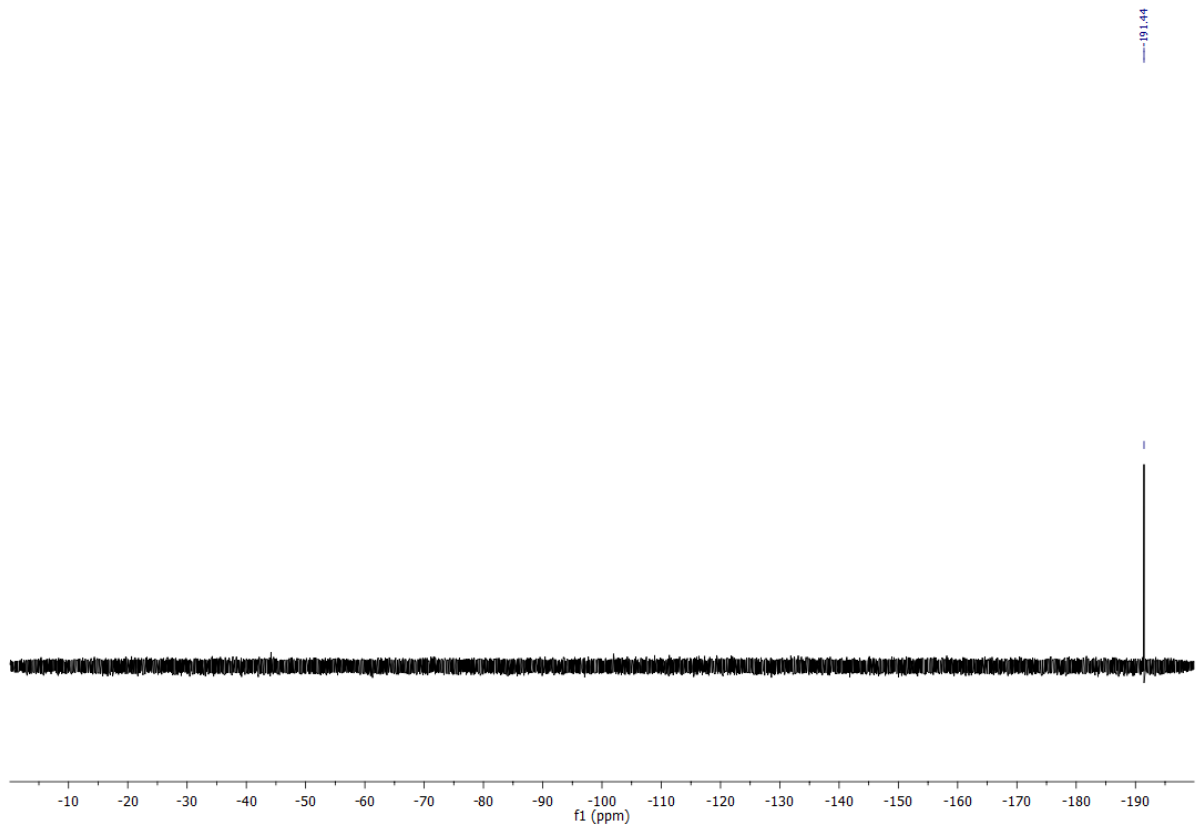

# <sup>1</sup>H NMR of 7h

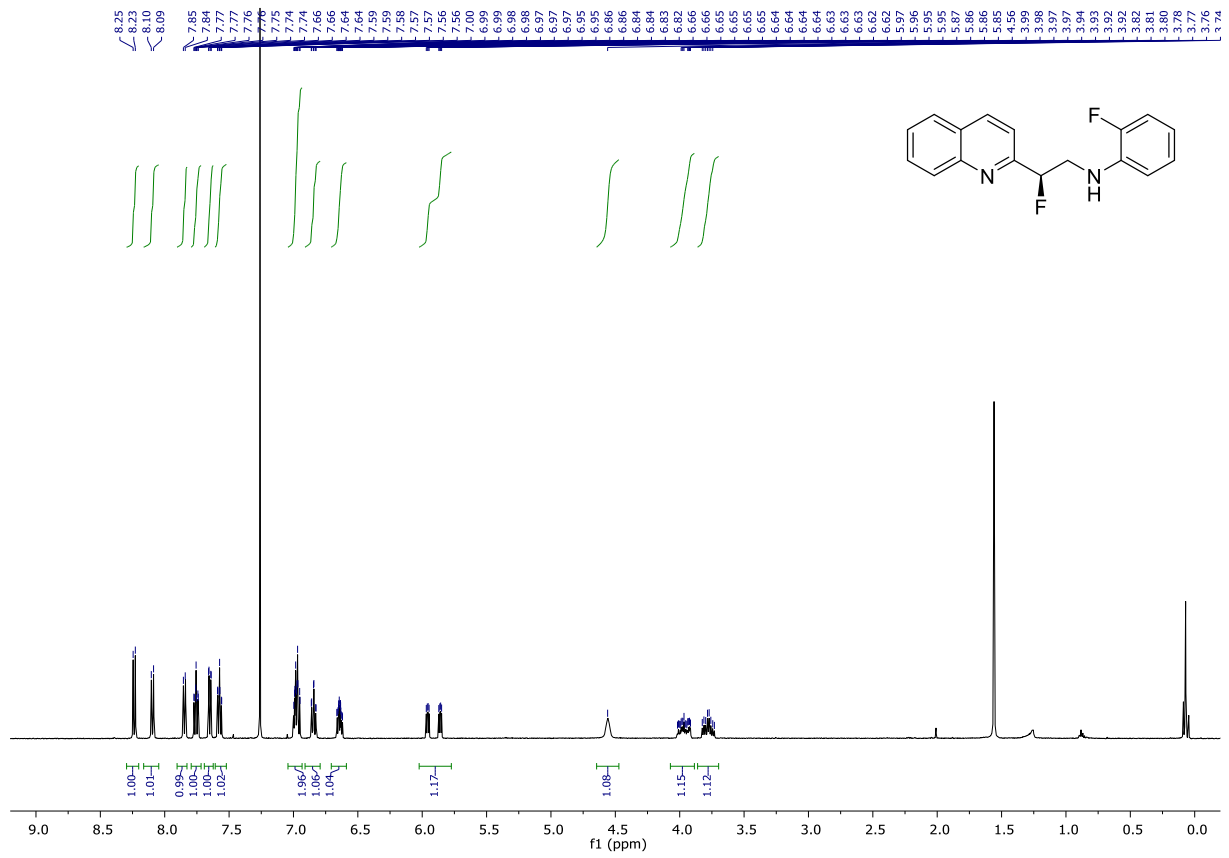

### <sup>13</sup>C NMR of 7h

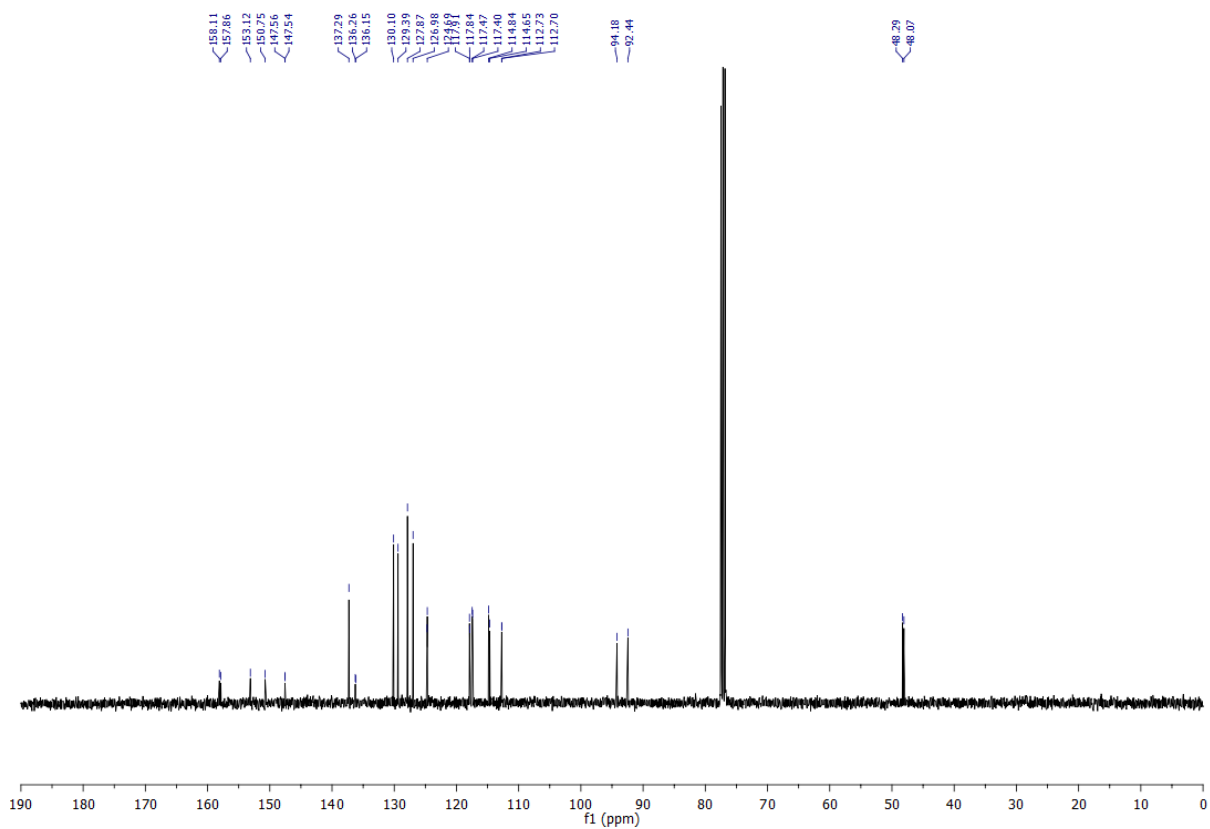

### <sup>19</sup>F NMR of 7h

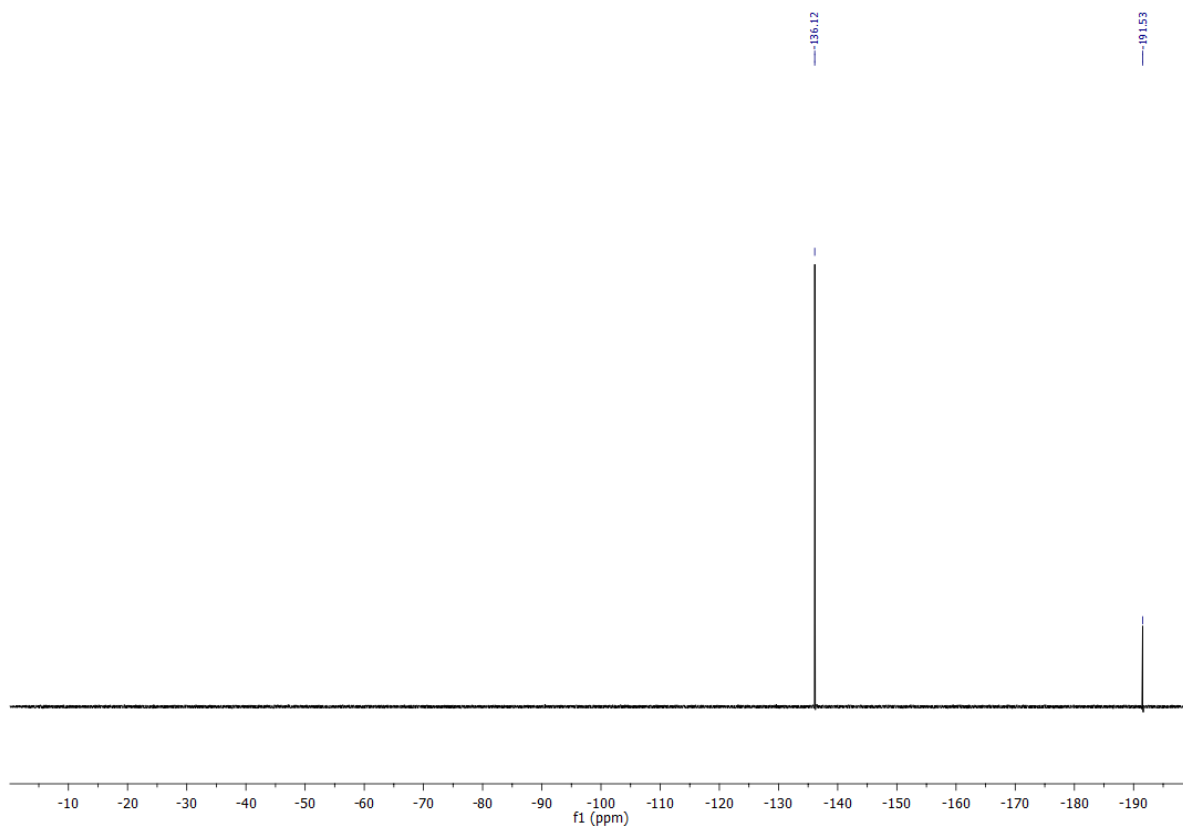

### <sup>1</sup>H NMR of 7i

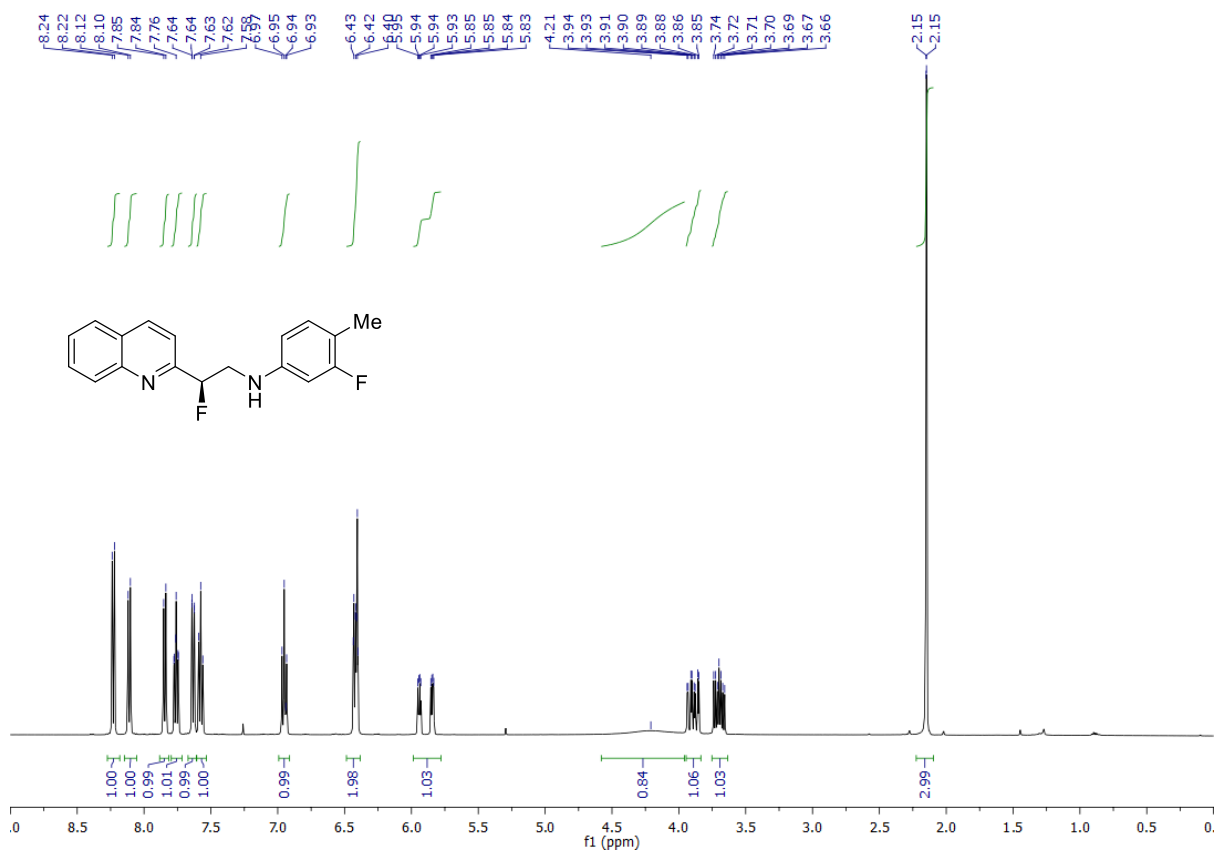

### <sup>13</sup>C NMR of 7i

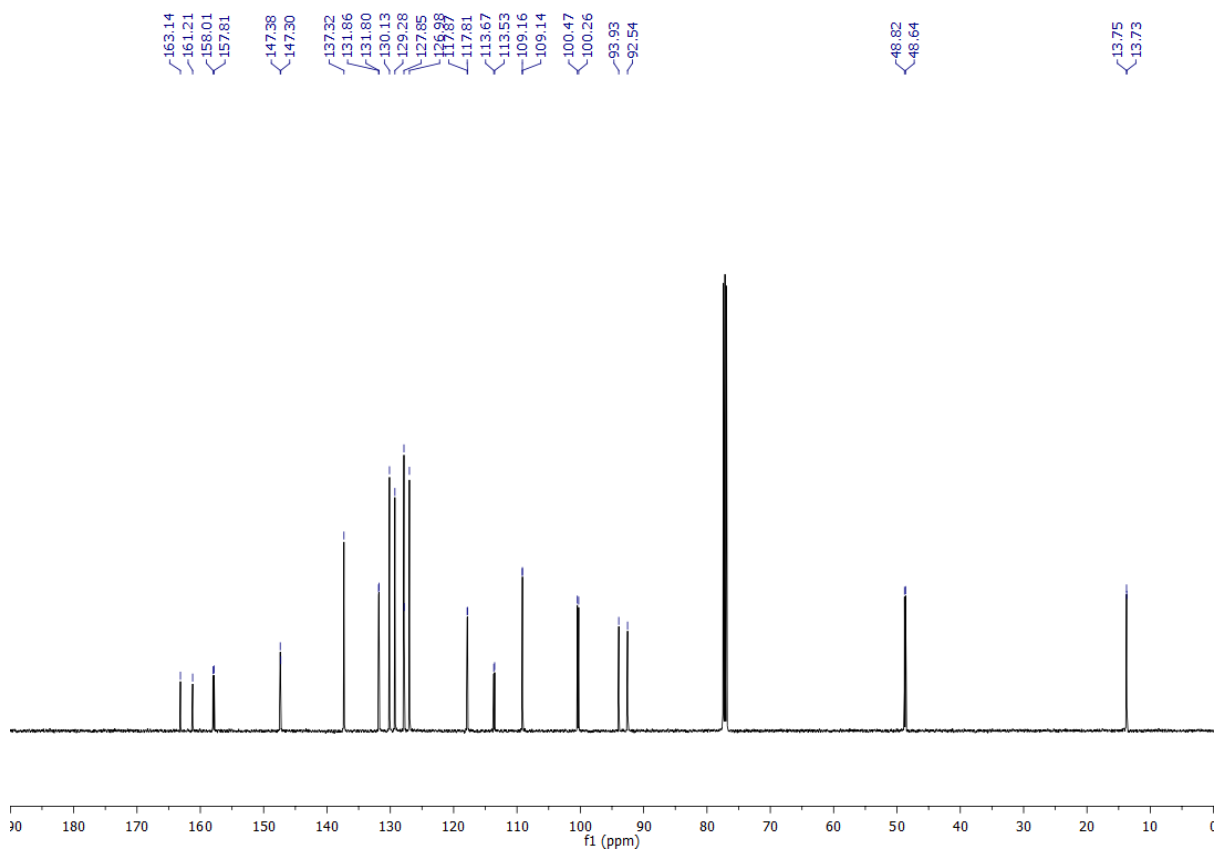

### $^{19}\text{F}$ NMR of 7i

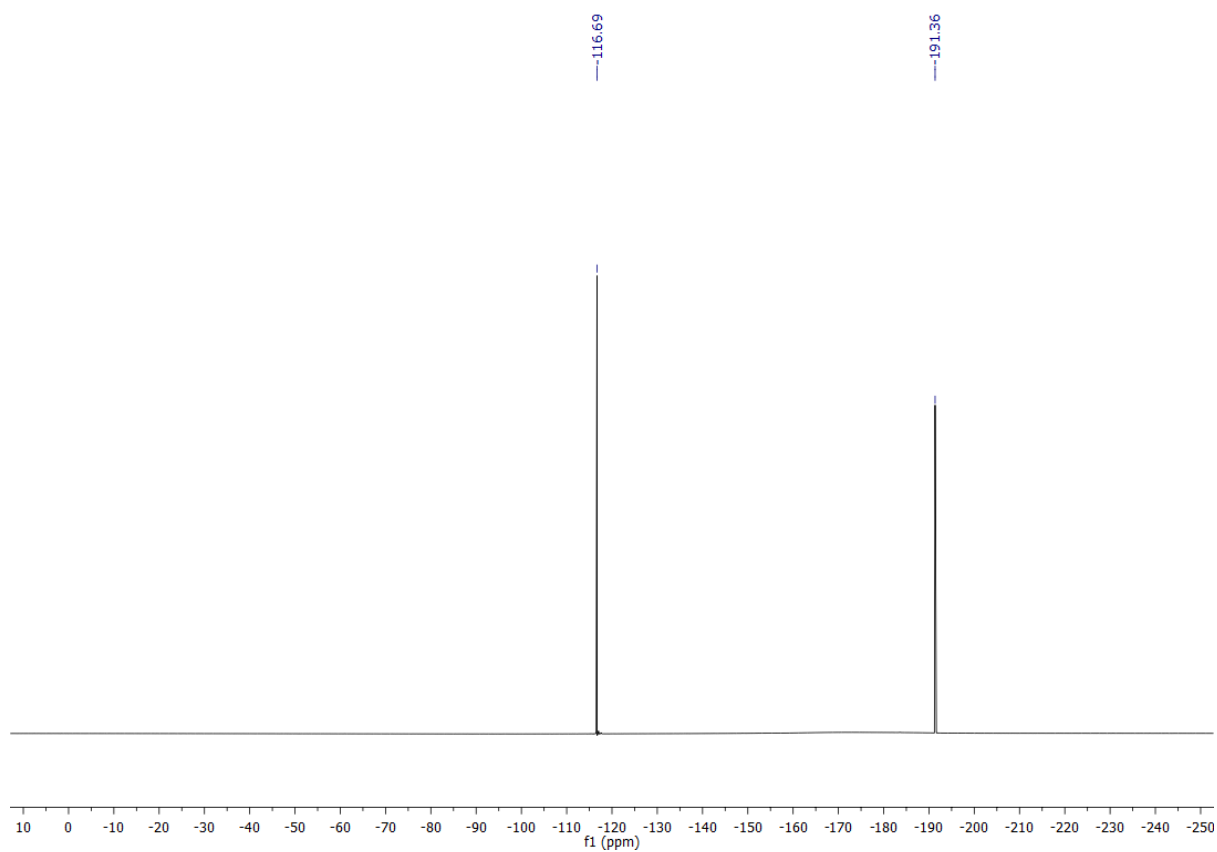

### $^1\text{H}$ NMR of 7j

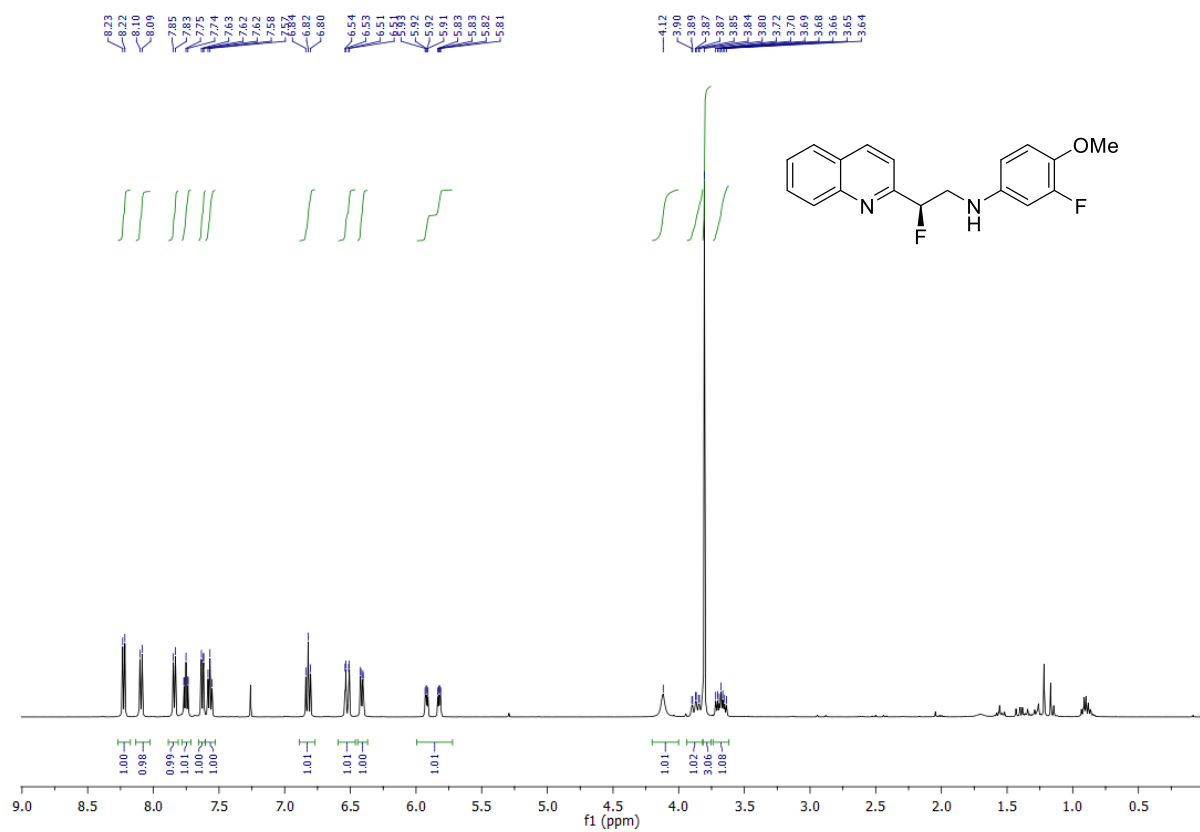



### <sup>13</sup>C NMR of 7j

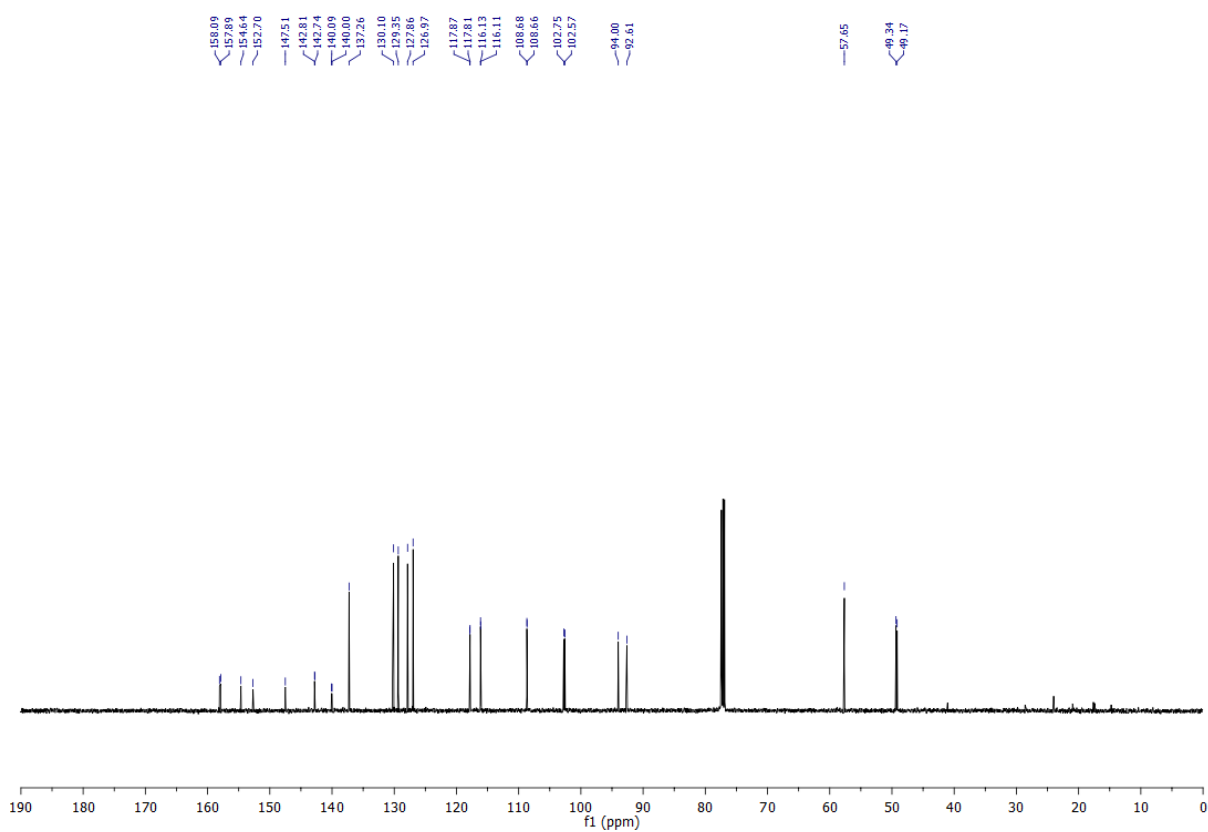

### <sup>19</sup>F NMR of 7j

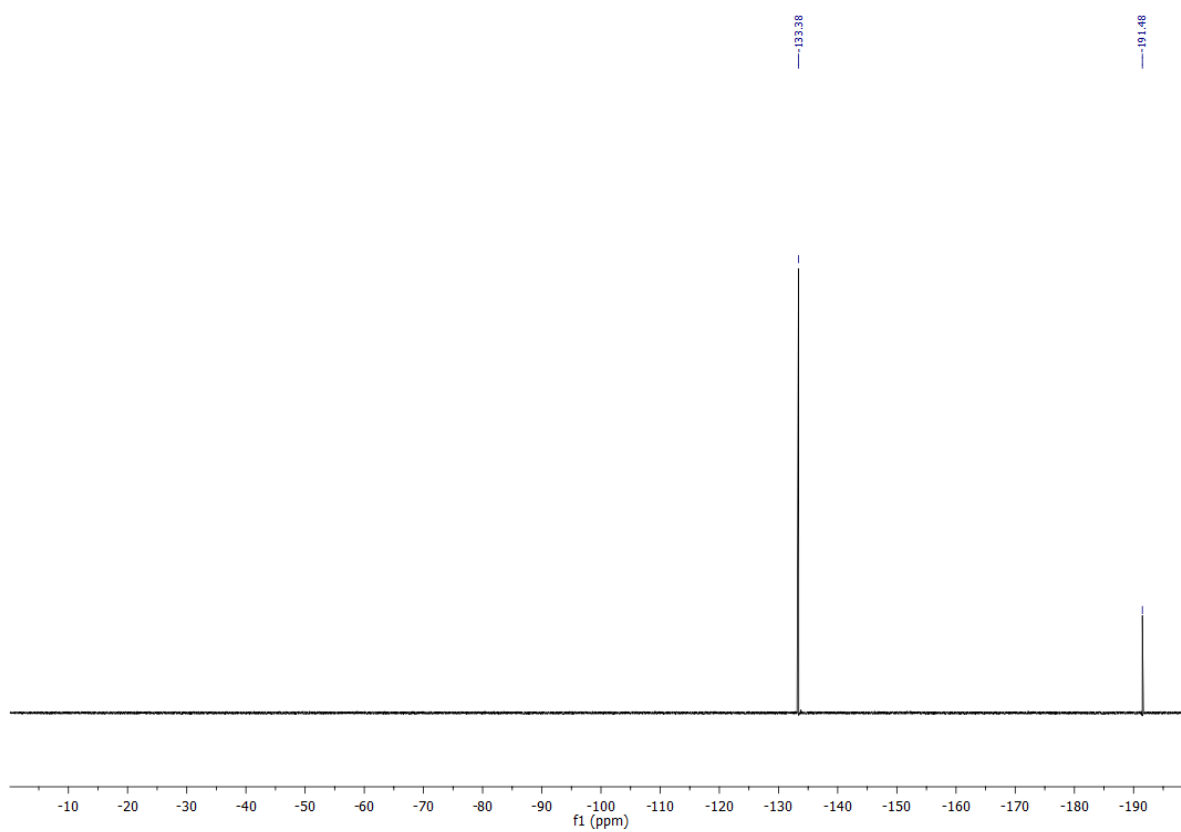

### <sup>1</sup>H NMR of 7k

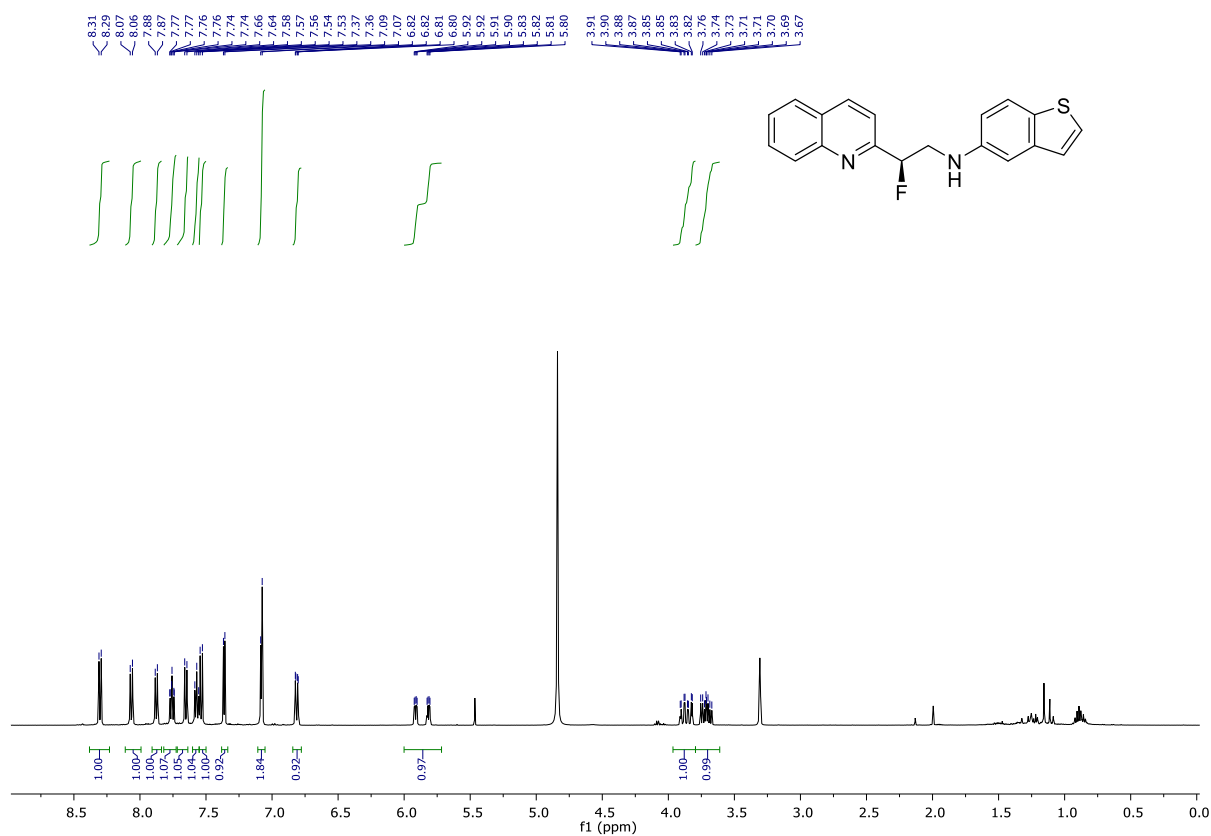

### <sup>13</sup>C NMR of 7k

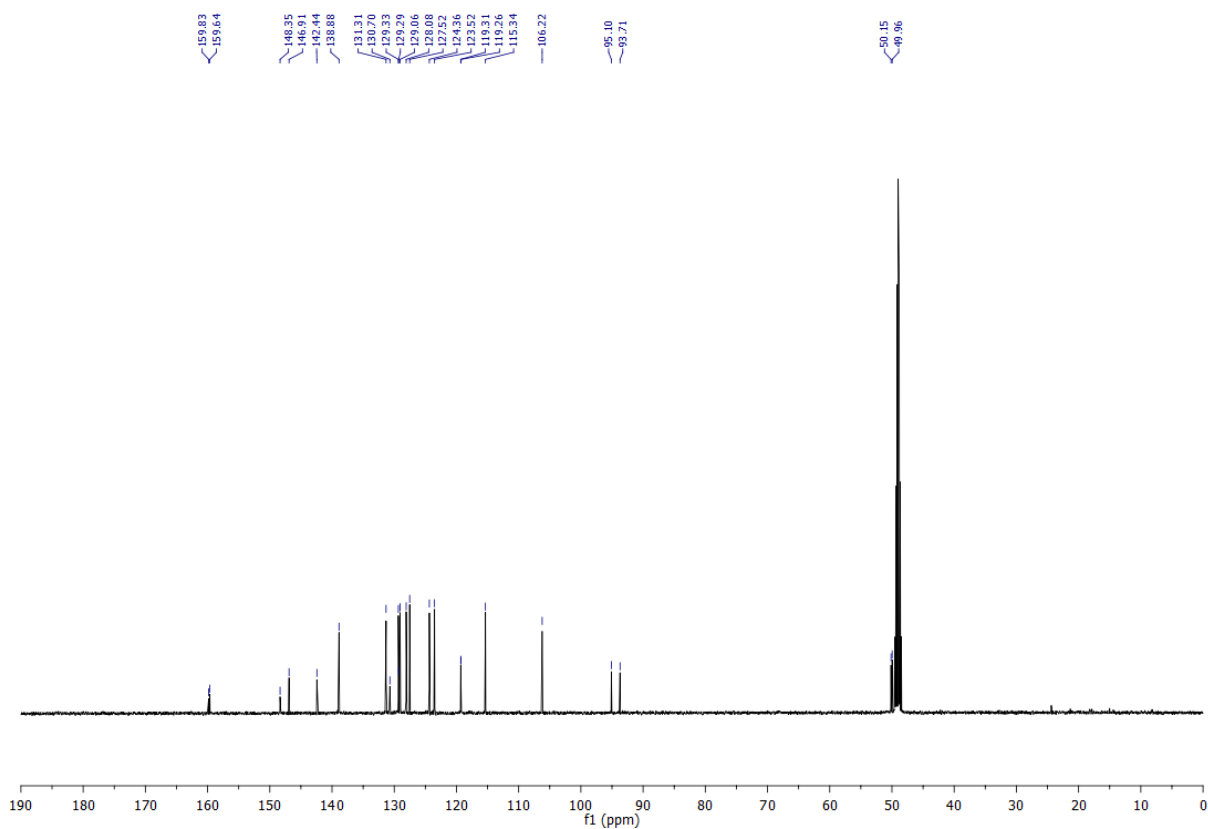

# <sup>19</sup>F NMR of 7k

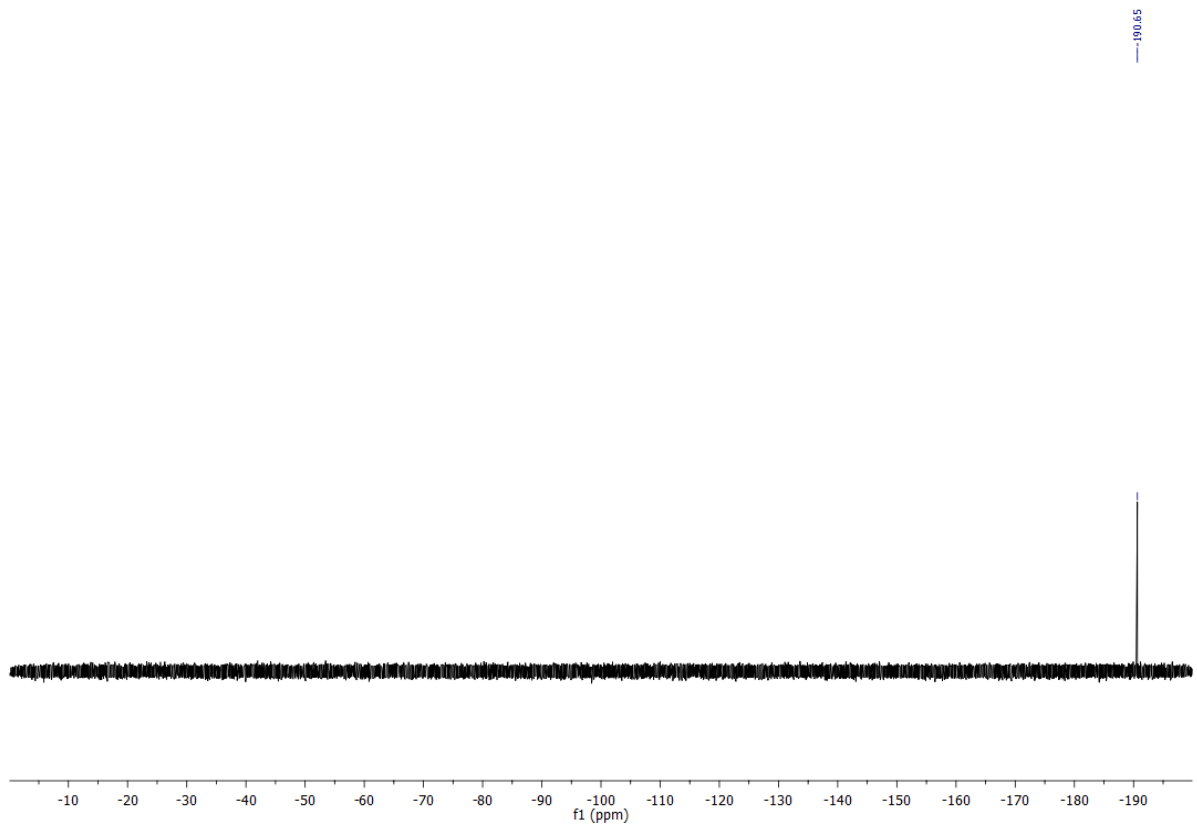

# <sup>1</sup>H NMR of 7l

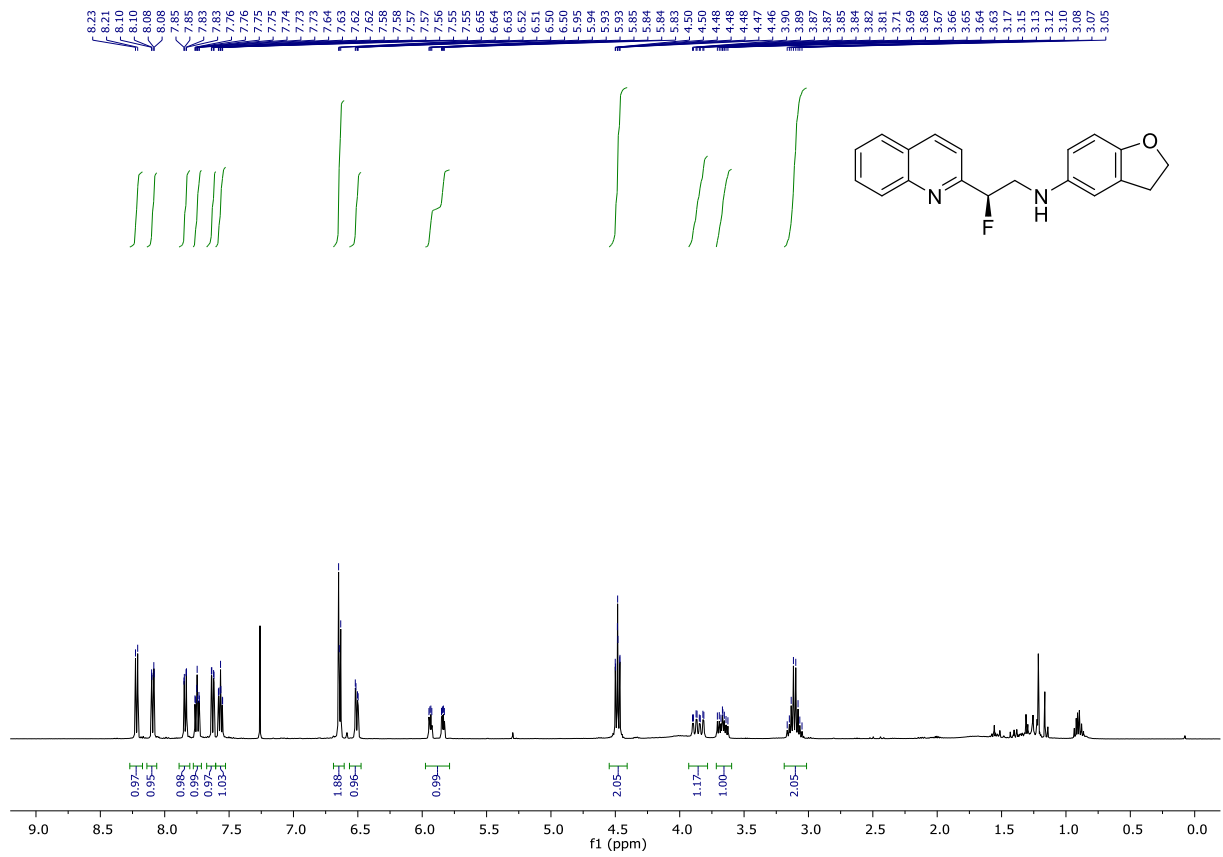

### <sup>13</sup>C NMR of 7l

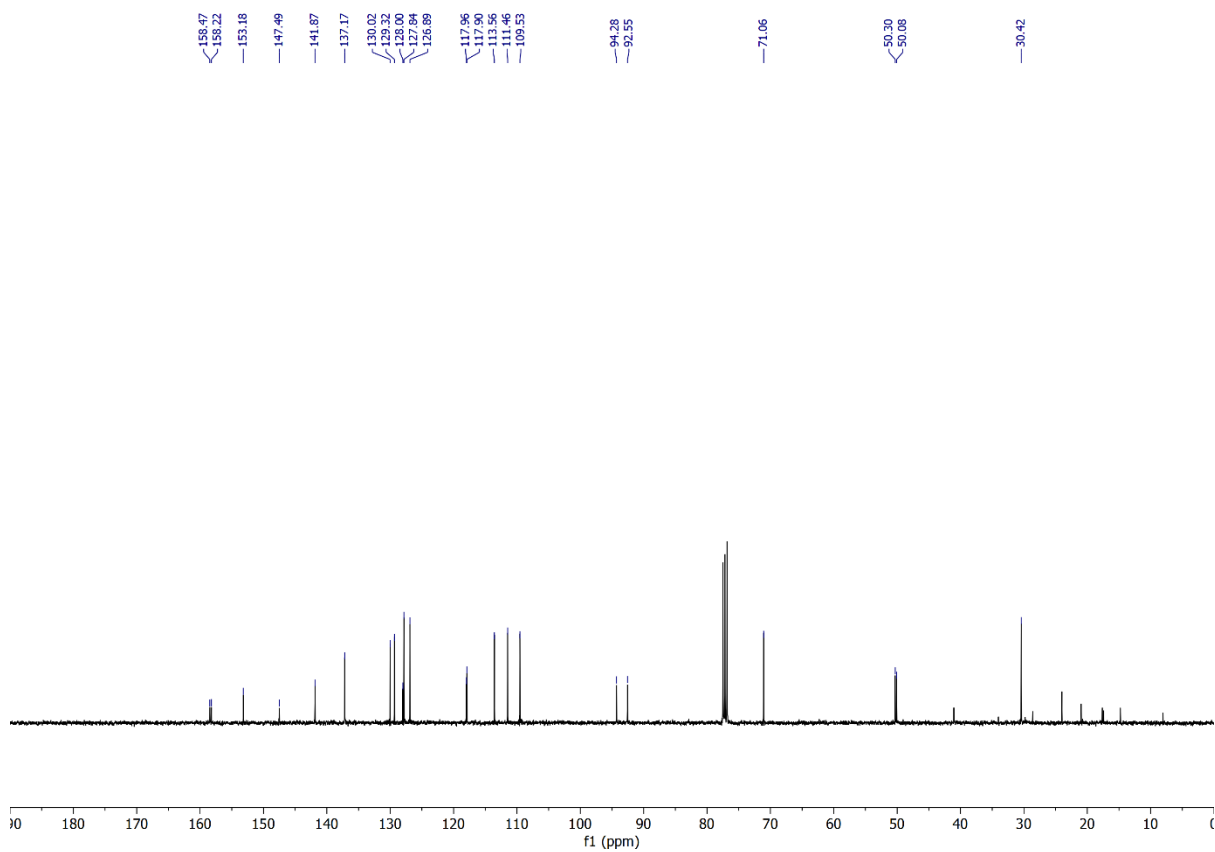

### <sup>19</sup>F NMR of 7l

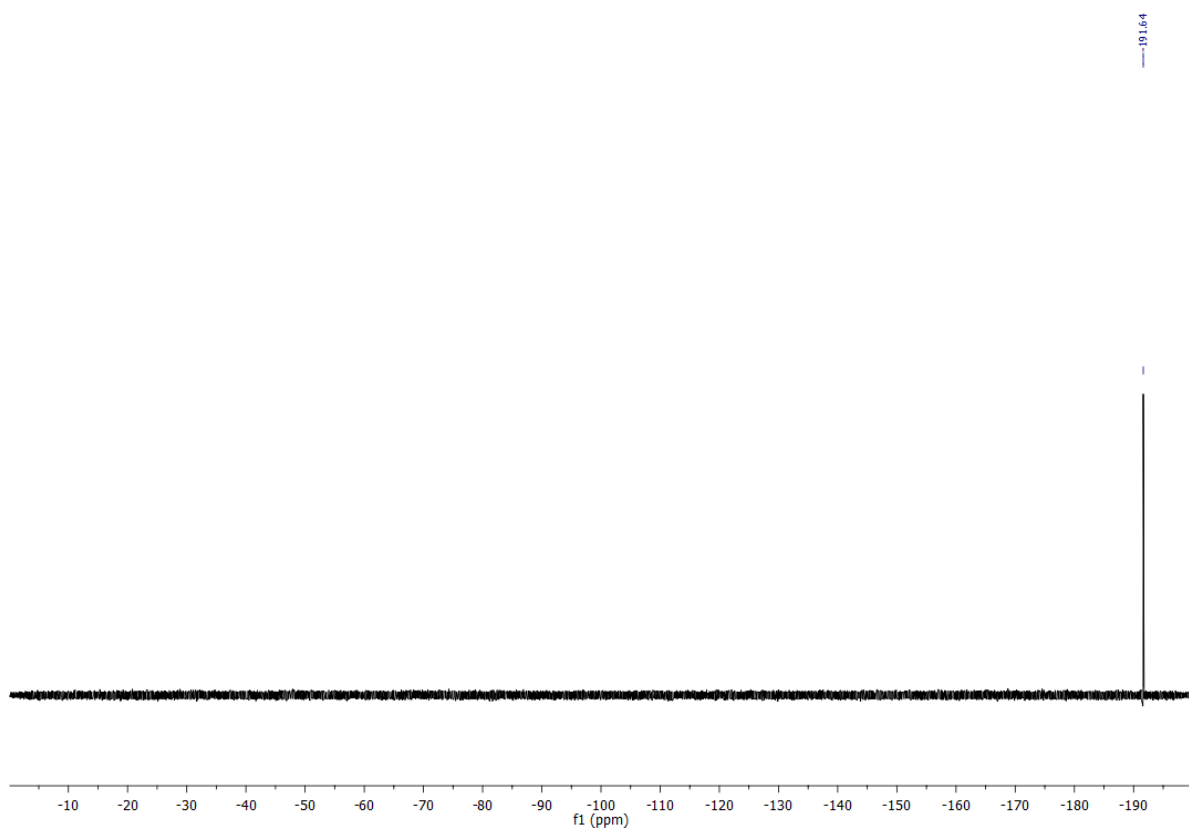

### <sup>1</sup>H NMR of 7m

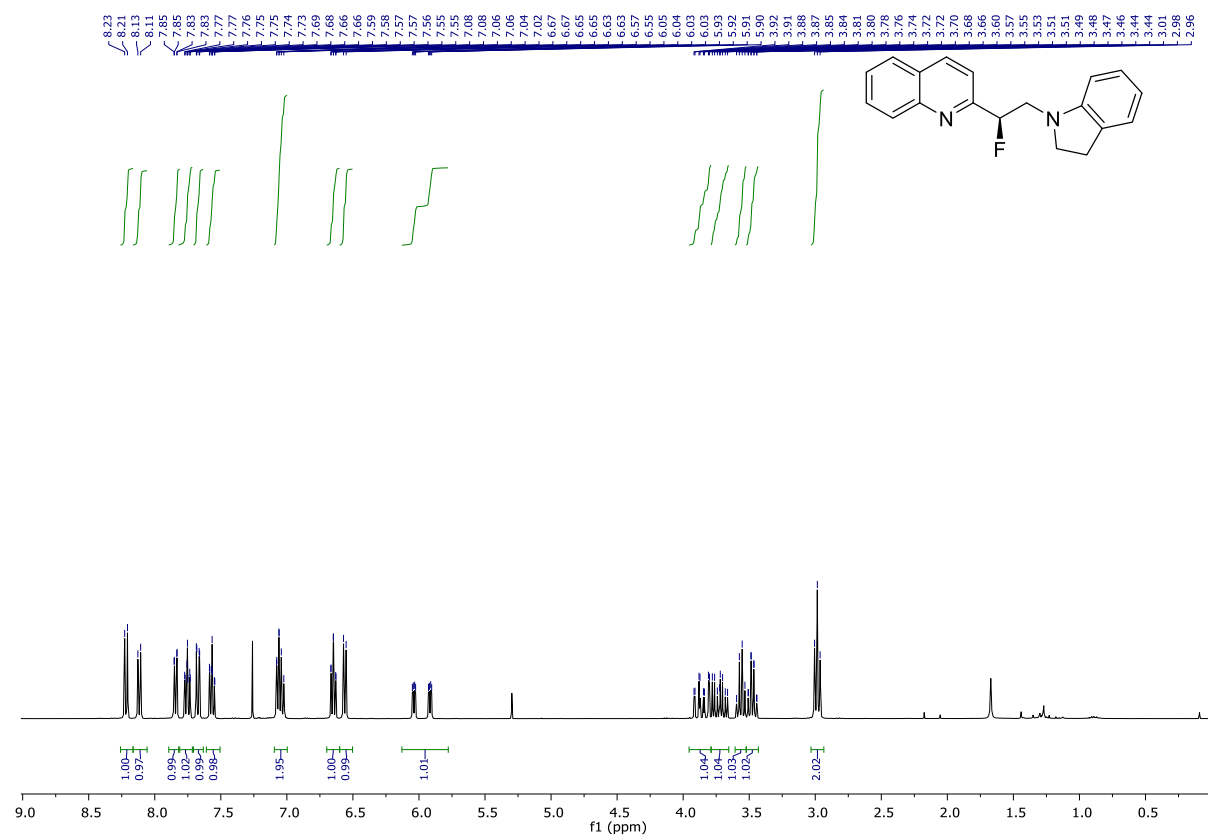

### <sup>13</sup>C NMR of 7m

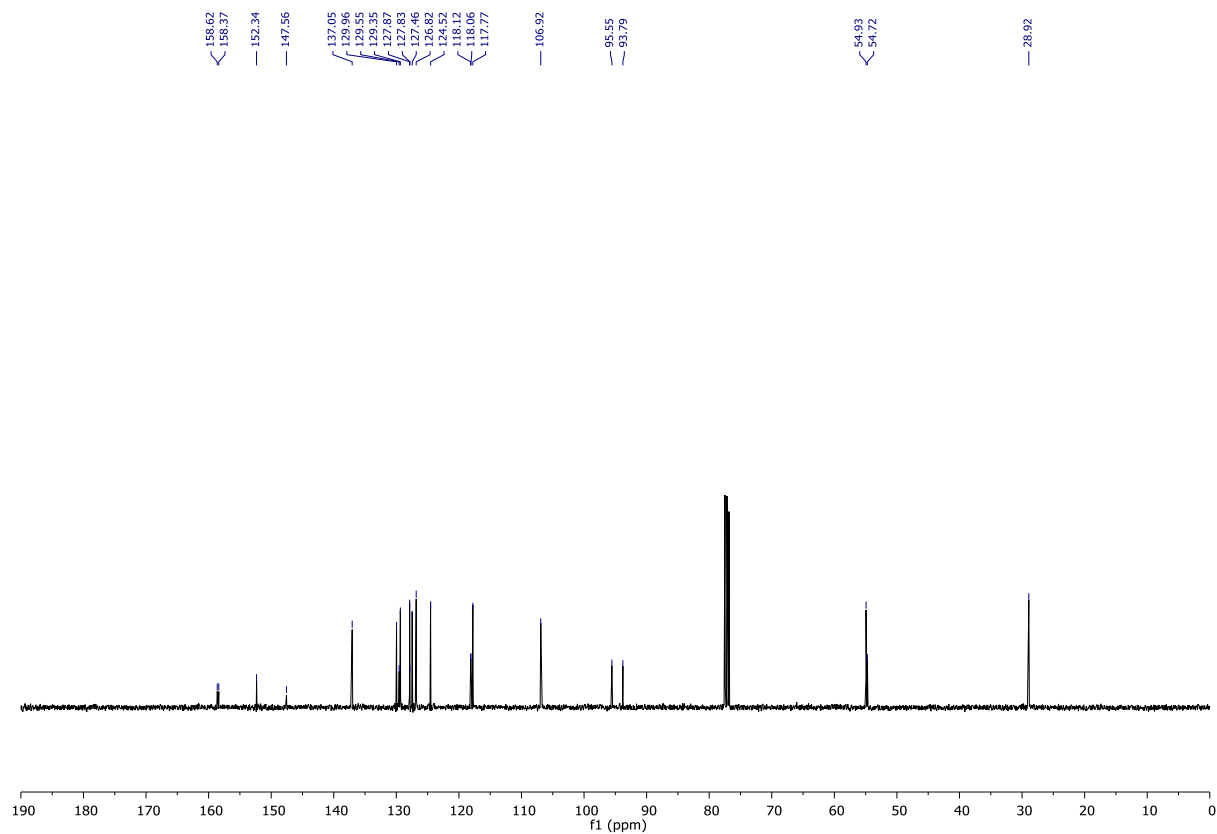

### $^{19}\text{F}$ NMR of 7m

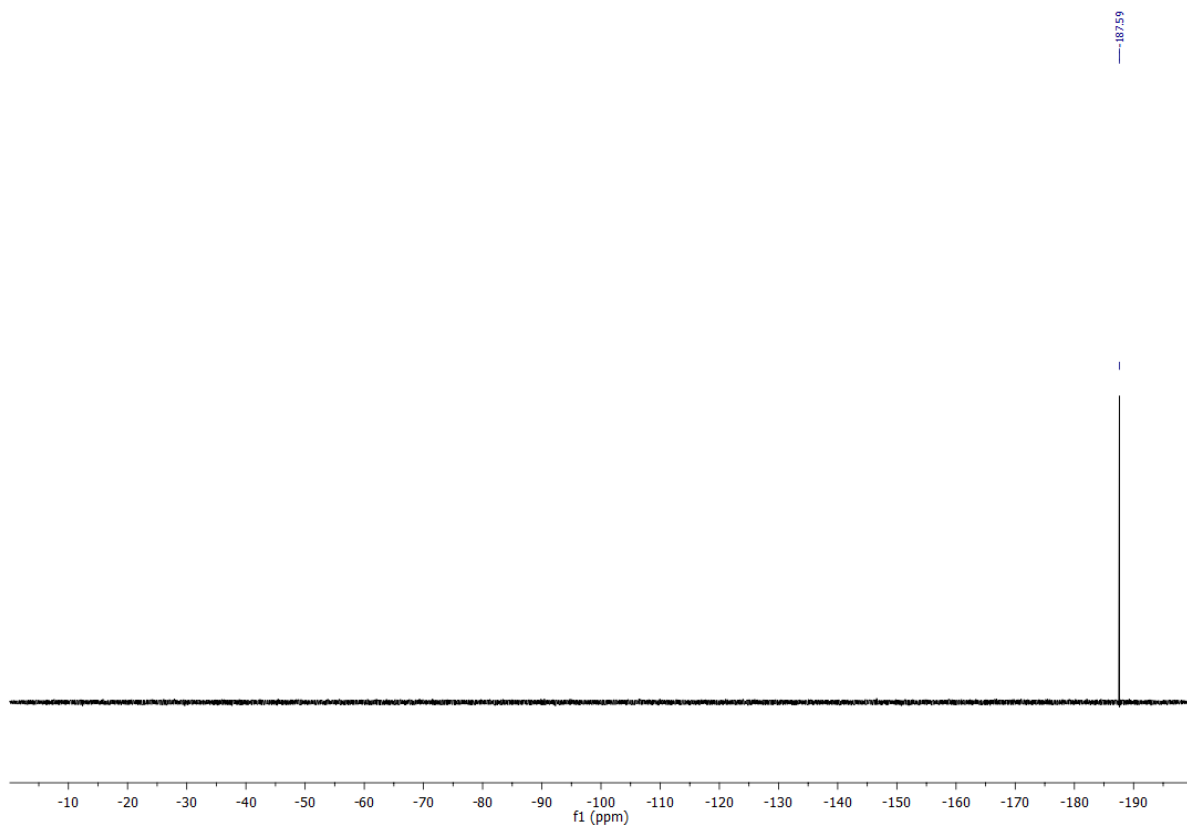

### $^1\text{H}$ NMR of 7n

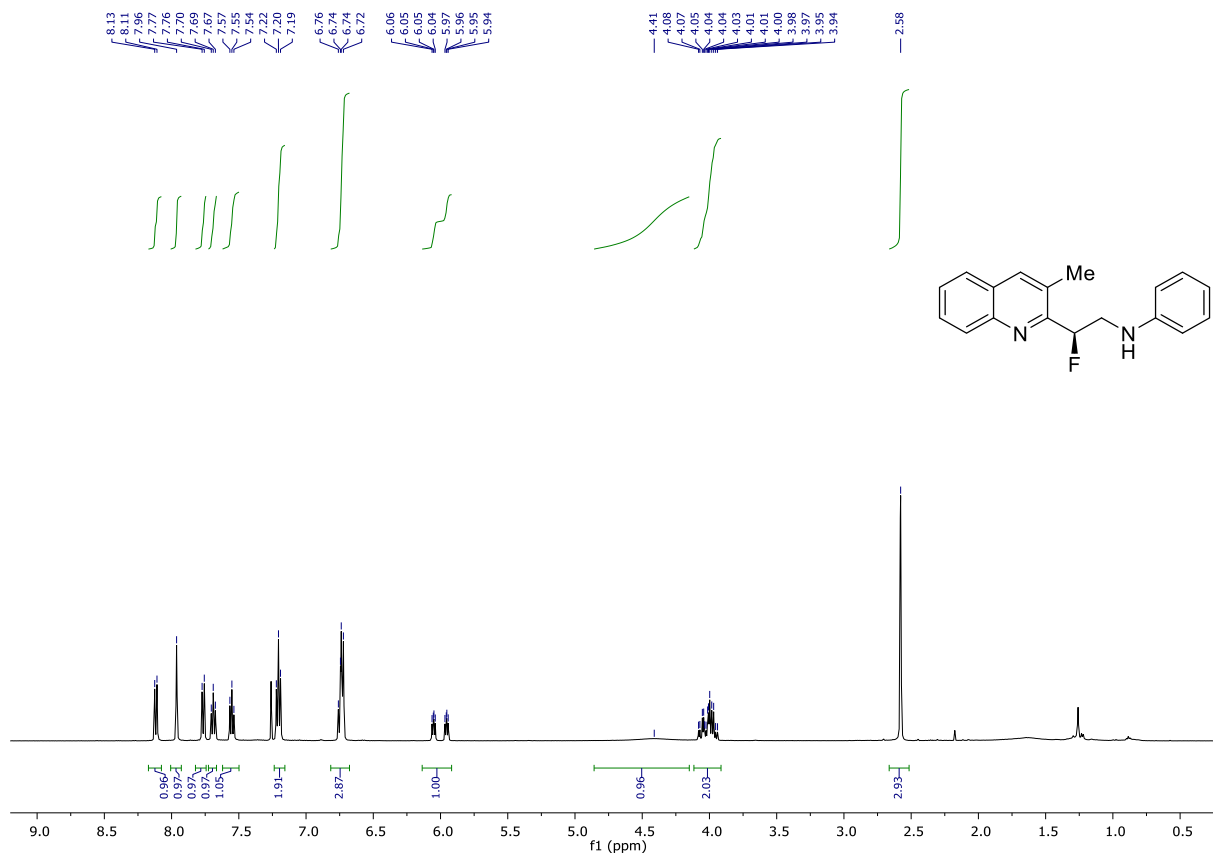

### <sup>13</sup>C NMR of 7n

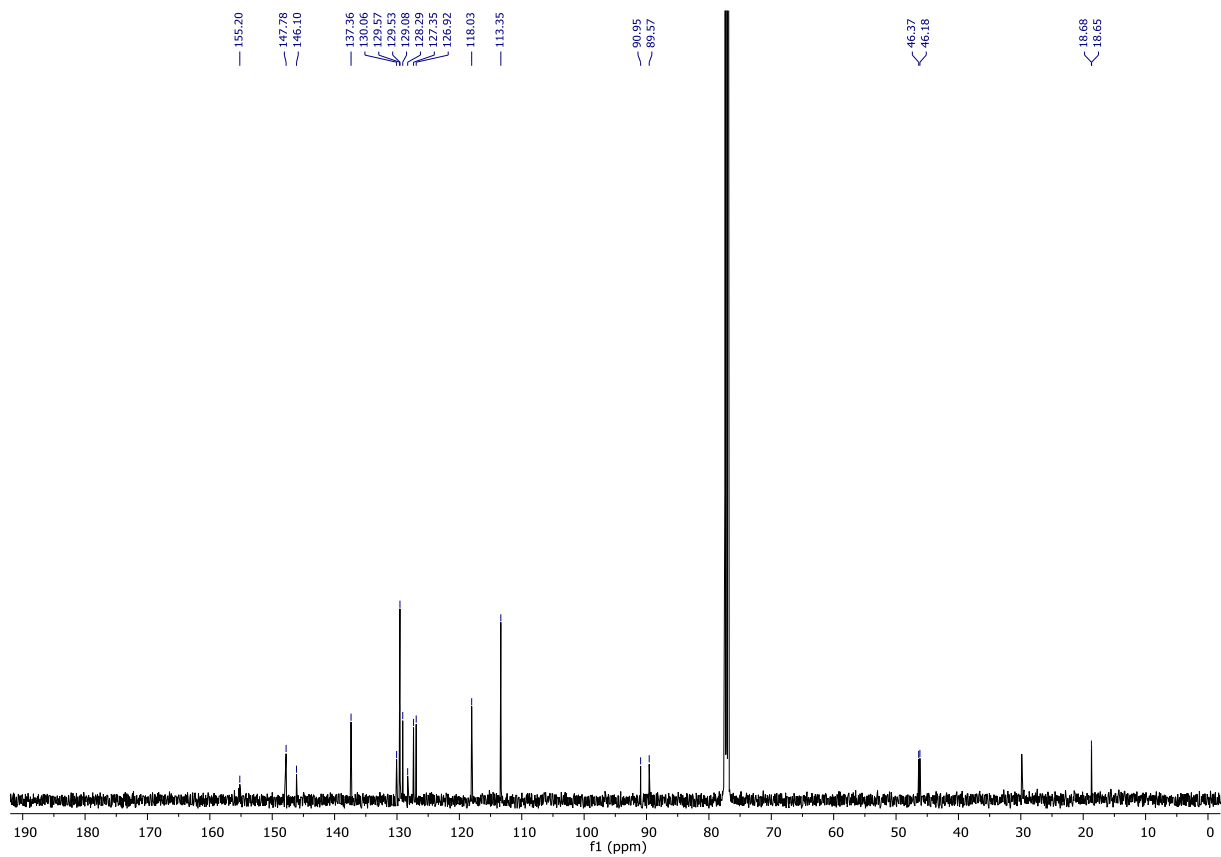

### <sup>19</sup>F NMR of 7n

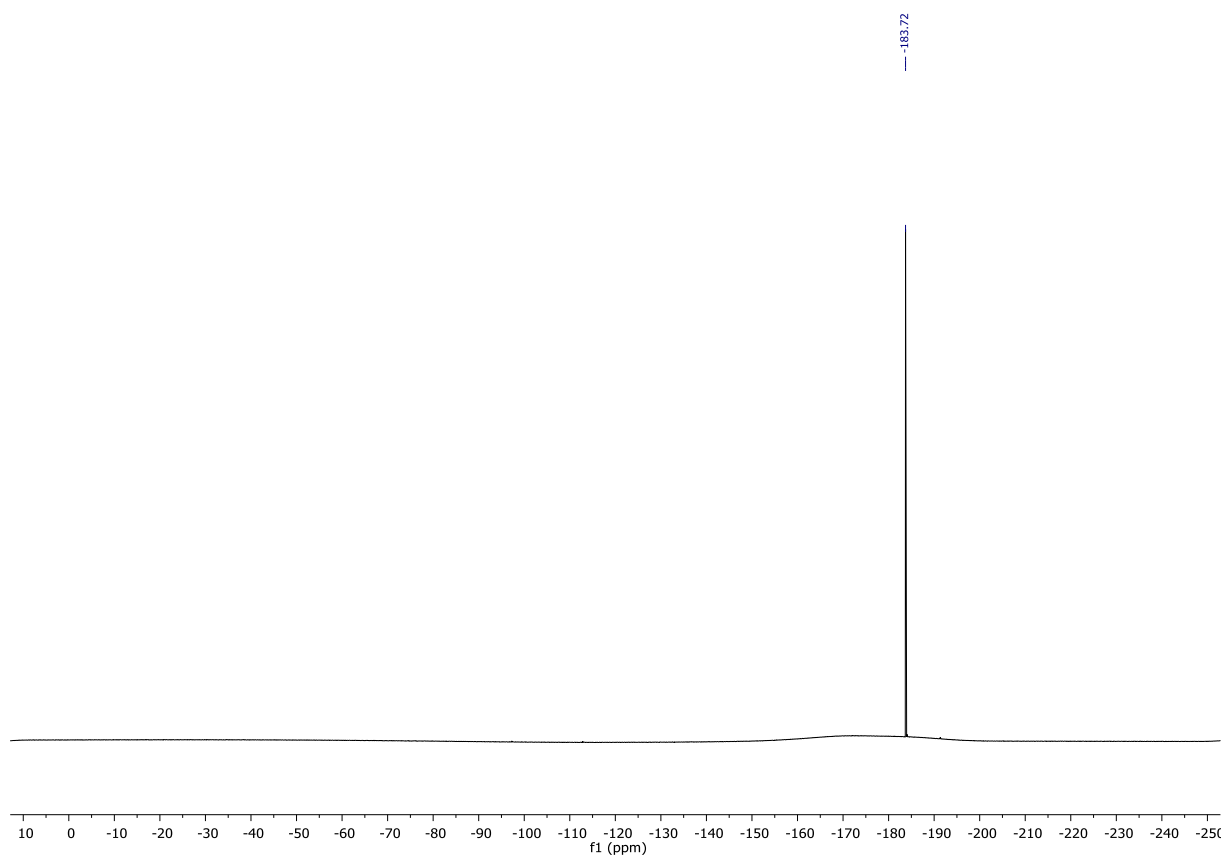

### <sup>1</sup>H NMR of 7o

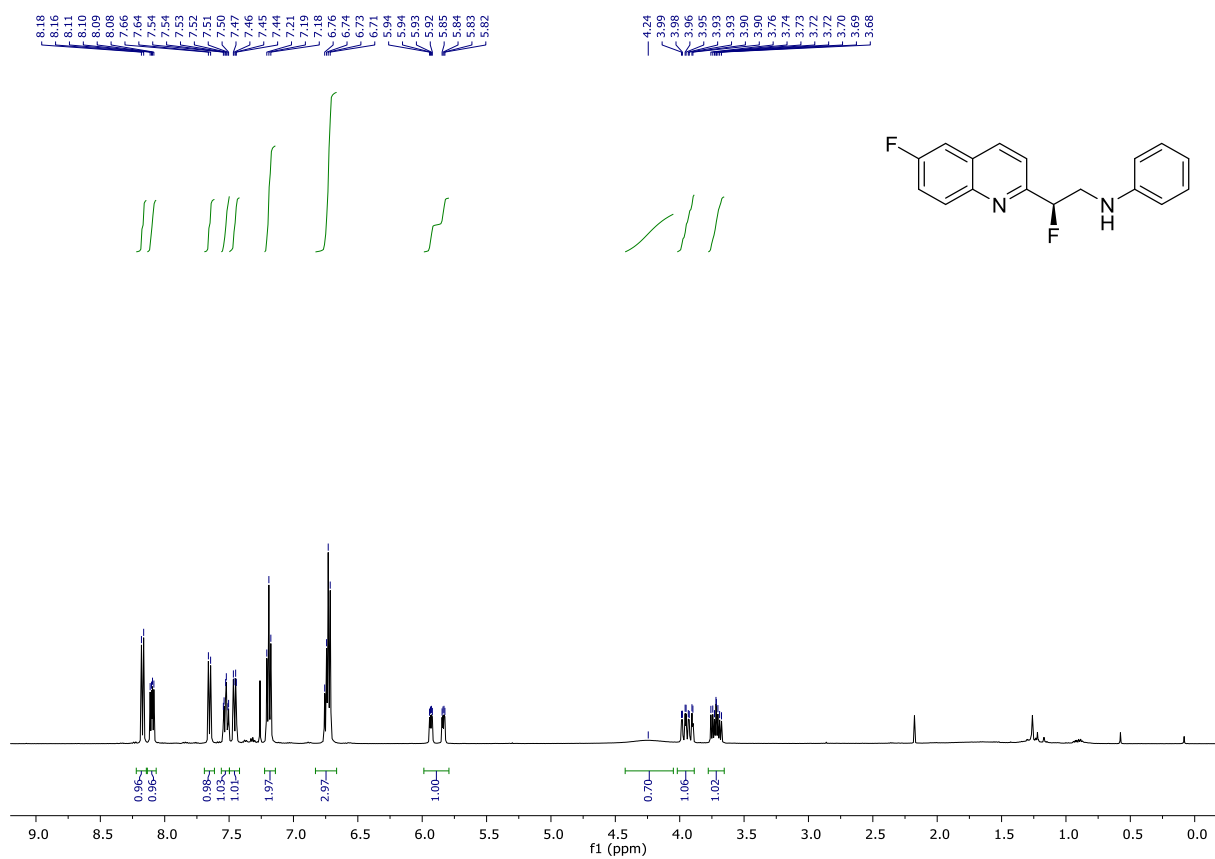

### <sup>13</sup>C NMR of 7o

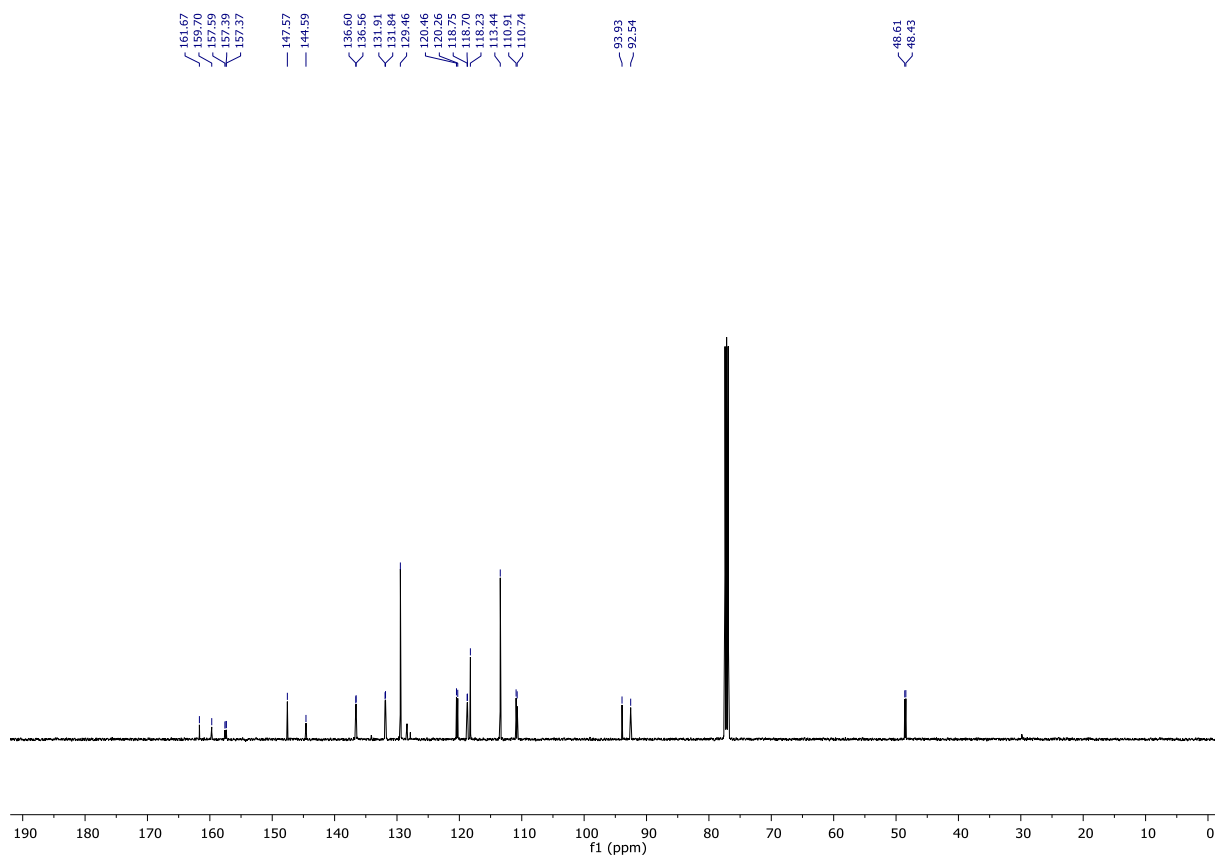



### <sup>19</sup>F NMR of 7o

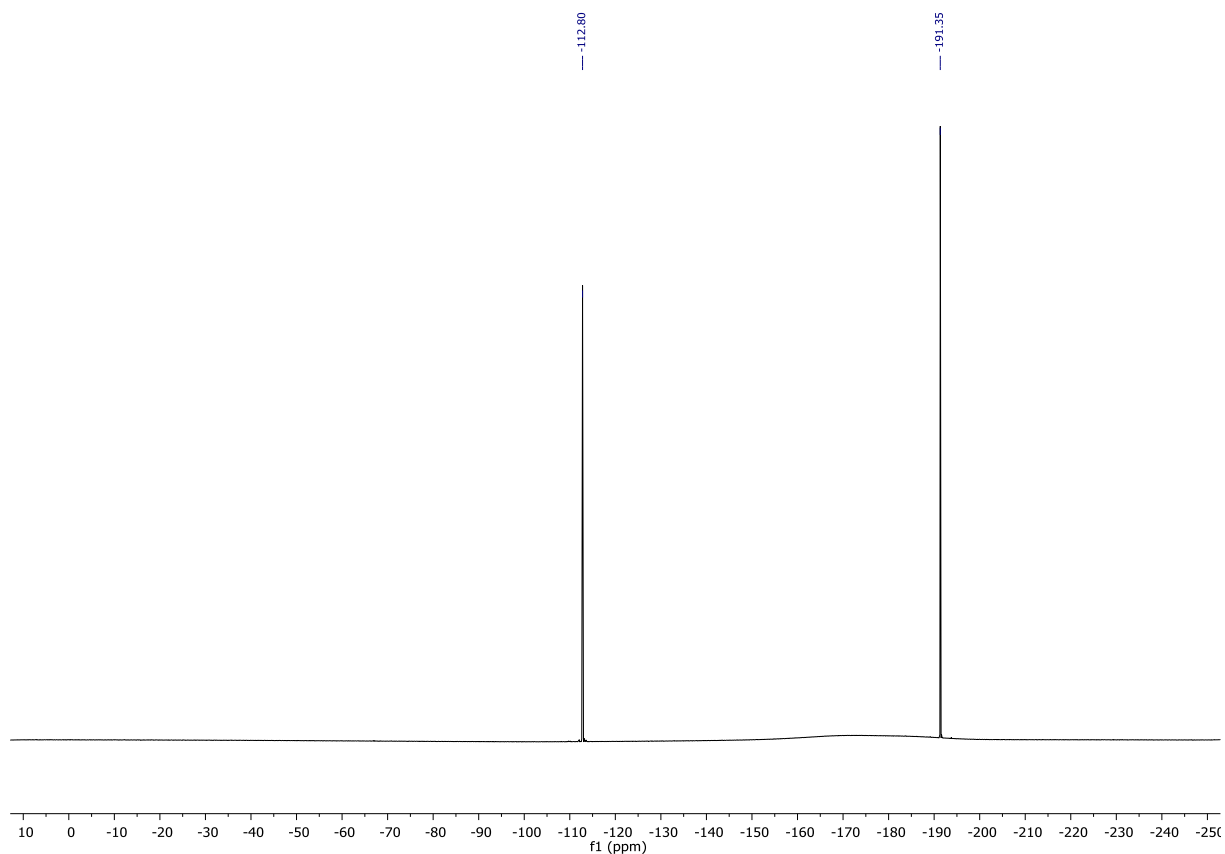

### <sup>1</sup>H NMR of 7p

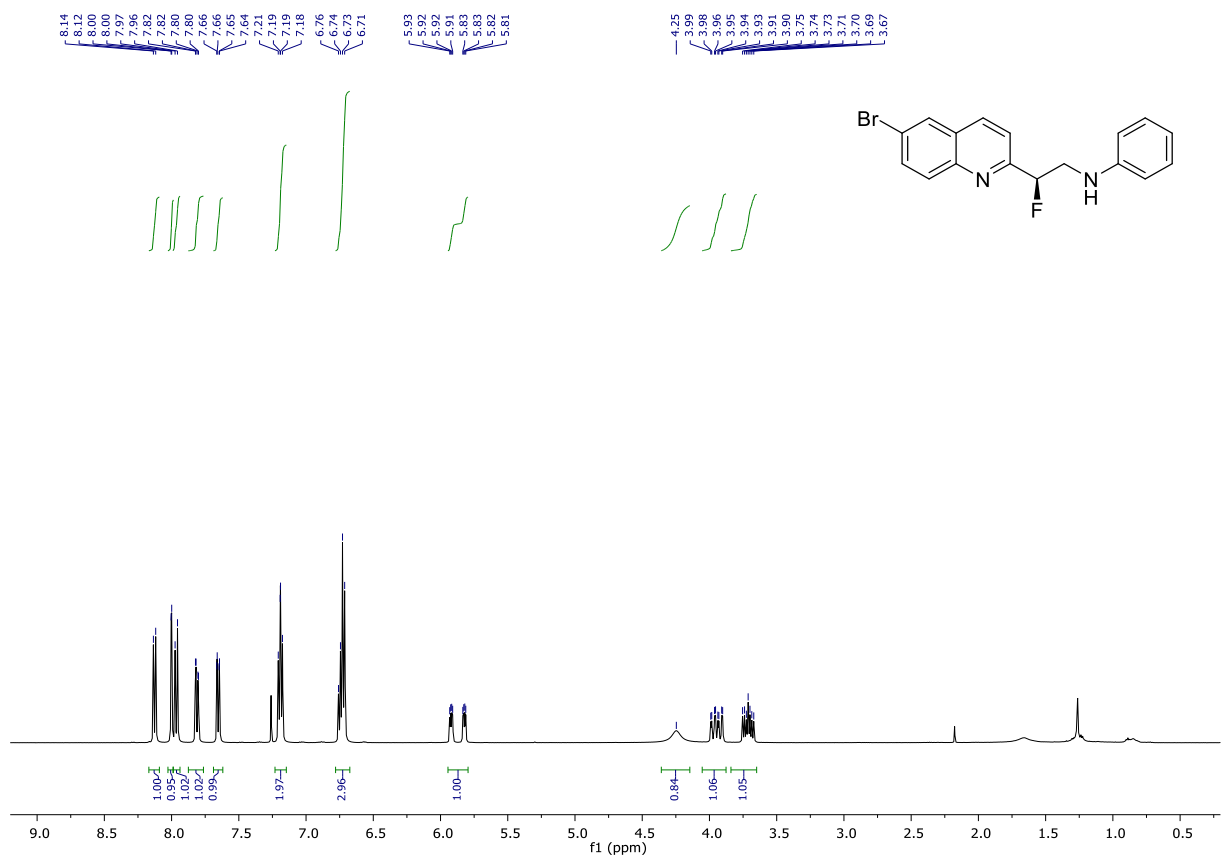

### <sup>13</sup>C NMR of 7p

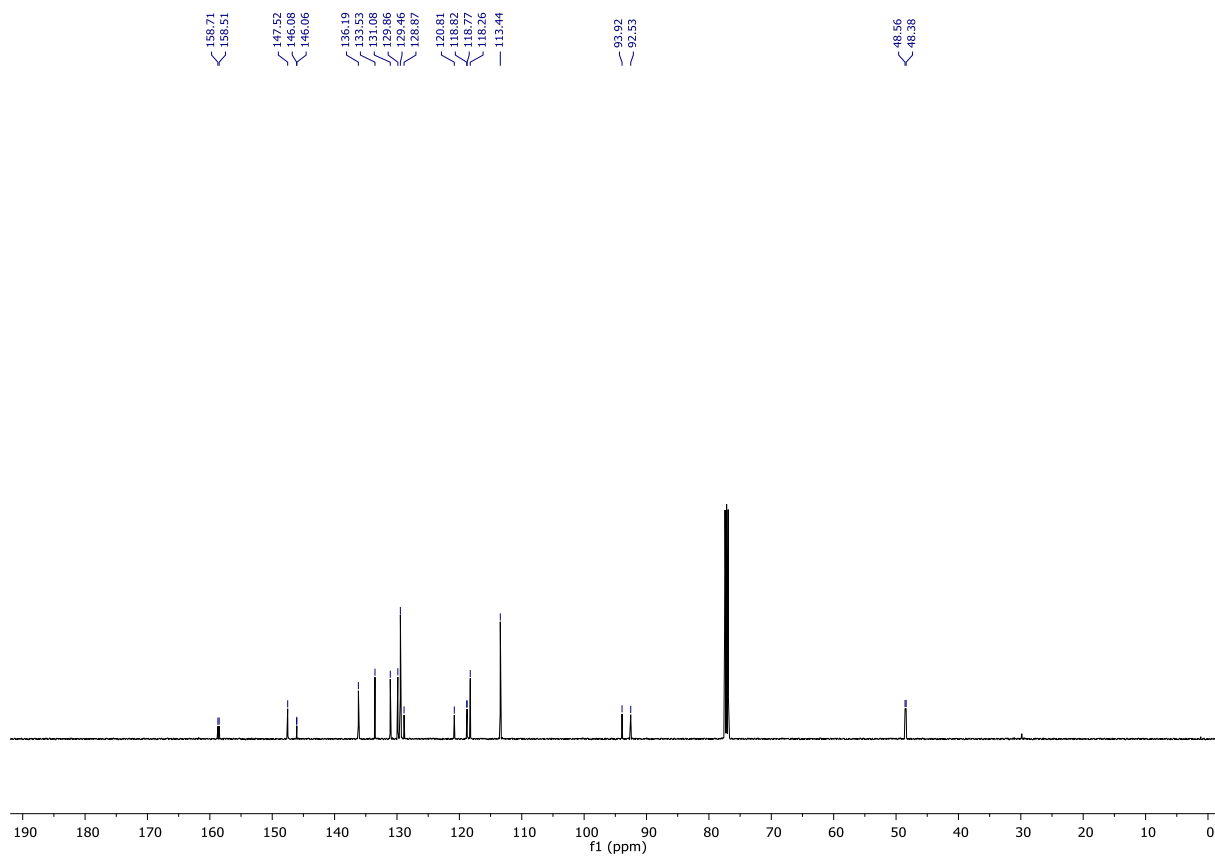

### <sup>19</sup>F NMR of 7p

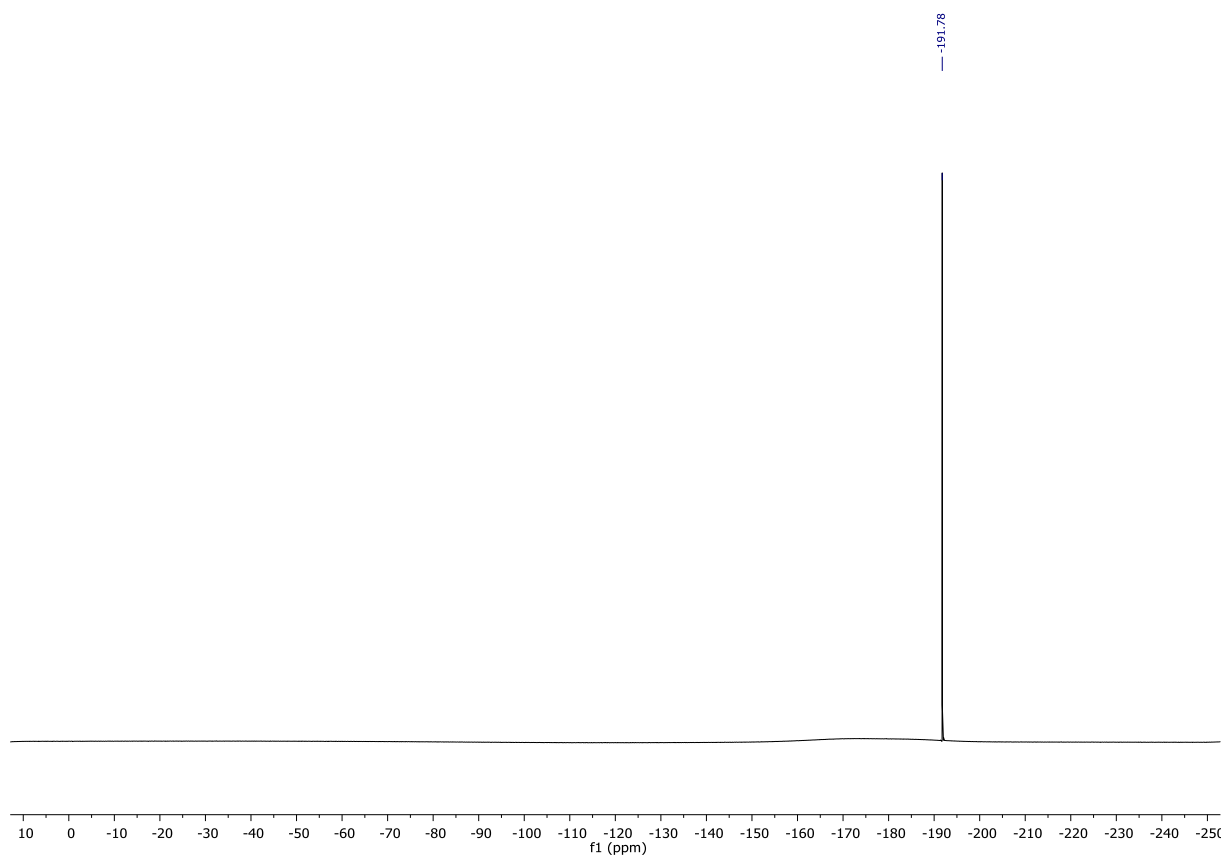

### <sup>1</sup>H NMR of 7q

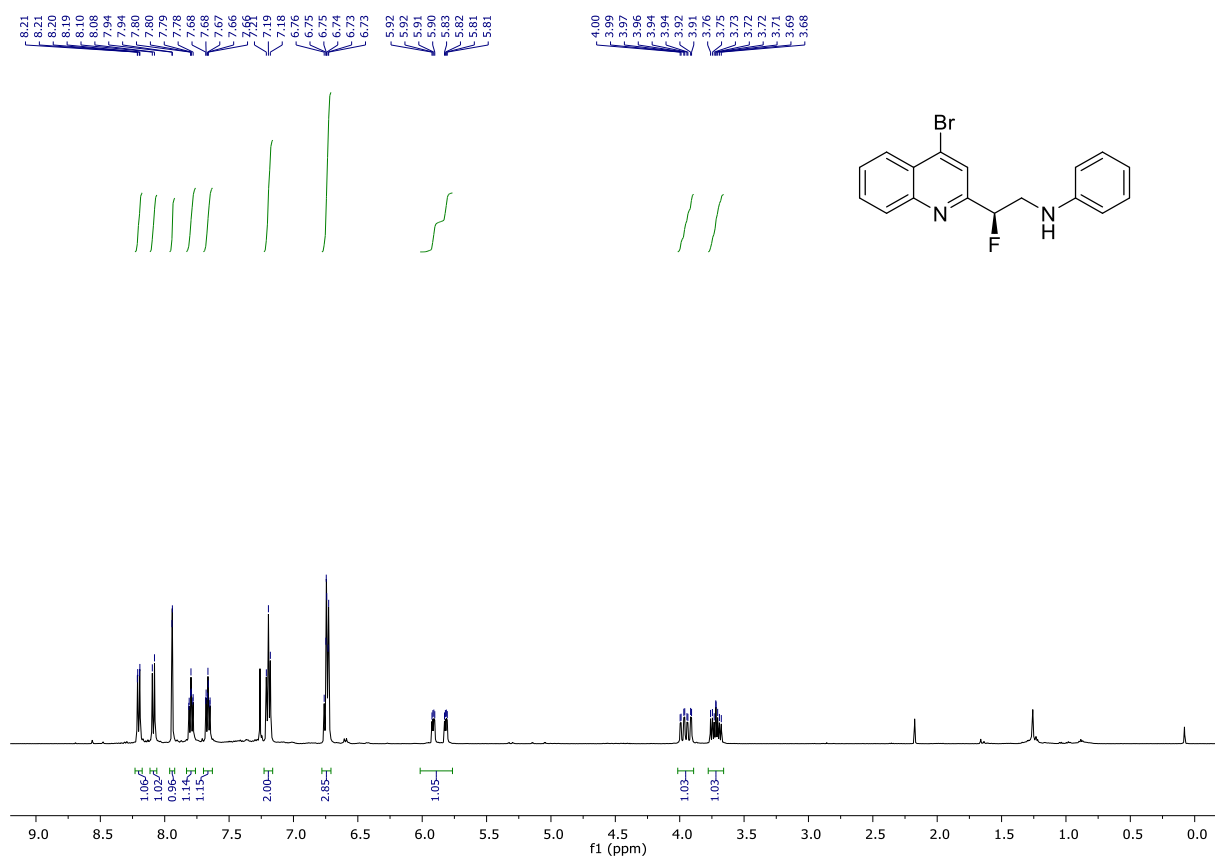

### <sup>13</sup>C NMR of 7q

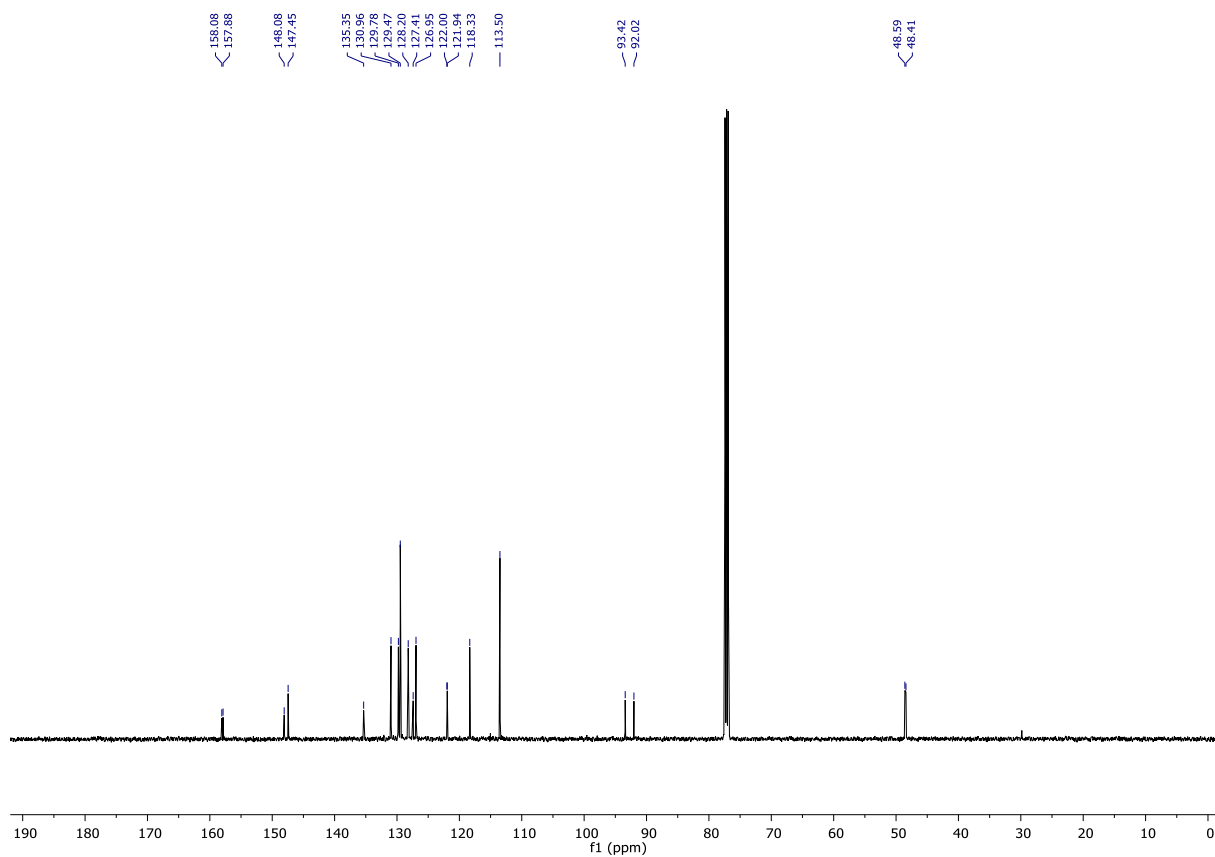

### <sup>19</sup>F NMR of 7q

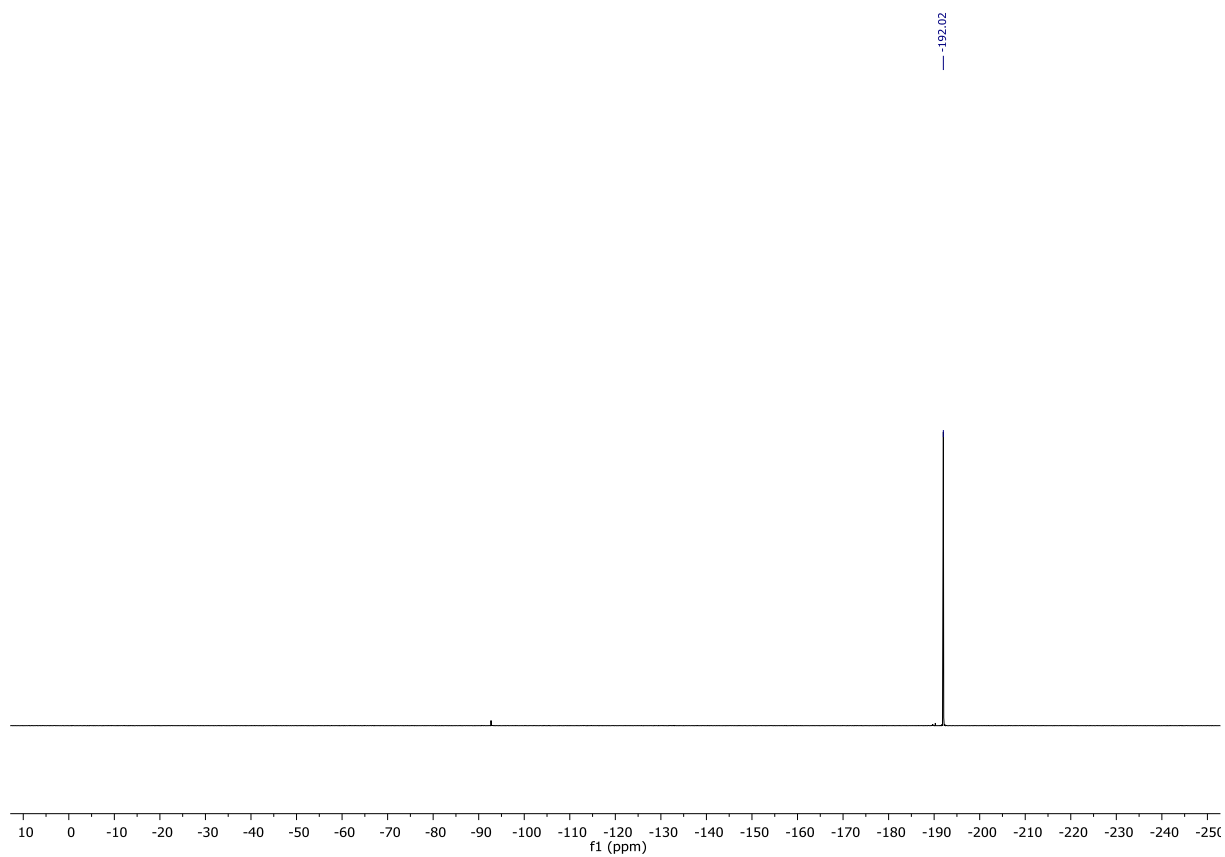

### <sup>1</sup>H NMR of 7r

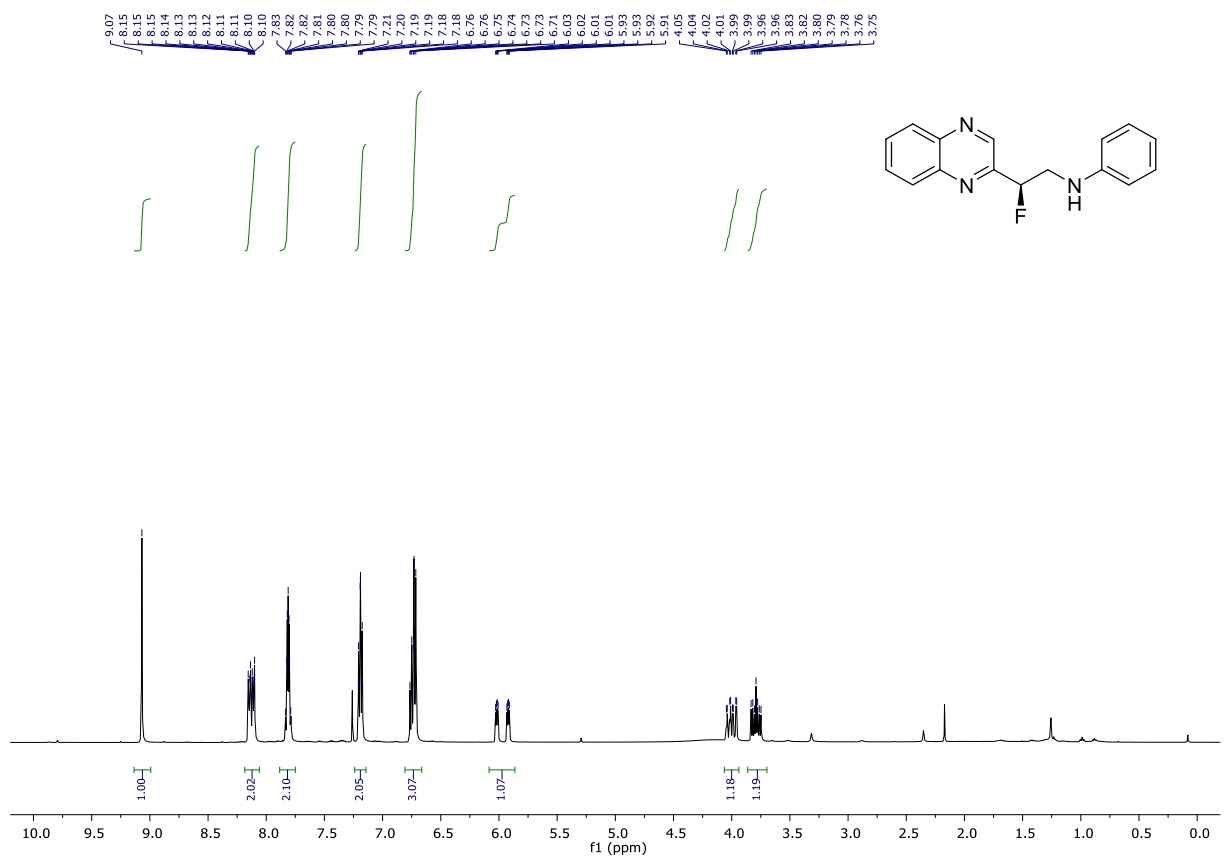

### <sup>13</sup>C NMR of 7r

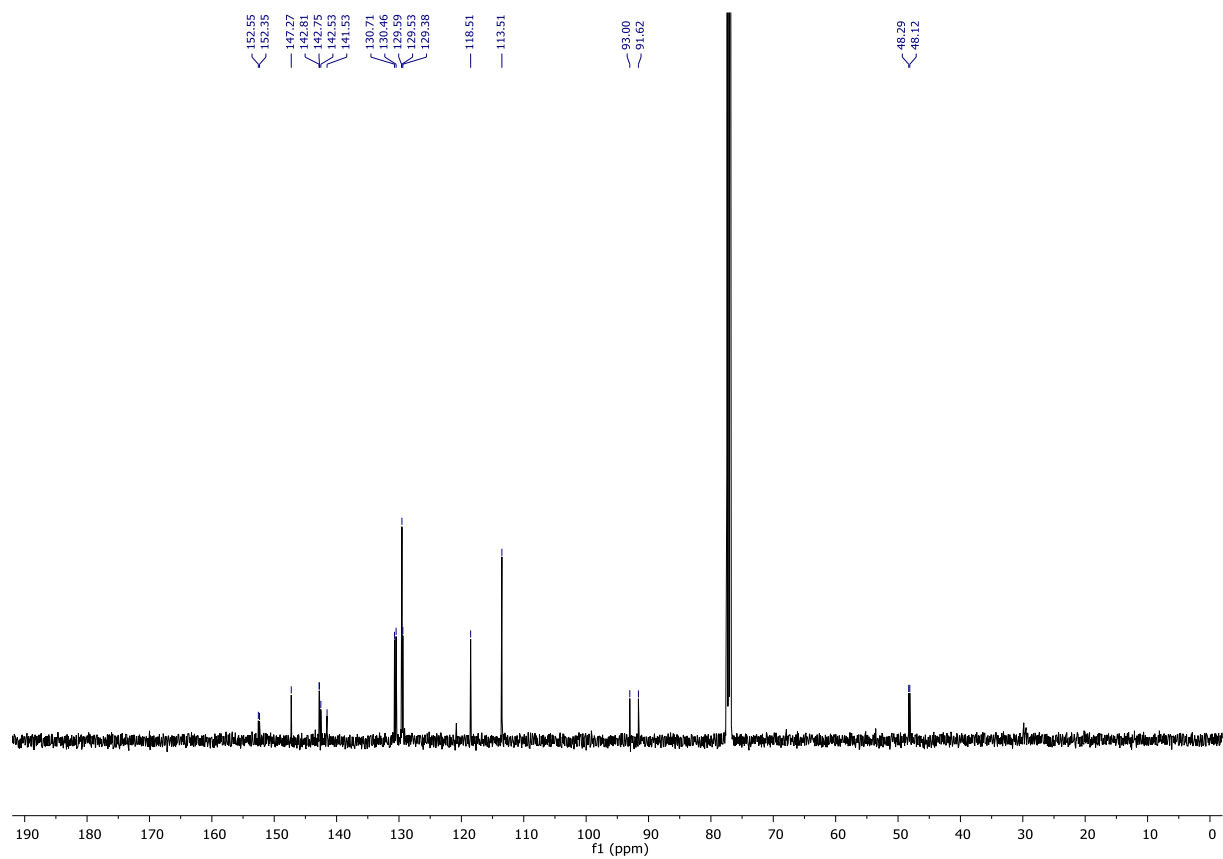

### <sup>19</sup>F NMR of 7r

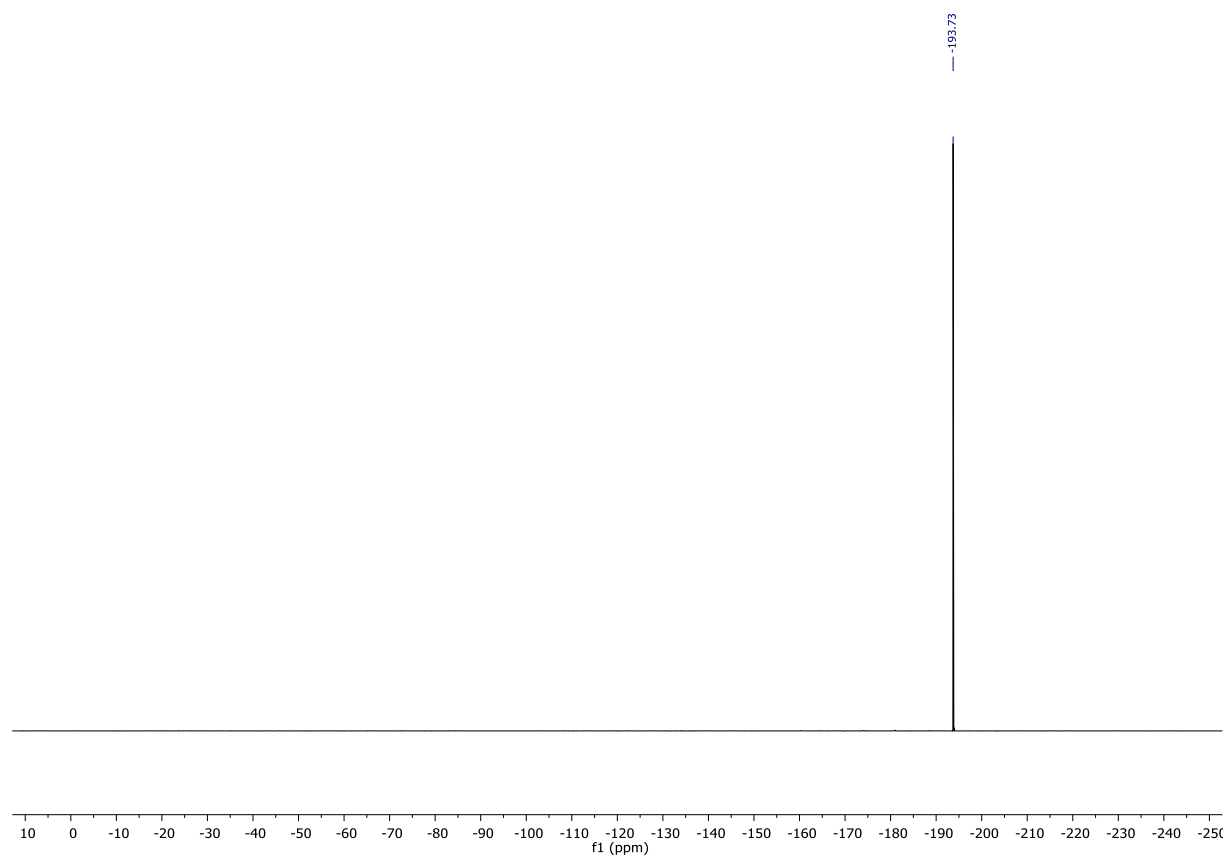

### <sup>1</sup>H NMR of 7s

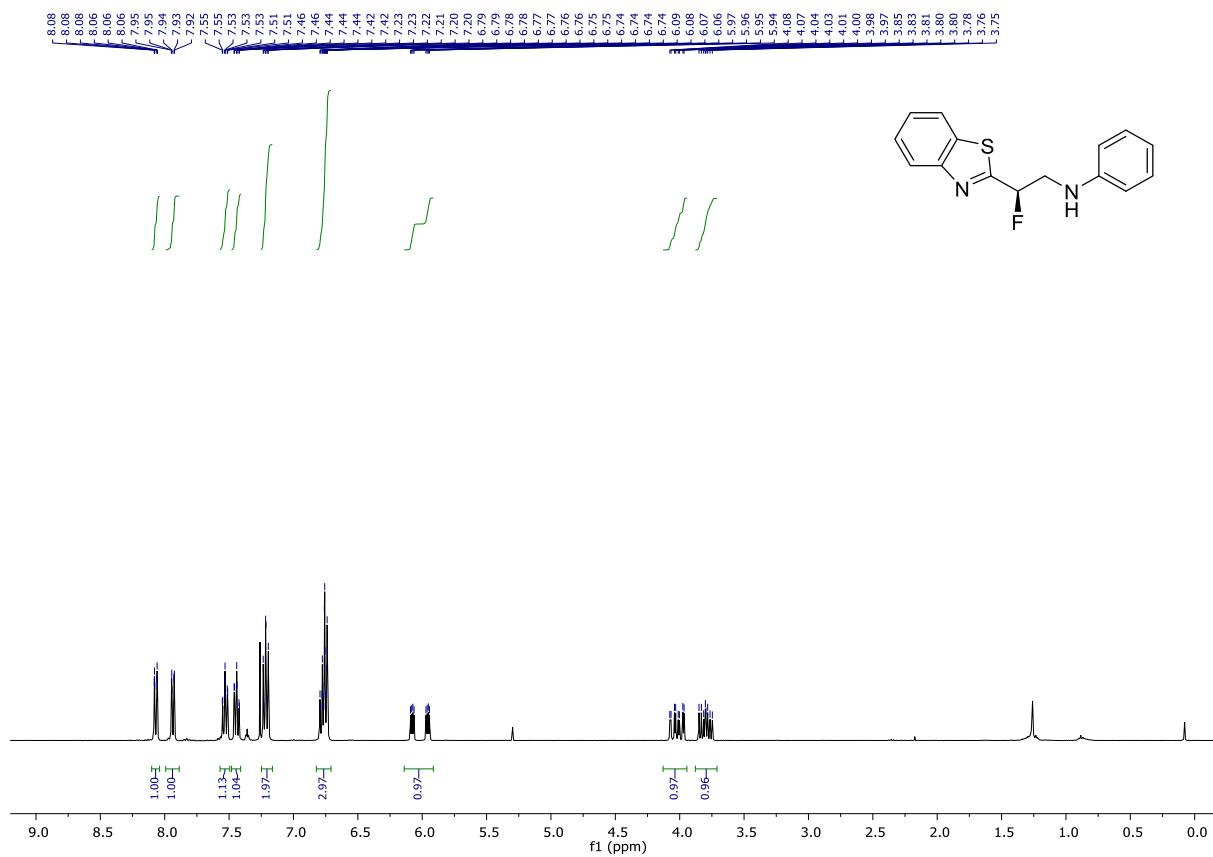

### <sup>13</sup>C NMR of 7s

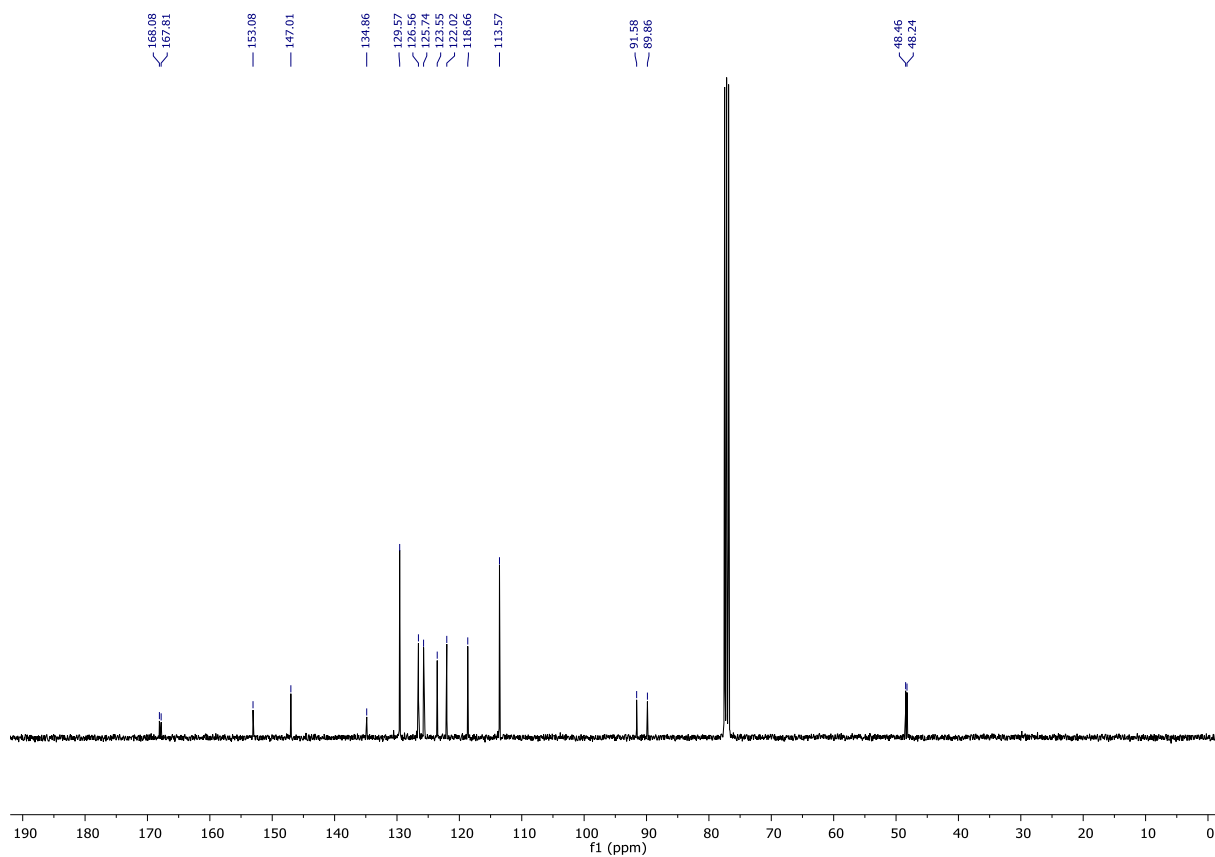

### <sup>19</sup>F NMR of 7s

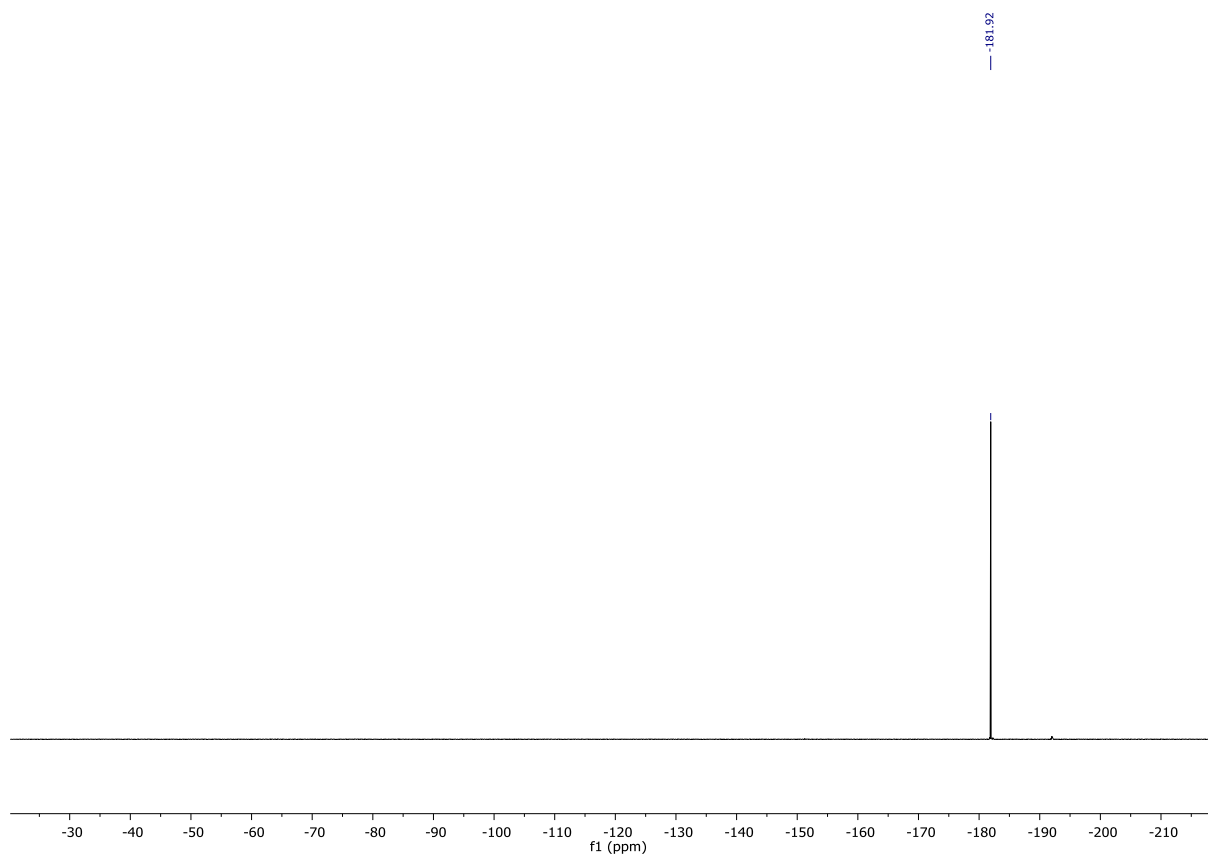

### <sup>1</sup>H NMR of 7t

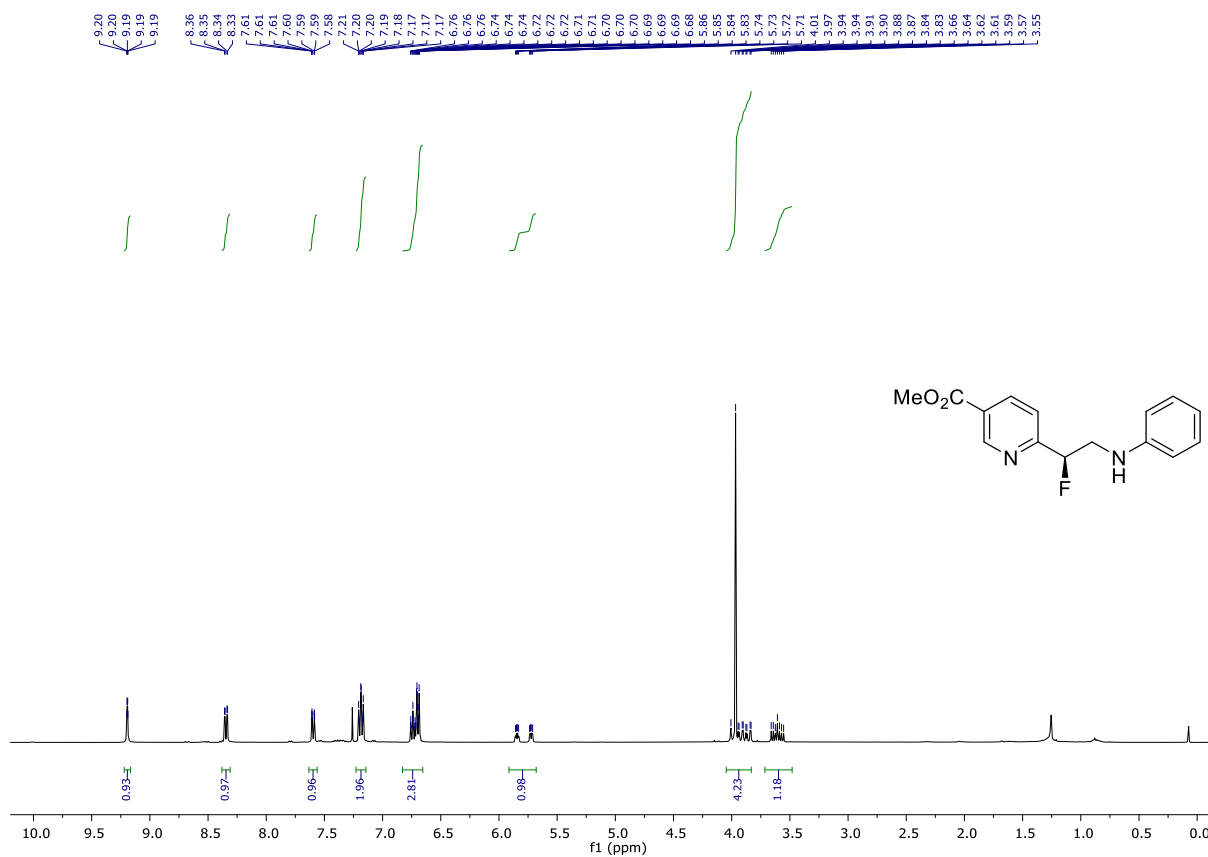

### <sup>13</sup>C NMR of 7t

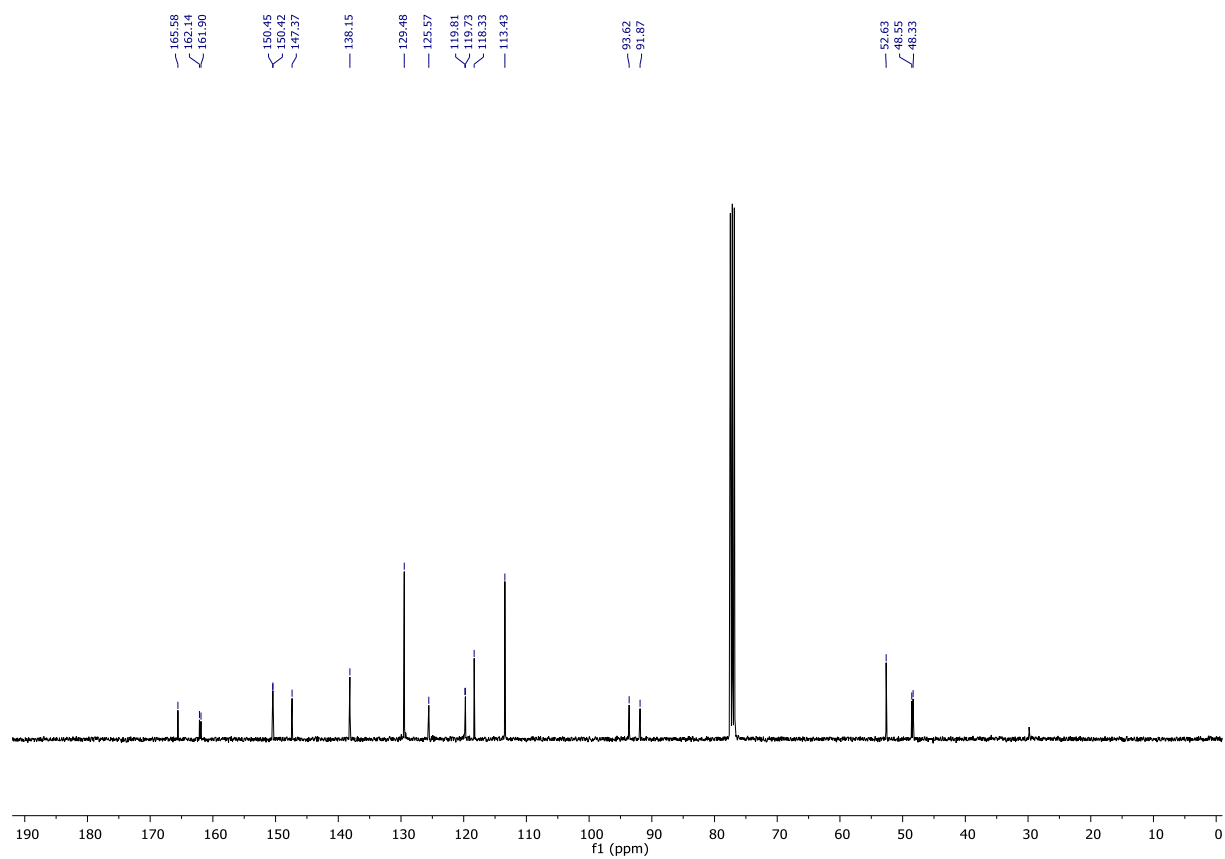

### <sup>19</sup>F NMR of 7t

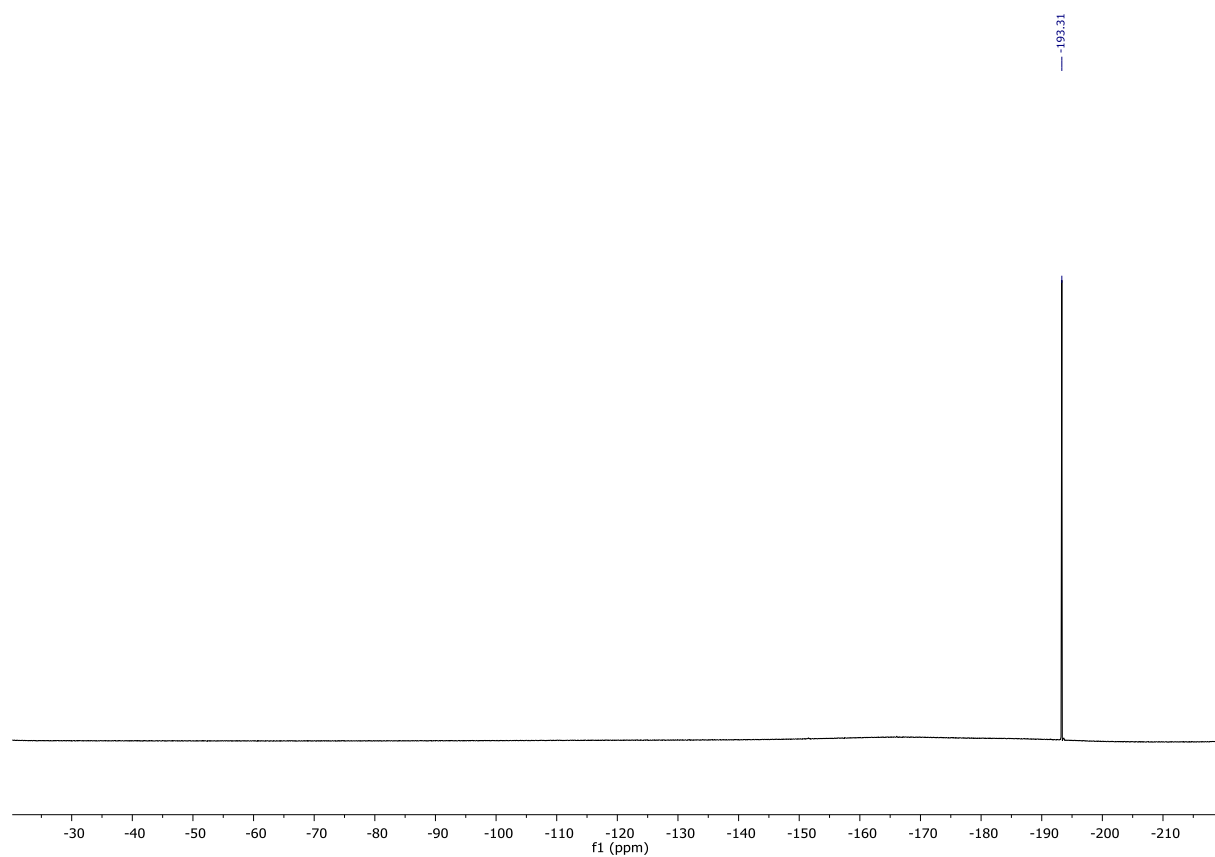



### <sup>1</sup>H NMR of 7u

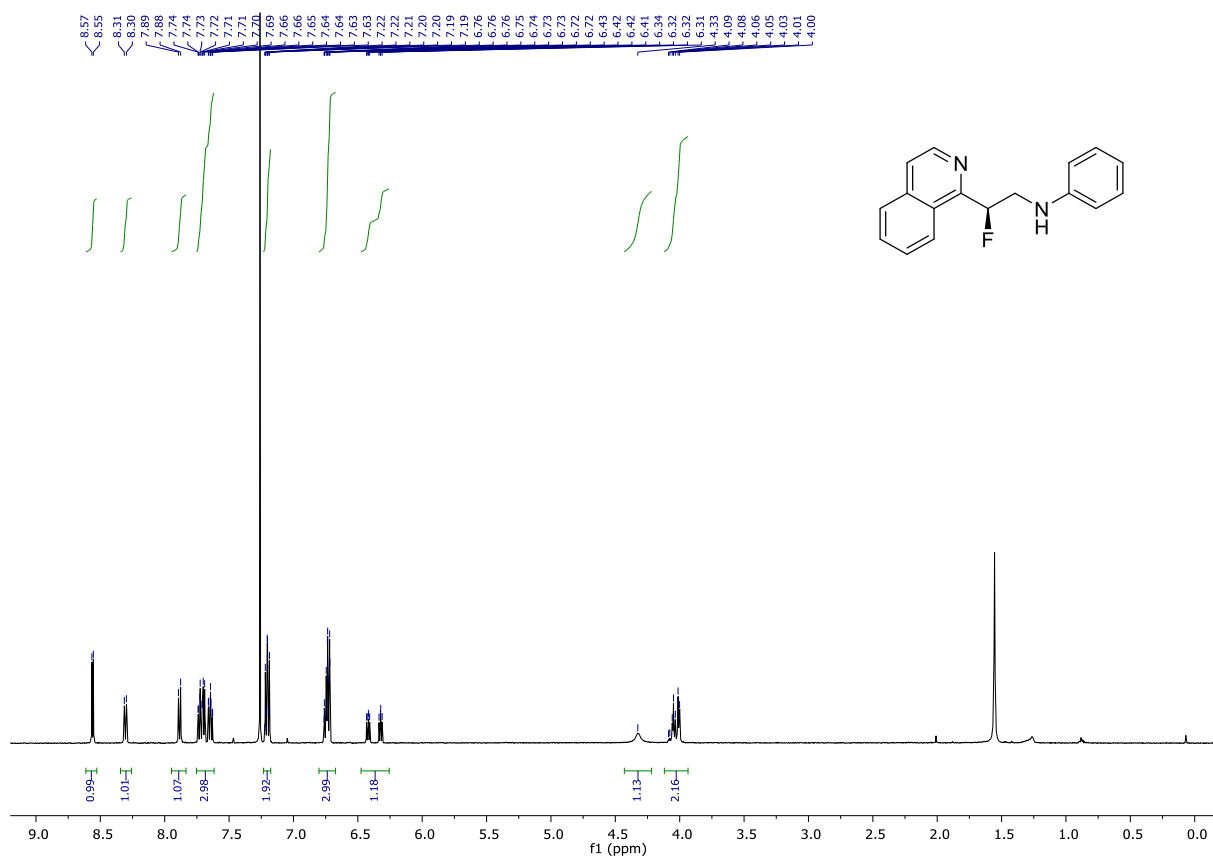

### <sup>13</sup>C NMR of 7u

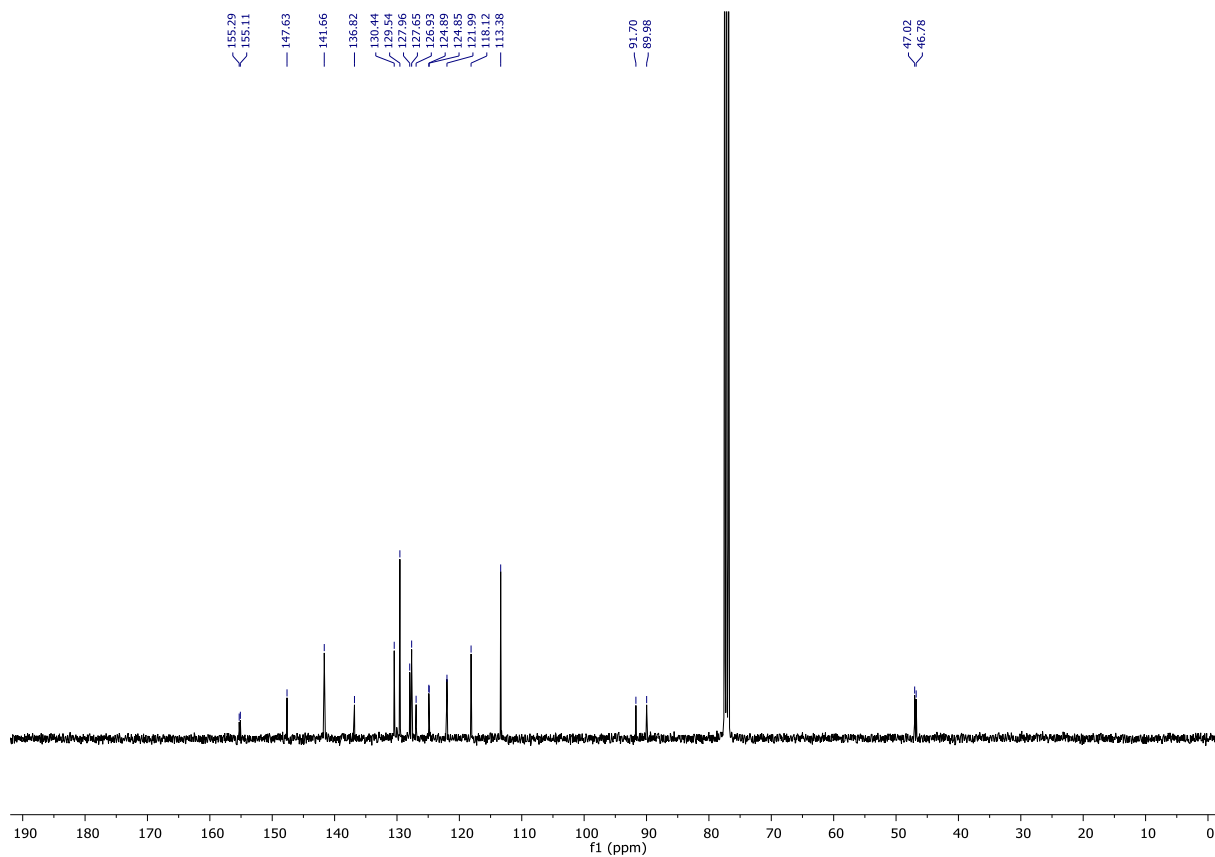

**<sup>19</sup>F NMR of 7u**

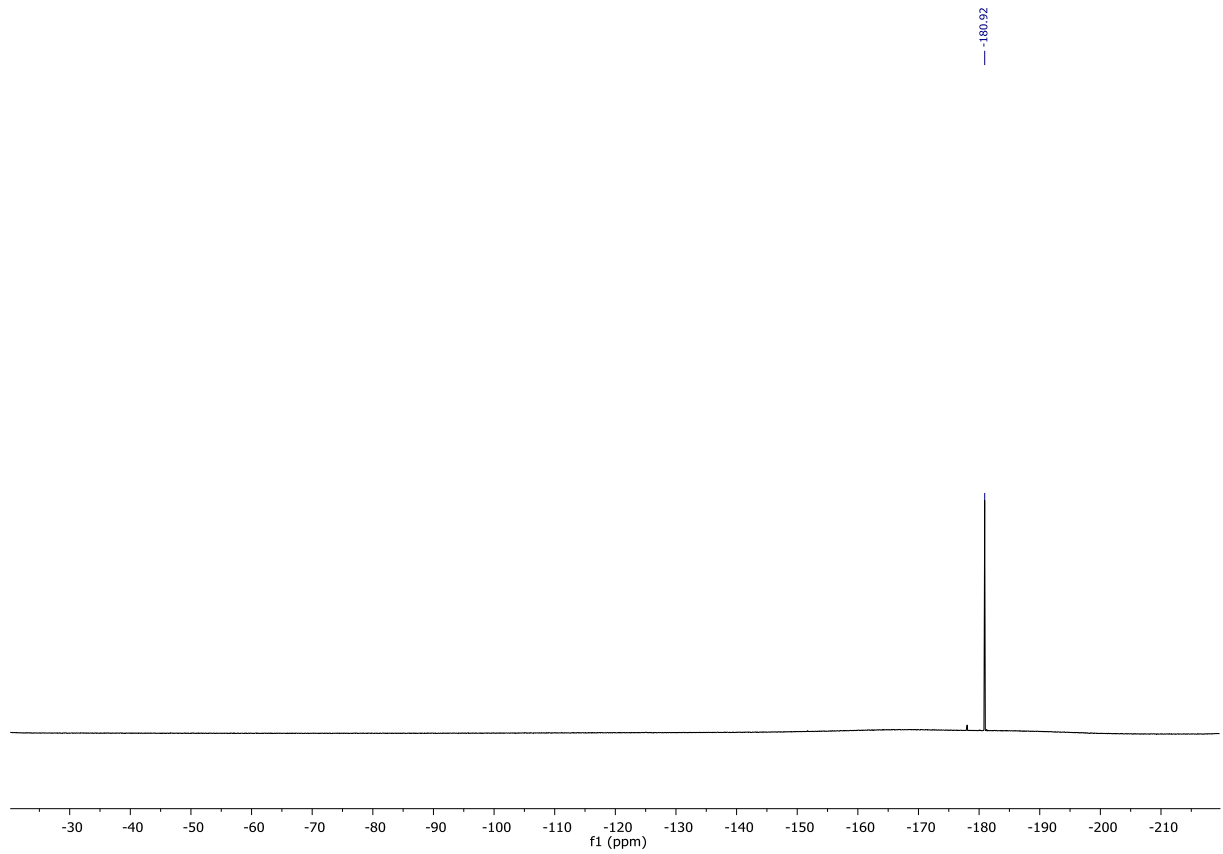

**<sup>1</sup>H NMR of 7v**

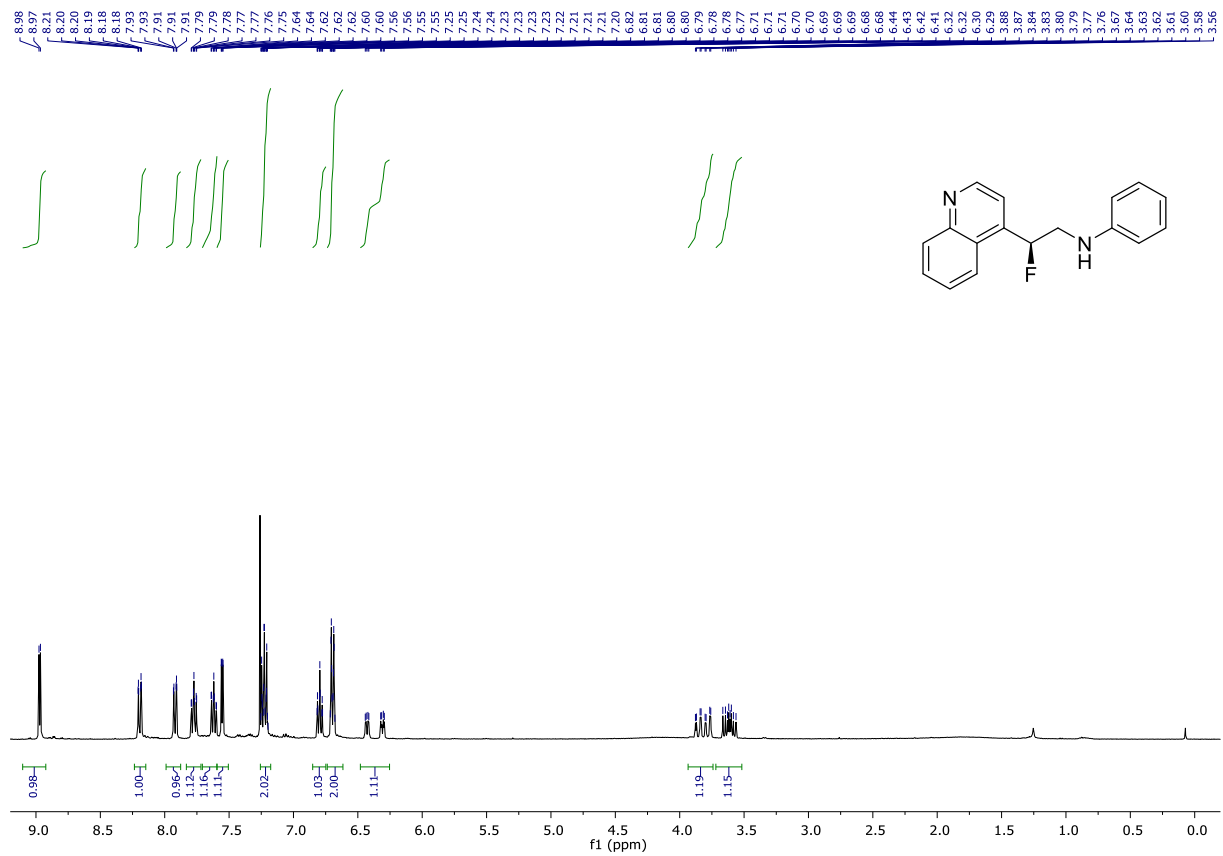

### <sup>13</sup>C NMR of 7v

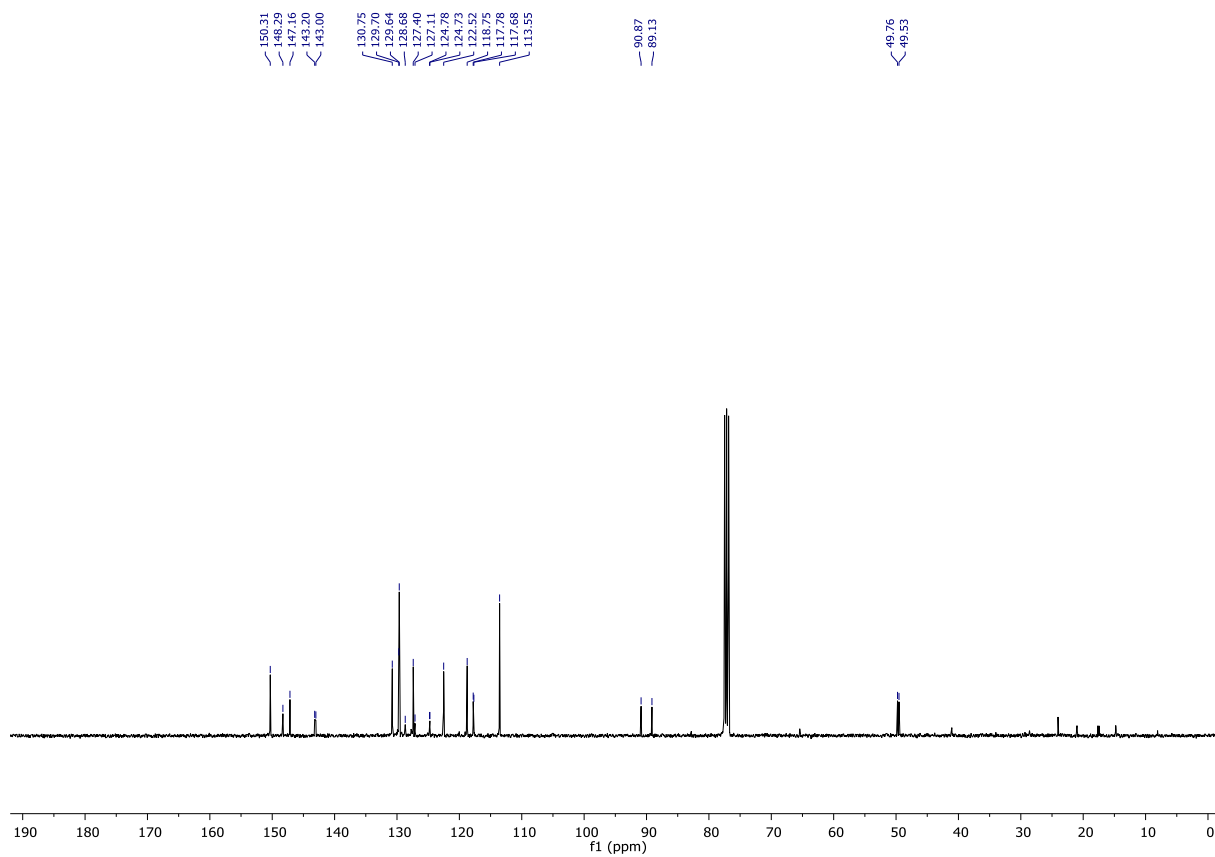

### <sup>19</sup>F NMR of 7v

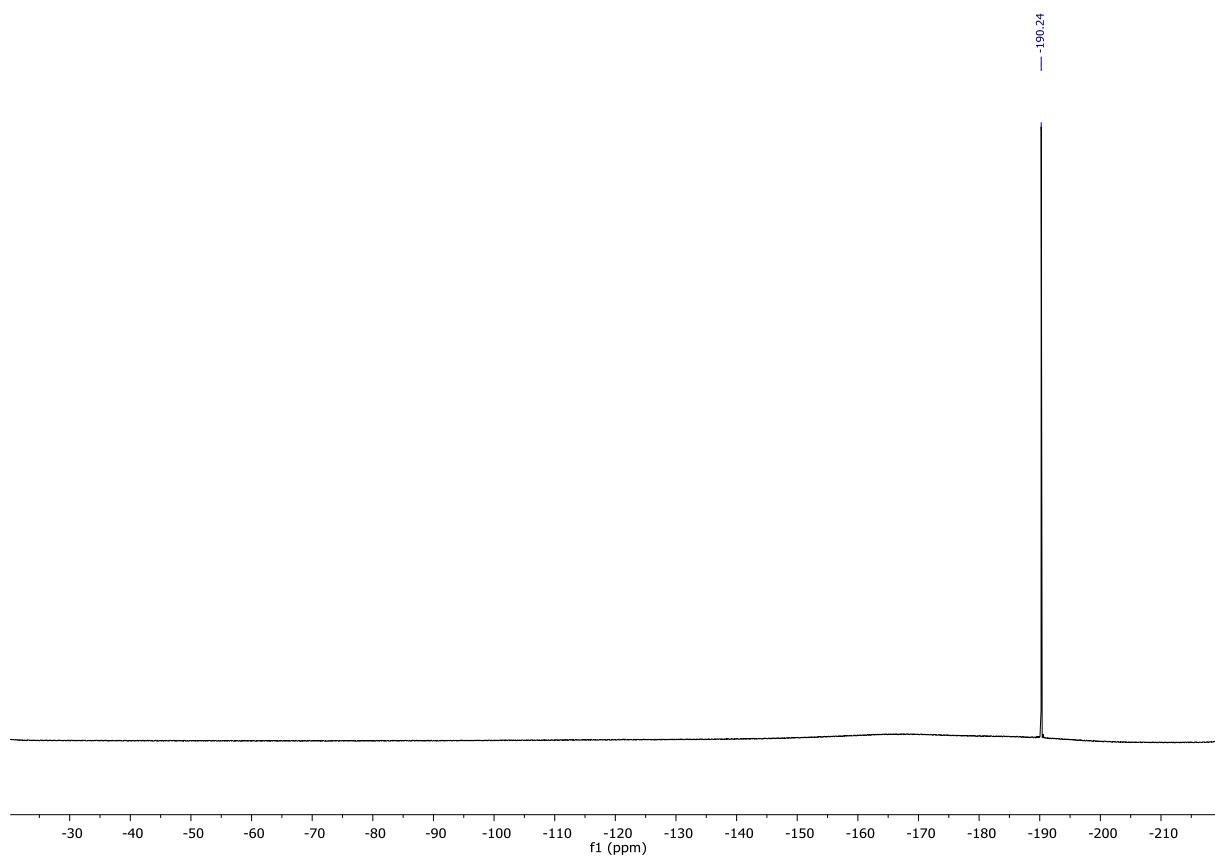

### <sup>1</sup>H NMR of 7w

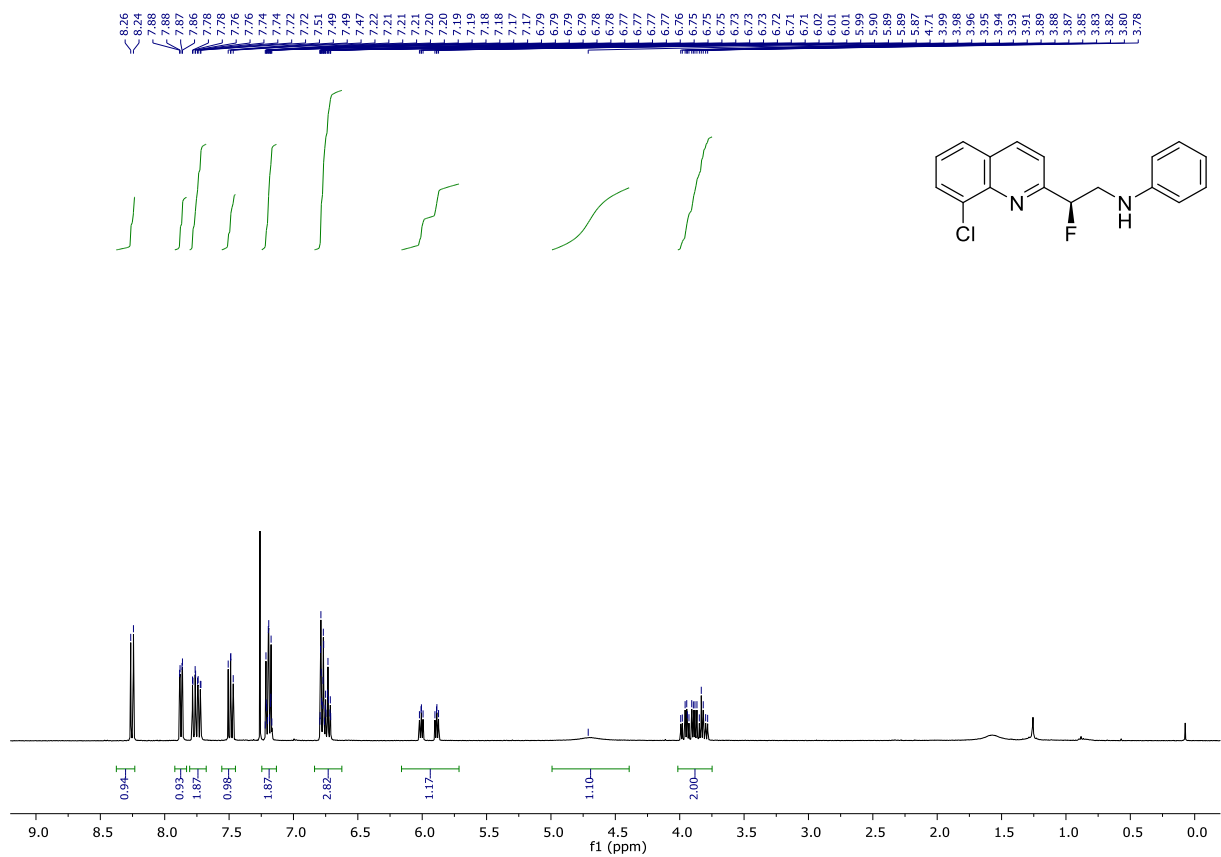

### <sup>13</sup>C NMR of 7w

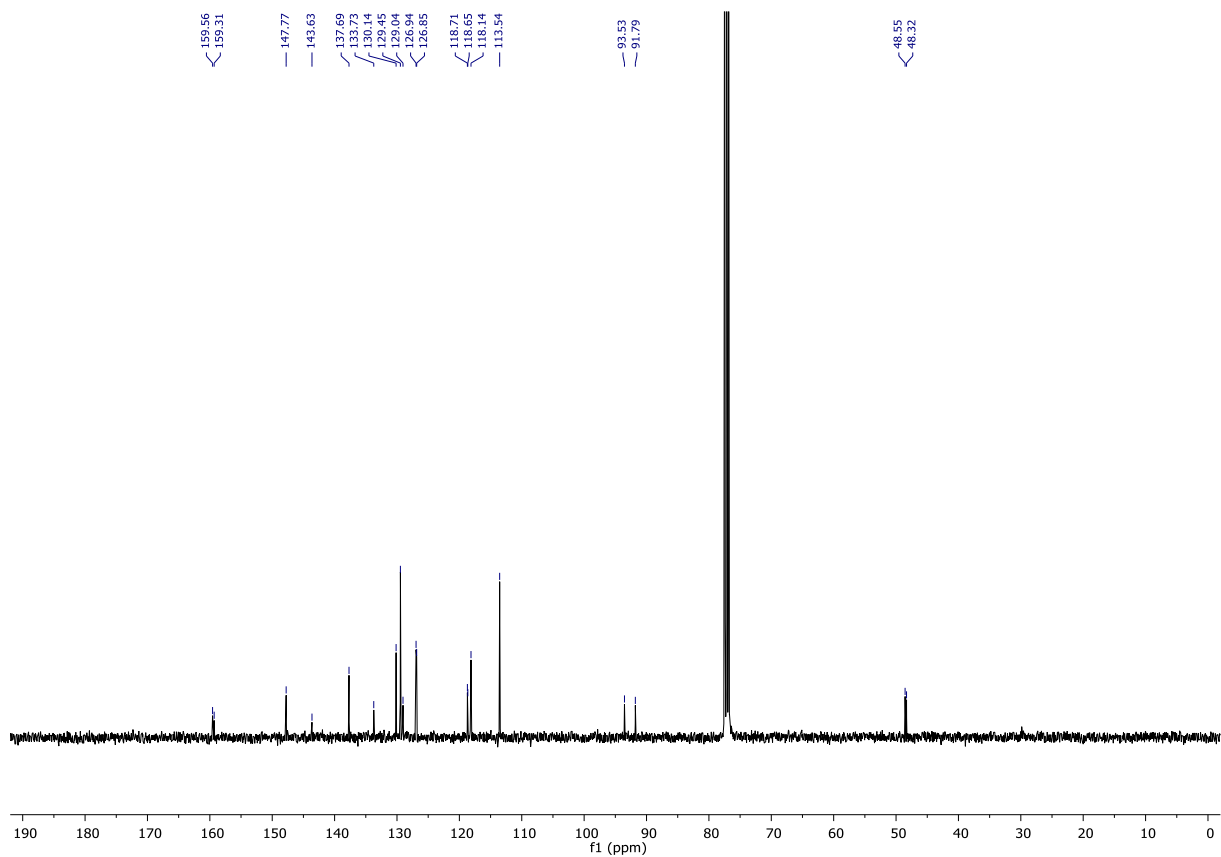

### <sup>19</sup>F NMR of 7w

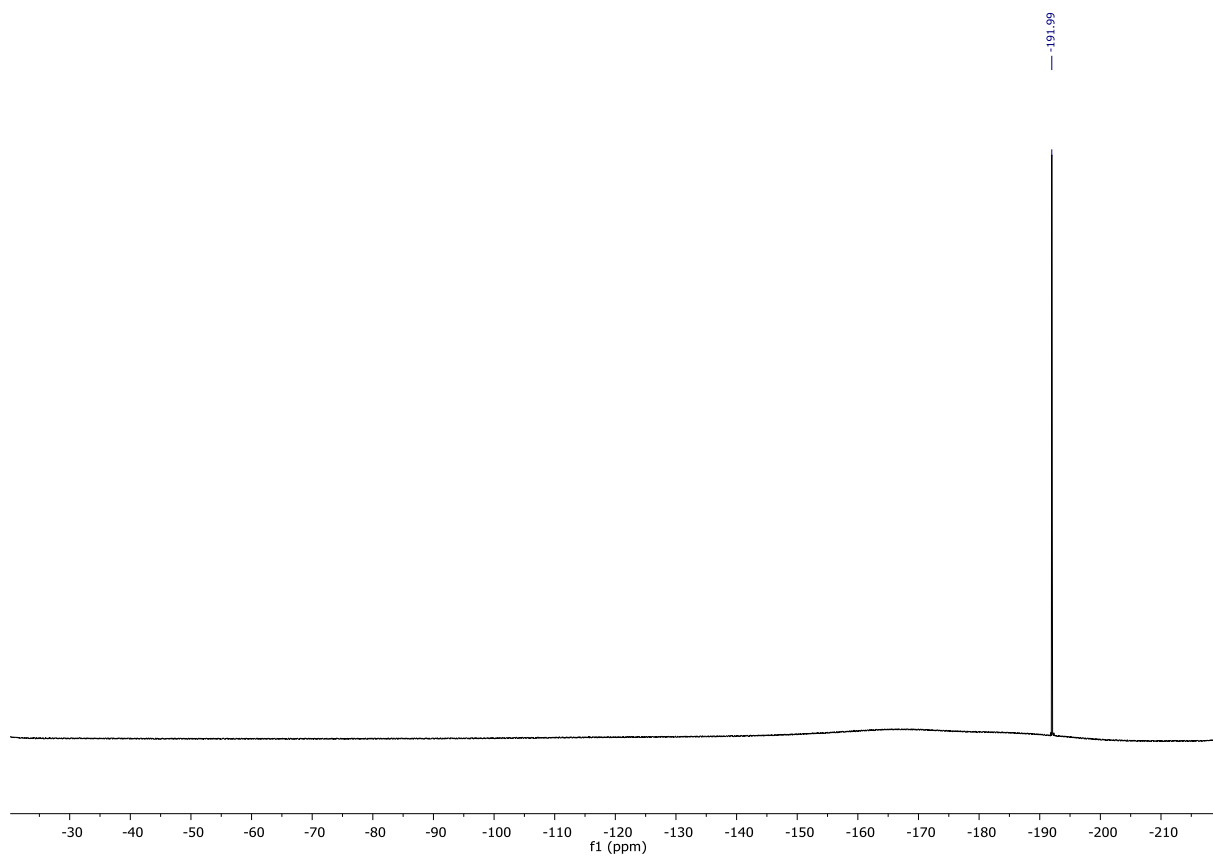

### <sup>1</sup>H NMR of 10

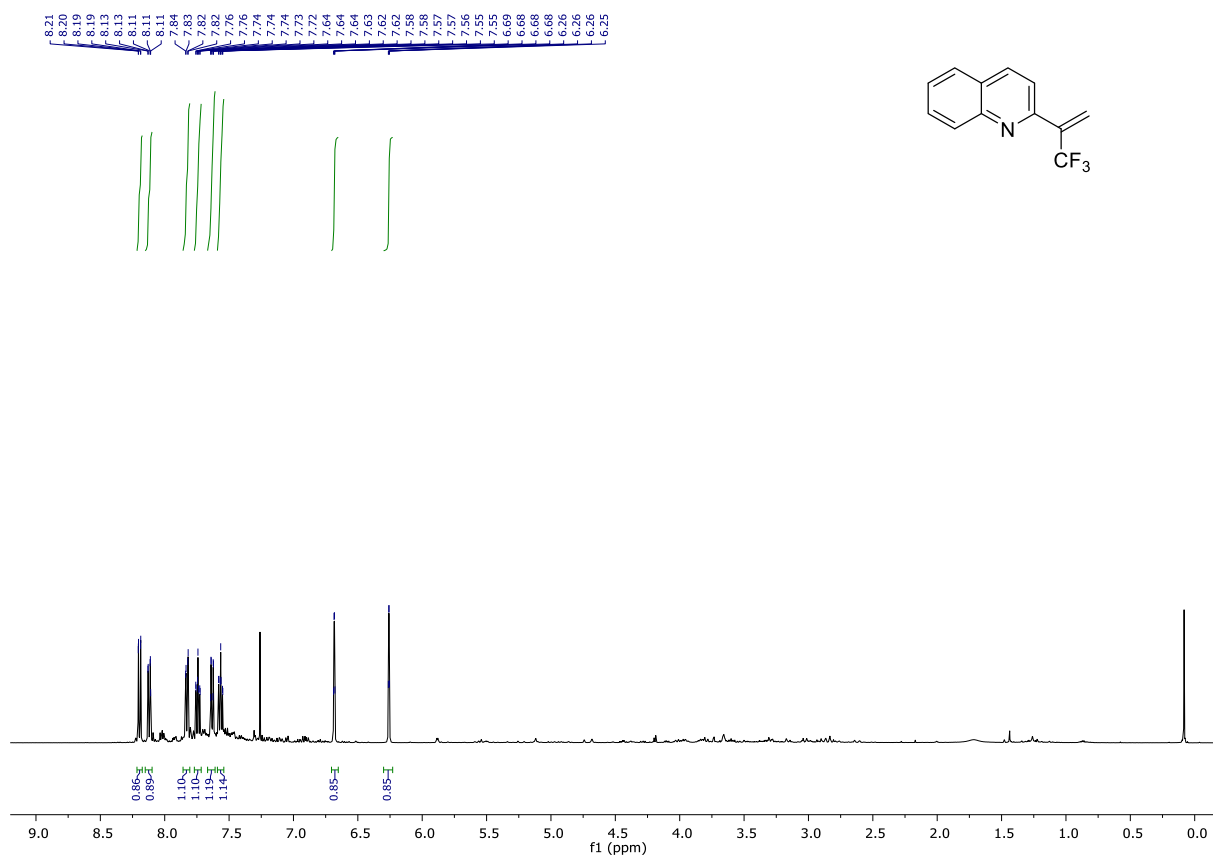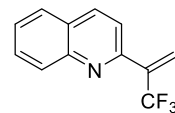

### <sup>13</sup>C NMR of 10

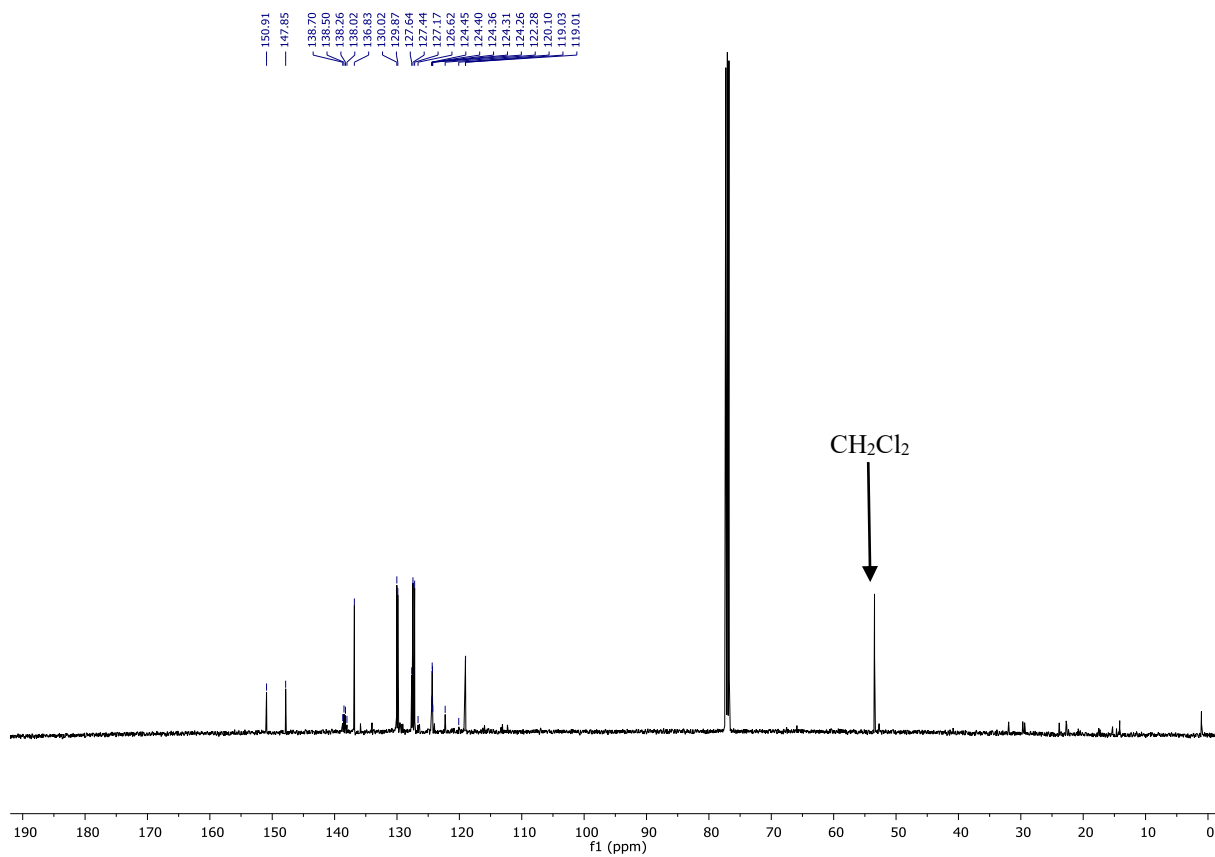

### <sup>19</sup>F NMR of 10

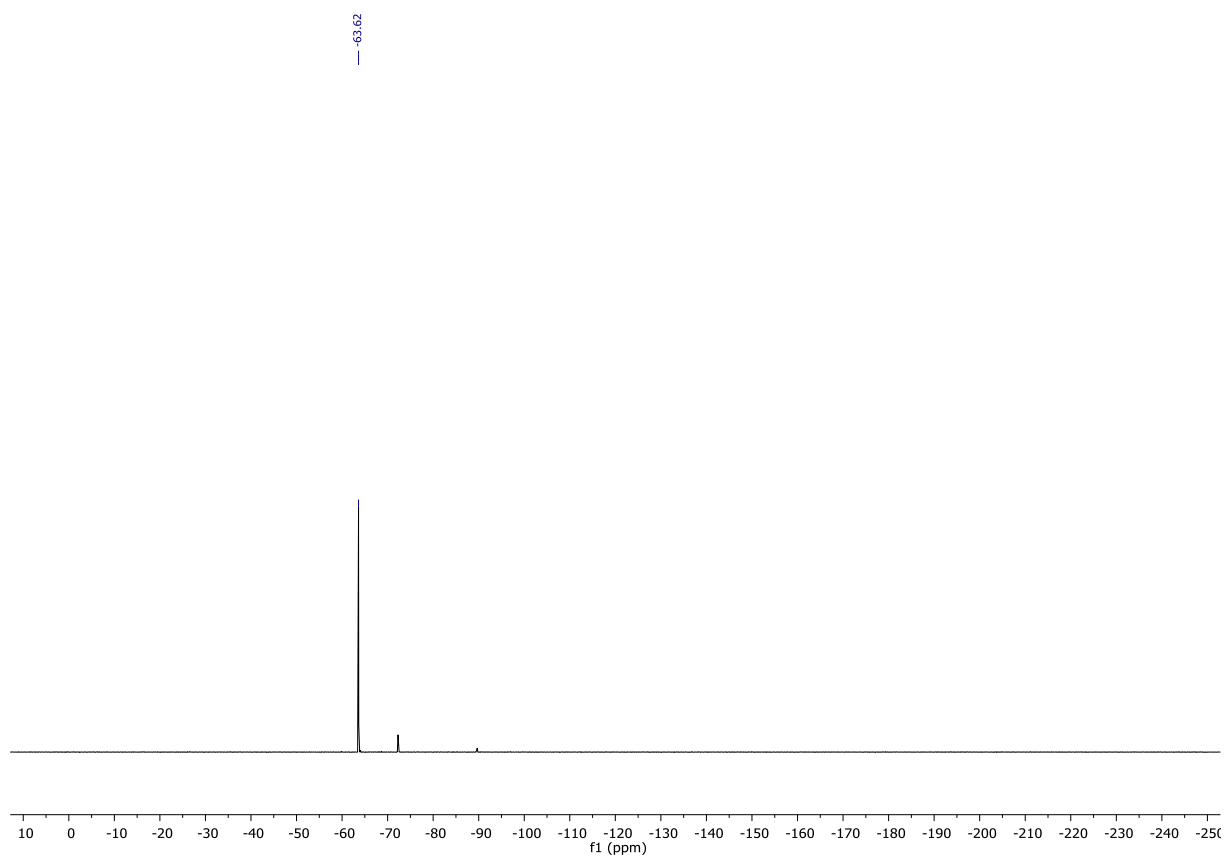

### <sup>1</sup>H NMR of 11

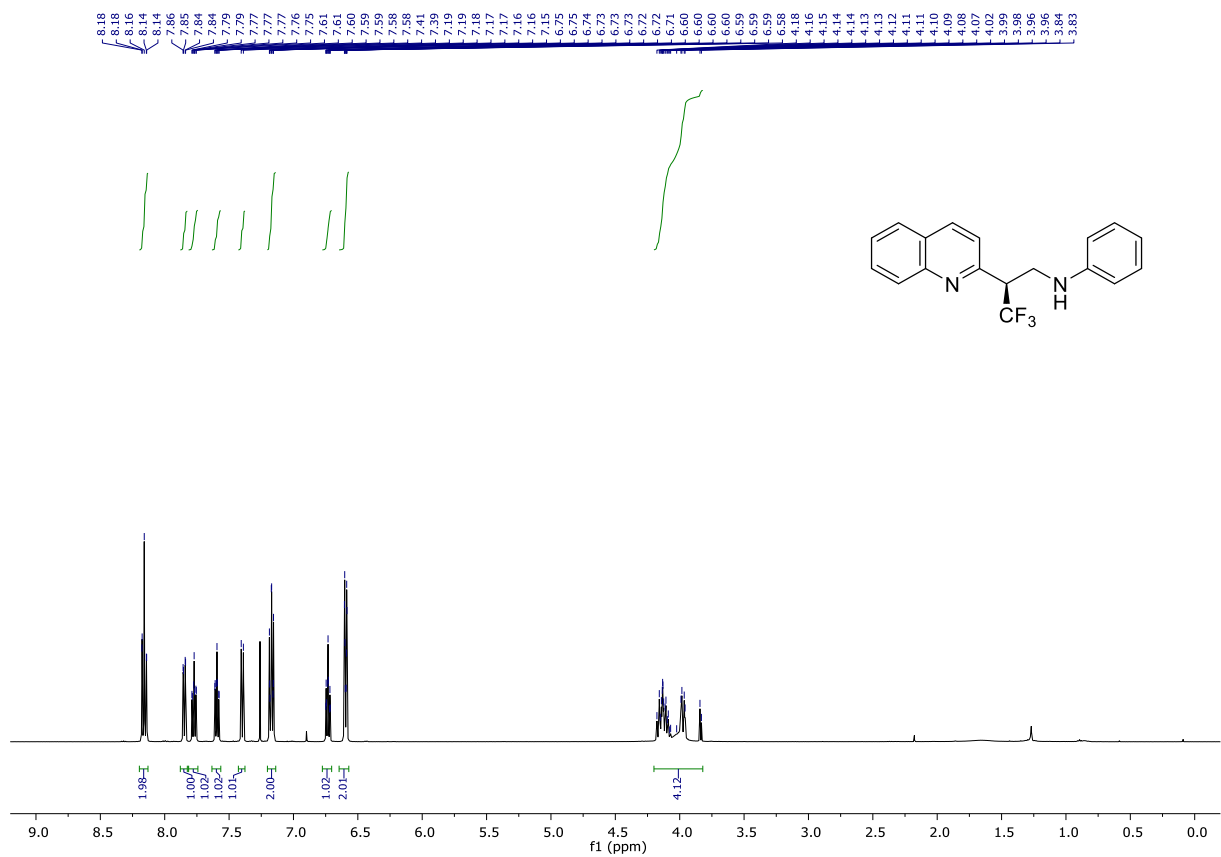

### <sup>13</sup>C NMR of 11

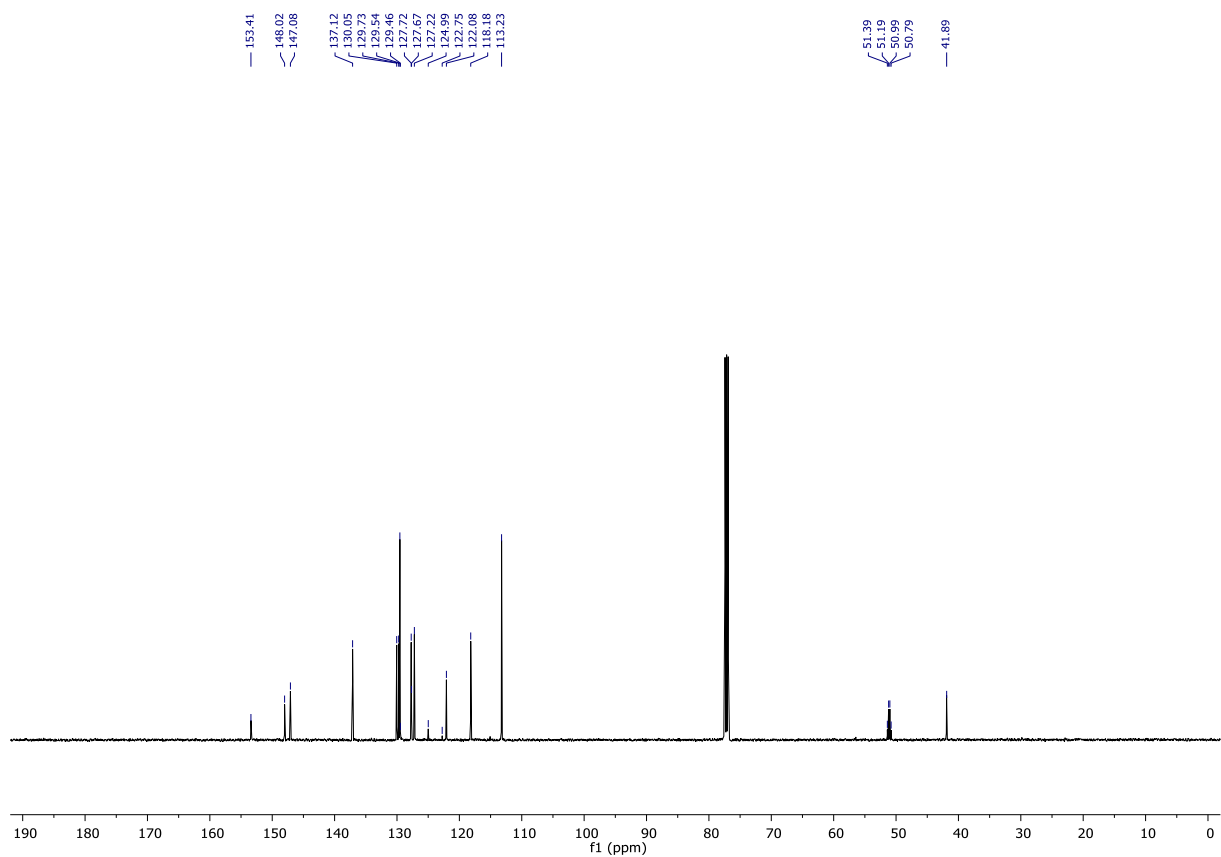

### <sup>19</sup>F NMR of 11

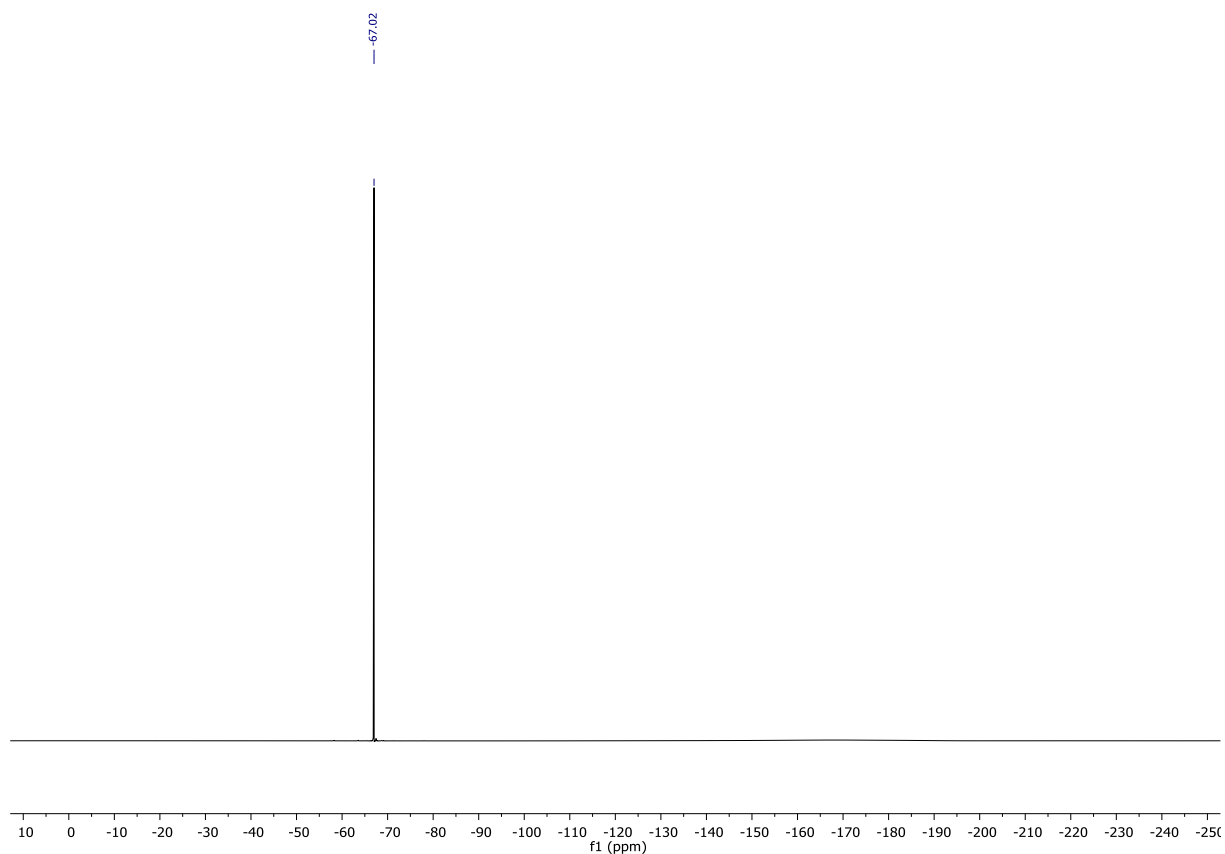

### <sup>1</sup>H NMR of 16

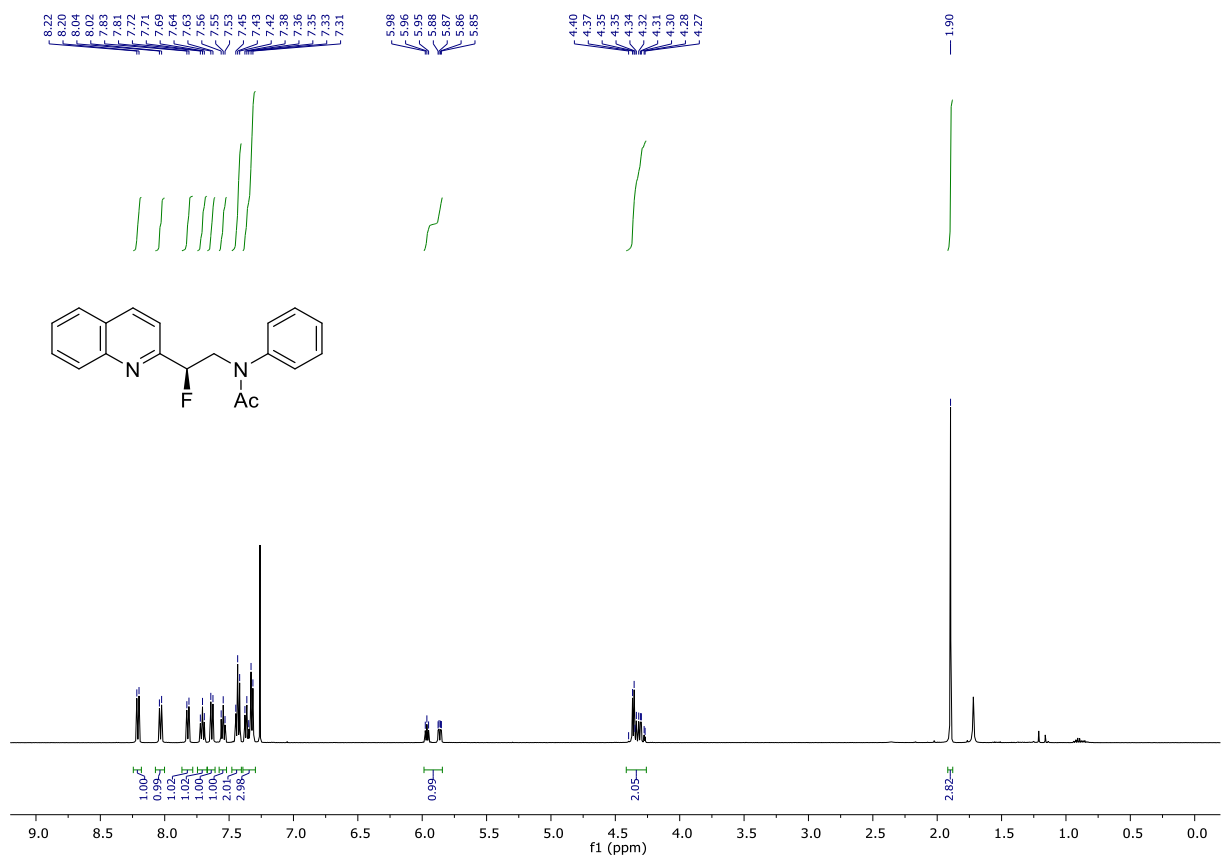



### <sup>13</sup>C NMR of 16

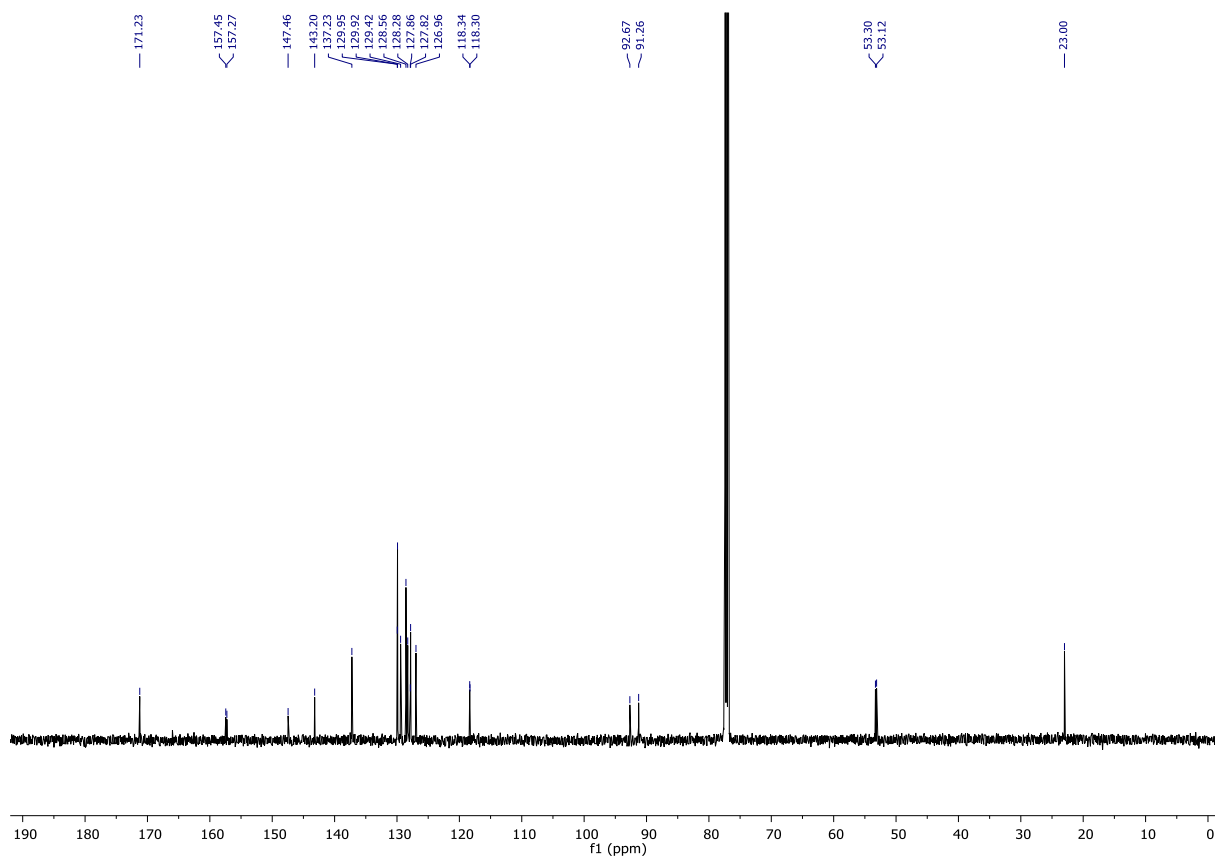

### <sup>19</sup>F NMR of 16

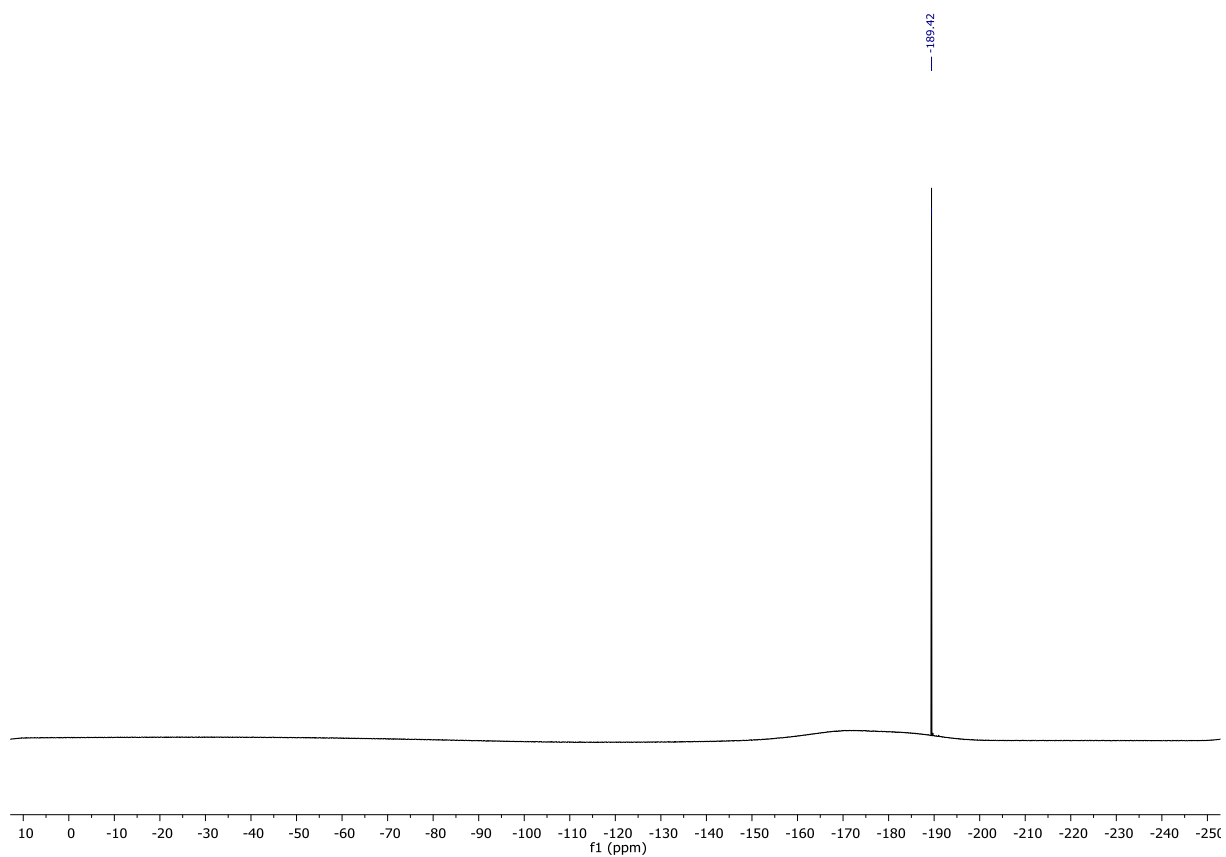

## 10. X-Ray Data

The datasets for all three compounds were collected using a Rigaku FR-X Ultrahigh Brilliance Microfocus RA generator/confocal optics with XtaLAB P200 diffractometer. The data for **7a** was collected at 125K with Cu radiation ( $\lambda = 1.54187 \text{ \AA}$ ), whereas the data for **11** and **16** were collected at 93 K with Mo radiation ( $\lambda = 0.71075 \text{ \AA}$ ). Intensity data were collected using  $\omega$  steps accumulating area detector images spanning at least a hemisphere of reciprocal space. All data were corrected for Lorentz polarization effects. A multiscan absorption correction was applied by using CrysAlisPro. The structure of **7a** was solved using direct methods (SIR2011), whereas **11** and **16** were solved using dual space methods (SHELXT). The structures were refined by full-matrix least-squares against  $F^2$  (SHELXL-2013). Non-hydrogen atoms were refined anisotropically, and hydrogen atoms were refined using a riding model, with the exception of H11 in **7a**, which was located via the electron density map. All calculations for **7a** were performed using the CrystalStructure interface and Olex2 for structures **11** and **16**. Selected crystallographic data are presented in Table 1. CCDC 1900849-1900851 contains the supplementary crystallographic data for this paper. The data can be obtained free of charge from the Cambridge Crystallographic Data Centre via [www.ccdc.cam.ac.uk/structures](http://www.ccdc.cam.ac.uk/structures).

|                                                         | <b>7a</b>                                       | <b>16</b>                                         | <b>11</b>                                                     |
|---------------------------------------------------------|-------------------------------------------------|---------------------------------------------------|---------------------------------------------------------------|
| Crystal data                                            |                                                 |                                                   |                                                               |
| Chemical formula                                        | C <sub>17</sub> H <sub>15</sub> FN <sub>2</sub> | C <sub>19</sub> H <sub>17</sub> FN <sub>2</sub> O | C <sub>18</sub> H <sub>15</sub> F <sub>3</sub> N <sub>2</sub> |
| $M_r$                                                   | 266.32                                          | 308.35                                            | 316.32                                                        |
| Crystal system, space group                             | Orthorhombic, $P2_12_12_1$                      | Monoclinic, $C2/c$                                | Monoclinic, $P2_1$                                            |
| Temperature (K)                                         | 125                                             | 93                                                | 93                                                            |
| $a, b, c$ (Å)                                           | 5.44863 (10), 10.49560 (18), 23.5843 (4)        | 18.6107 (4), 7.75338 (14), 23.2547 (5)            | 10.1249 (3), 5.4916 (1), 13.3402 (5)                          |
| $\alpha, \beta, \gamma$ (°)                             | 90, 90, 90                                      | 90, 111.212 (2), 90                               | 90, 93.978 (3), 90                                            |
| $V$ (Å <sup>3</sup> )                                   | 1348.71 (4)                                     | 3128.21 (12)                                      | 739.95 (4)                                                    |
| $Z$                                                     | 4                                               | 8                                                 | 2                                                             |
| Radiation type                                          | Cu $K\alpha$                                    | Mo $K\alpha$                                      | Mo $K\alpha$                                                  |
| $\mu$ (mm <sup>-1</sup> )                               | 0.71                                            | 0.09                                              | 0.11                                                          |
| Crystal size (mm)                                       | 0.12 × 0.10 × 0.10                              | 0.27 × 0.18 × 0.06                                | 0.36 × 0.09 × 0.03                                            |
| Data collection                                         |                                                 |                                                   |                                                               |
| $T_{\min}, T_{\max}$                                    | 0.889, 0.932                                    | 0.881, 0.995                                      | 0.871, 1.000                                                  |
| No. of measured, independent and observed reflections   | 15722, 2741, 2729                               | 22904, 3460, 3247                                 | 8314, 2968, 2587                                              |
| $R_{\text{int}}$                                        | 0.019                                           | 0.018                                             | 0.022                                                         |
| $(\sin \theta/\lambda)_{\text{max}}$ (Å <sup>-1</sup> ) | 0.628                                           | 0.664                                             | 0.660                                                         |

| Refinement                                                  |                    |                    |                    |
|-------------------------------------------------------------|--------------------|--------------------|--------------------|
| $R[F^2 > 2\sigma(F^2)],$<br>$wR(F^2), S$                    | 0.027, 0.071, 1.09 | 0.040, 0.107, 1.02 | 0.039, 0.103, 1.06 |
| No. of reflections                                          | 2741               | 3460               | 2968               |
| No. of parameters                                           | 186                | 209                | 256                |
| No. of restraints                                           | 1                  | 0                  | 8                  |
| $\Delta\rho_{\max}, \Delta\rho_{\min}$ (e Å <sup>-3</sup> ) | 0.16, -0.18        | 0.50, -0.31        | 0.24, -0.23        |
| Absolute structure parameter                                | 0.06 (4)           | –                  | -0.2 (3)           |

Computer programs: *CrysAlis PRO* 1.171.39.8d (Rigaku OD, 2015), *CrysAlis PRO* 1.171.40.29a (Rigaku OD, 2018), *SIR2011* (Burla, *et al.*, 2012), *SHELXT* Version 2014/4 (Sheldrick, 2014), *SHELXT* (Sheldrick, 2015), *SHELXL* Version 2014/7 (Sheldrick, 2008), *SHELXL* (Sheldrick, 2015), *Olex2* (Dolomanov *et al.*, 2009), *CrystalStructure* 4.2 (Rigaku, 2015), *CrystalStructure* 4.3 (Rigaku, 2018).
